# Supplementary material for: Genome-wide association and high-resolution phenotyping link Oryza sativa panicle traits to numerous trait-specific QTL clusters
Source: PubMed Central journal article supplement (PMC4742901; doi:10.1038/ncomms10527), 2016-02-04
Supplement: ncomms10527-s1.pdf [file ncomms10527-s1.pdf]

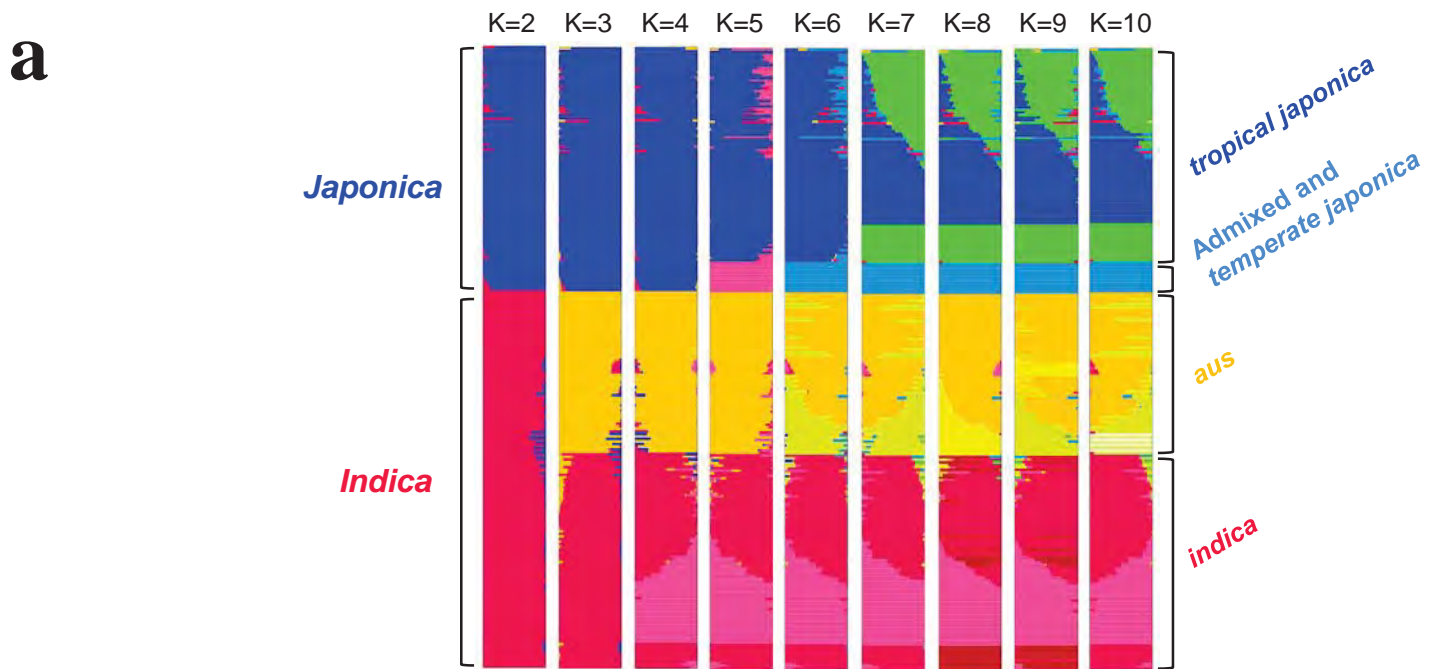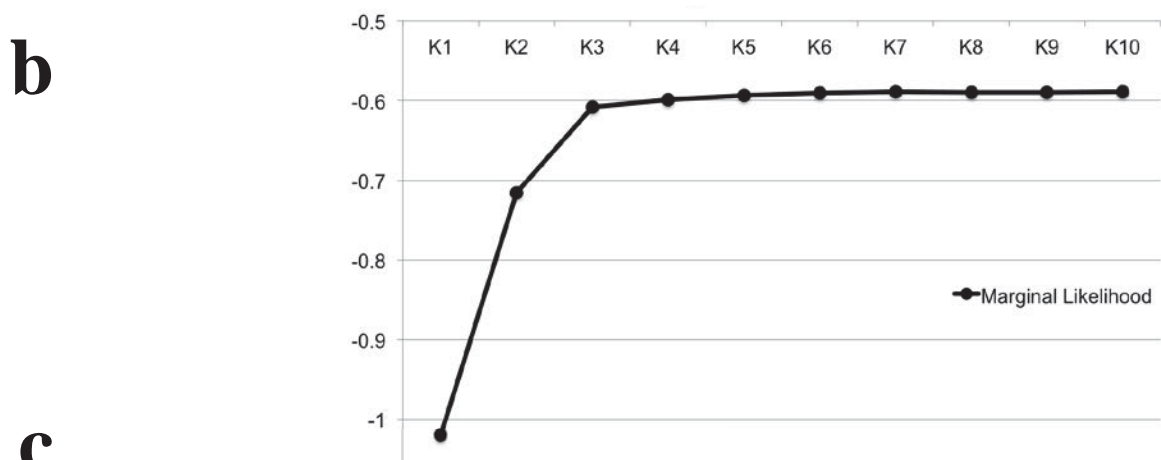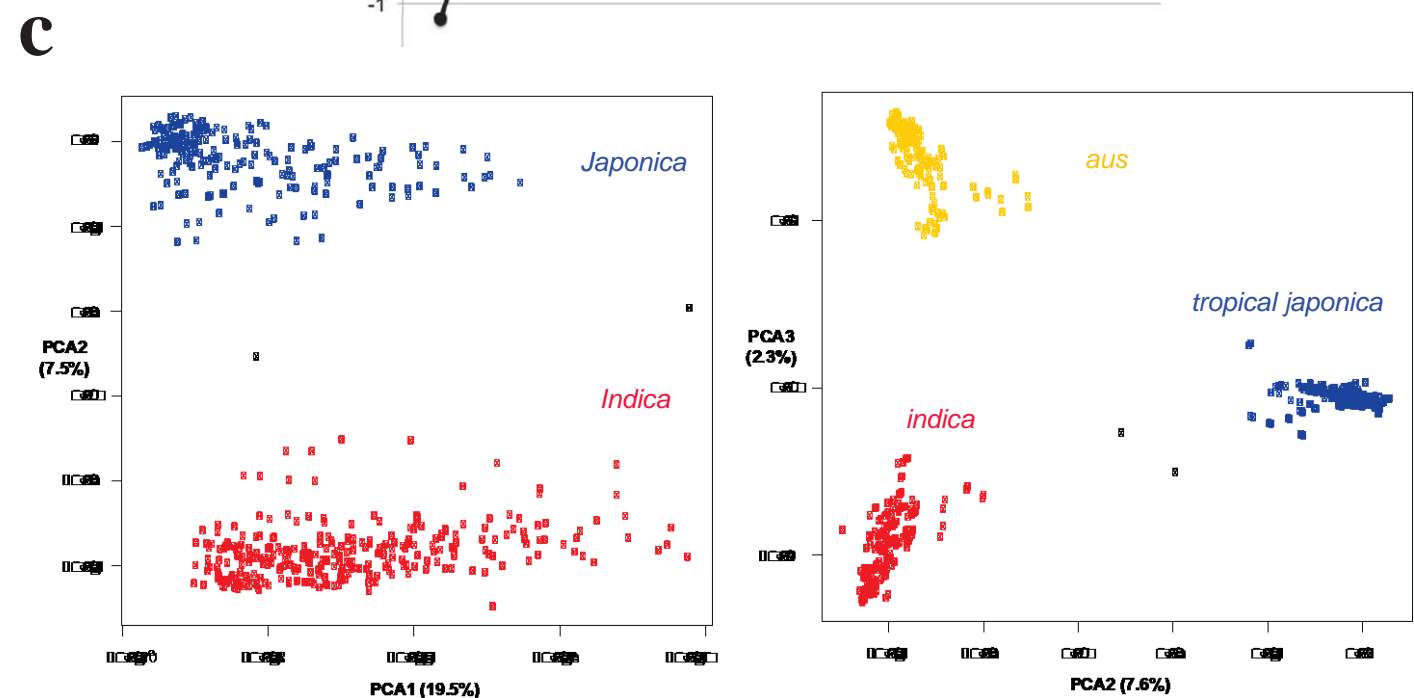

**Supplementary Figure 1. Genetic architecture of the diversity panel.** (a, b) Genetic structure of the panel analyzed using the program *fastStructure*. Although a  $K=8$  maximizes the marginal likelihood within the panel (a), the marginal likelihood begins to plateau at a  $K=3$  (c) Principle components analysis reveals that the first 3 principle components explain ~30% of the genetic variance within the panel.

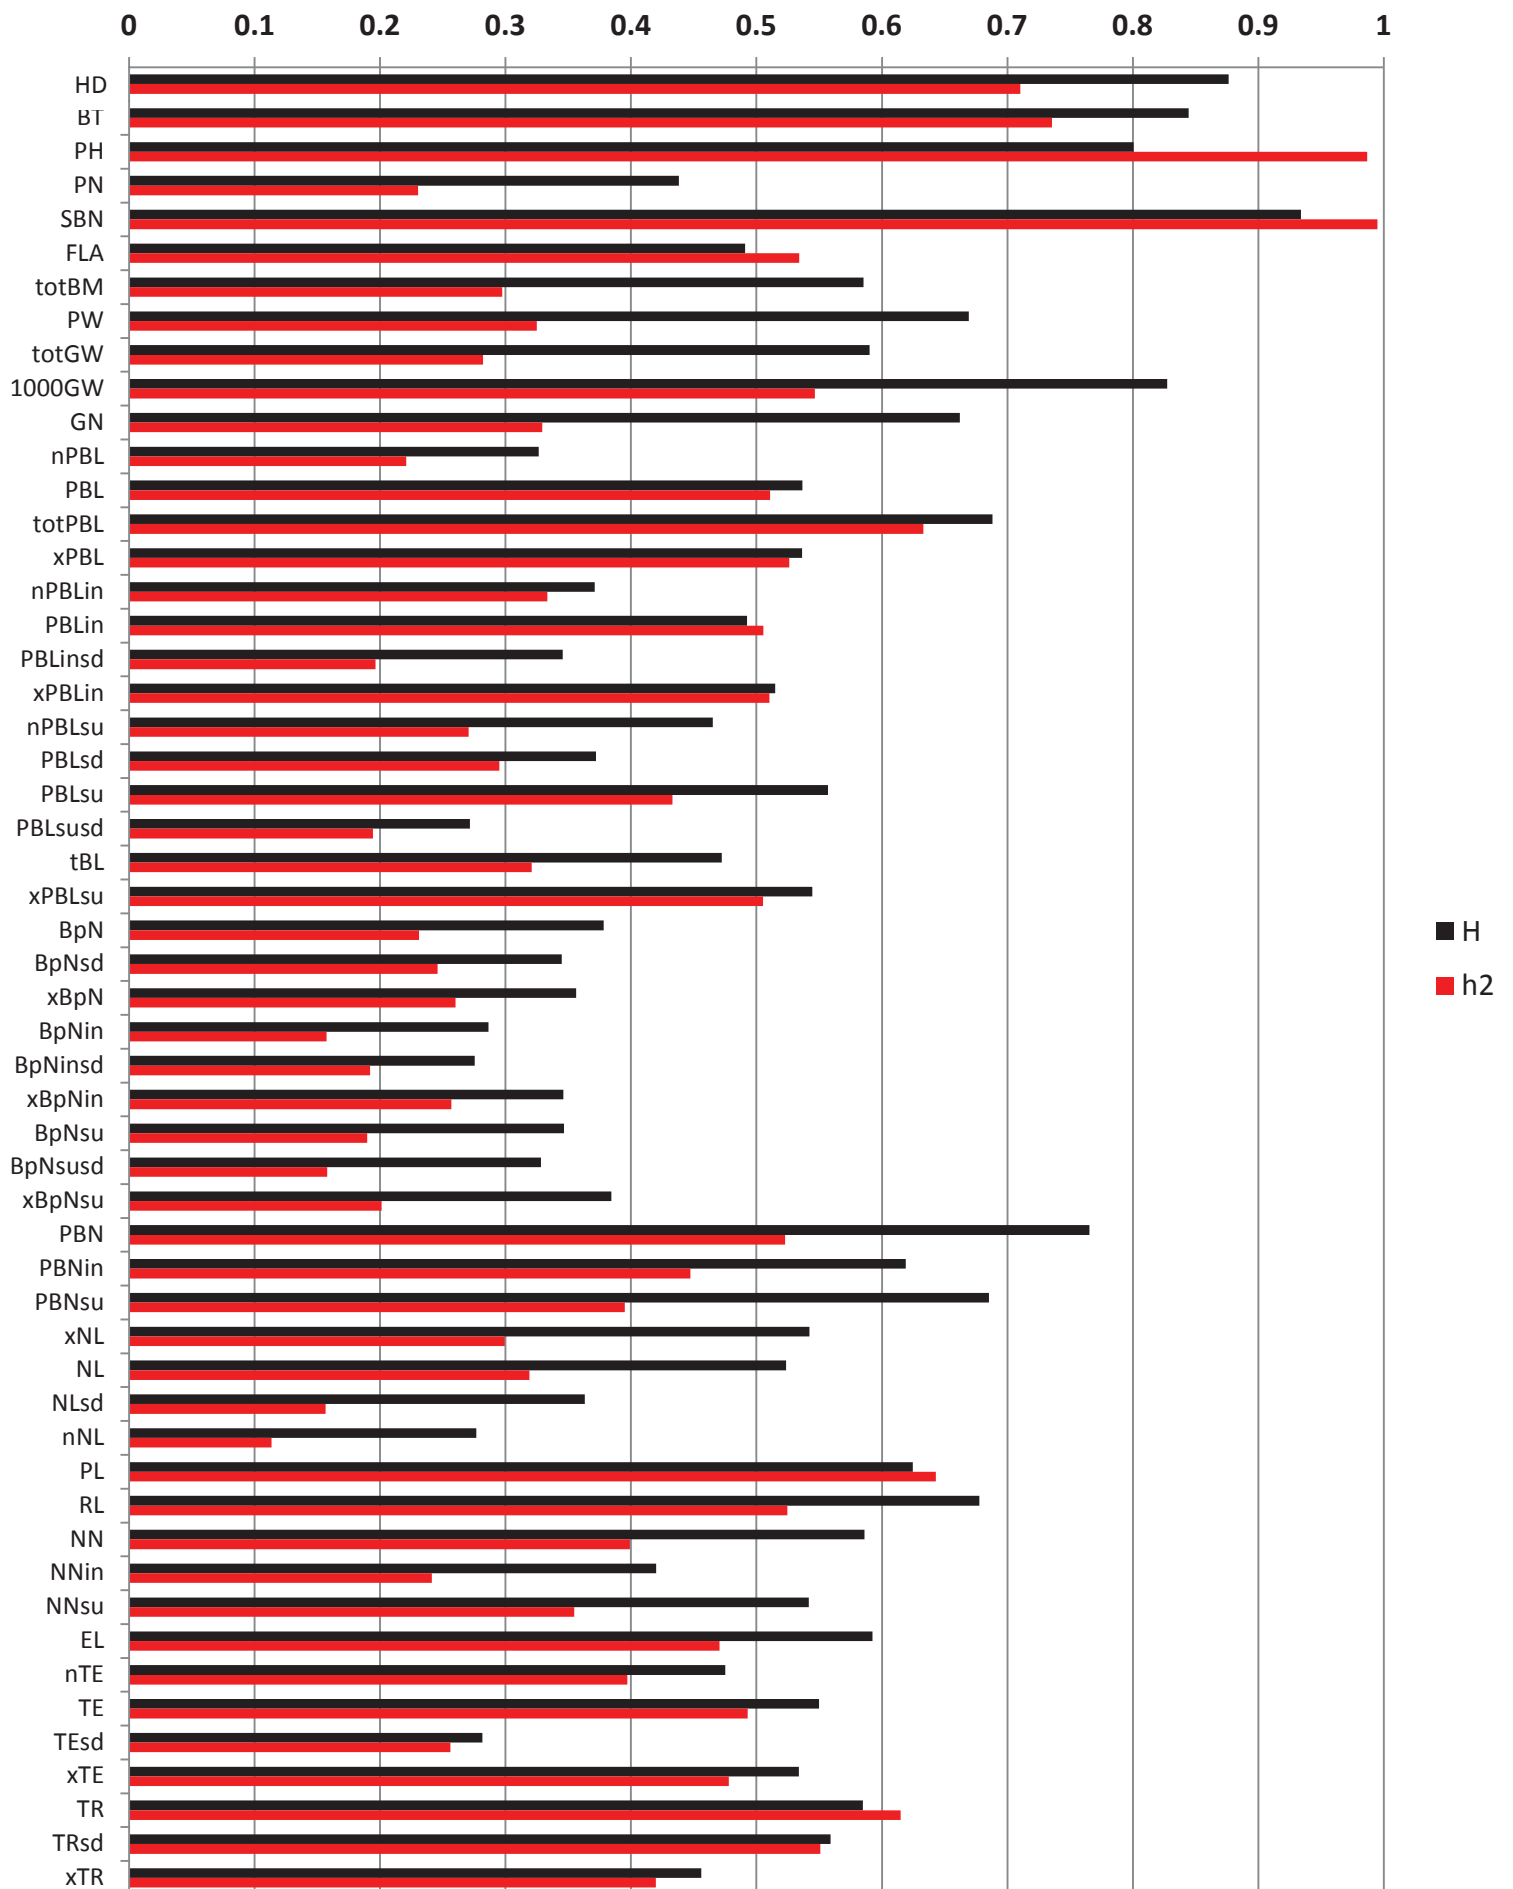

**Supplementary Figure 2. Heritability of traits.** Broad (H) and narrow sense ( $h^2$ ) heritability of traits are estimated using repeatability among raw measures and additive+dominance (AD) heritability, respectively. Trait abbreviations correspond to Supplementary Table 2.

**Supplementary Figure 3-4. Trait-by-trait relationships.** The lower and upper triangles were calculated using varieties in the *Indica* and *Japonica* varietal groups, respectively. Trait abbreviations correspond to phenotypes listed in Supplementary Table 2. (\*\* P < 0.001, \*\*\* P < 0.0001). Supplementary Figure 3 corresponds to phenotype-by-phenotype correlations. Supplementary Figure 4 contains genetic correlations, calculated as correlations between genetic best linear unbiased predictors (GBLUPS).

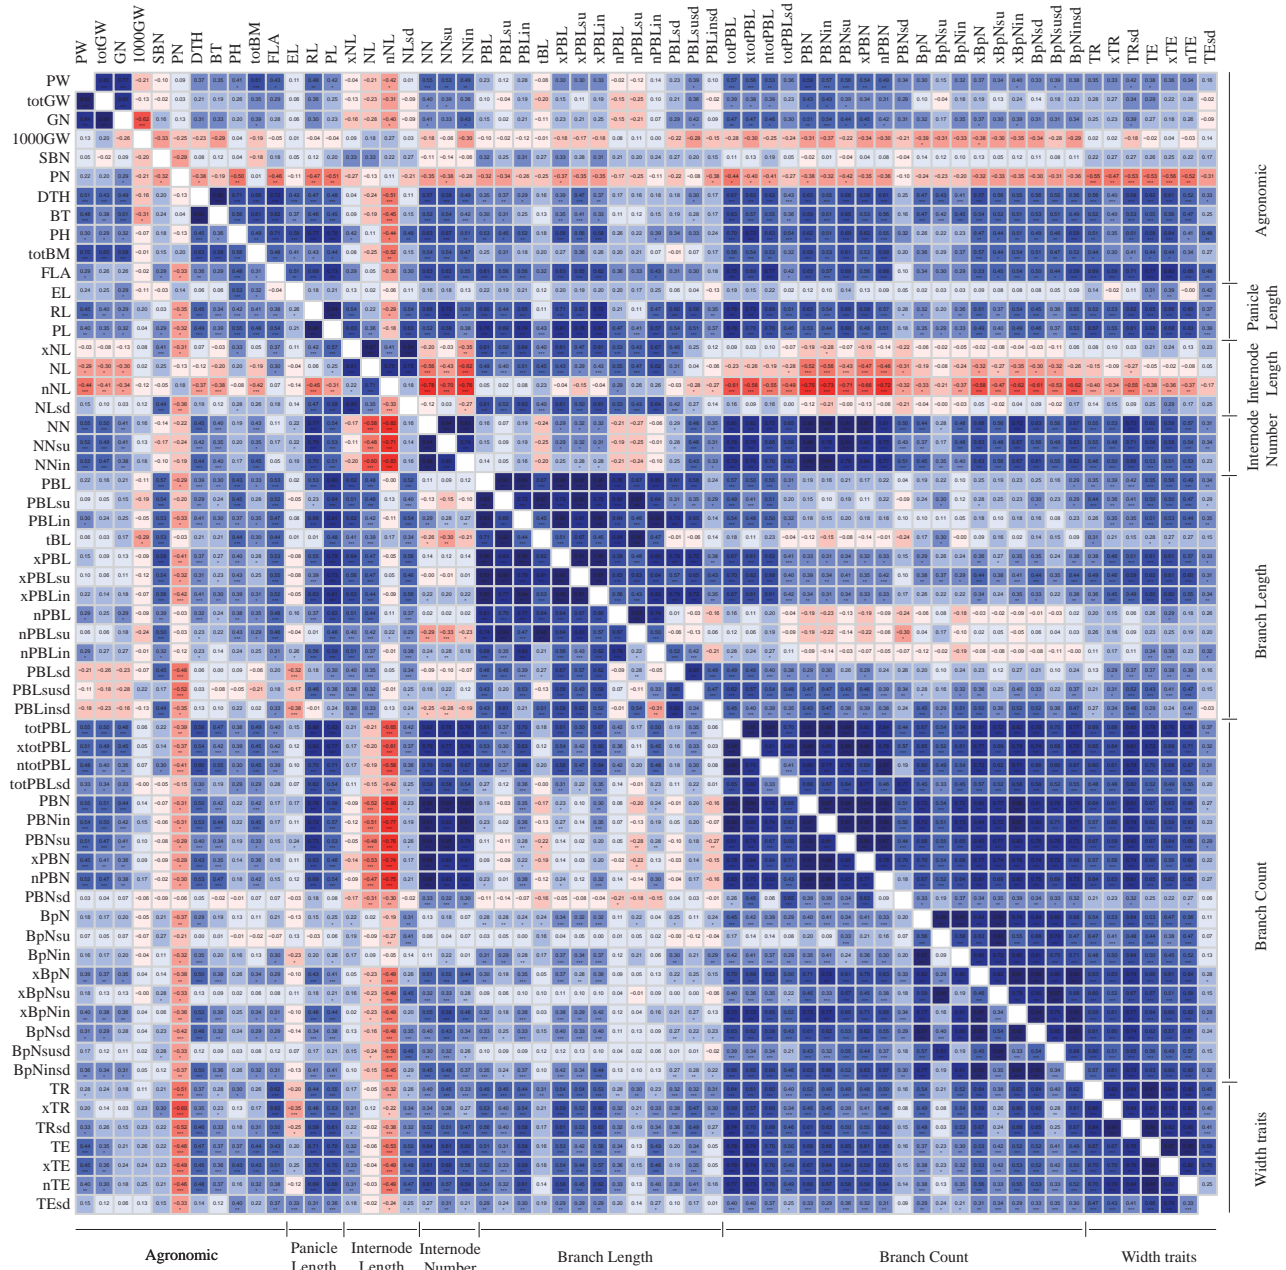

Supplementary Figure 3. Pairwise phenotype correlations.



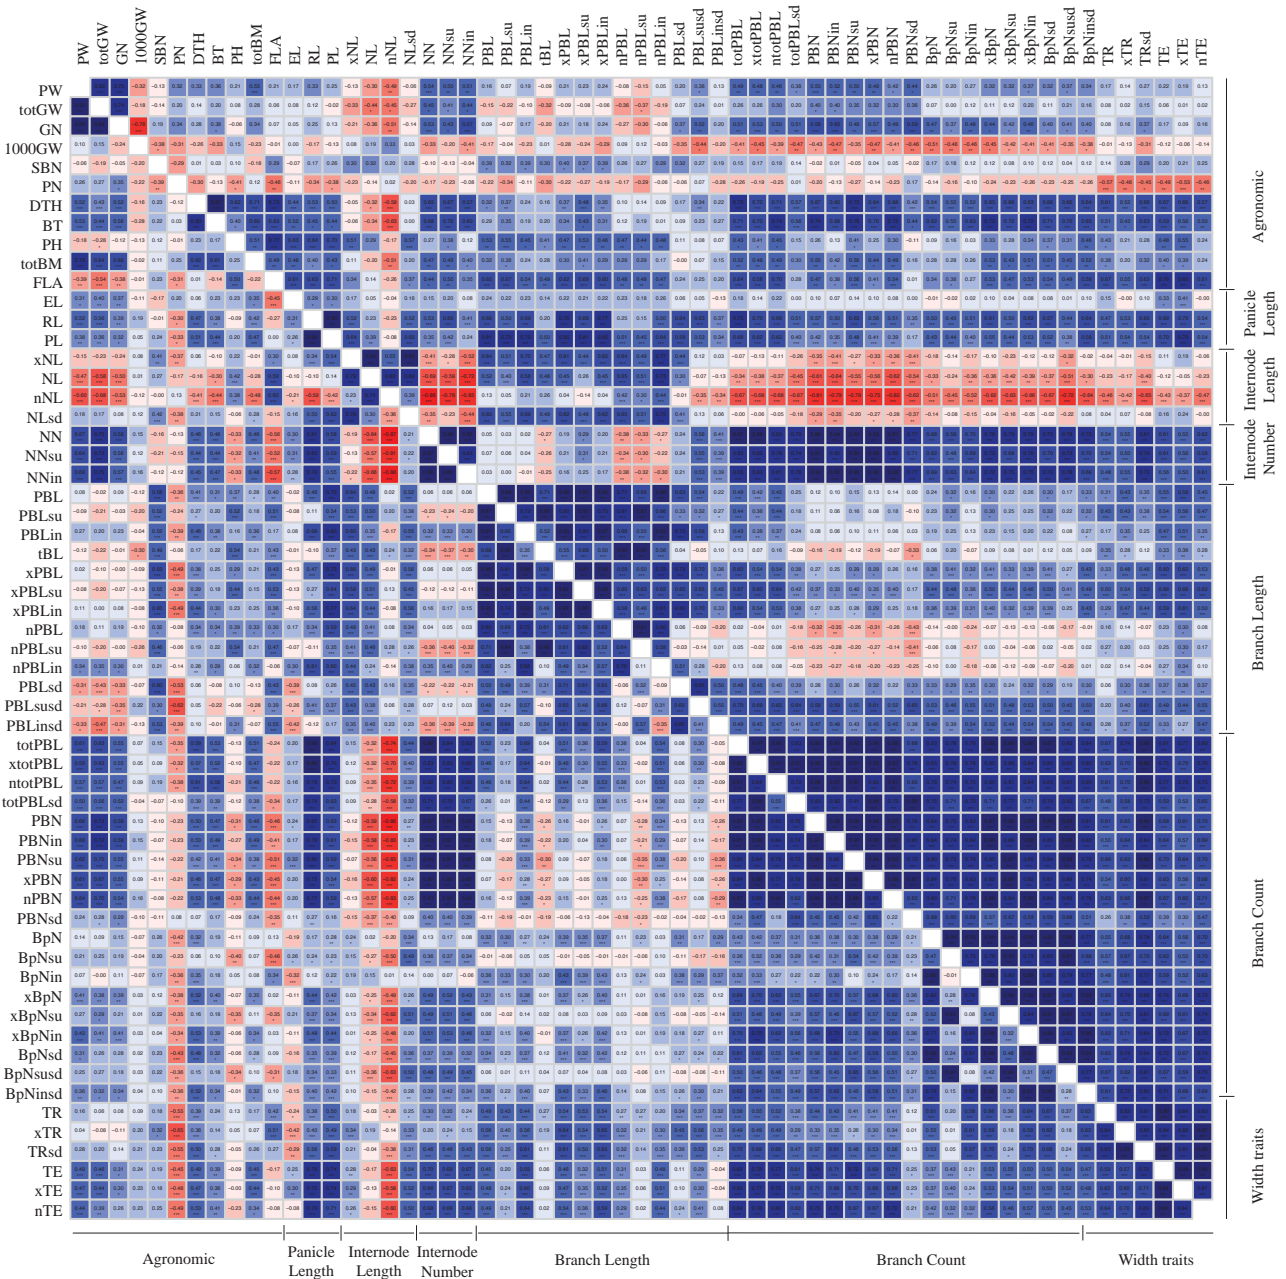

Supplementary Figure 4. Pairwise genetic correlations between traits.

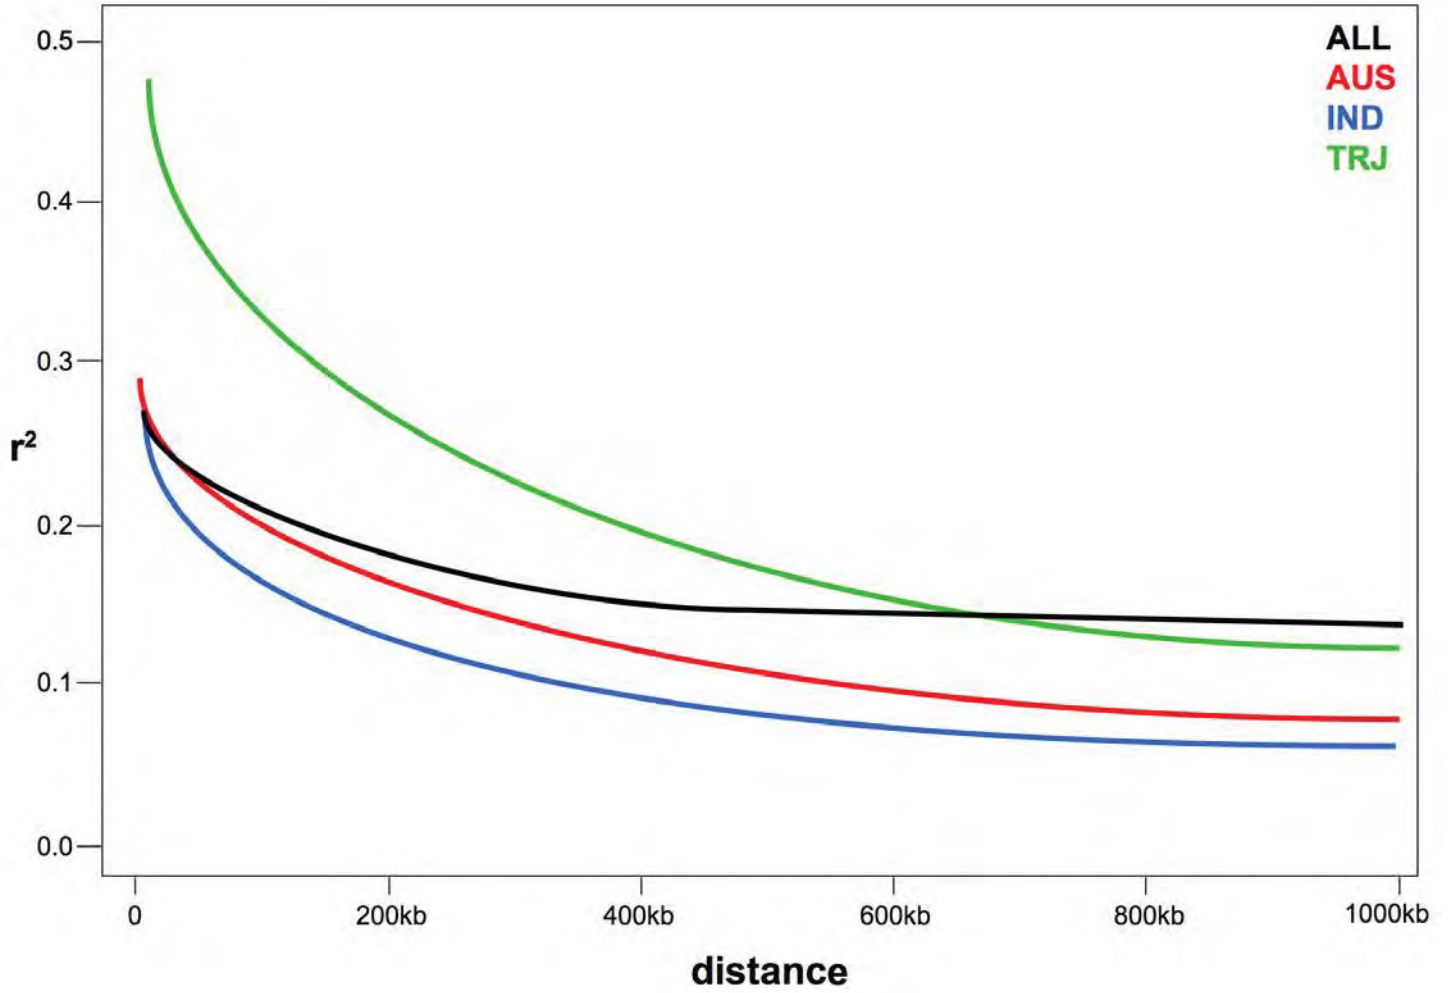

**Supplementary Figure 5. LD decay in subpopulations.** Average genome-wide linkage disequilibrium (LD) decay as a function of distance, measured as  $r^2$ , using pairwise comparisons of SNPs.

**Supplementary Figures 6-65. Genome-wide association (GWAS) results separated by trait.** (a) A histogram depicting the trait averages of every variety within the panel. (b) A boxplot depicting the mean and range of each phenotype, divided by subpopulation: *aus* (AUS), *indica* (IND), and *tropical japonica* (TRJ). The admixed and *temperate japonica* lines were grouped together in the same boxplot (Admix\_or\_TEJ). (c) Manhattan plots and quantile-quantile (QQ) plots summarizing GWAS SNP association results for every trait and subpopulation combination. ALL indicates that every variety in the panel was used when performing associations. For agronomic phenotypes, varietal groups were used instead of subpopulations in order to increase statistical power (*Indica*: *aus* and *indica* lines; *Japonica*: *tropical japonica*, *temperate japonica*, and admixed *japonica* lines). SNPs in red indicate that an *a priori* candidate gene fell within ~30kb of the significant associations. (d) Manhattan plots and QQ plots summarizing GWAS SNP associations for every trait and subpopulation combination, using the heading date covariate within the mixed model.

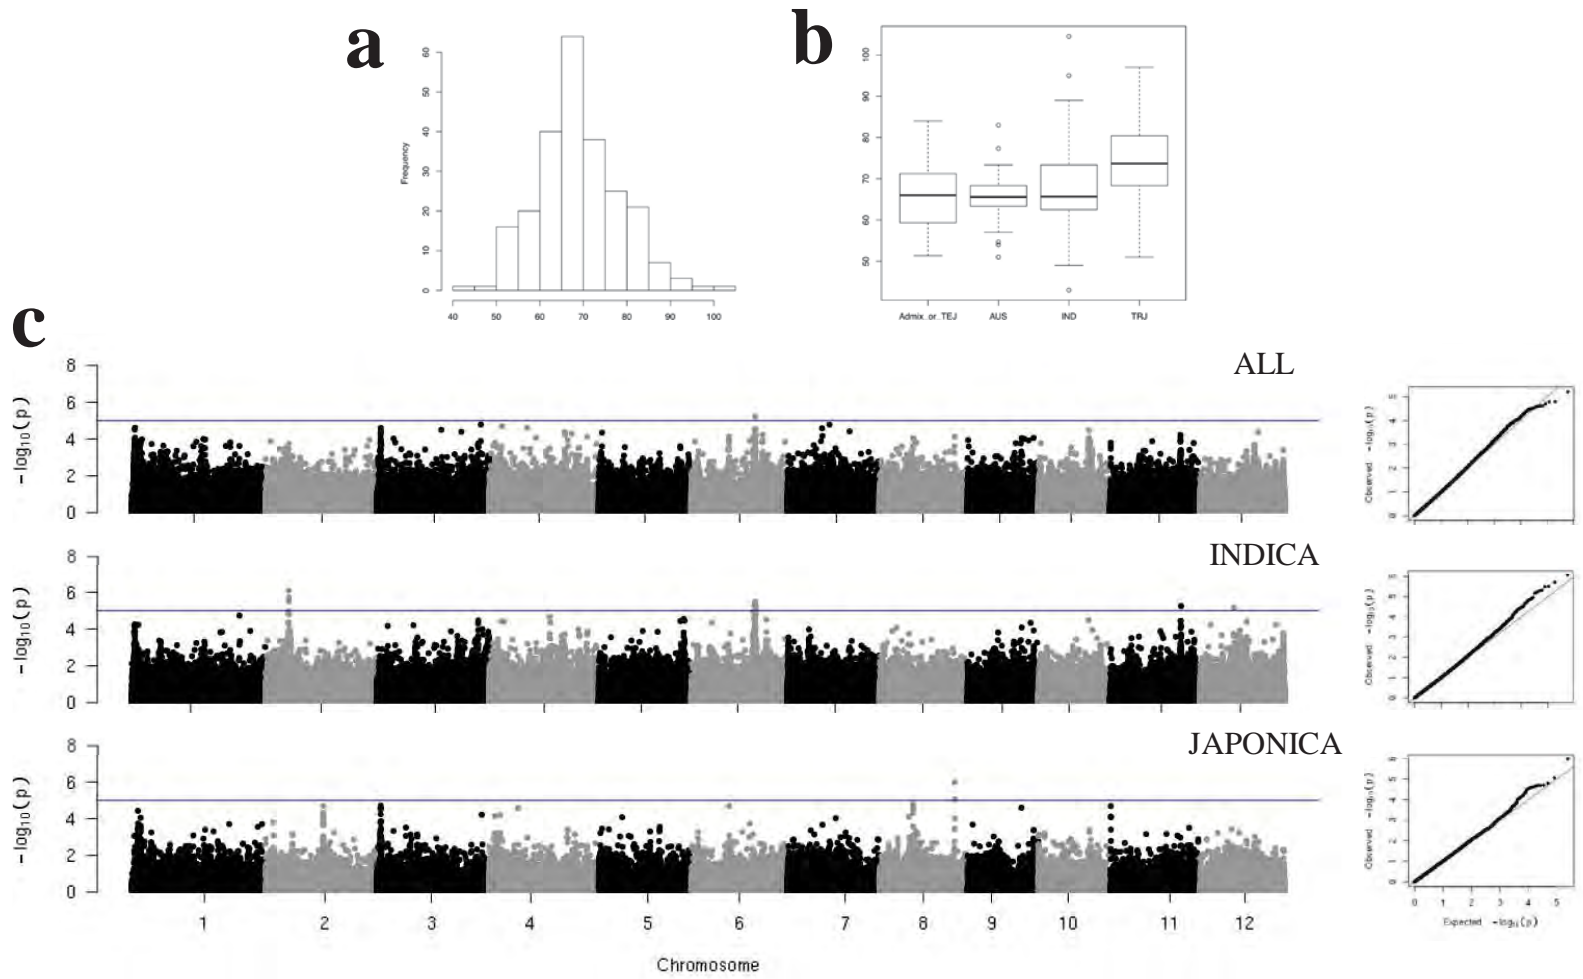

**Supplementary Figure 6. Summary of GWAS results for Heading Date (days after transplanting).** (a, b) Phenotypic distributions. (c) Mixed model controlling for subpopulation structure across all varieties (ALL) and within the two major varietal groups *Indica* (INDICA) and *Japonica* (JAPONICA).

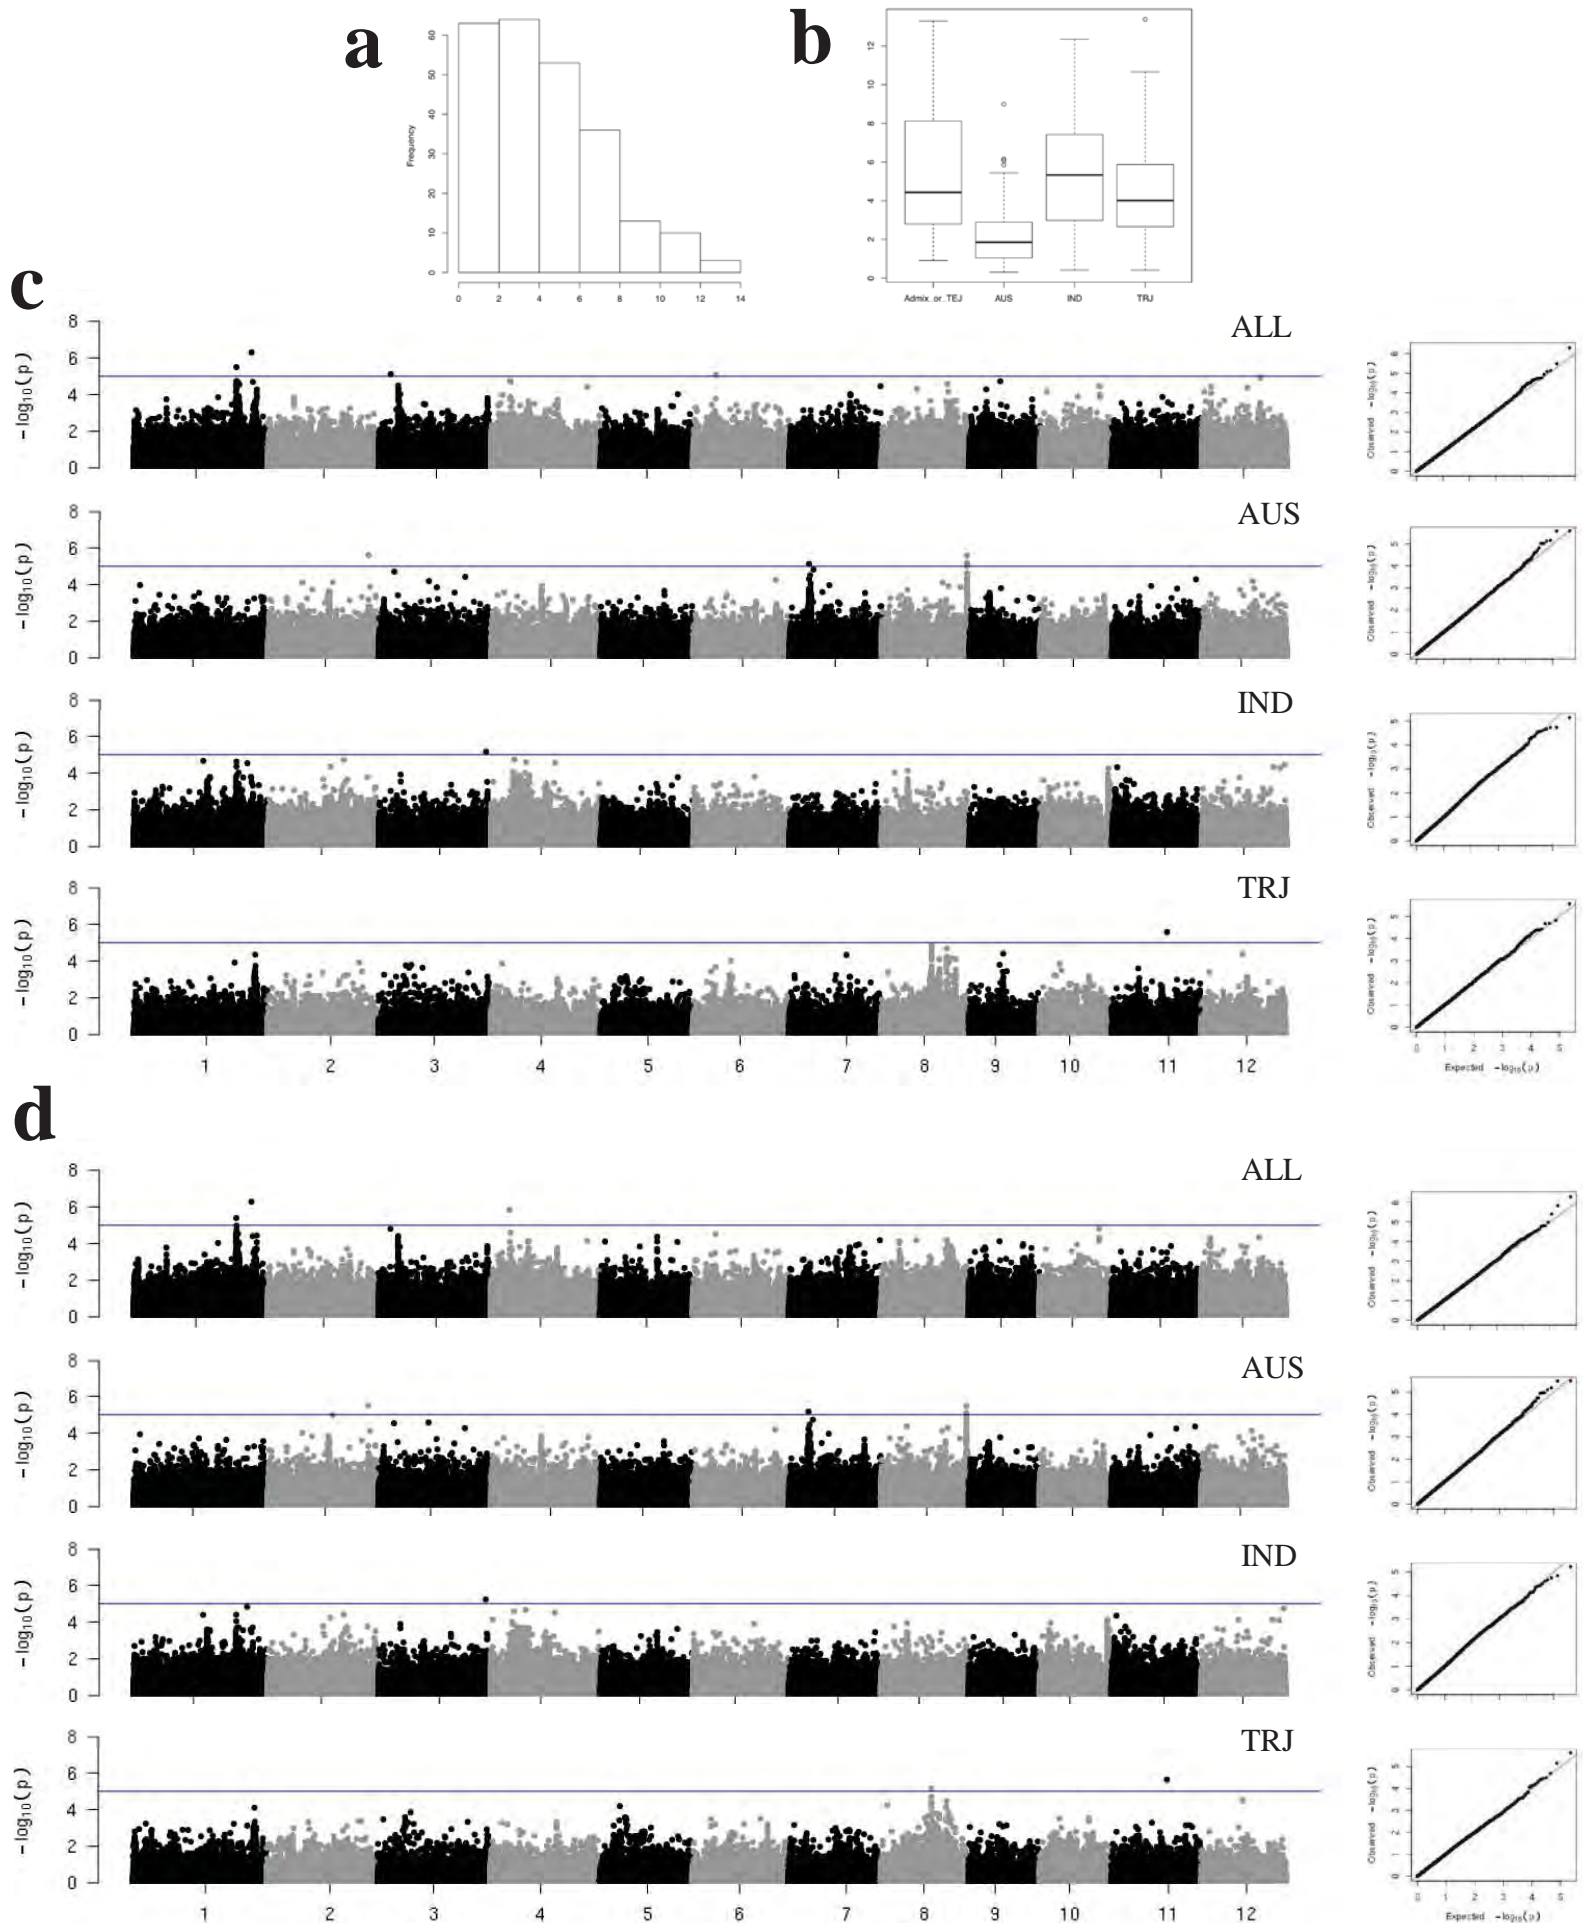

**Supplementary Figure 7. Summary of GWAS results for Exsertion Length (cm).** (a, b) Phenotypic distributions. (c) Mixed model controlling for subpopulation structure across all varieties (ALL) and within individual subpopulations (AUS = *aus*, IND = *indica*, TRJ = *tropical japonica*). (d) Mixed model with heading date as a covariate.



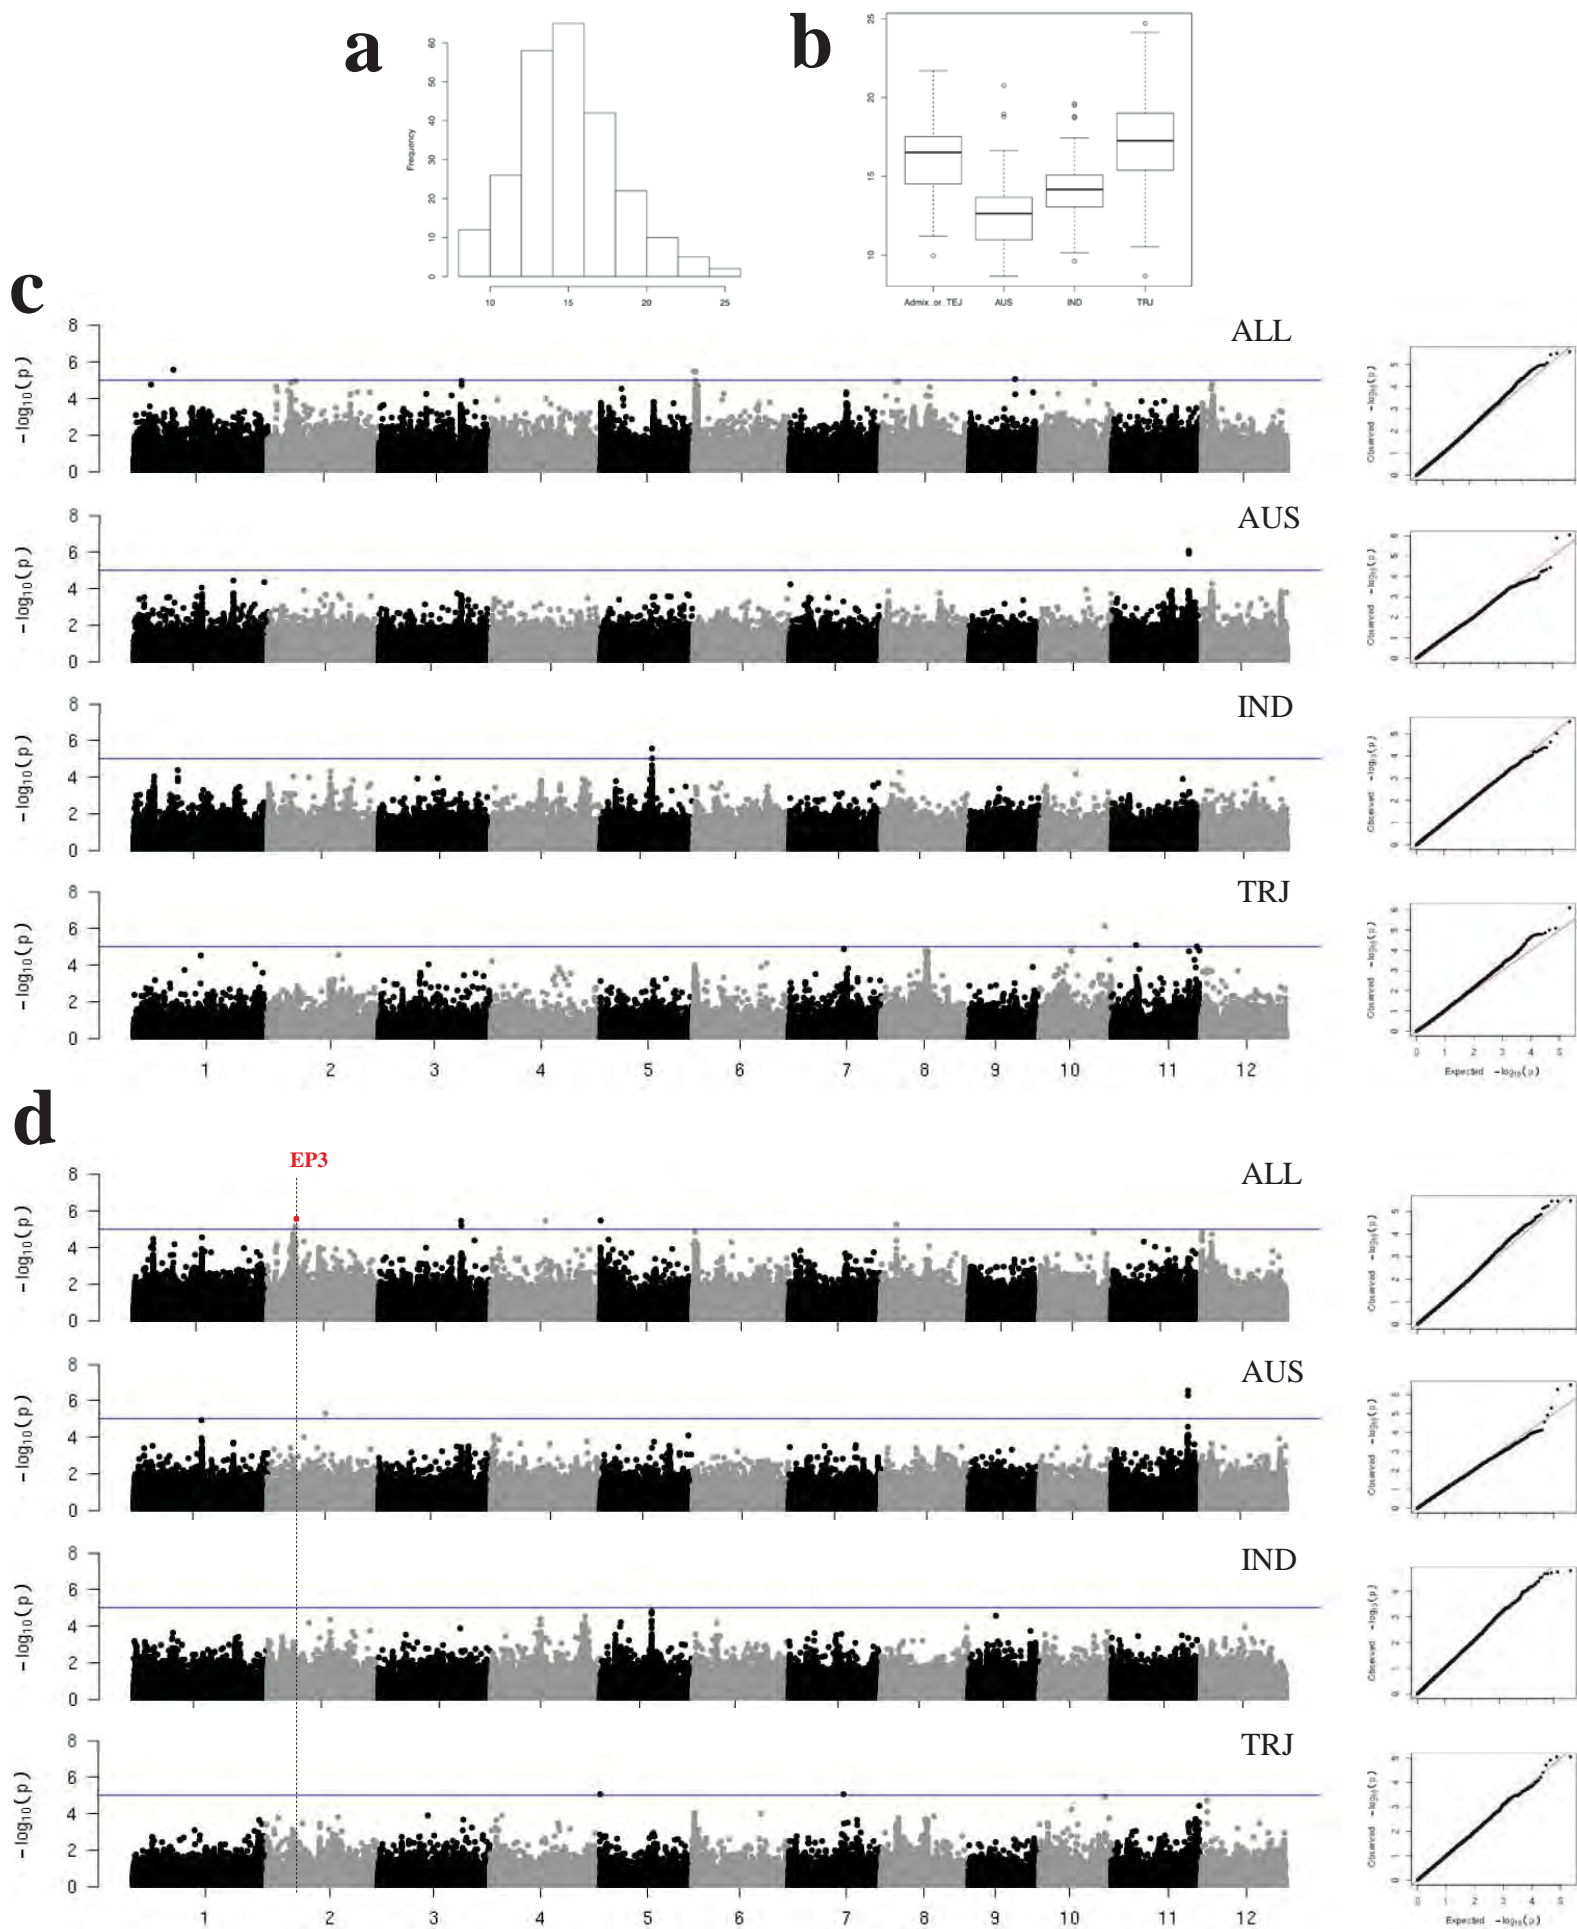

**Supplementary Figure 8. Summary of GWAS results for Rachis Length (cm).** (a, b) Phenotypic distributions. (c) Mixed model controlling for subpopulation structure across all varieties (ALL) and within individual subpopulations (AUS = *aus*, IND = *indica*, TRJ = *tropical japonica*). (d) Mixed model with heading date as a covariate.

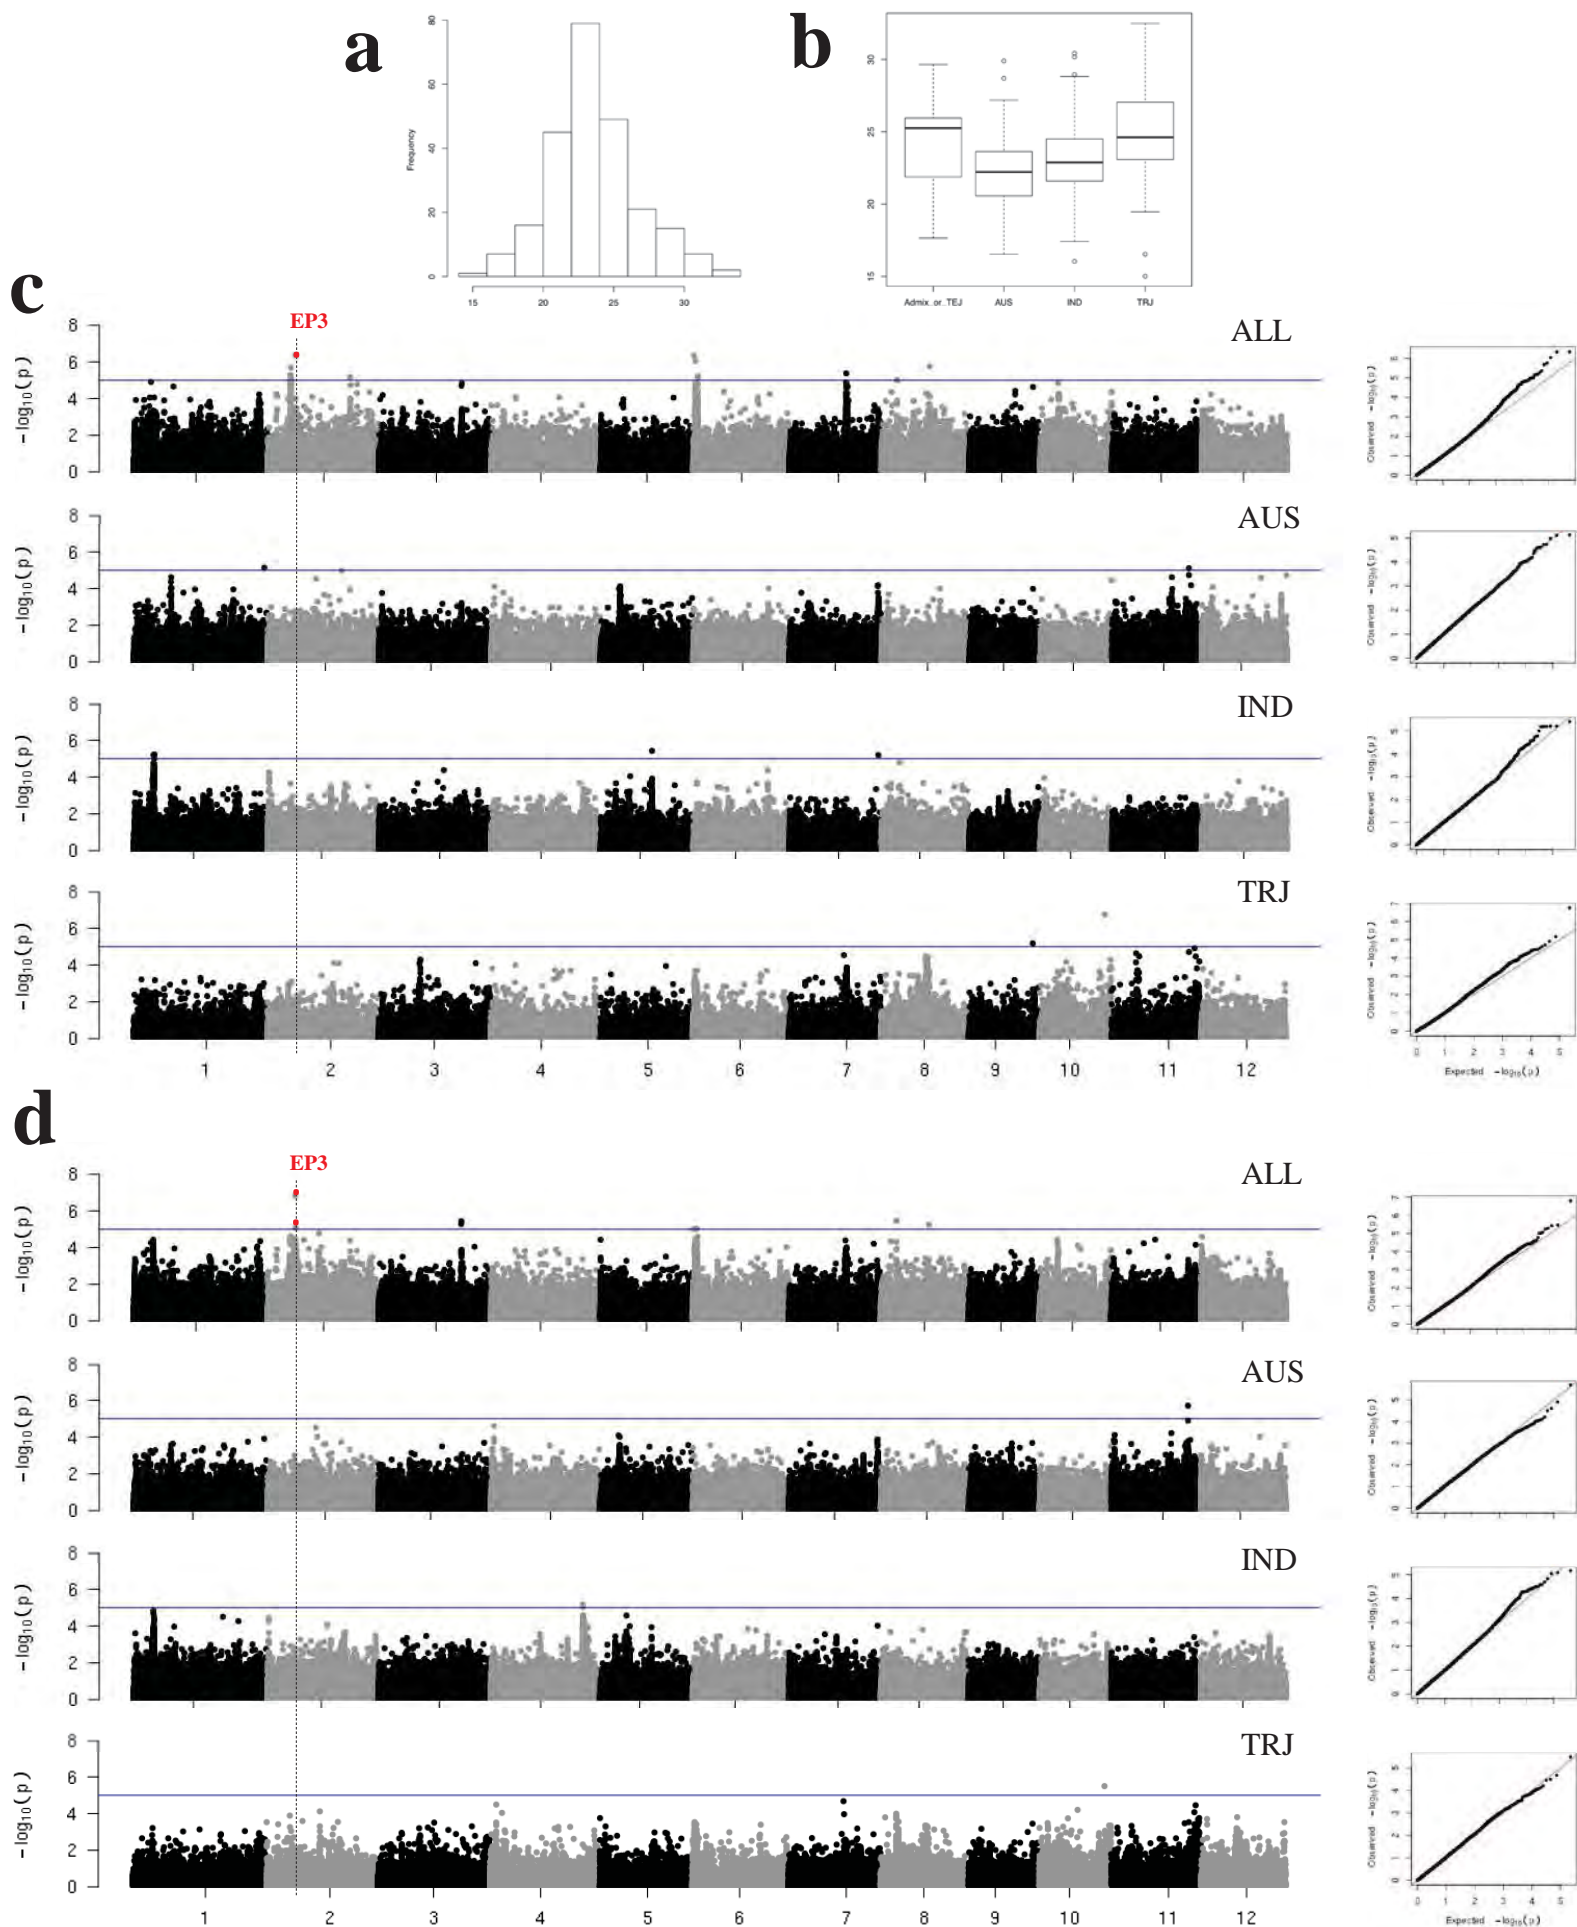

**Supplementary Figure 9. Summary of GWAS results for Panicle Length (cm).** (a, b) Phenotypic distributions. (c) Mixed model controlling for subpopulation structure across all varieties (ALL) and within individual subpopulations (AUS = *aus*, IND = *indica*, TRJ = *tropical japonica*). (d) Mixed model with heading date as a covariate.



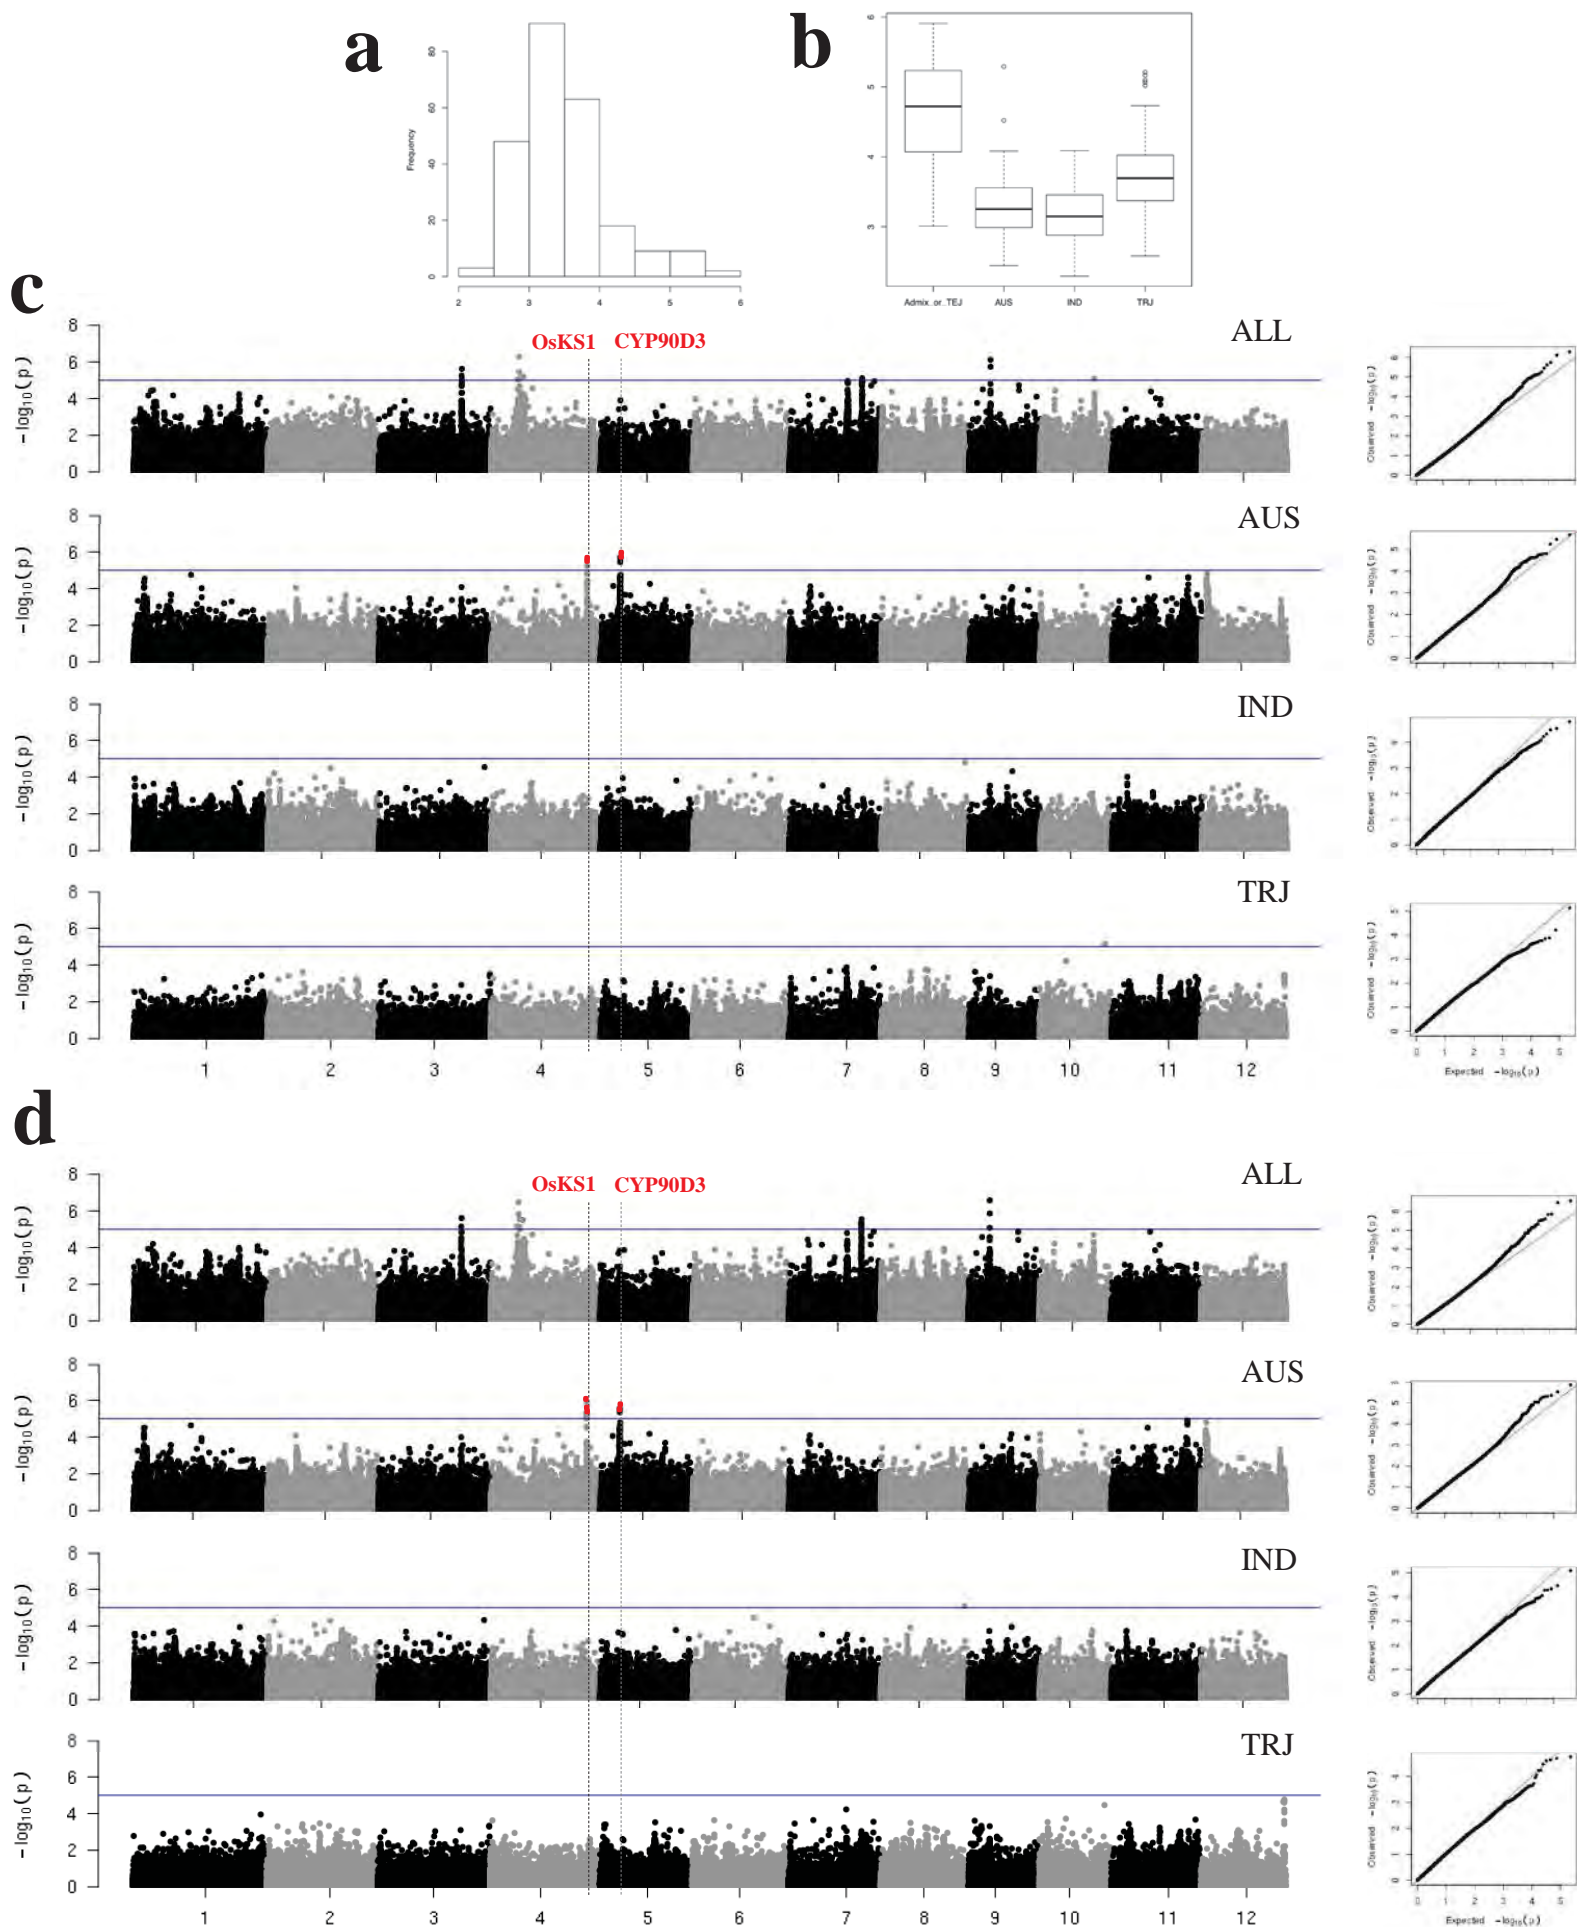

**Supplementary Figure 10. Summary of GWAS results for Maximum Internode Length (cm).** (a, b) Phenotypic distributions. (c) Mixed model controlling for subpopulation structure across all varieties (ALL) and within individual subpopulations (AUS = *aus*, IND = *indica*, TRJ = *tropical japonica*). (d) Mixed model with heading date as a covariate.



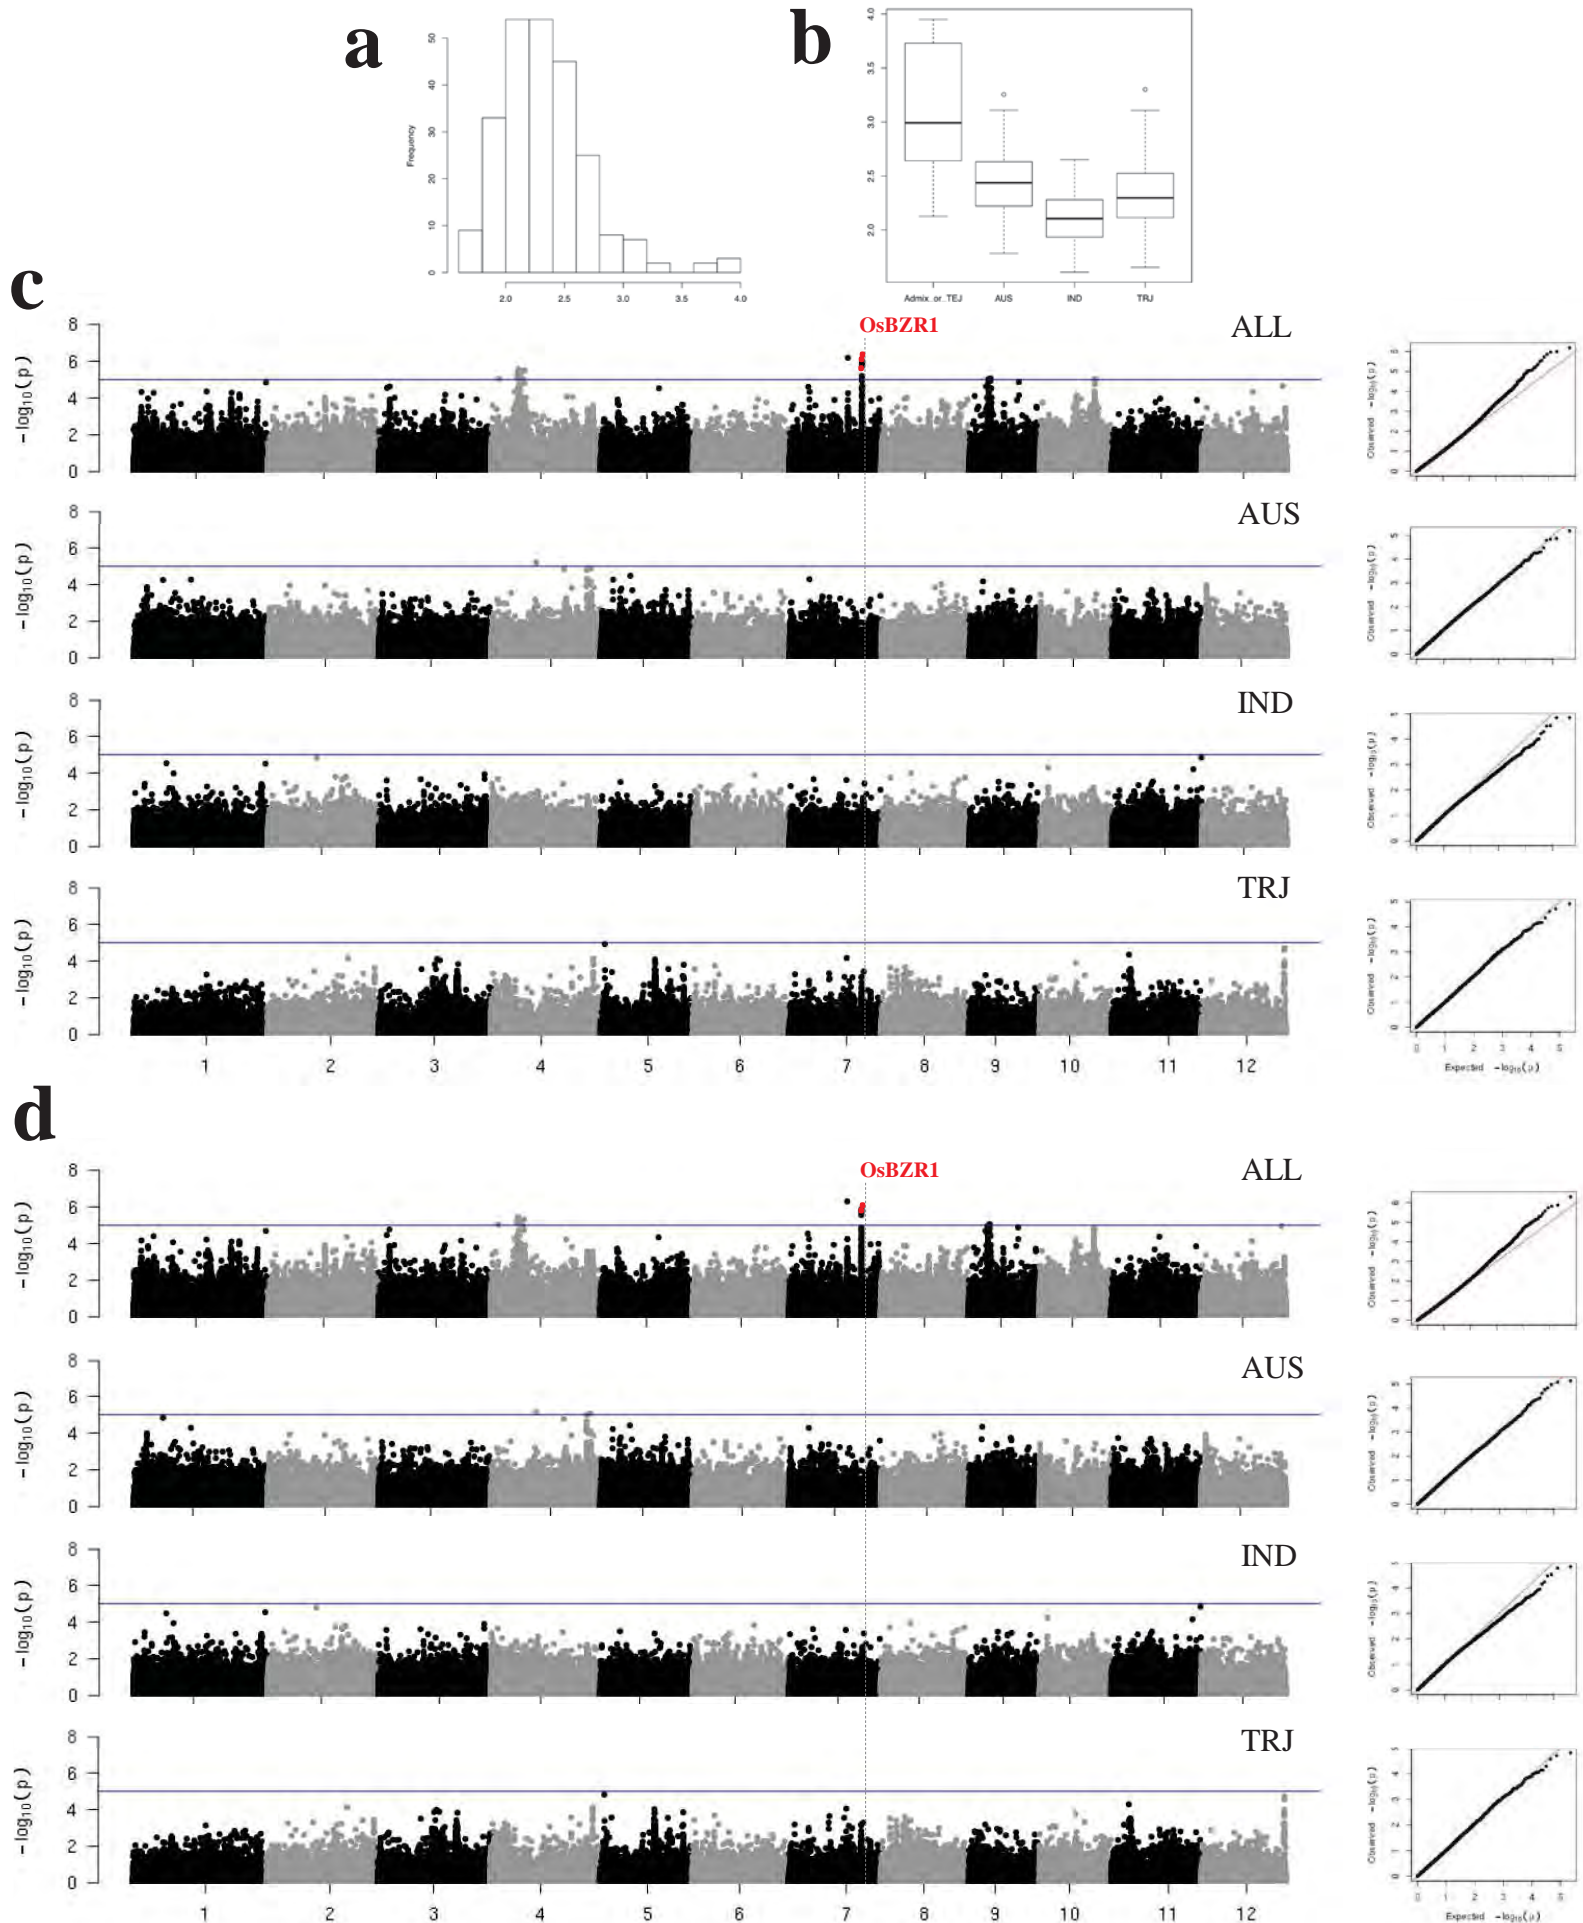

**Supplementary Figure 11. Summary of GWAS results for Average Internode Length (cm).** (a, b) Phenotypic distributions. (c) Mixed model controlling for subpopulation structure across all varieties (ALL) and within individual subpopulations (AUS = *aus*, IND = *indica*, TRJ = *tropical japonica*). (d) Mixed model with heading date as a covariate.

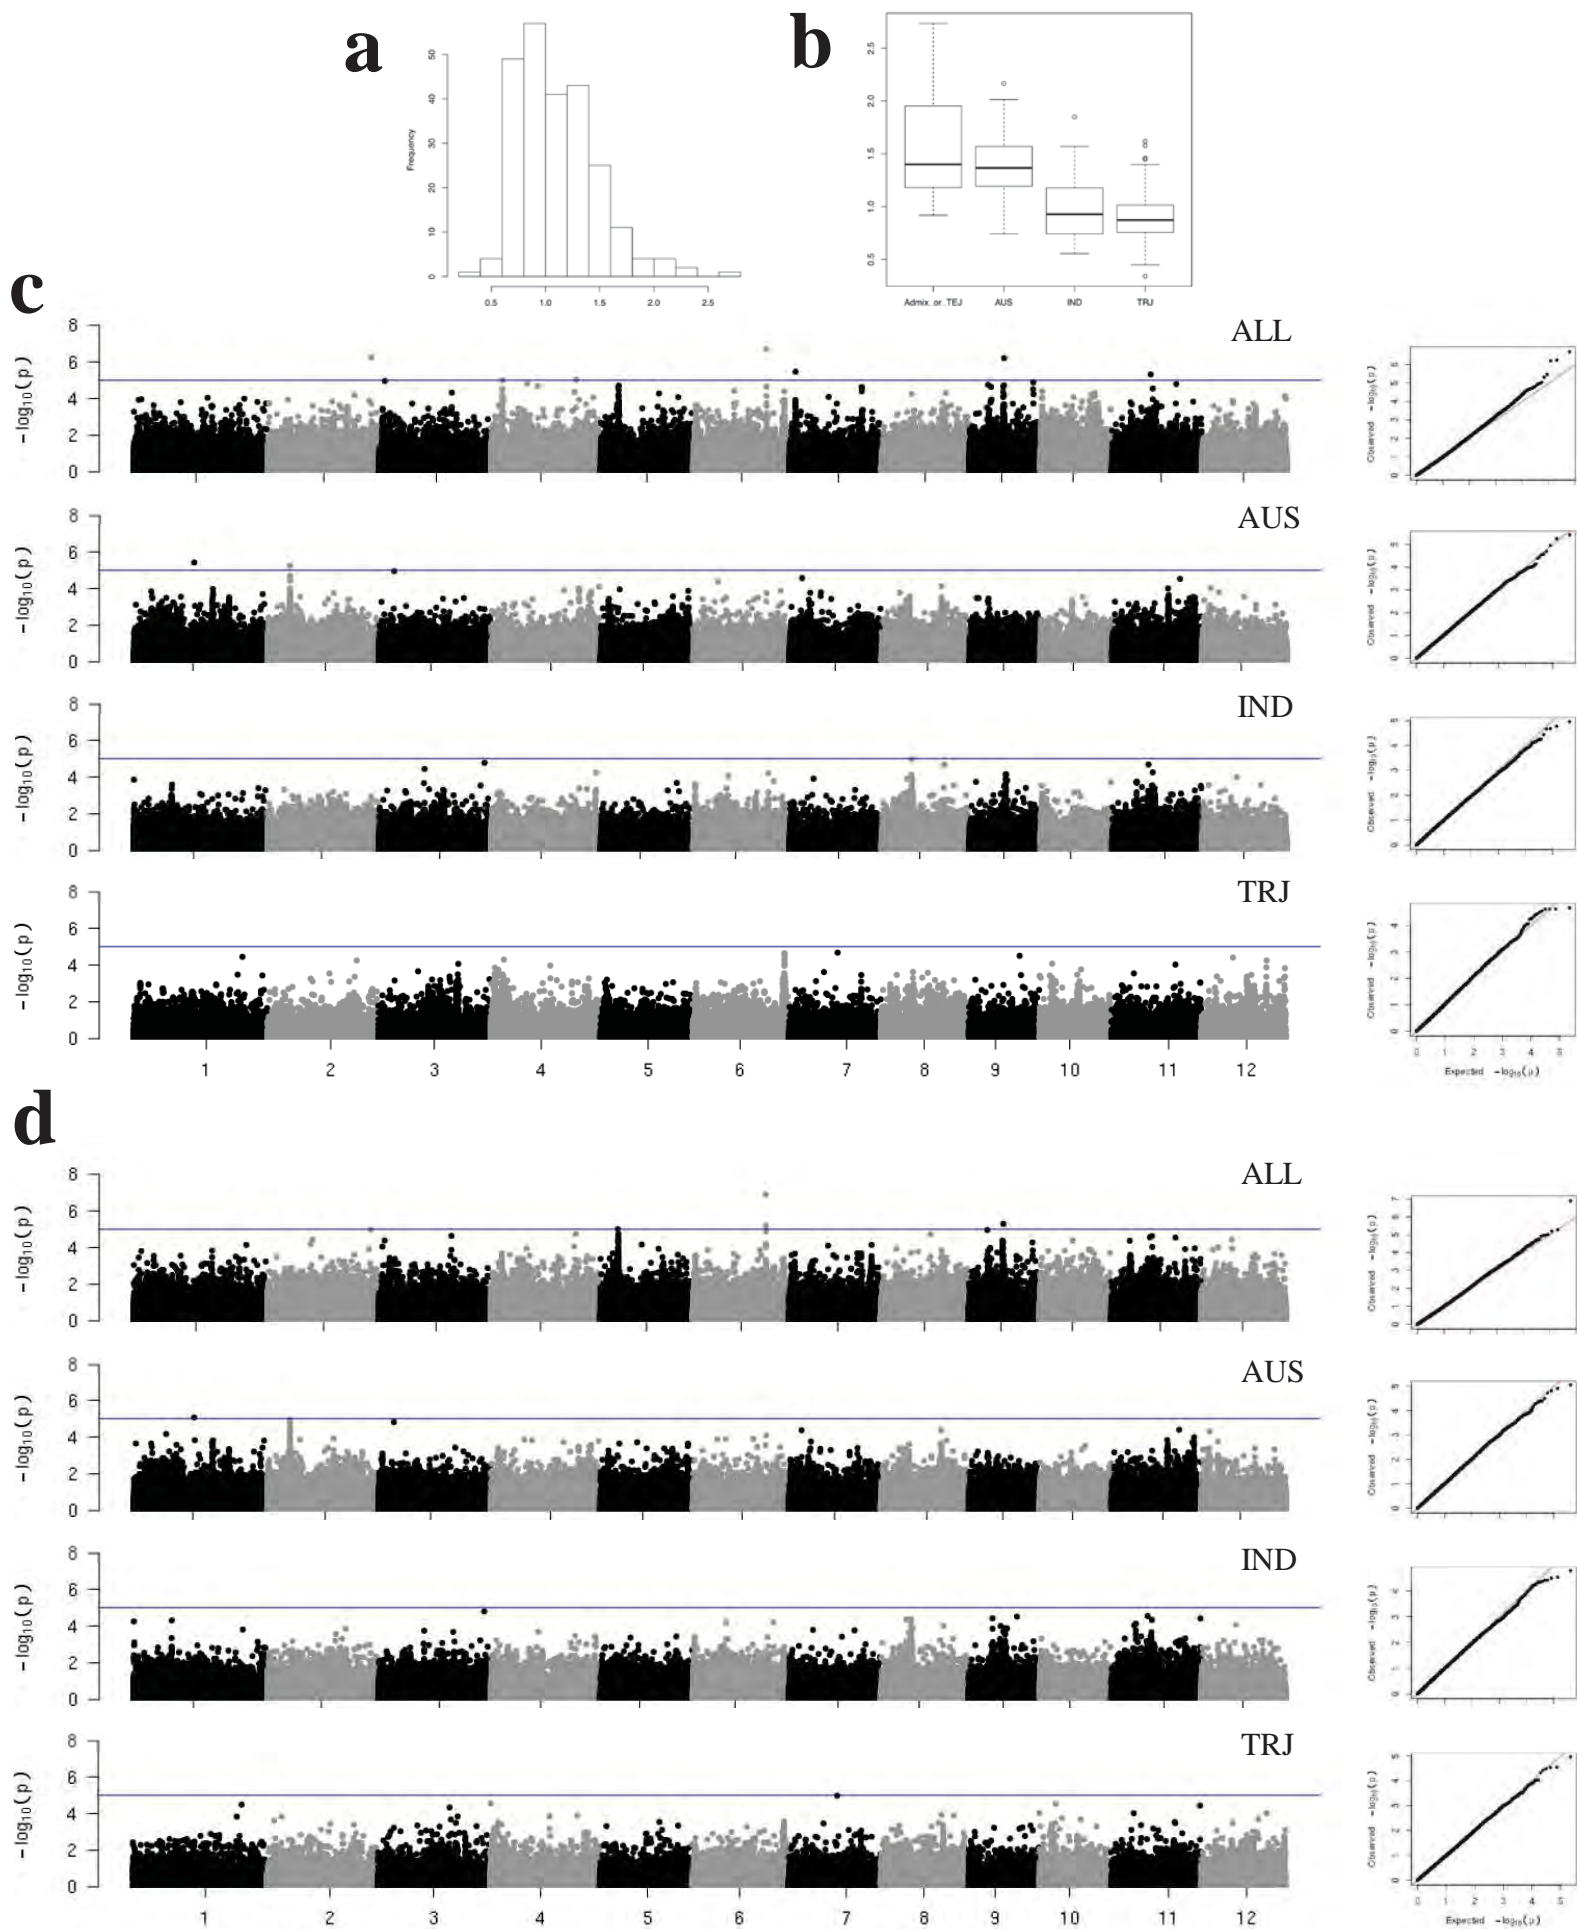

**Supplementary Figure 12. Summary of GWAS results for Minimum Internode Length (cm).** (a, b) Phenotypic distributions. (c) Mixed model controlling for subpopulation structure across all varieties (ALL) and within individual subpopulations (AUS = *aus*, IND = *indica*, TRJ = *tropical japonica*). (d) Mixed model with heading date as a covariate.



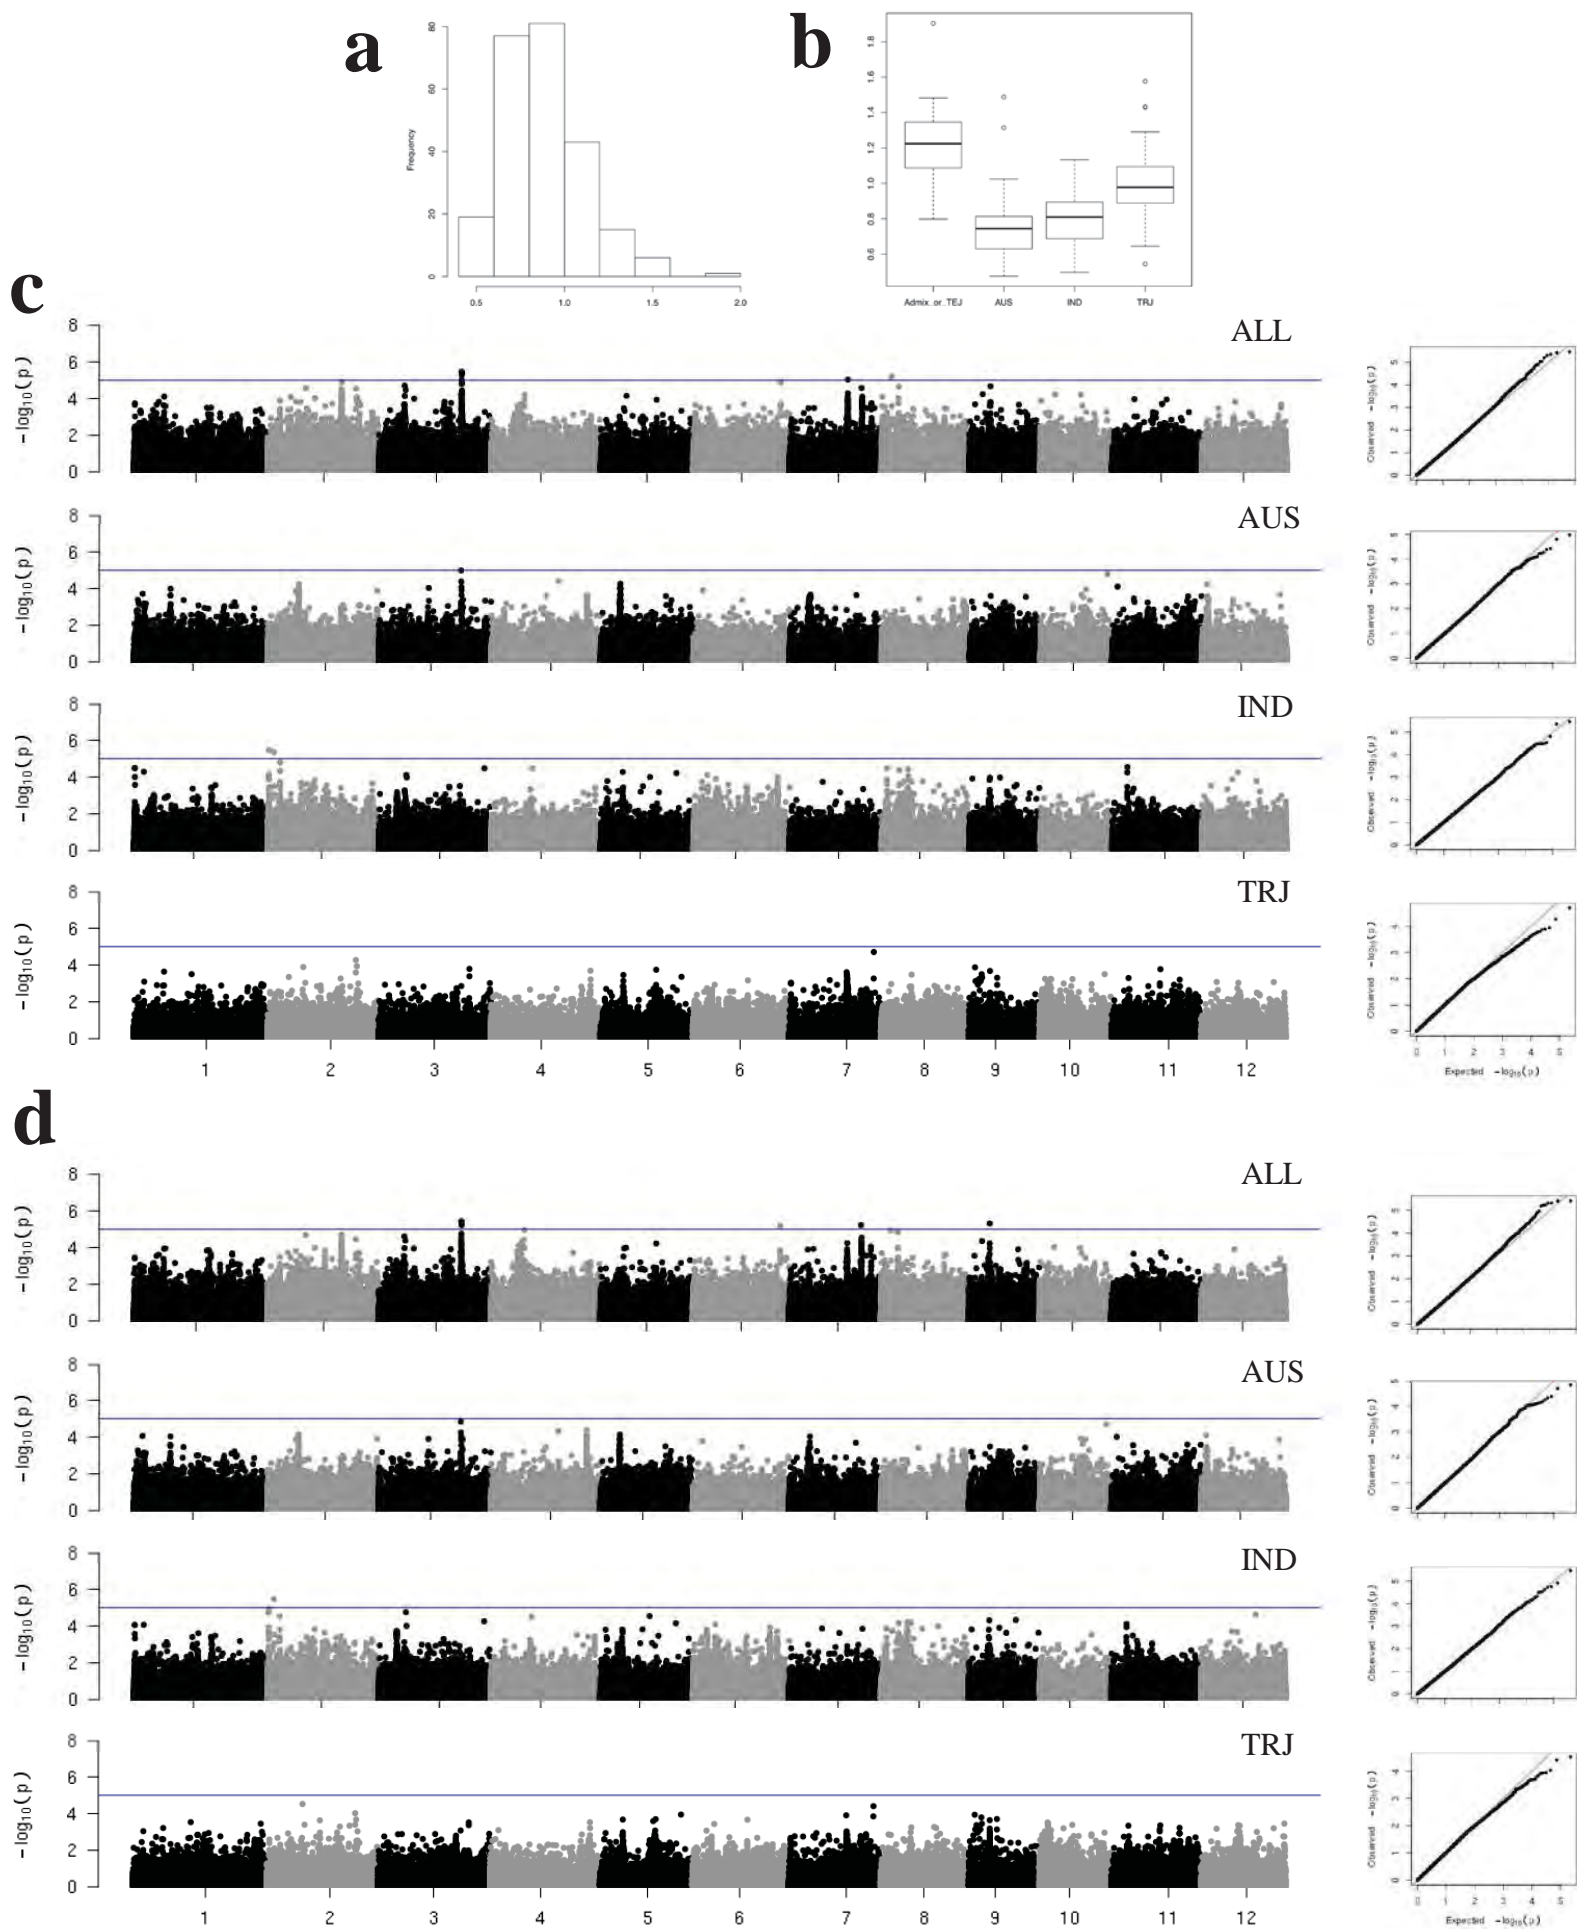

**Supplementary Figure 13. Summary of GWAS results for Internode Length Standard Deviation. (a, b) Phenotypic distributions. (c) Mixed model controlling for subpopulation structure across all varieties (ALL) and within individual subpopulations (AUS = *aus*, IND = *indica*, TRJ = *tropical japonica*). (d) Mixed model with heading date as a covariate.**

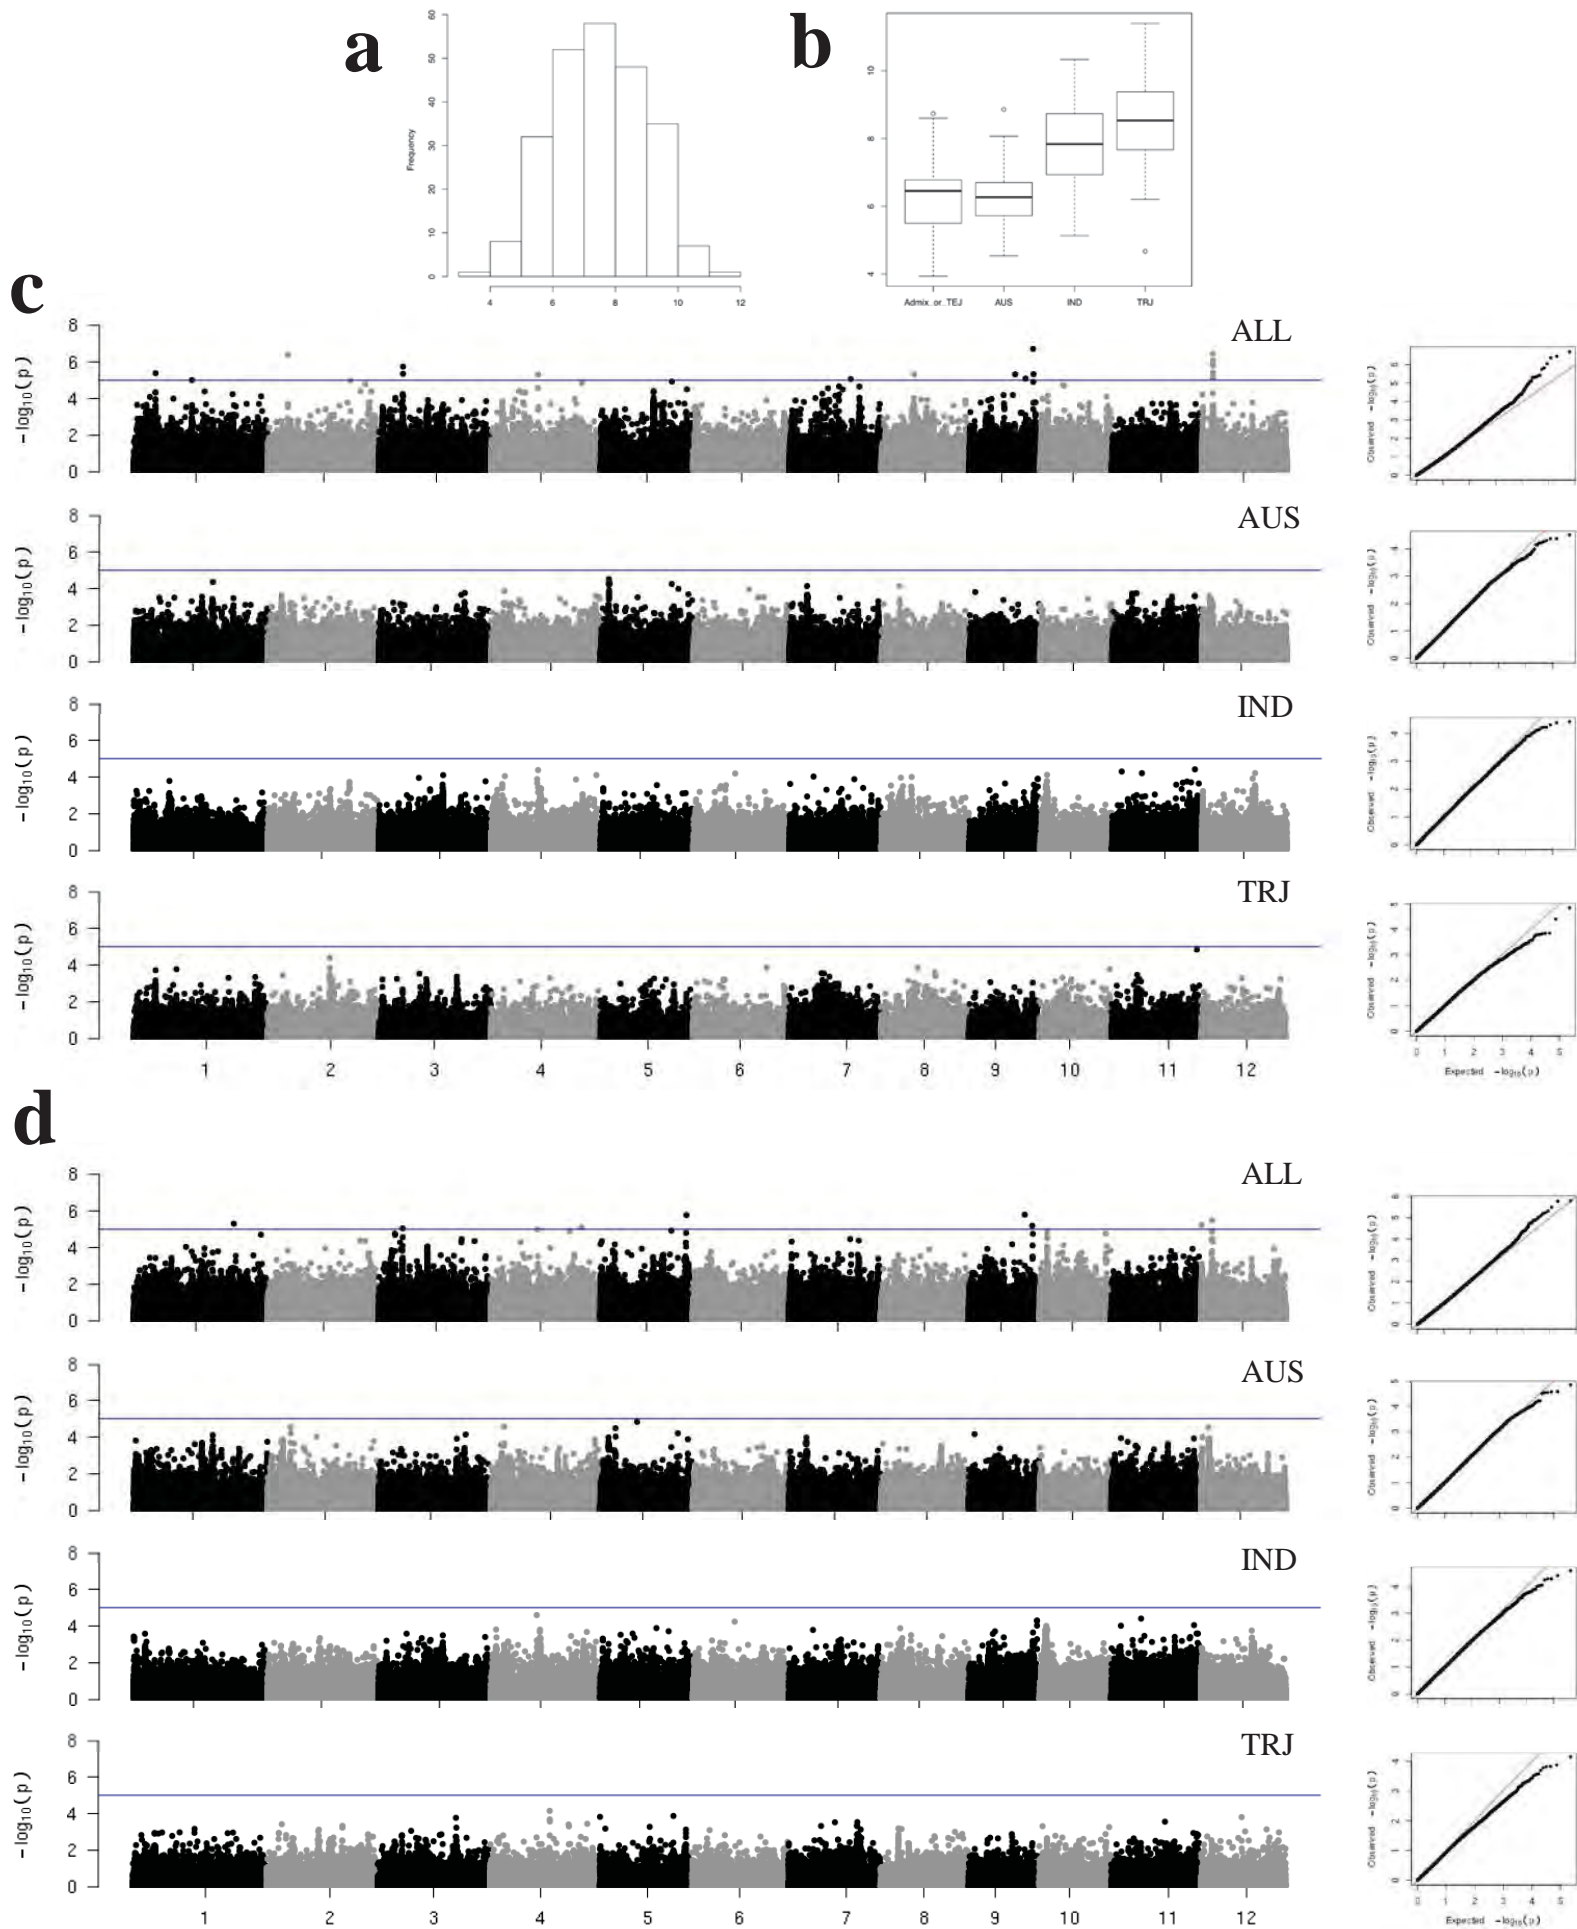

**Supplementary Figure 14. Summary of GWAS results for Internode Number. (a, b) Phenotypic distributions. (c) Mixed model controlling for subpopulation structure across all varieties (ALL) and within individual subpopulations (AUS = *aus*, IND = *indica*, TRJ = *tropical japonica*). (d) Mixed model with heading date as a covariate.**

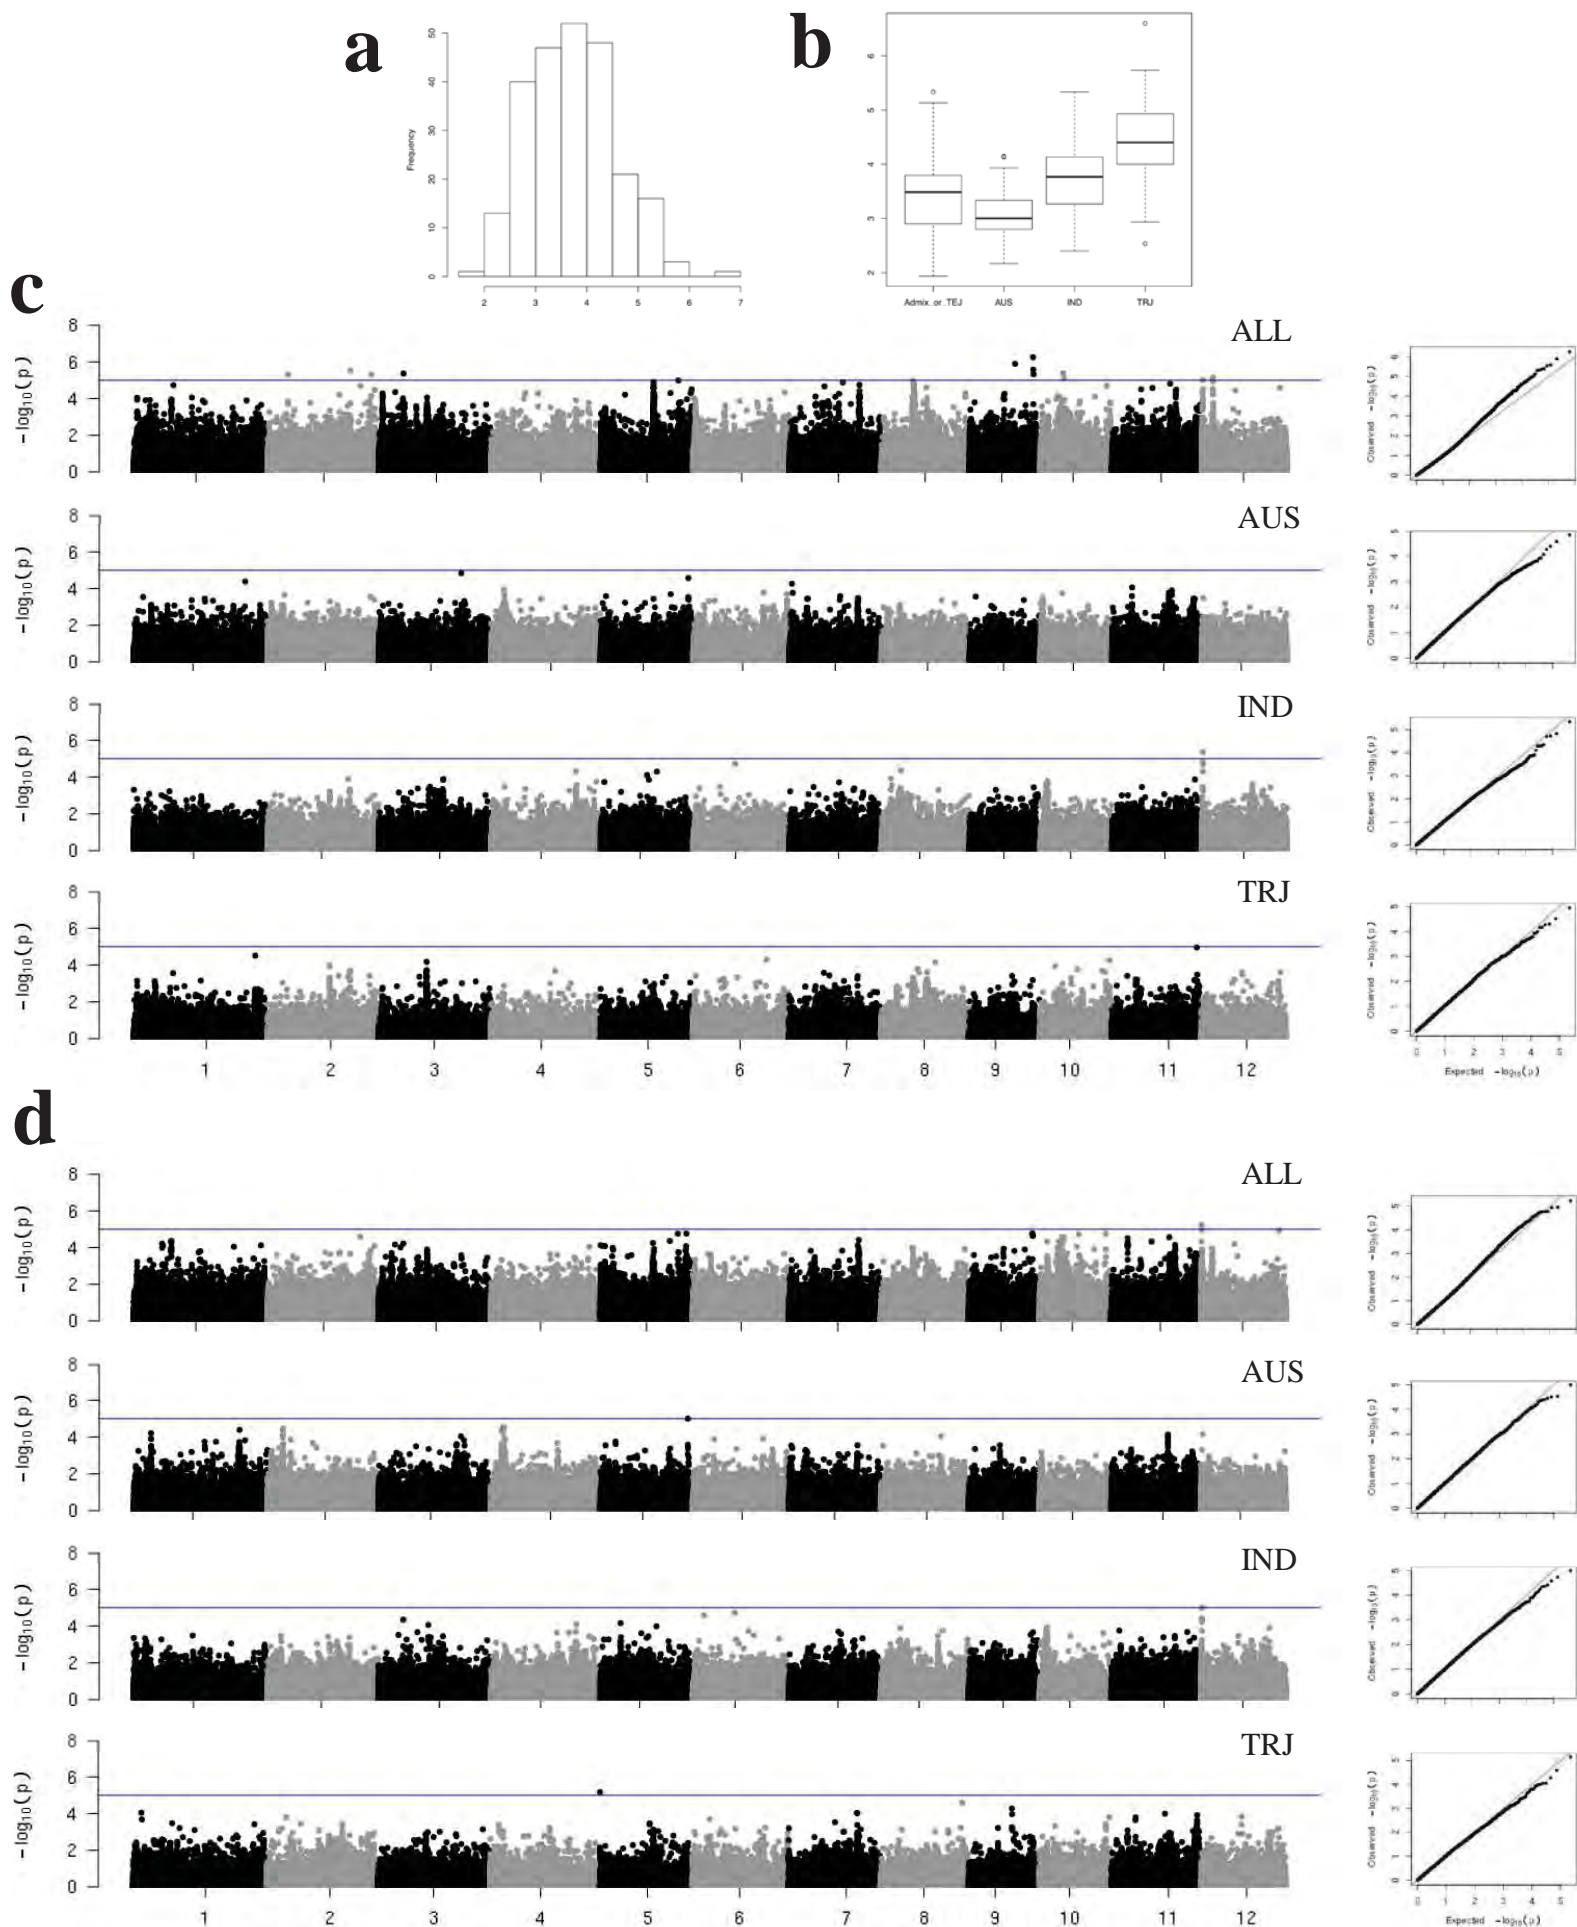

**Supplementary Figure 15. Summary of GWAS results for Internode Number in the Upper Half of the Panicle. (a, b)** Phenotypic distributions. **(c)** Mixed model controlling for subpopulation structure across all varieties (ALL) and within individual subpopulations (AUS = *aus*, IND = *indica*, TRJ = *tropical japonica*). **(d)** Mixed model with heading date as a covariate.



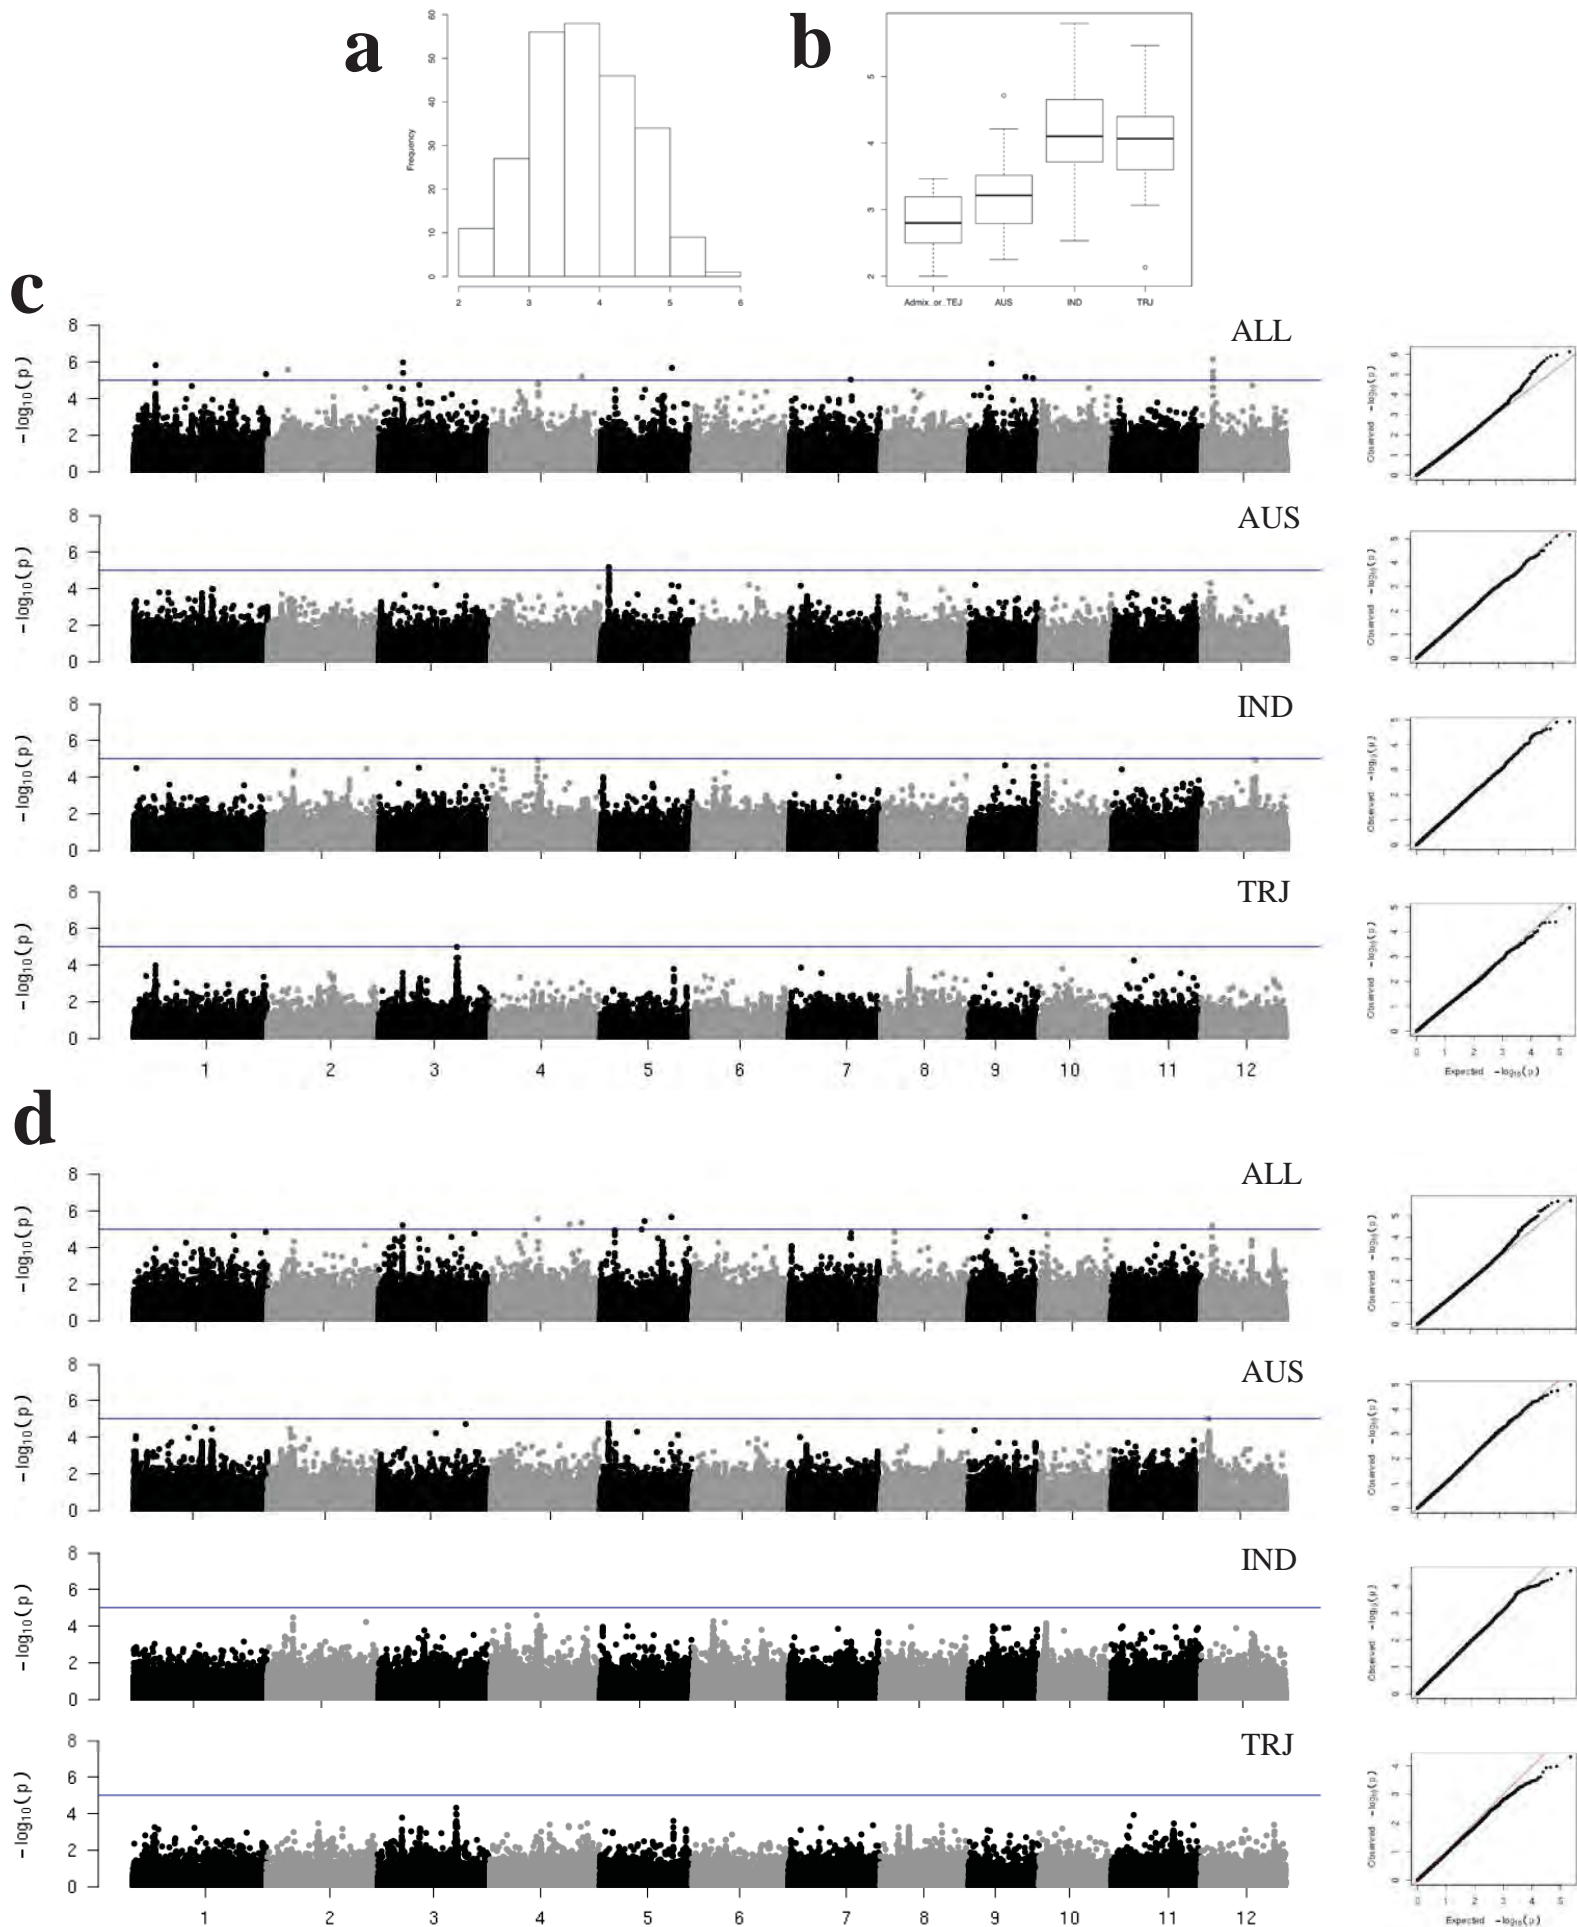

**Supplementary Figure 16. Summary of GWAS results for Internode Number in the Lower Half of the Panicle. (a, b)** Phenotypic distributions. **(c)** Mixed model controlling for subpopulation structure across all varieties (ALL) and within individual subpopulations (AUS = *aus*, IND = *indica*, TRJ = *tropical japonica*). **(d)** Mixed model with heading date as a covariate.

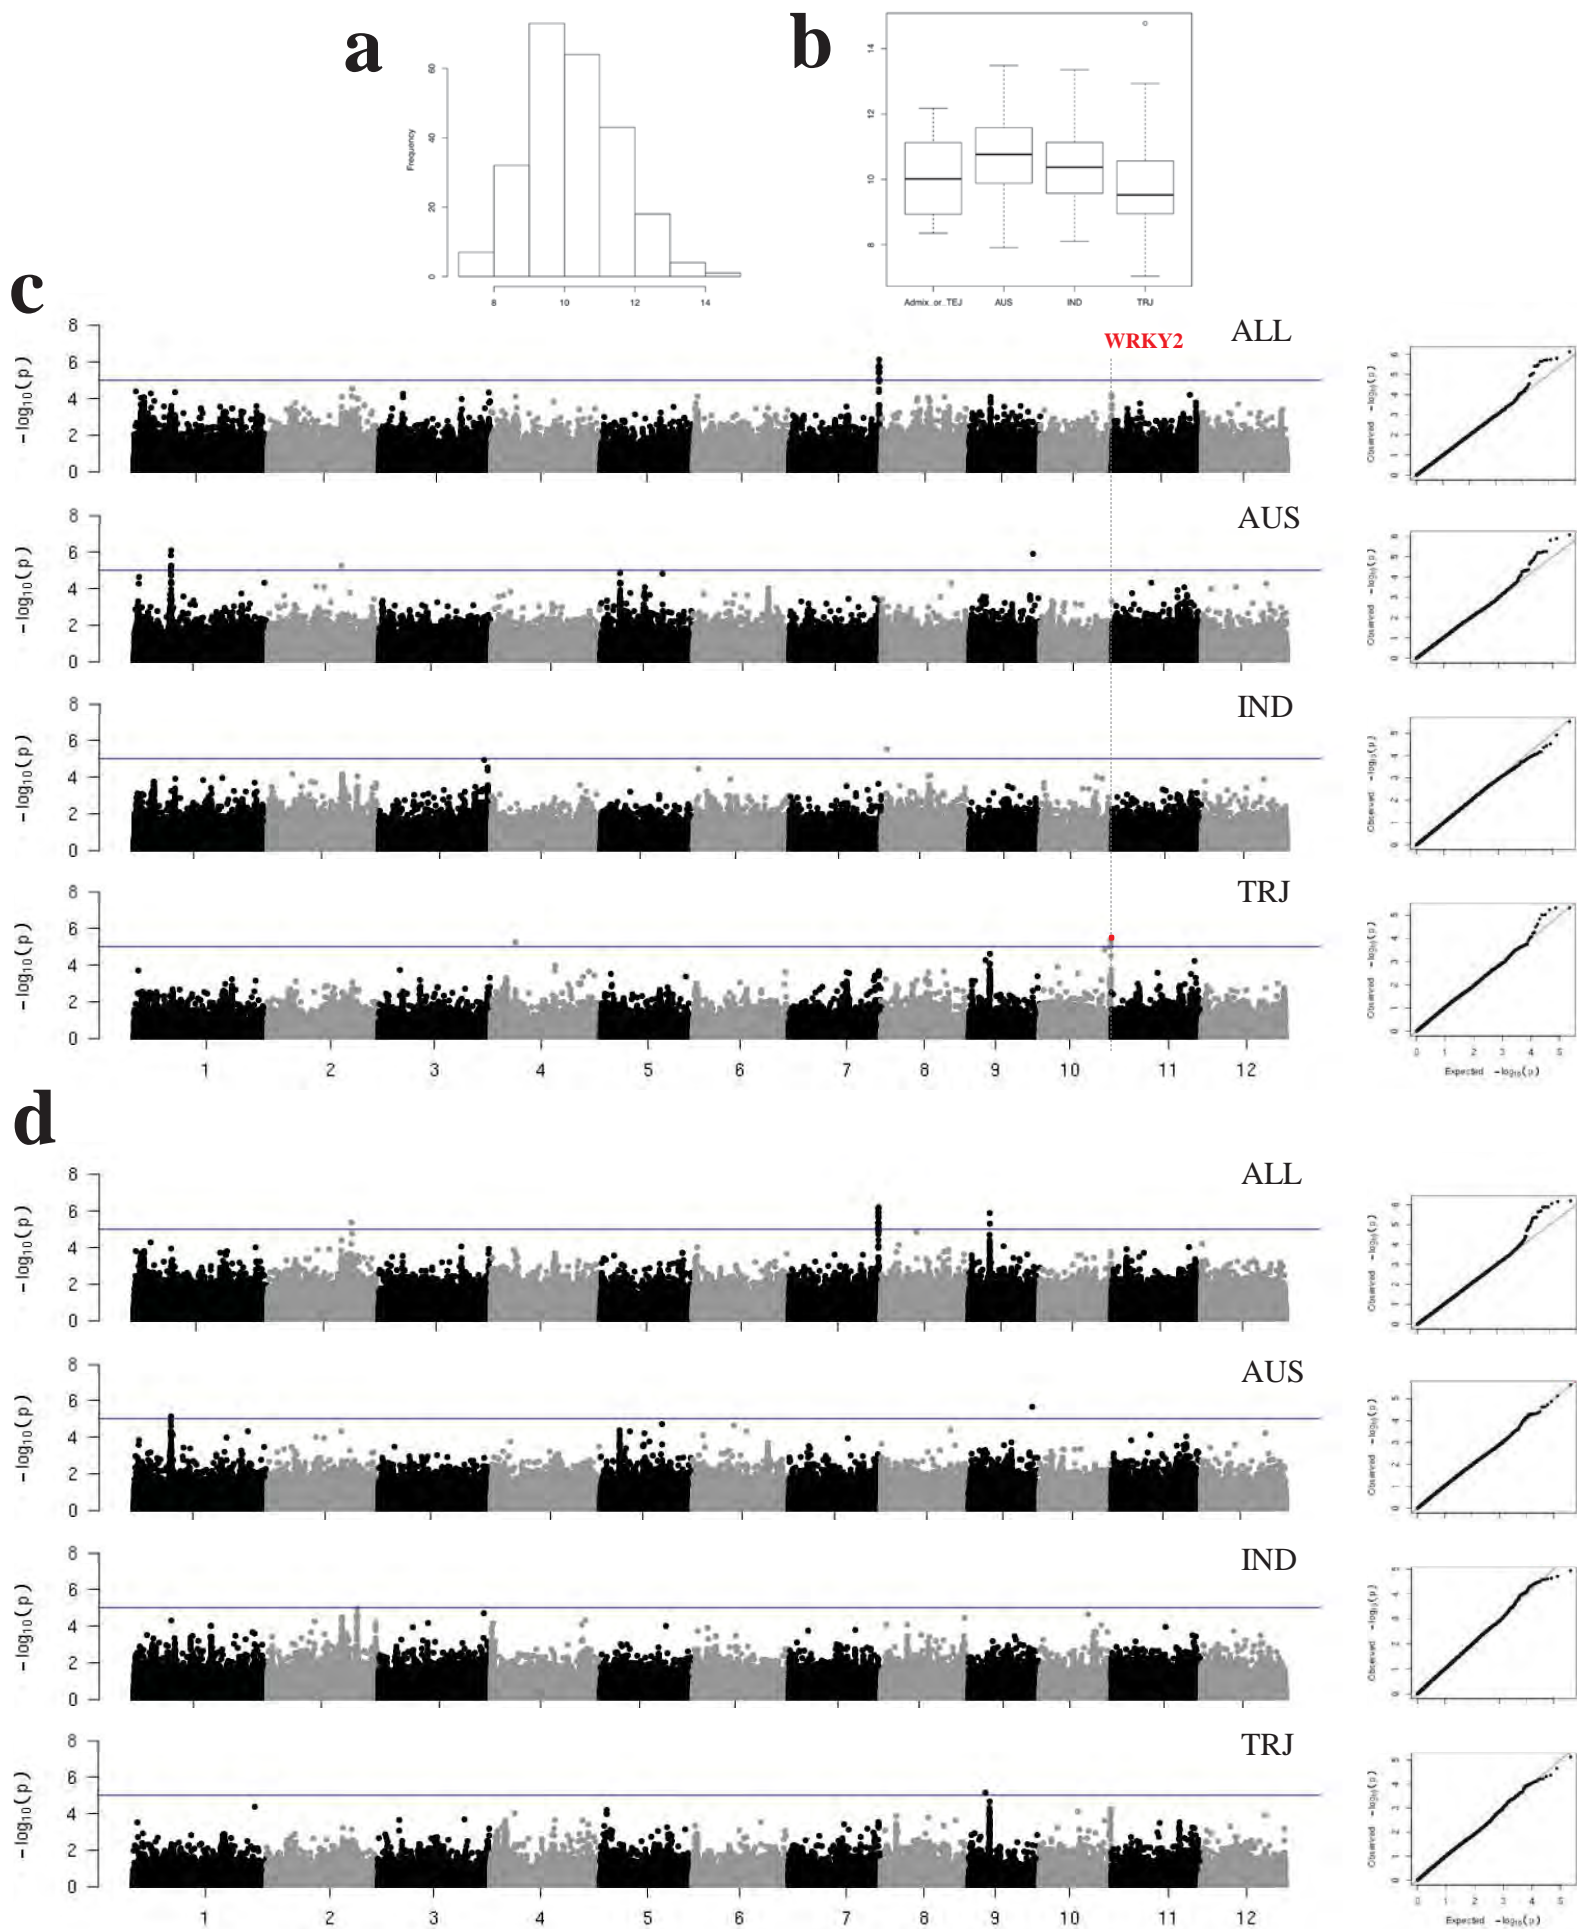

**Supplementary Figure 17. Summary of GWAS results for Primary Branch Length (cm).** (a, b) Phenotypic distributions. (c) Mixed model controlling for subpopulation structure across all varieties (ALL) and within individual subpopulations (AUS = *aus*, IND = *indica*, TRJ = *tropical japonica*). (d) Mixed model with heading date as a covariate.



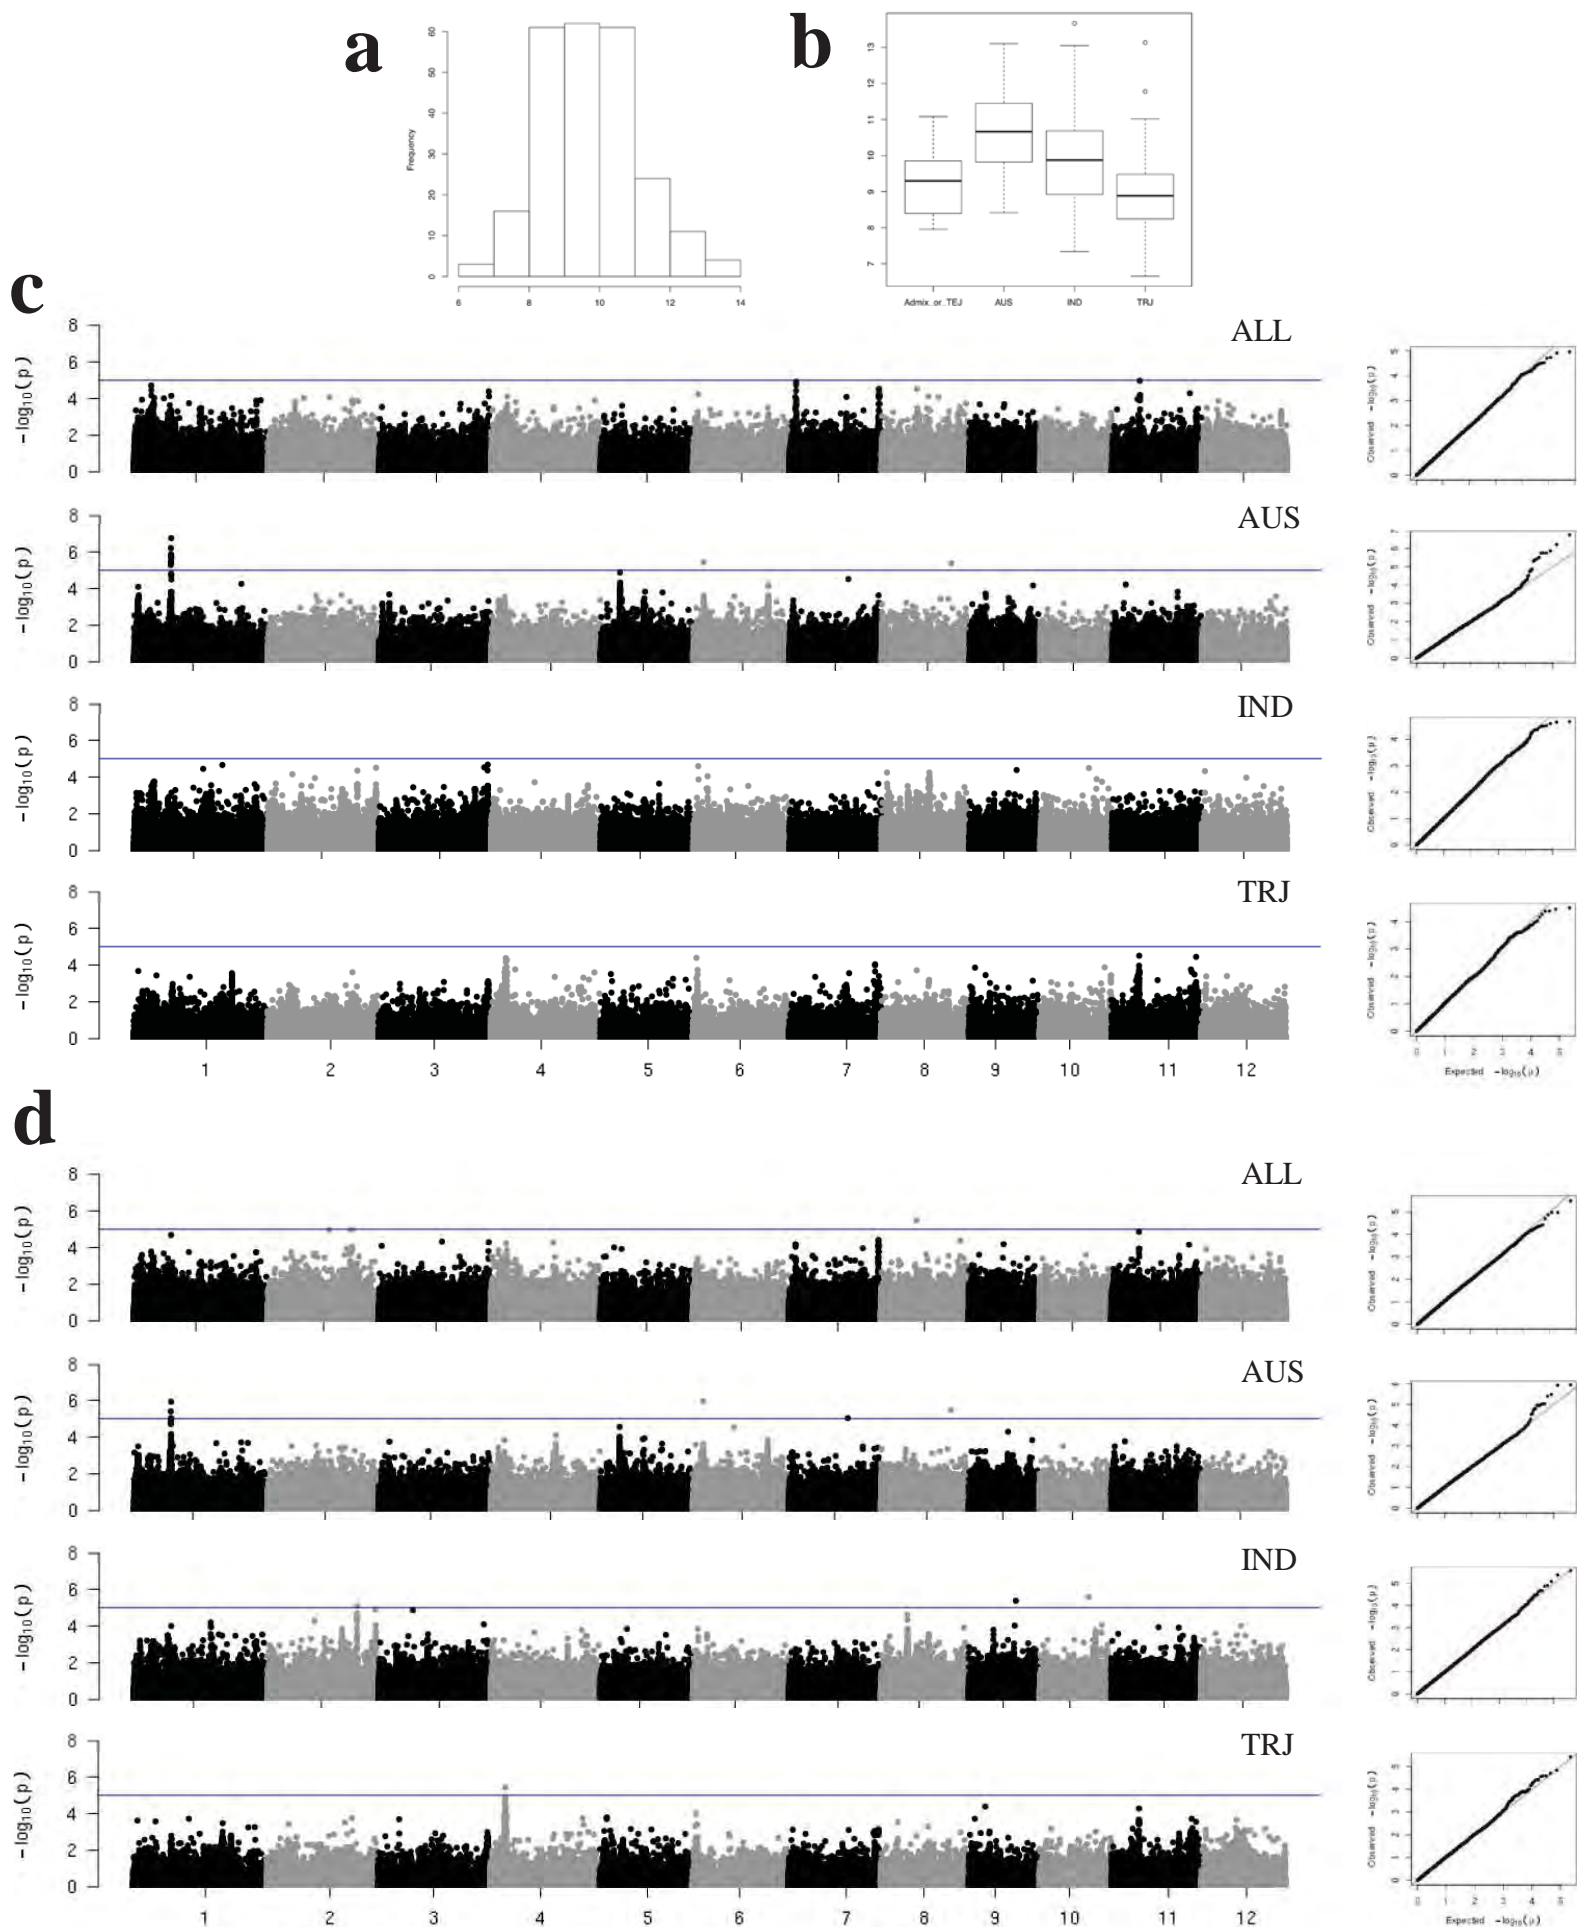

**Supplementary Figure 18. Summary of GWAS results for Primary Branch Length in the Upper Half of the Panicle (cm).** (a, b) Phenotypic distributions. (c) Mixed model controlling for subpopulation structure across all varieties (ALL) and within individual subpopulations (AUS = *aus*, IND = *indica*, TRJ = *tropical japonica*). (d) Mixed model with heading date as a covariate.



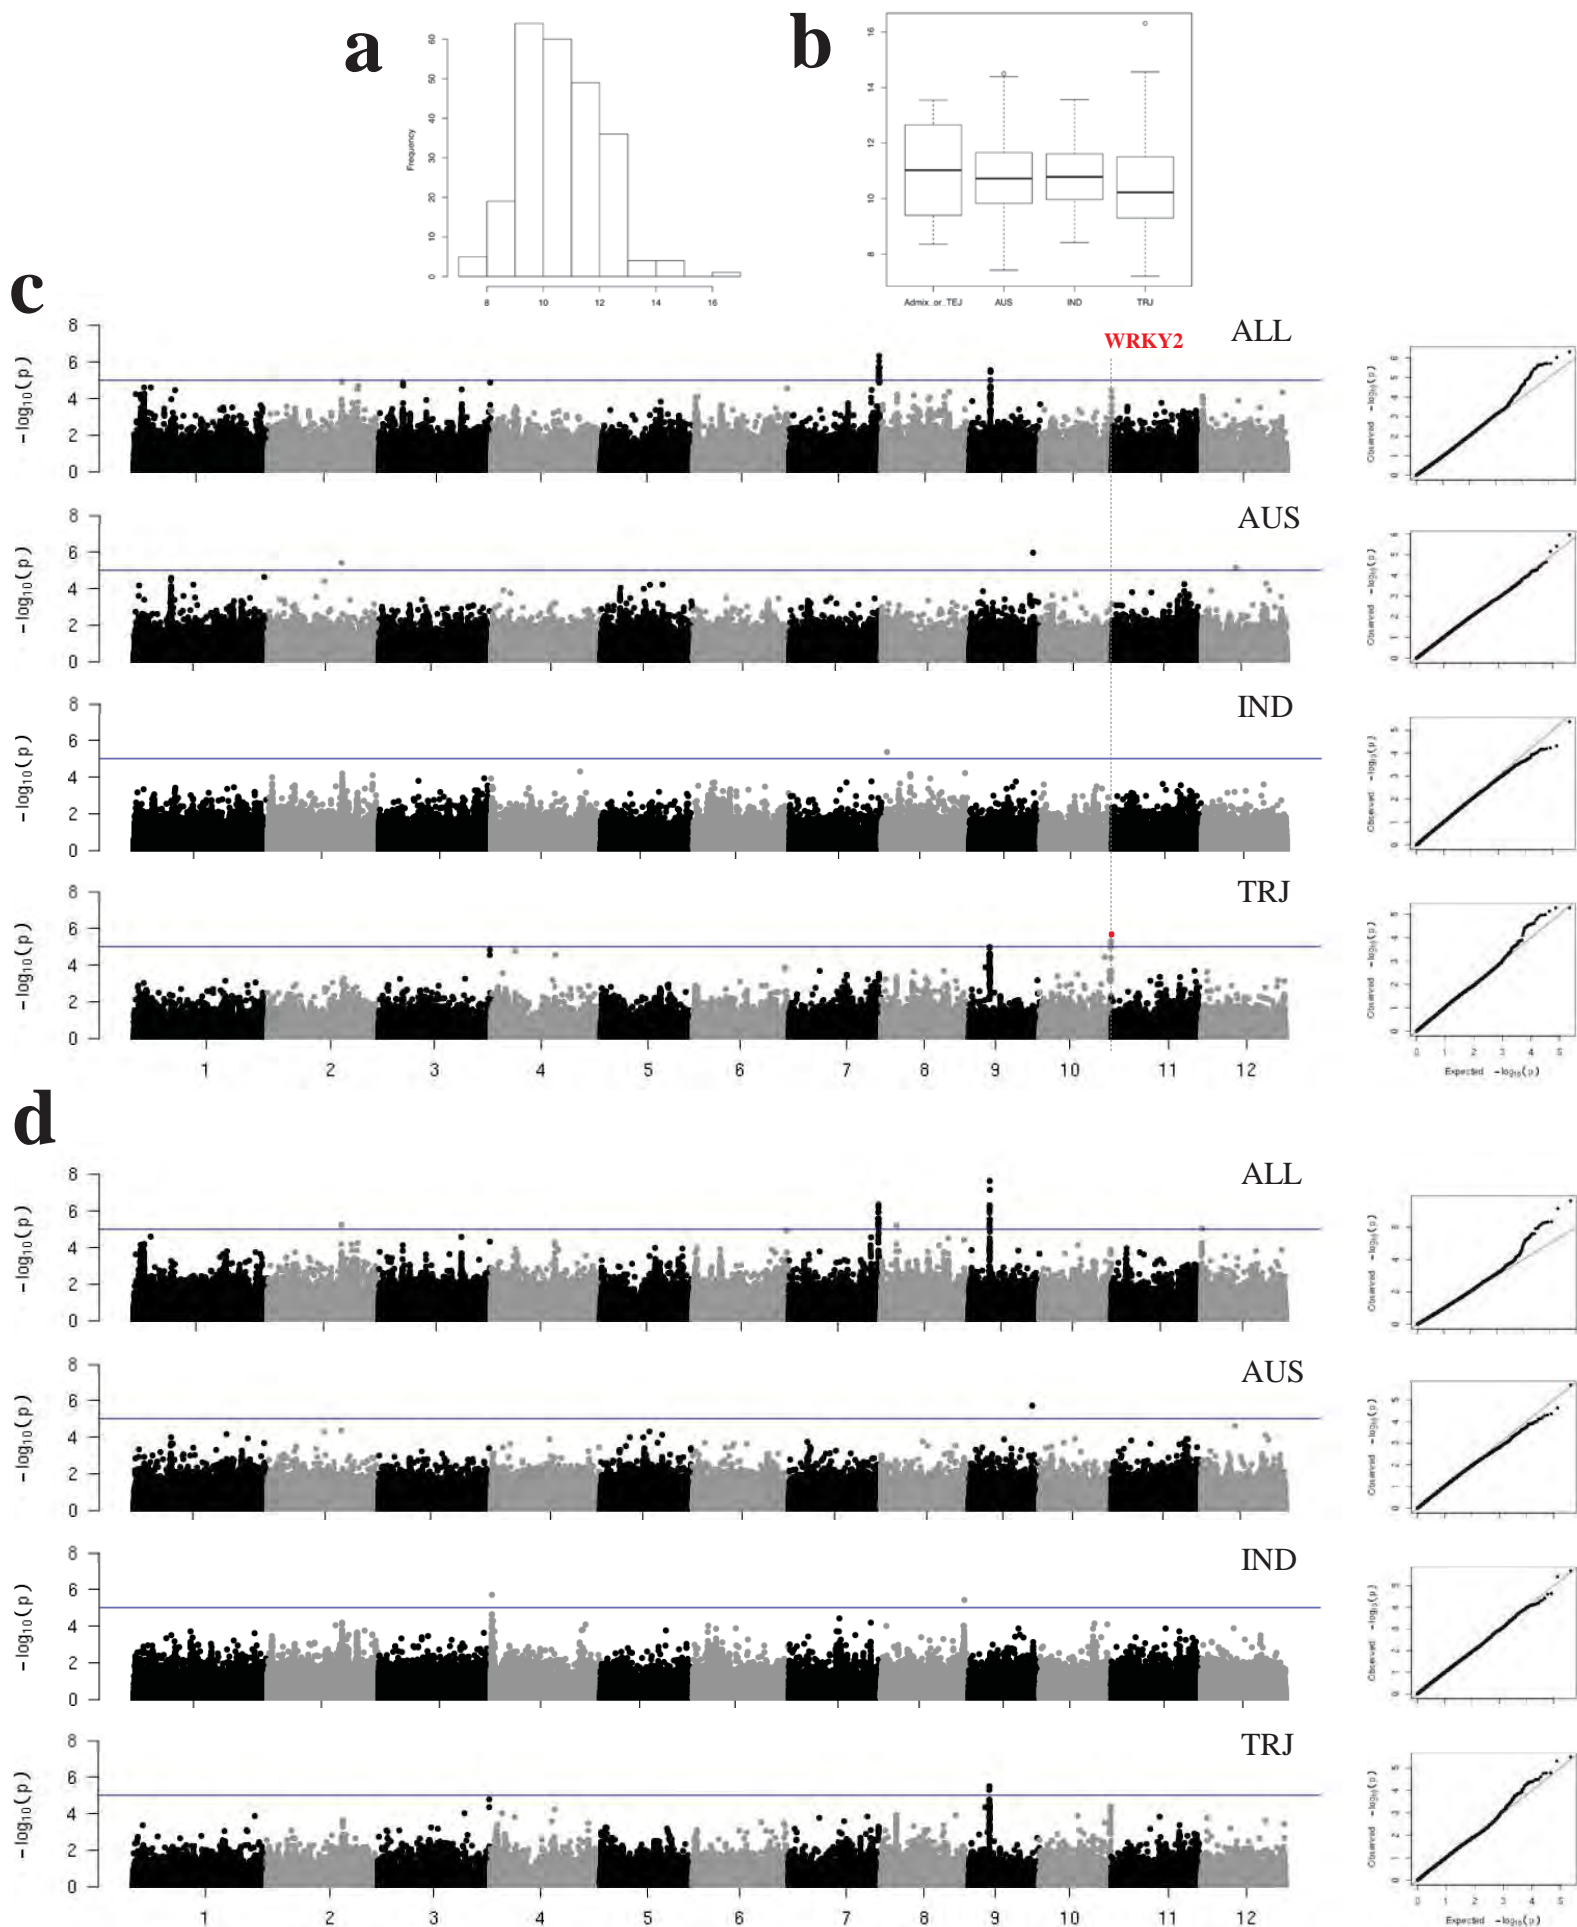

**Supplementary Figure 19. Summary of GWAS results for Primary Branch Length in the Lower Half of the Panicle (cm).** (a, b) Phenotypic distributions. (c) Mixed model controlling for subpopulation structure across all varieties (ALL) and within individual subpopulations (AUS = *aus*, IND = *indica*, TRJ = *tropical japonica*). (d) Mixed model with heading date as a covariate.

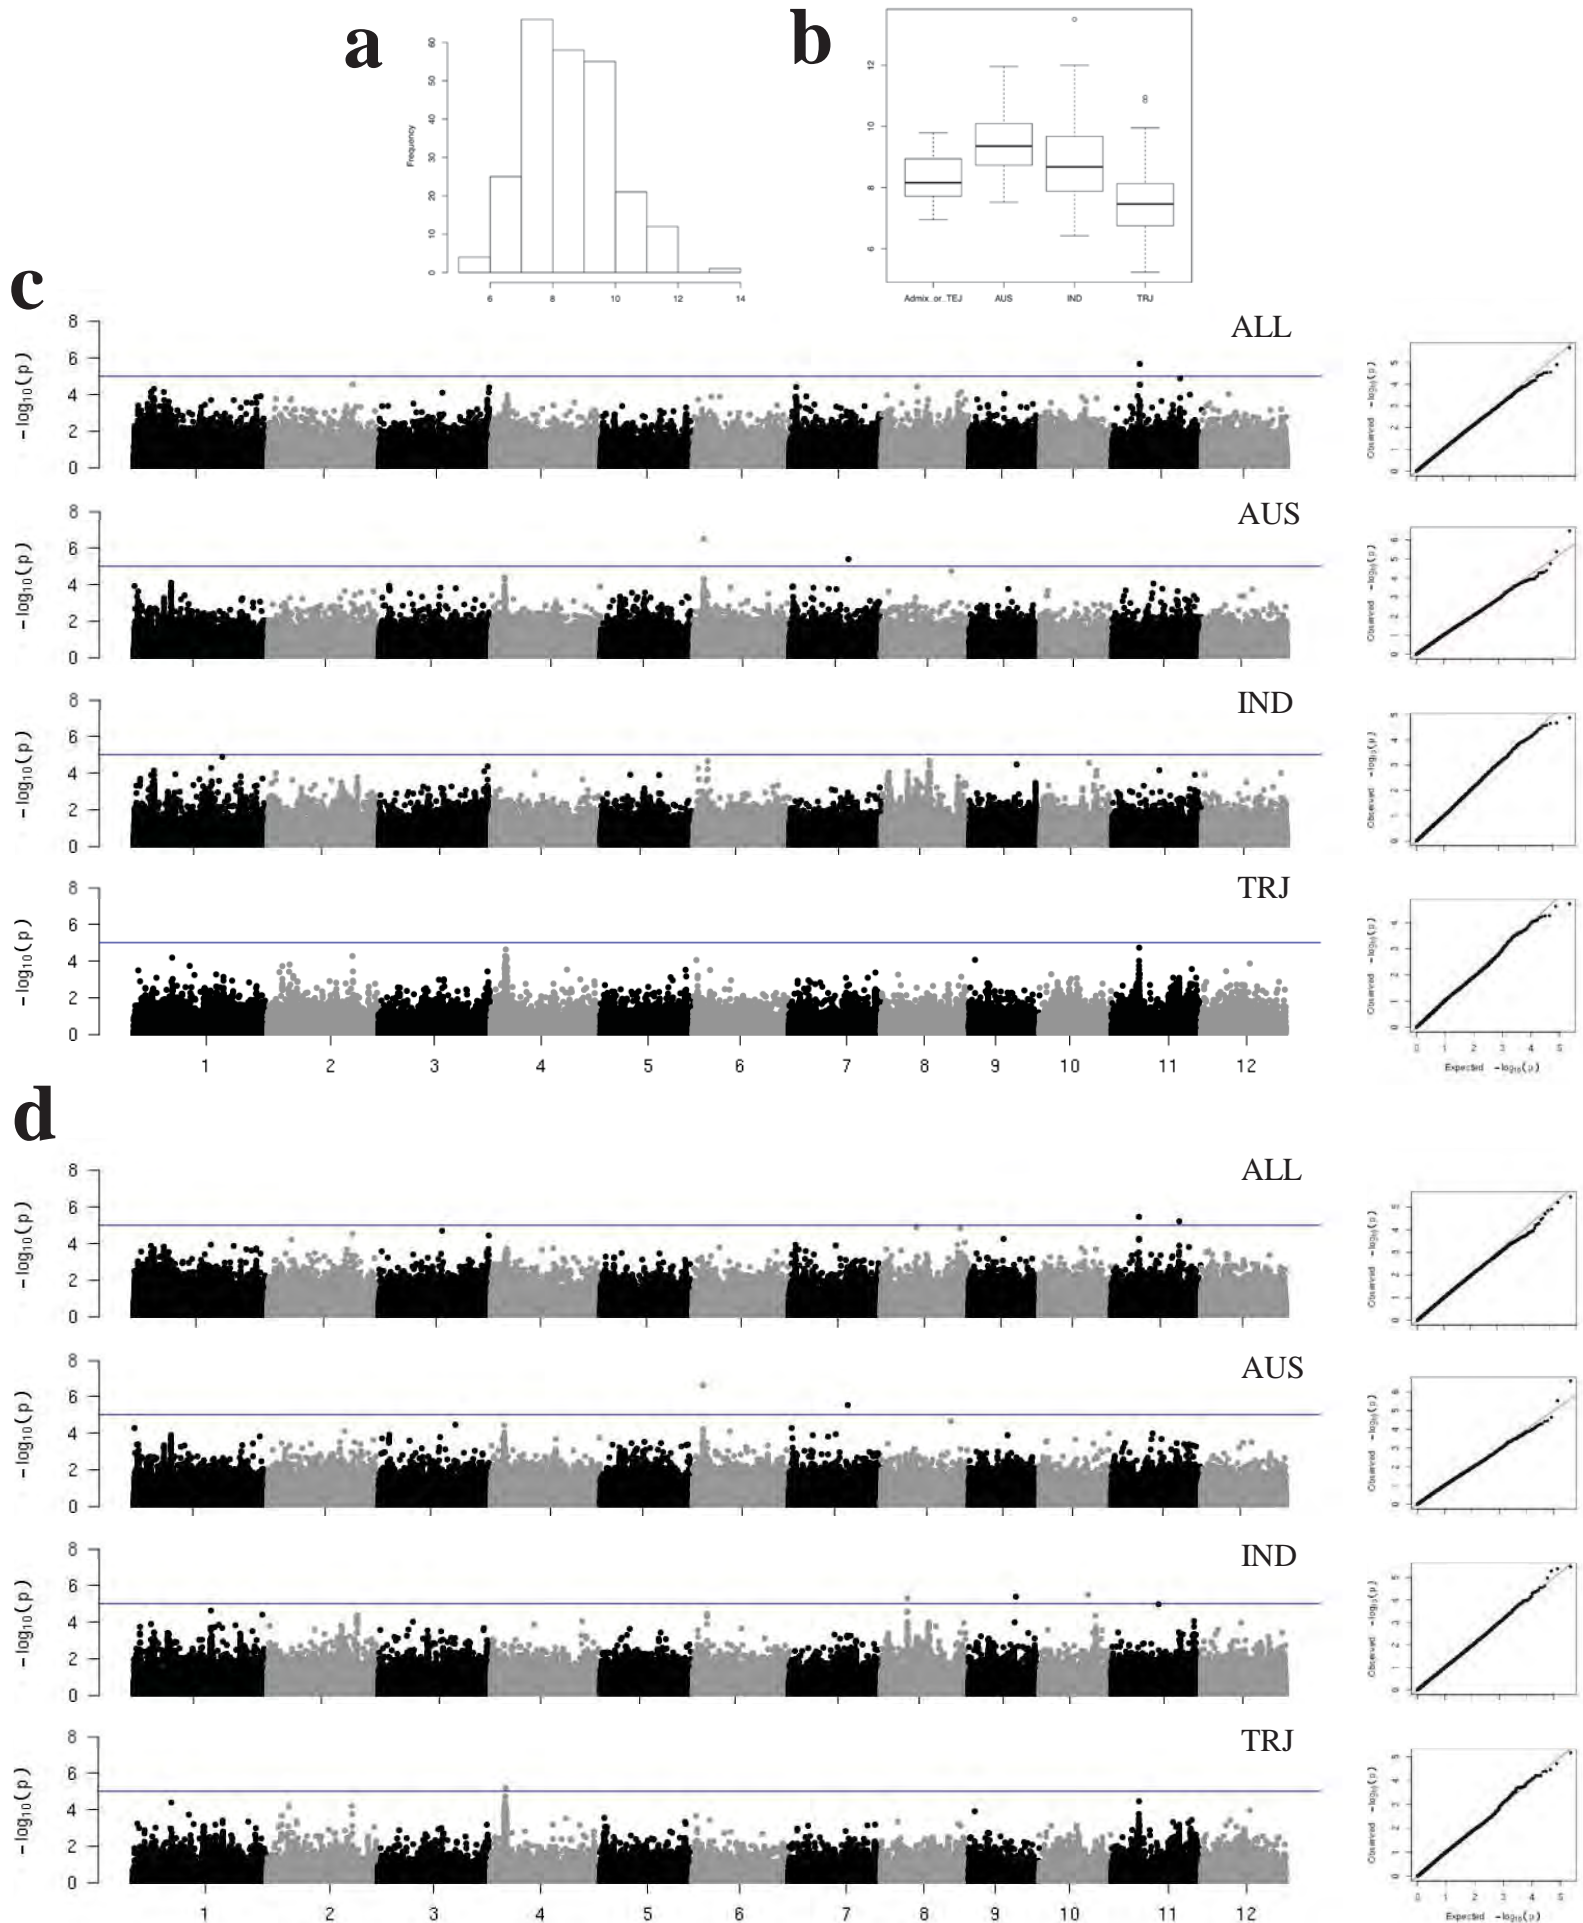

**Supplementary Figure 20. Summary of GWAS results for Tip Branch Length (cm).** (a, b) Phenotypic distributions. (c) Mixed model controlling for subpopulation structure across all varieties (ALL) and within individual subpopulations (AUS = *aus*, IND = *indica*, TRJ = *tropical japonica*). (d) Mixed model with heading date as a covariate.



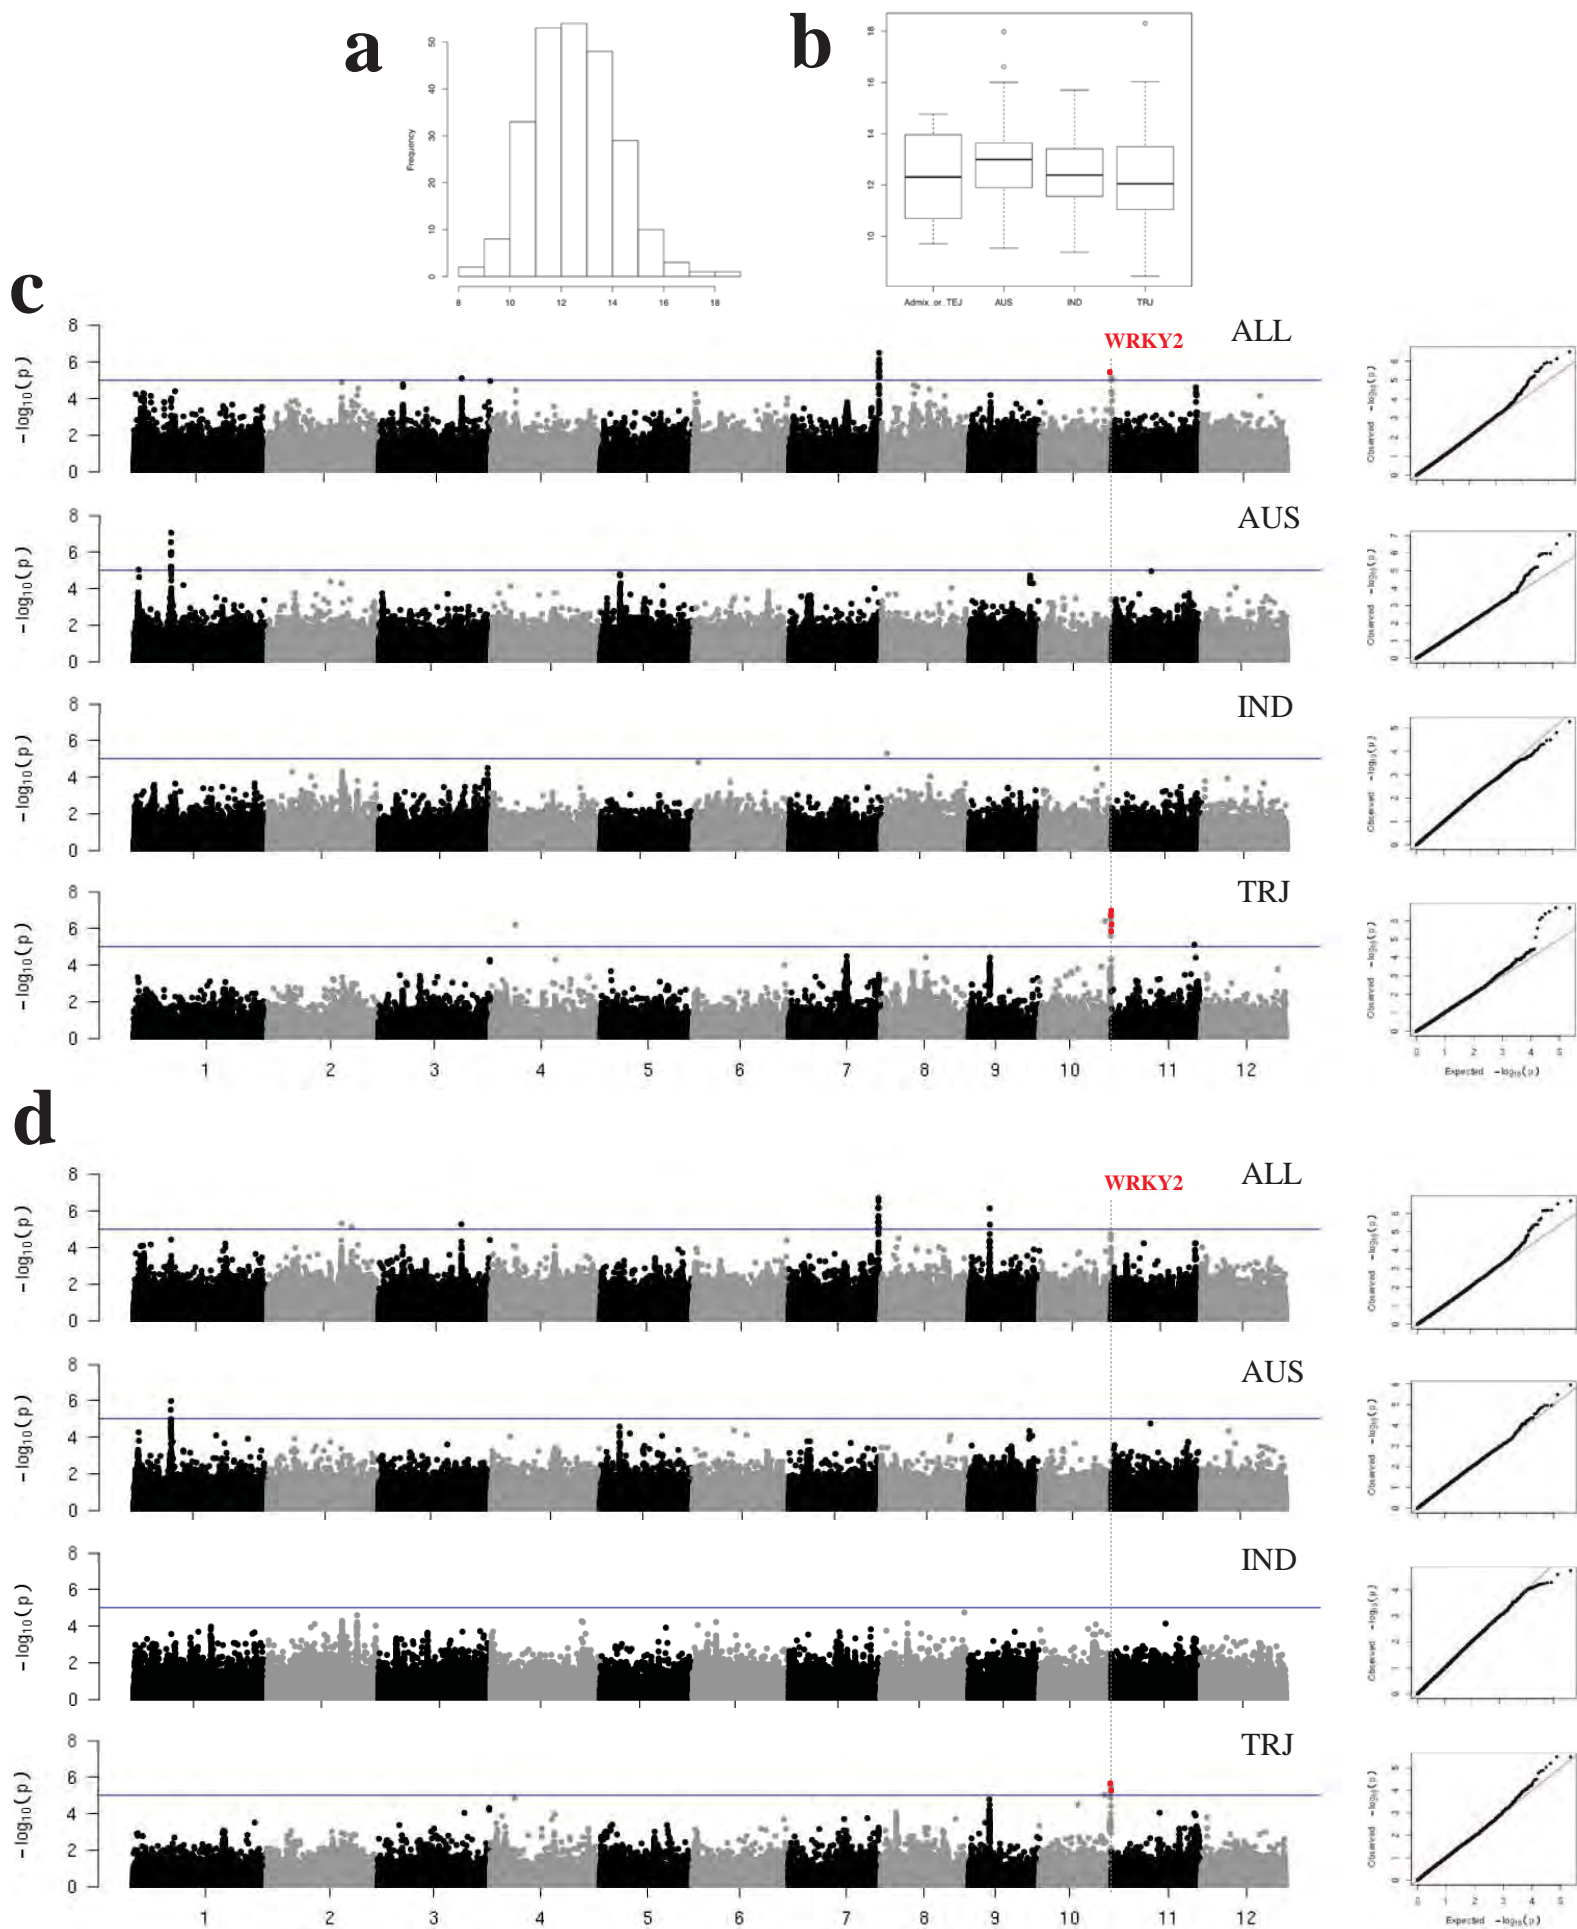

**Supplementary Figure 21. Summary of GWAS results for Maximum Primary Branch Length (cm).** (a, b) Phenotypic distributions. (c) Mixed model controlling for subpopulation structure across all varieties (ALL) and within individual subpopulations (AUS = *aus*, IND = *indica*, TRJ = *tropical japonica*). (d) Mixed model with heading date as a covariate.

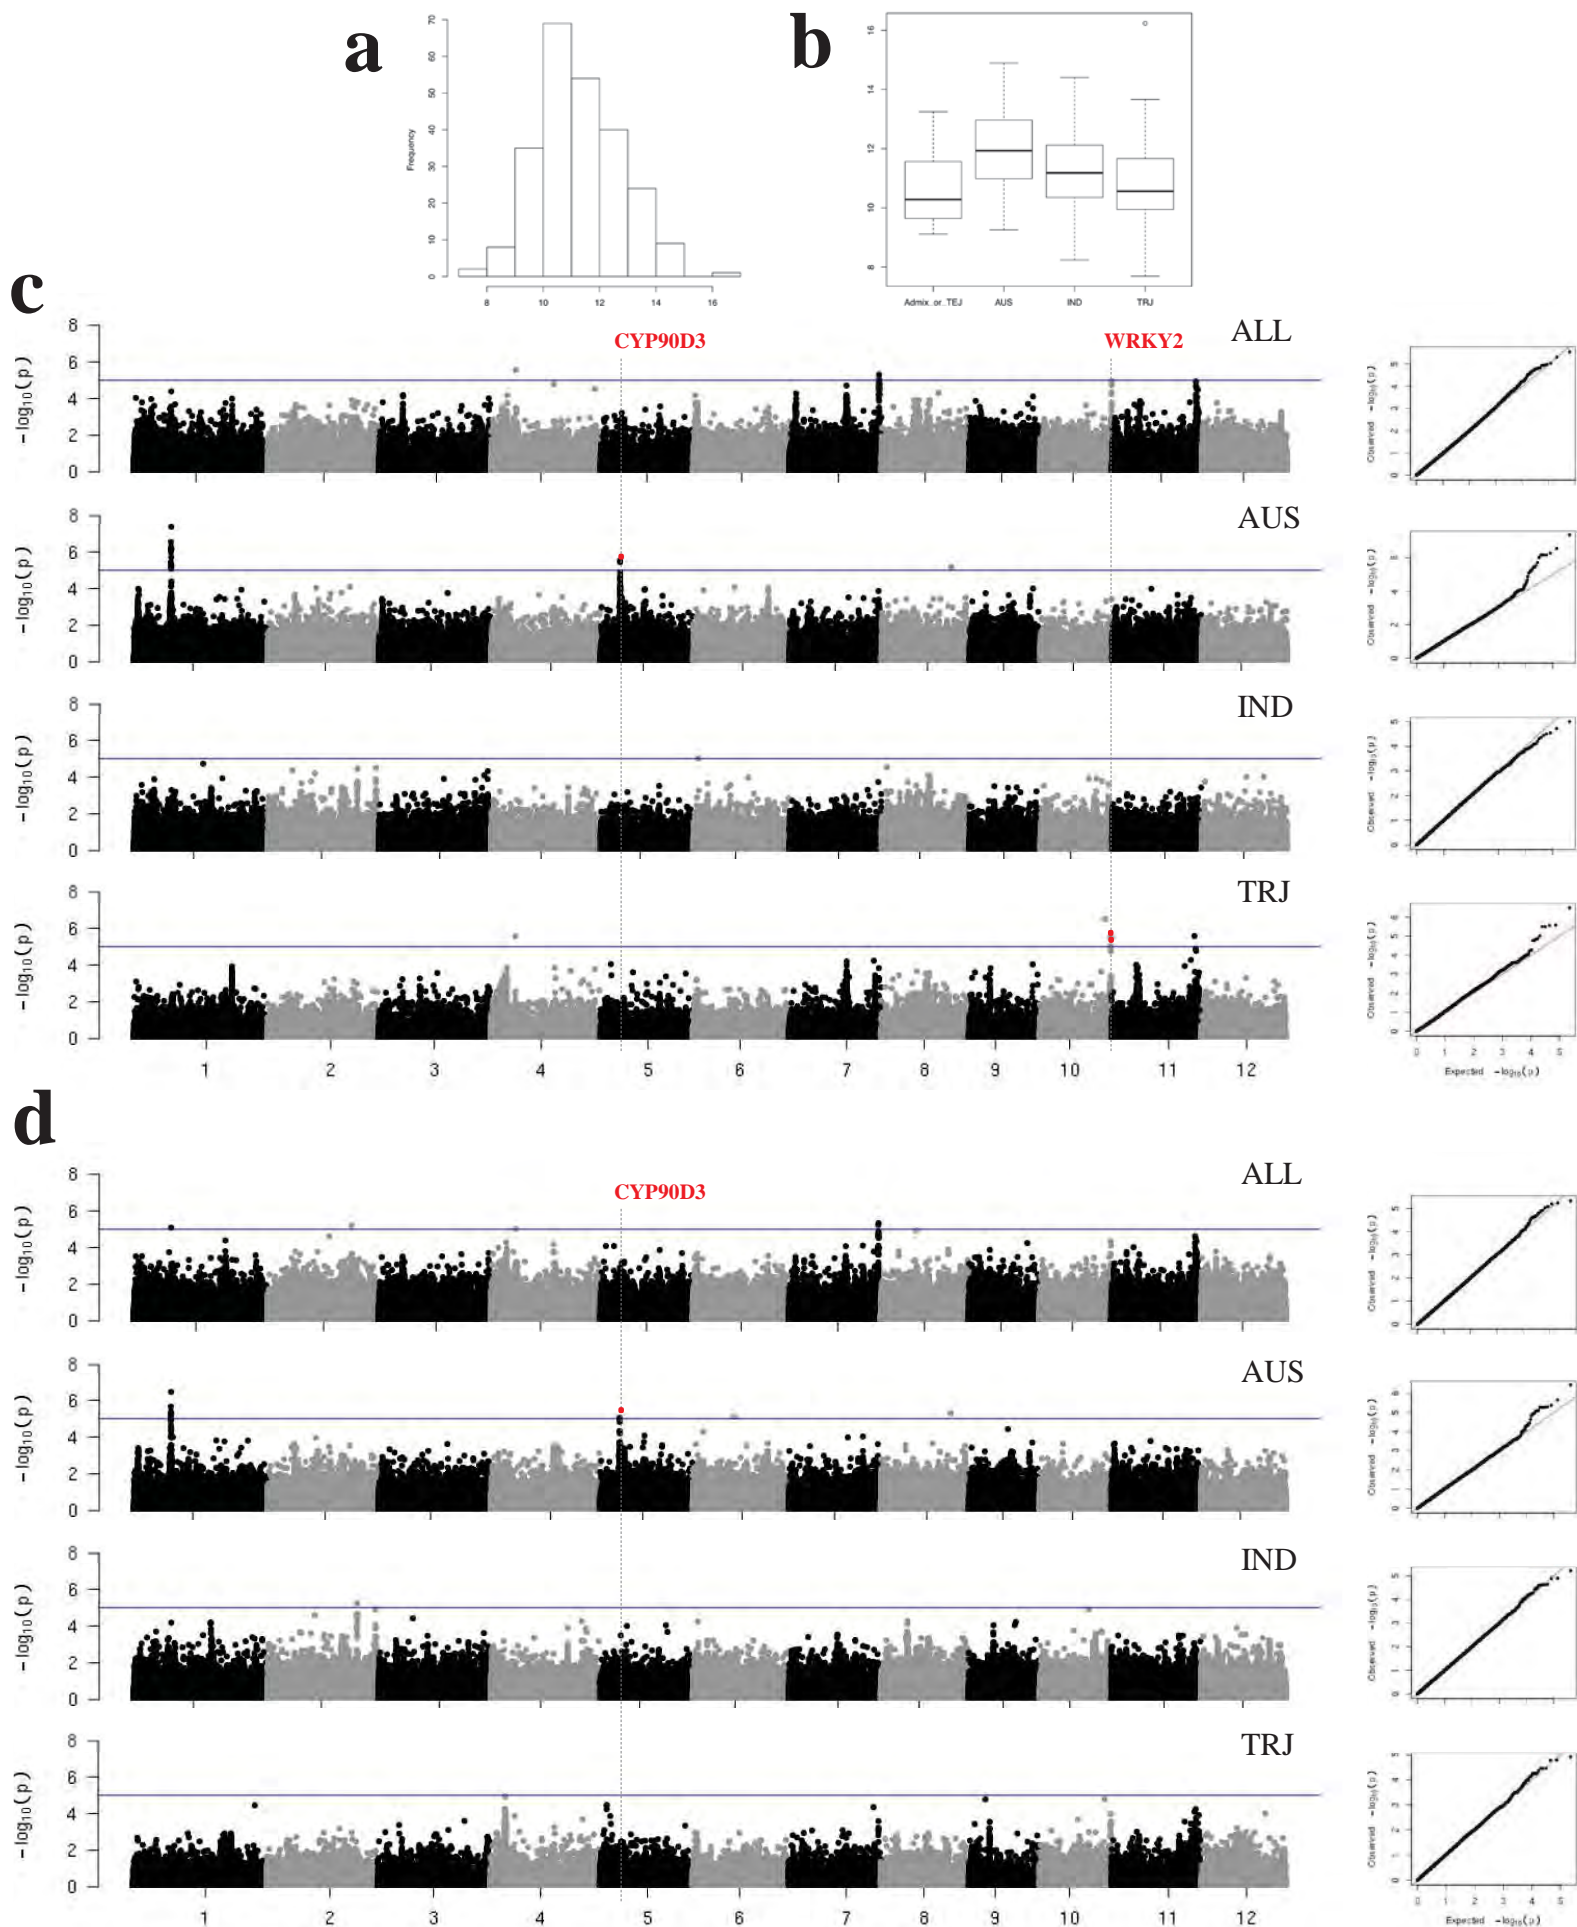

**Supplementary Figure 22. Summary of GWAS results for Maximum Primary Branch Length in the Upper Half of the Panicle (cm).** (a, b) Phenotypic distributions. (c) Mixed model controlling for subpopulation structure across all varieties (ALL) and within individual subpopulations (AUS = *aus*, IND = *indica*, TRJ = *tropical japonica*). (d) Mixed model with heading date as a covariate.



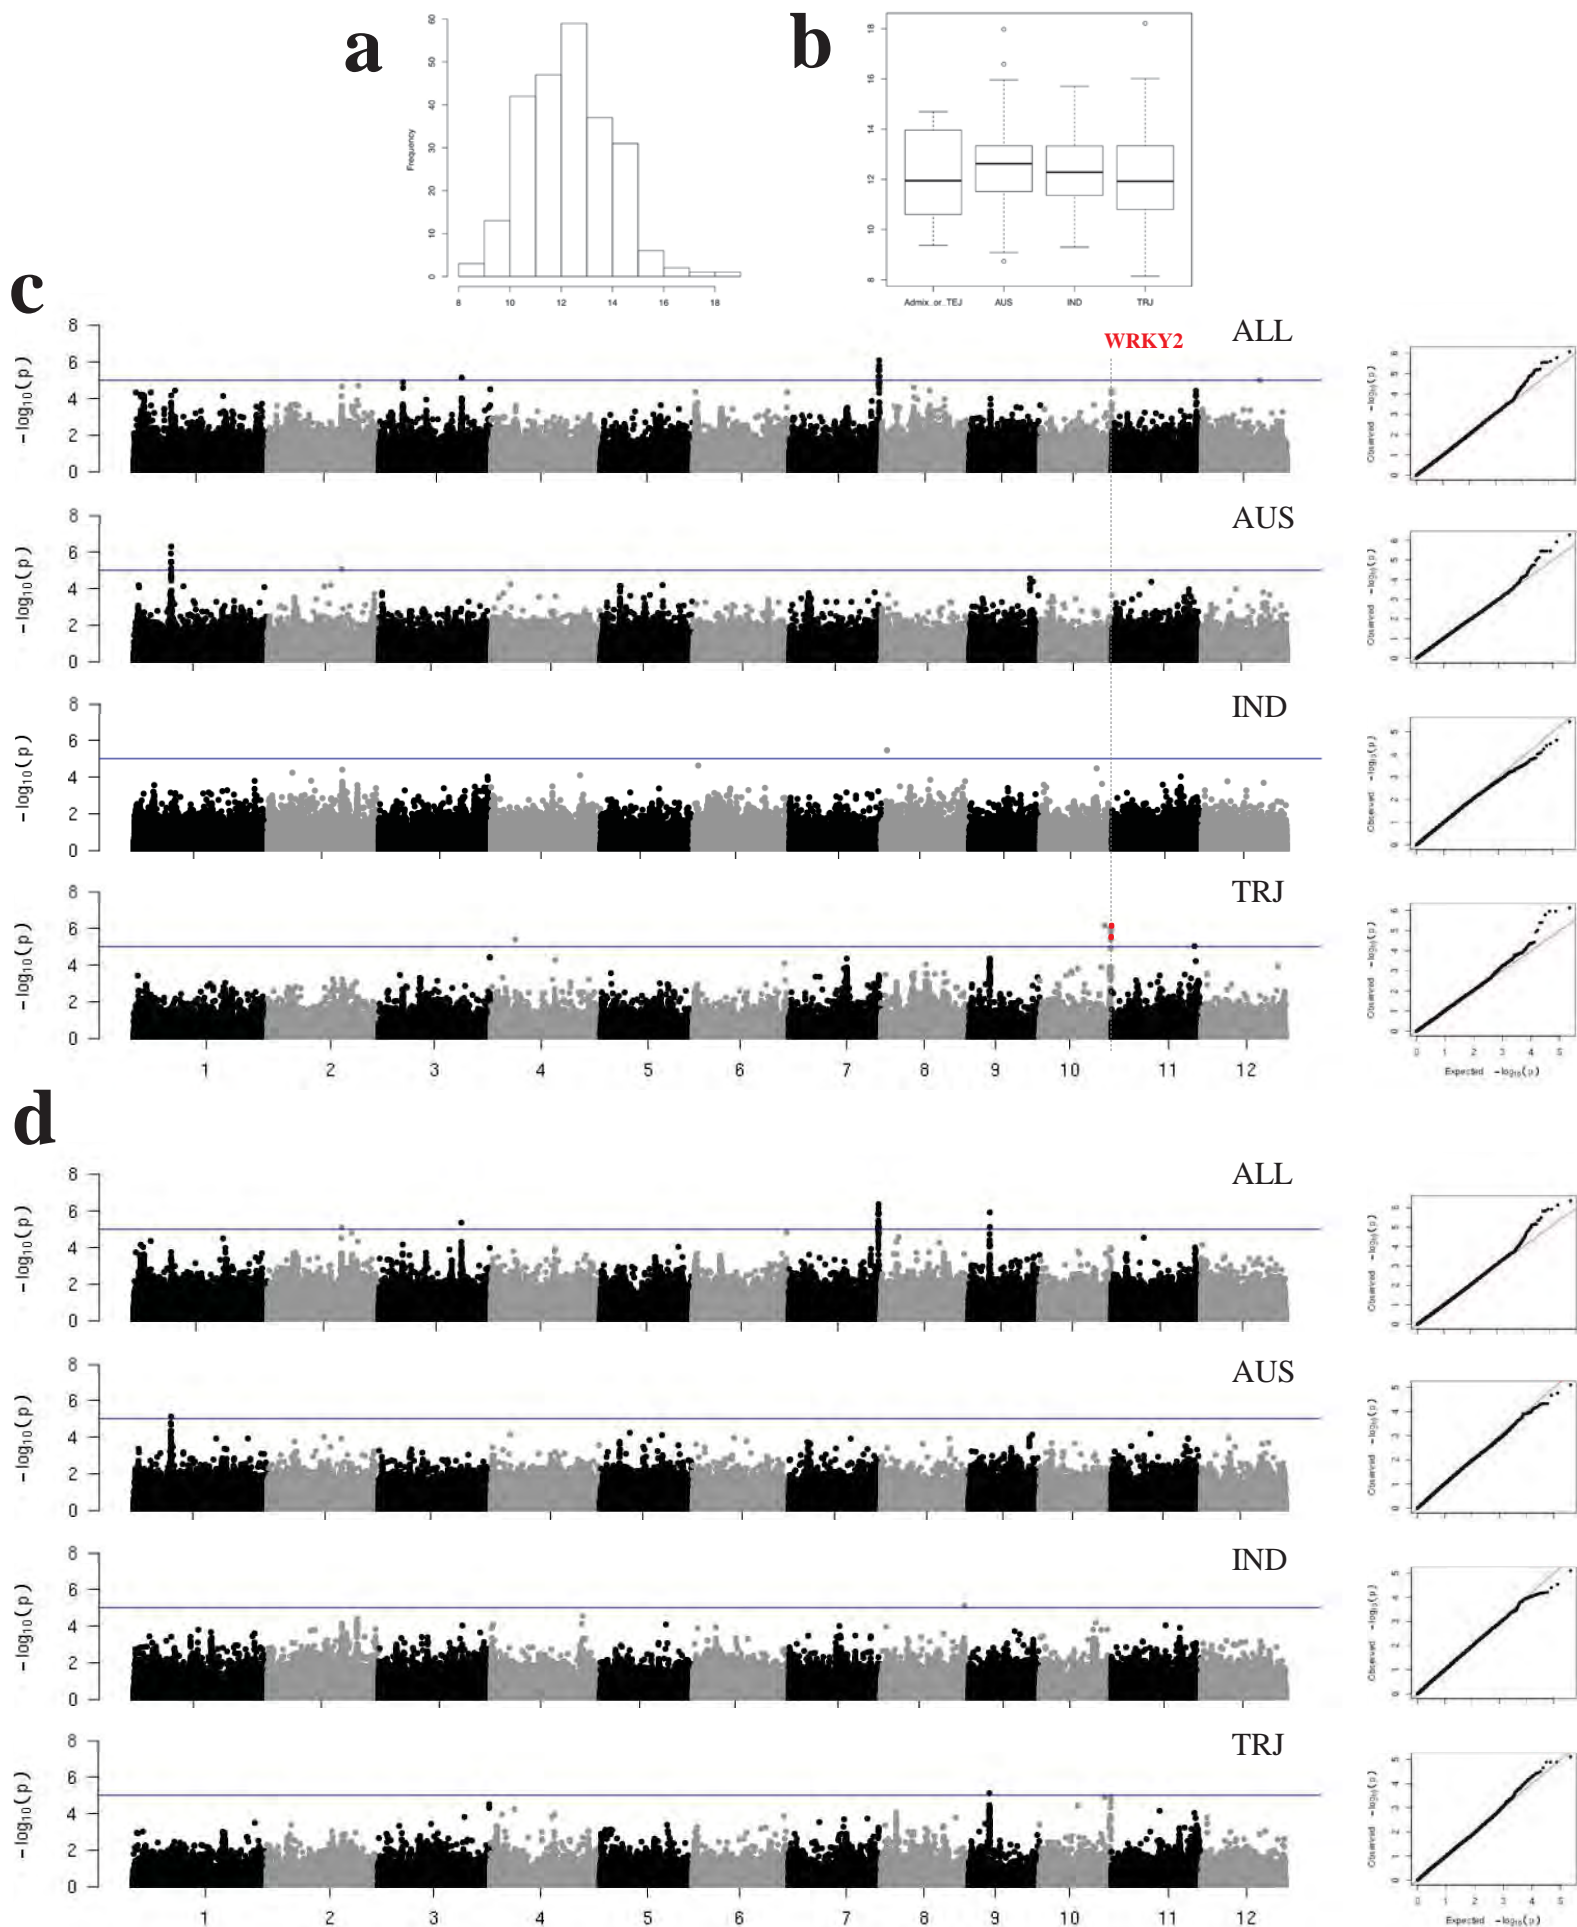

**Supplementary Figure 23. Summary of GWAS results for Maximum Primary Branch Length in the Lower Half of the Panicle (cm).** (a, b) Phenotypic distributions. (c) Mixed model controlling for subpopulation structure across all varieties (ALL) and within individual subpopulations (AUS = *aus*, IND = *indica*, TRJ = *tropical japonica*). (d) Mixed model with heading date as a covariate.

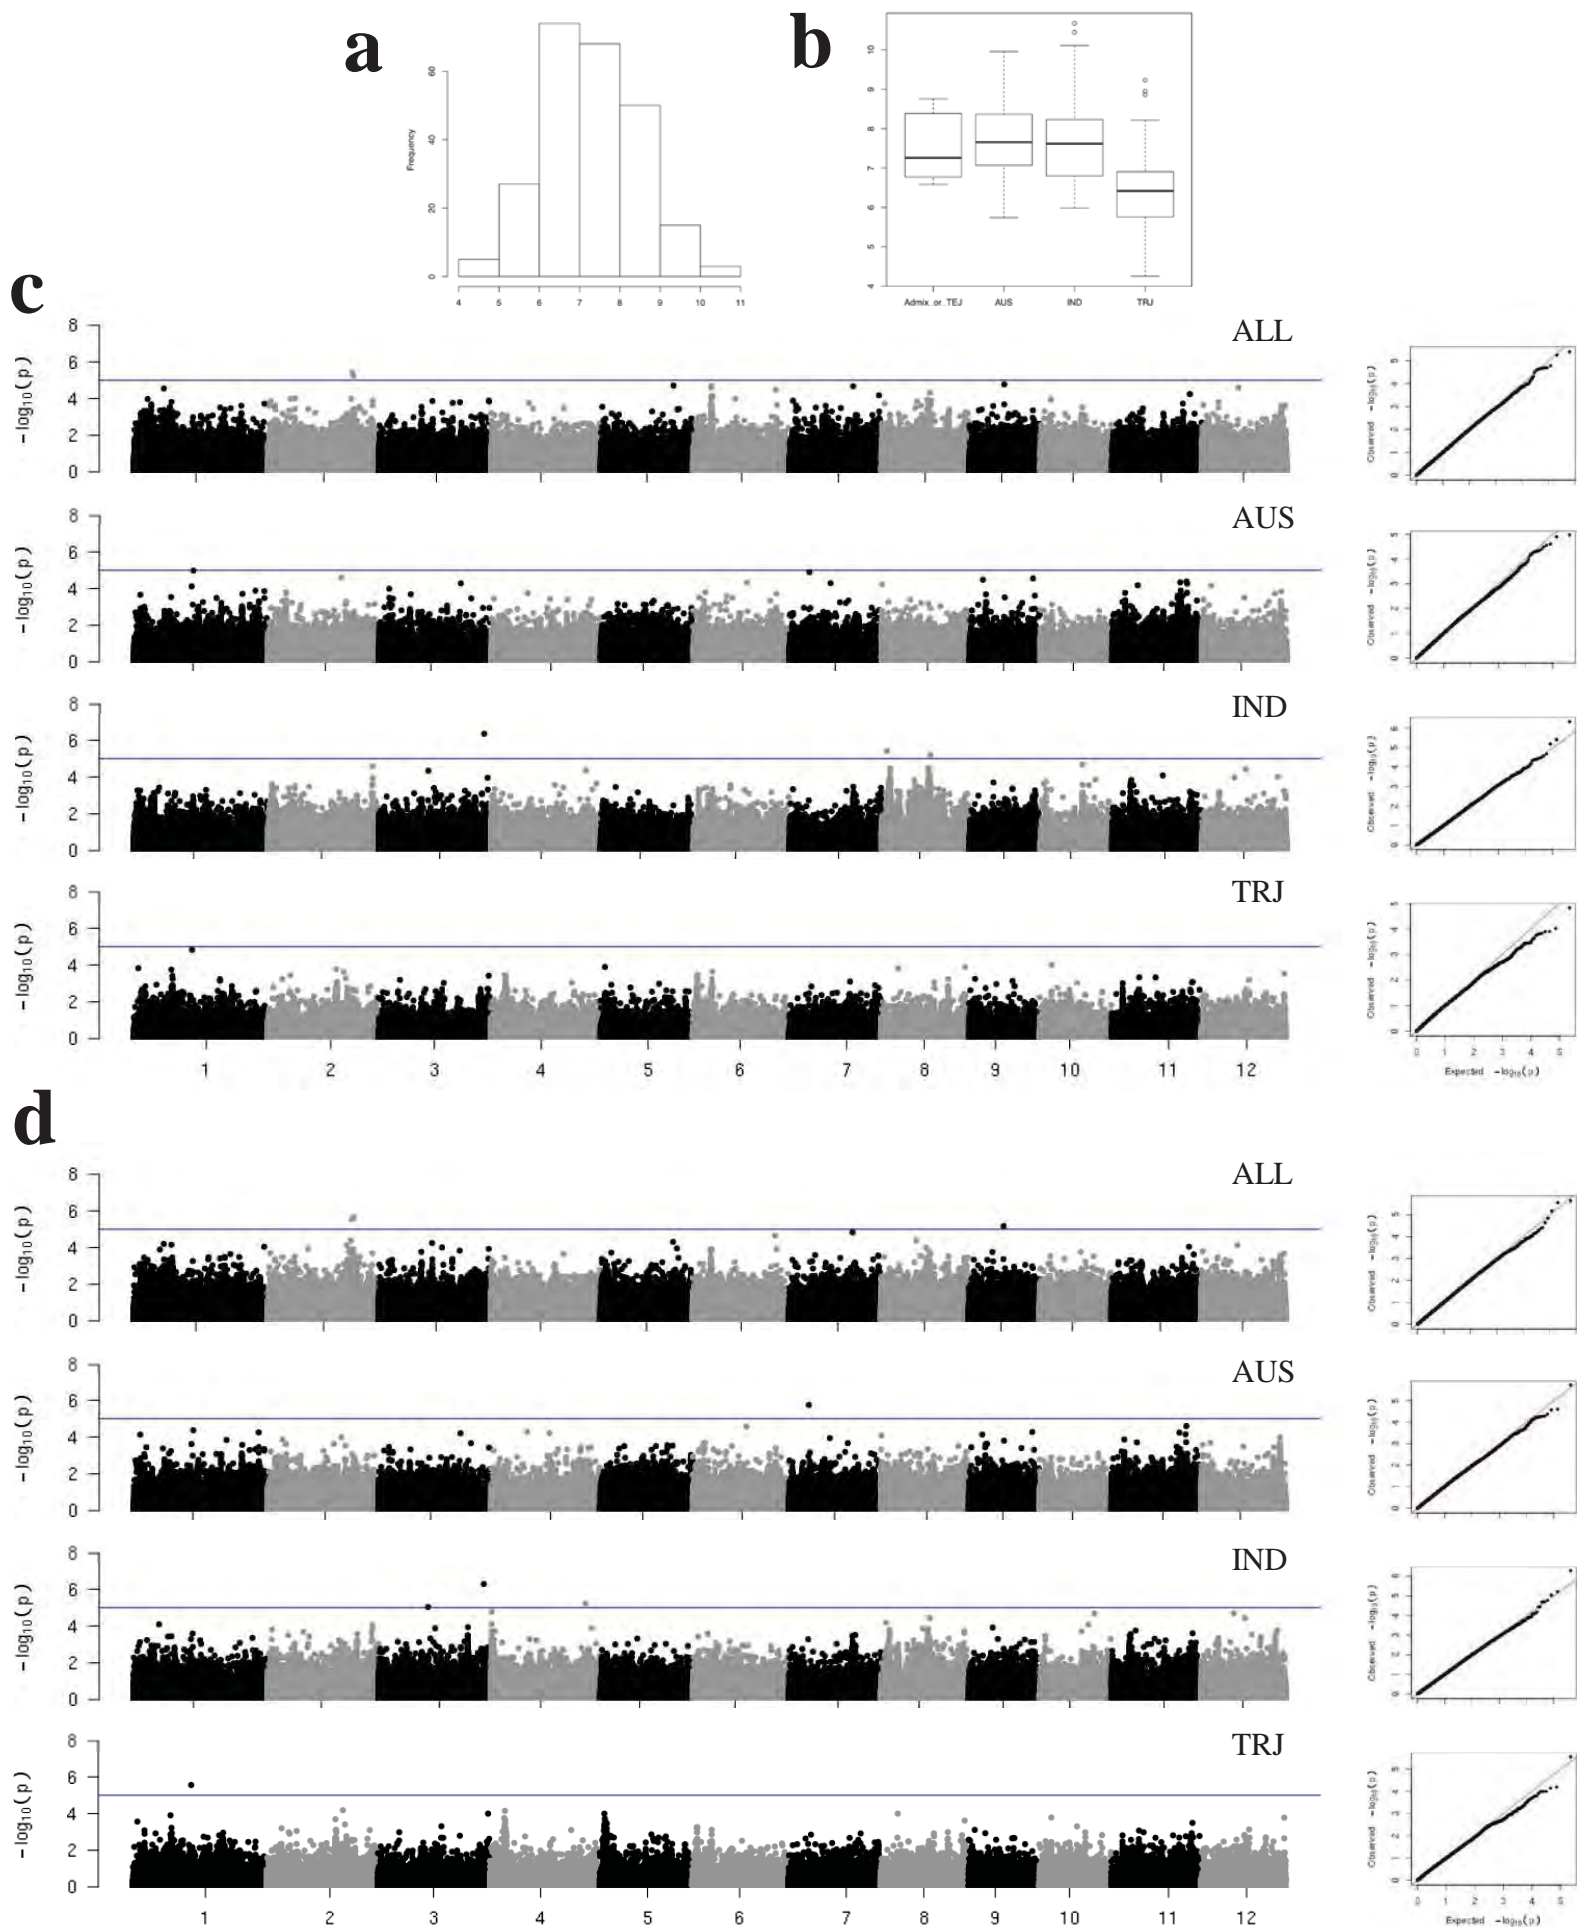

**Supplementary Figure 24. Summary of GWAS results for Minimum Primary Branch Length (cm).** (a, b) Phenotypic distributions. (c) Mixed model controlling for subpopulation structure across all varieties (ALL) and within individual subpopulations (AUS = *aus*, IND = *indica*, TRJ = *tropical japonica*). (d) Mixed model with heading date as a covariate.



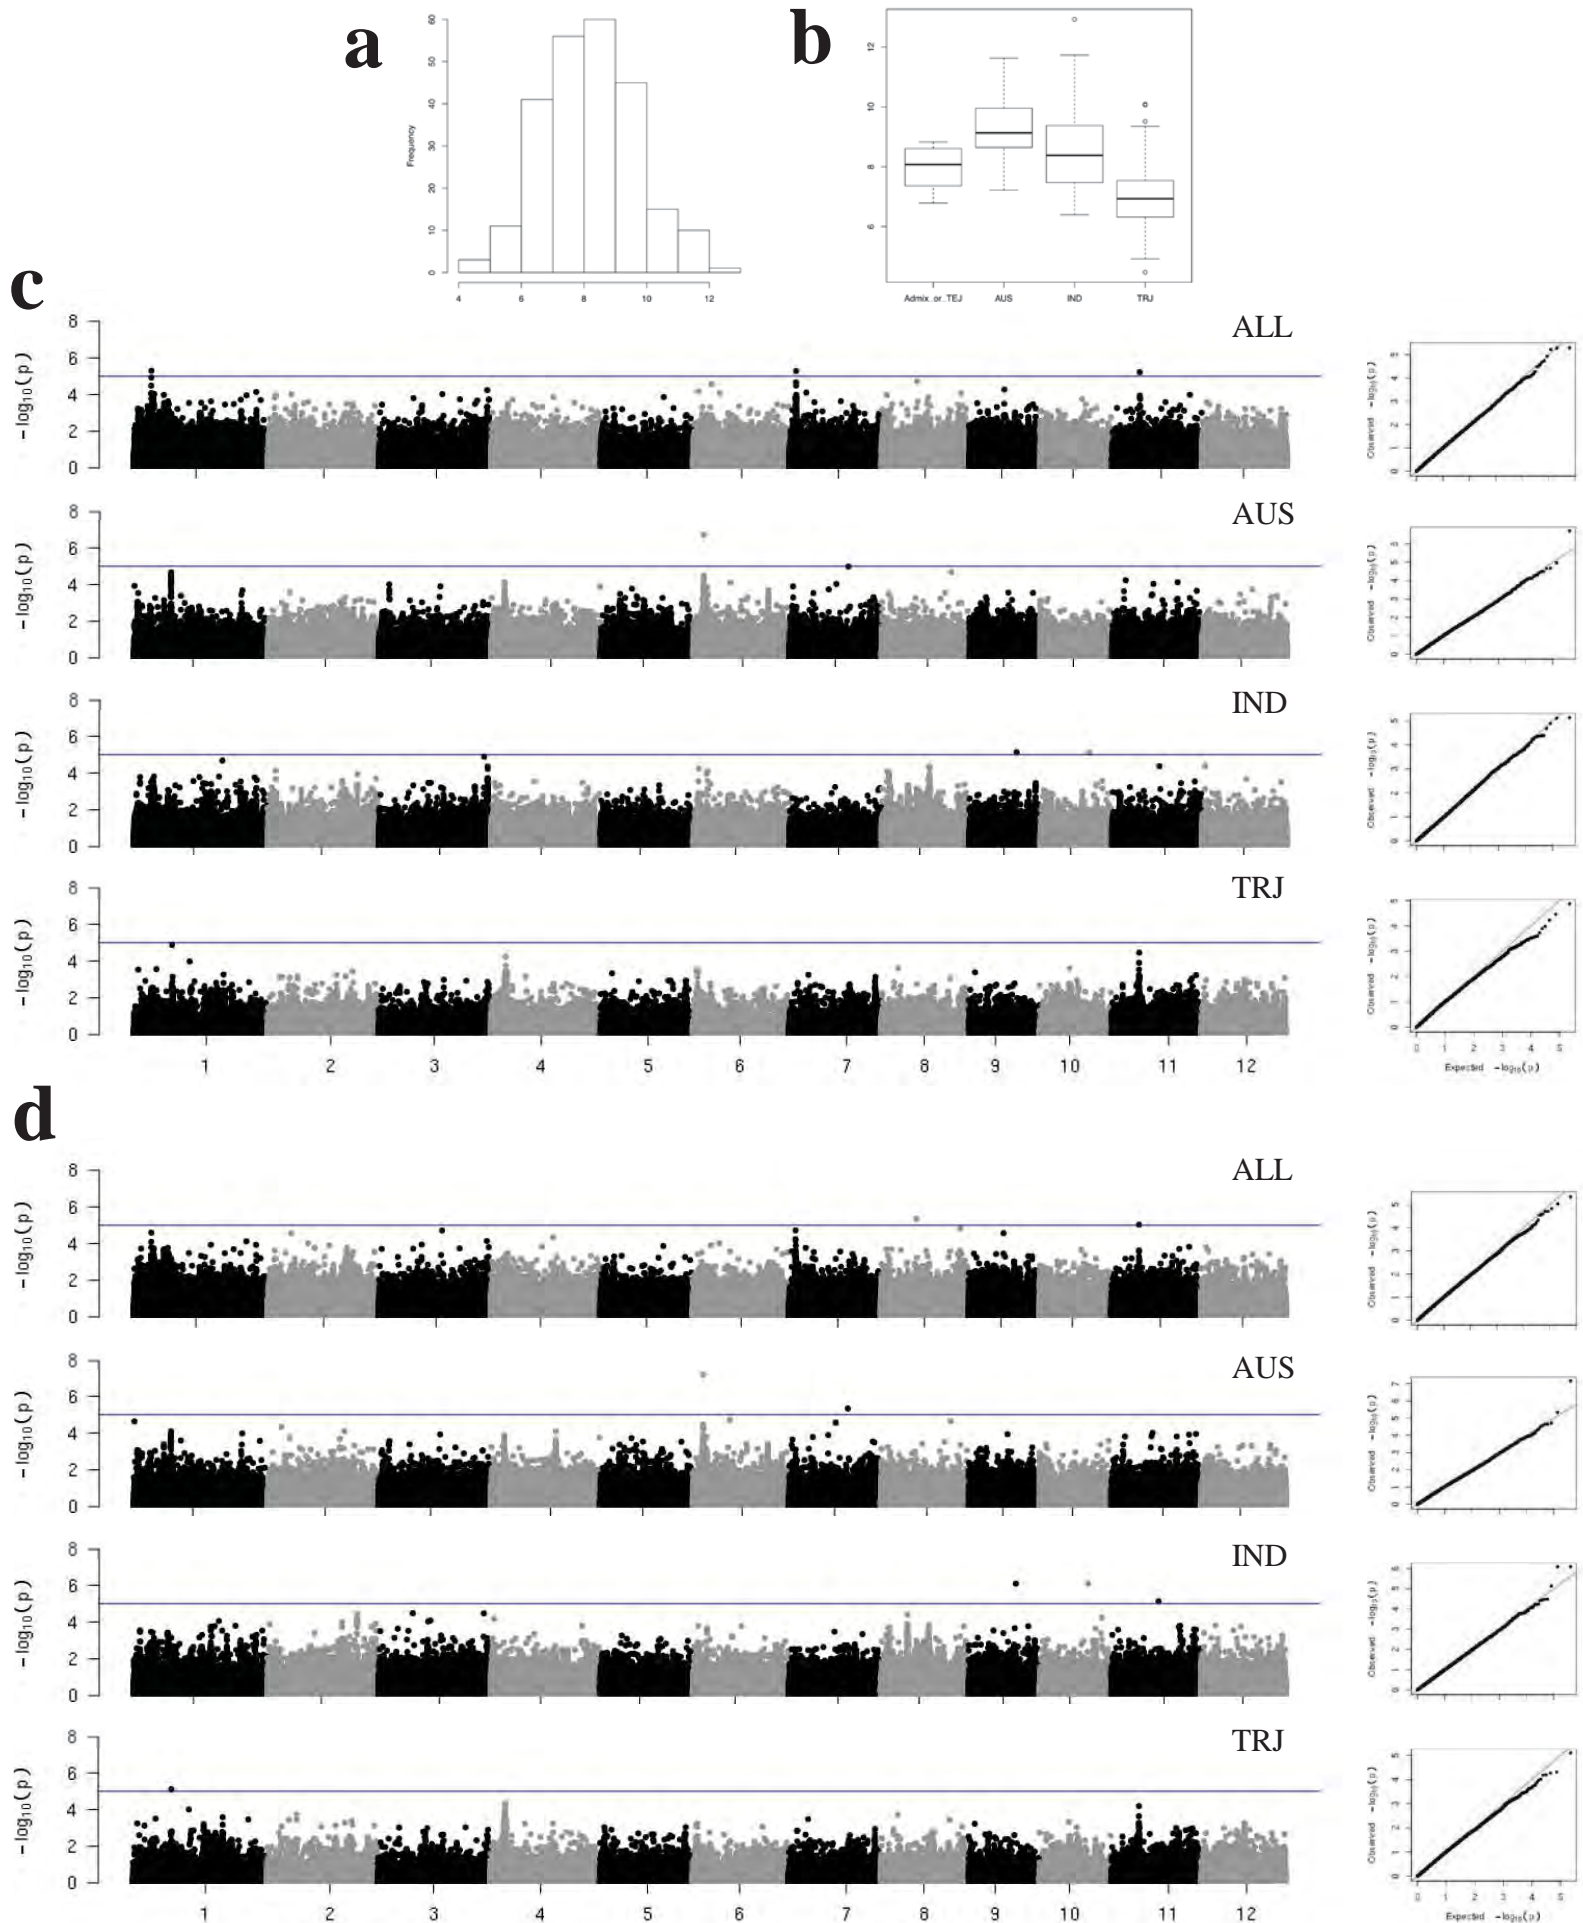

**Supplementary Figure 25. Summary of GWAS results for Minimum Primary Branch Length in the Upper Half of the Panicle (cm).** (a, b) Phenotypic distributions. (c) Mixed model controlling for subpopulation structure across all varieties (ALL) and within individual subpopulations (AUS = *aus*, IND = *indica*, TRJ = *tropical japonica*). (d) Mixed model with heading date as a covariate.

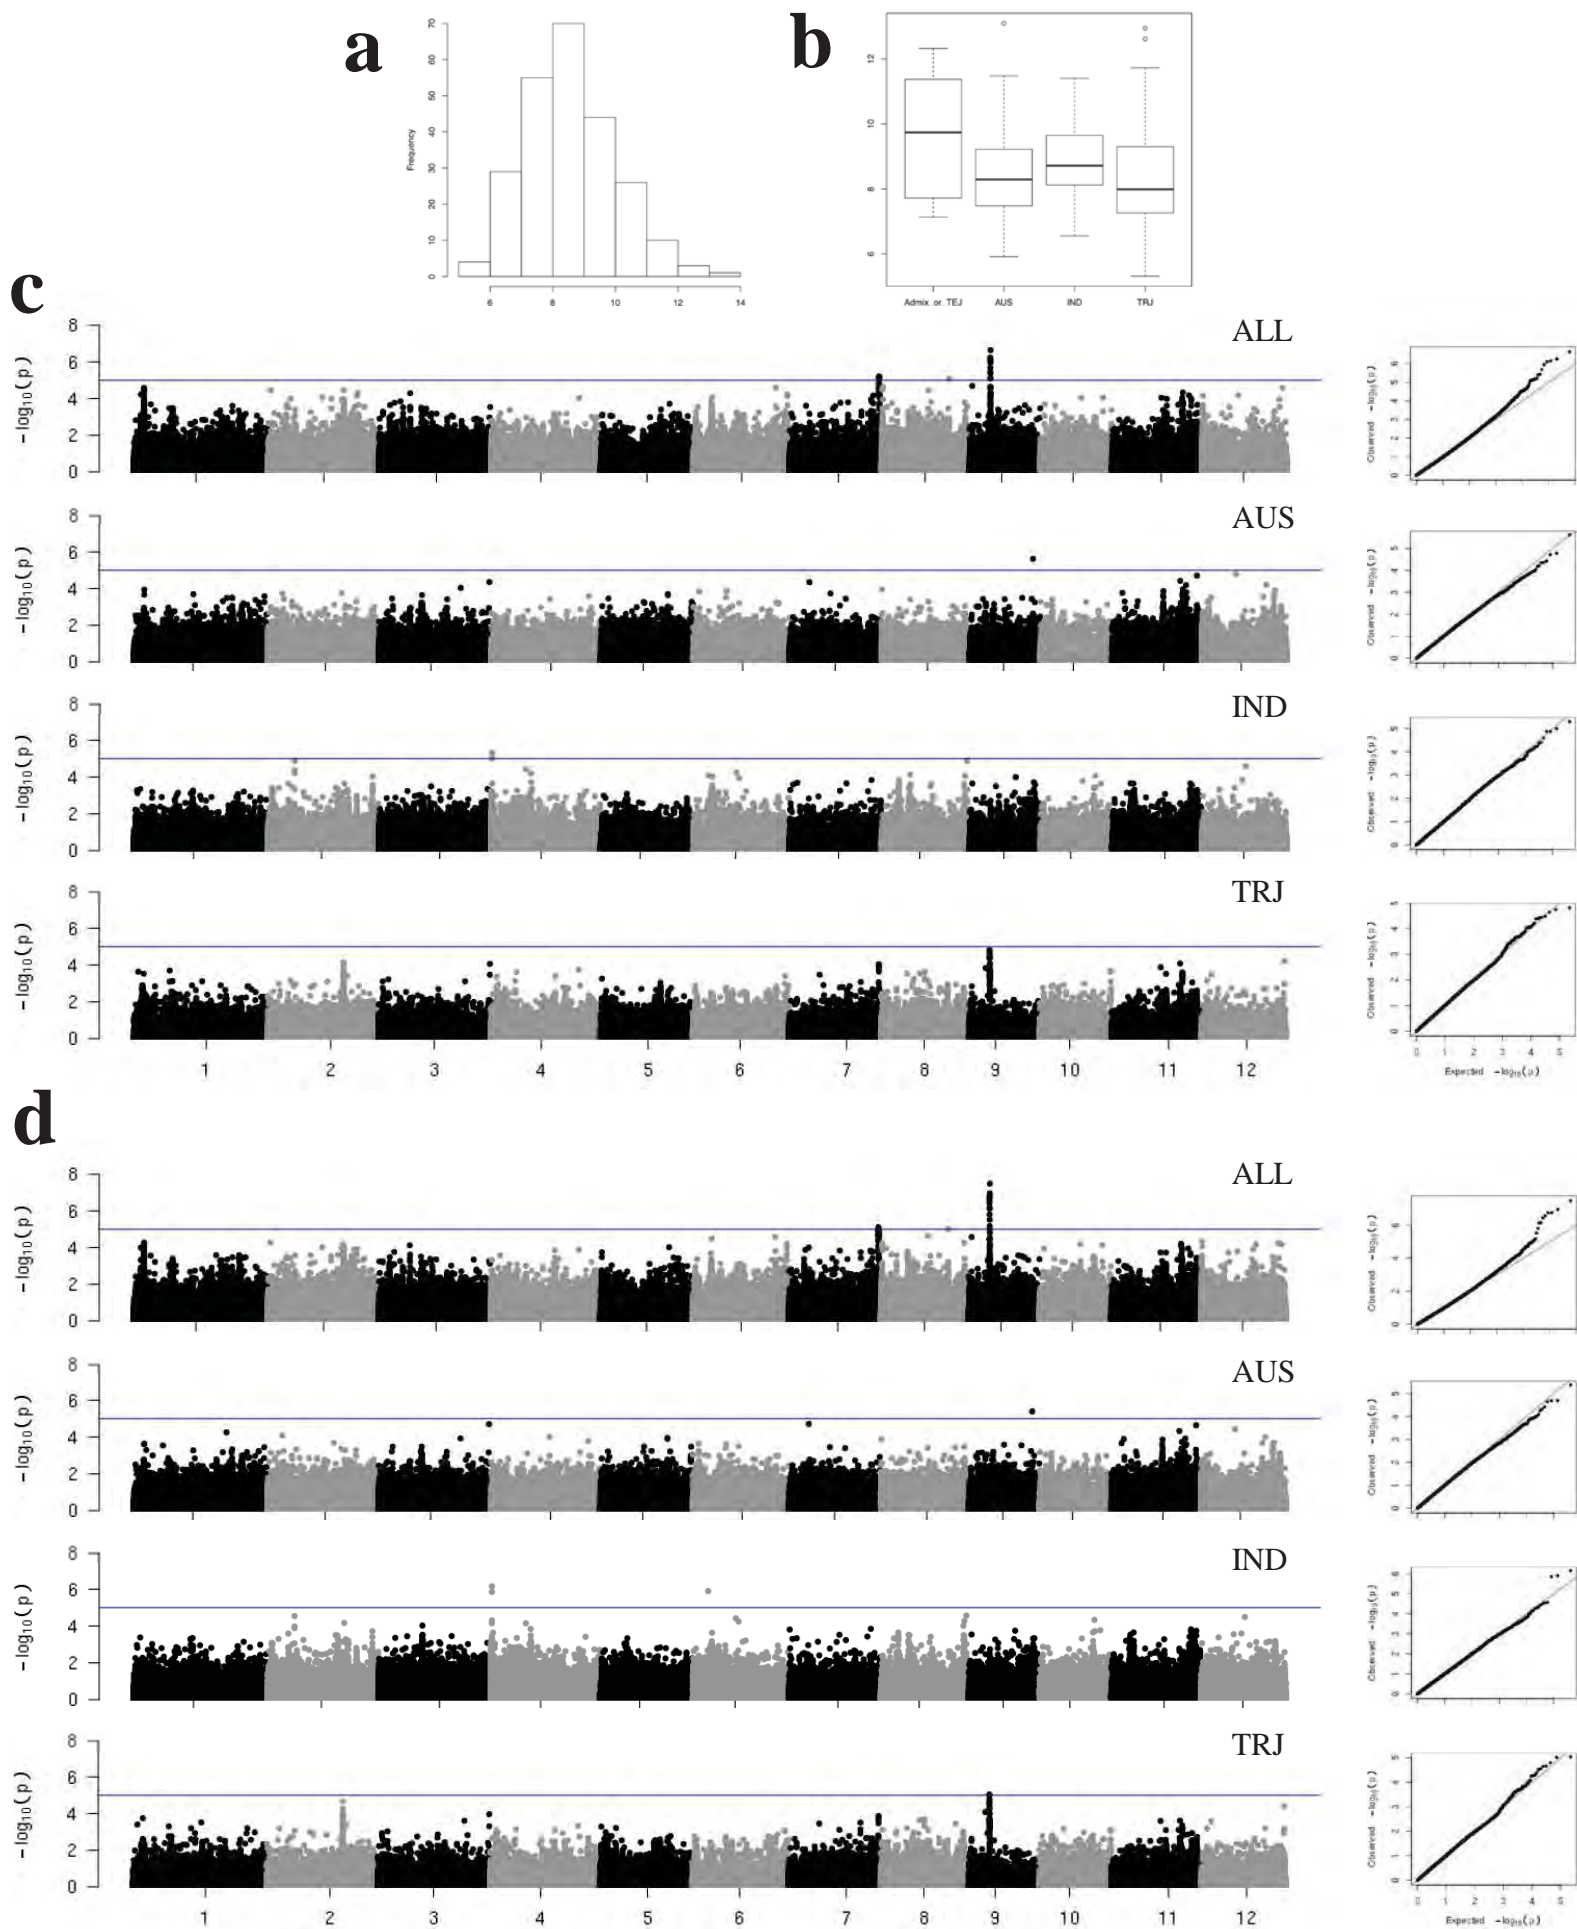

**Supplementary Figure 26. Summary of GWAS results for Minimum Primary Branch Length in the Lower Half of the Panicle (cm).** (a, b) Phenotypic distributions. (c) Mixed model controlling for subpopulation structure across all varieties (ALL) and within individual subpopulations (AUS = *aus*, IND = *indica*, TRJ = *tropical japonica*). (d) Mixed model with heading date as a covariate.



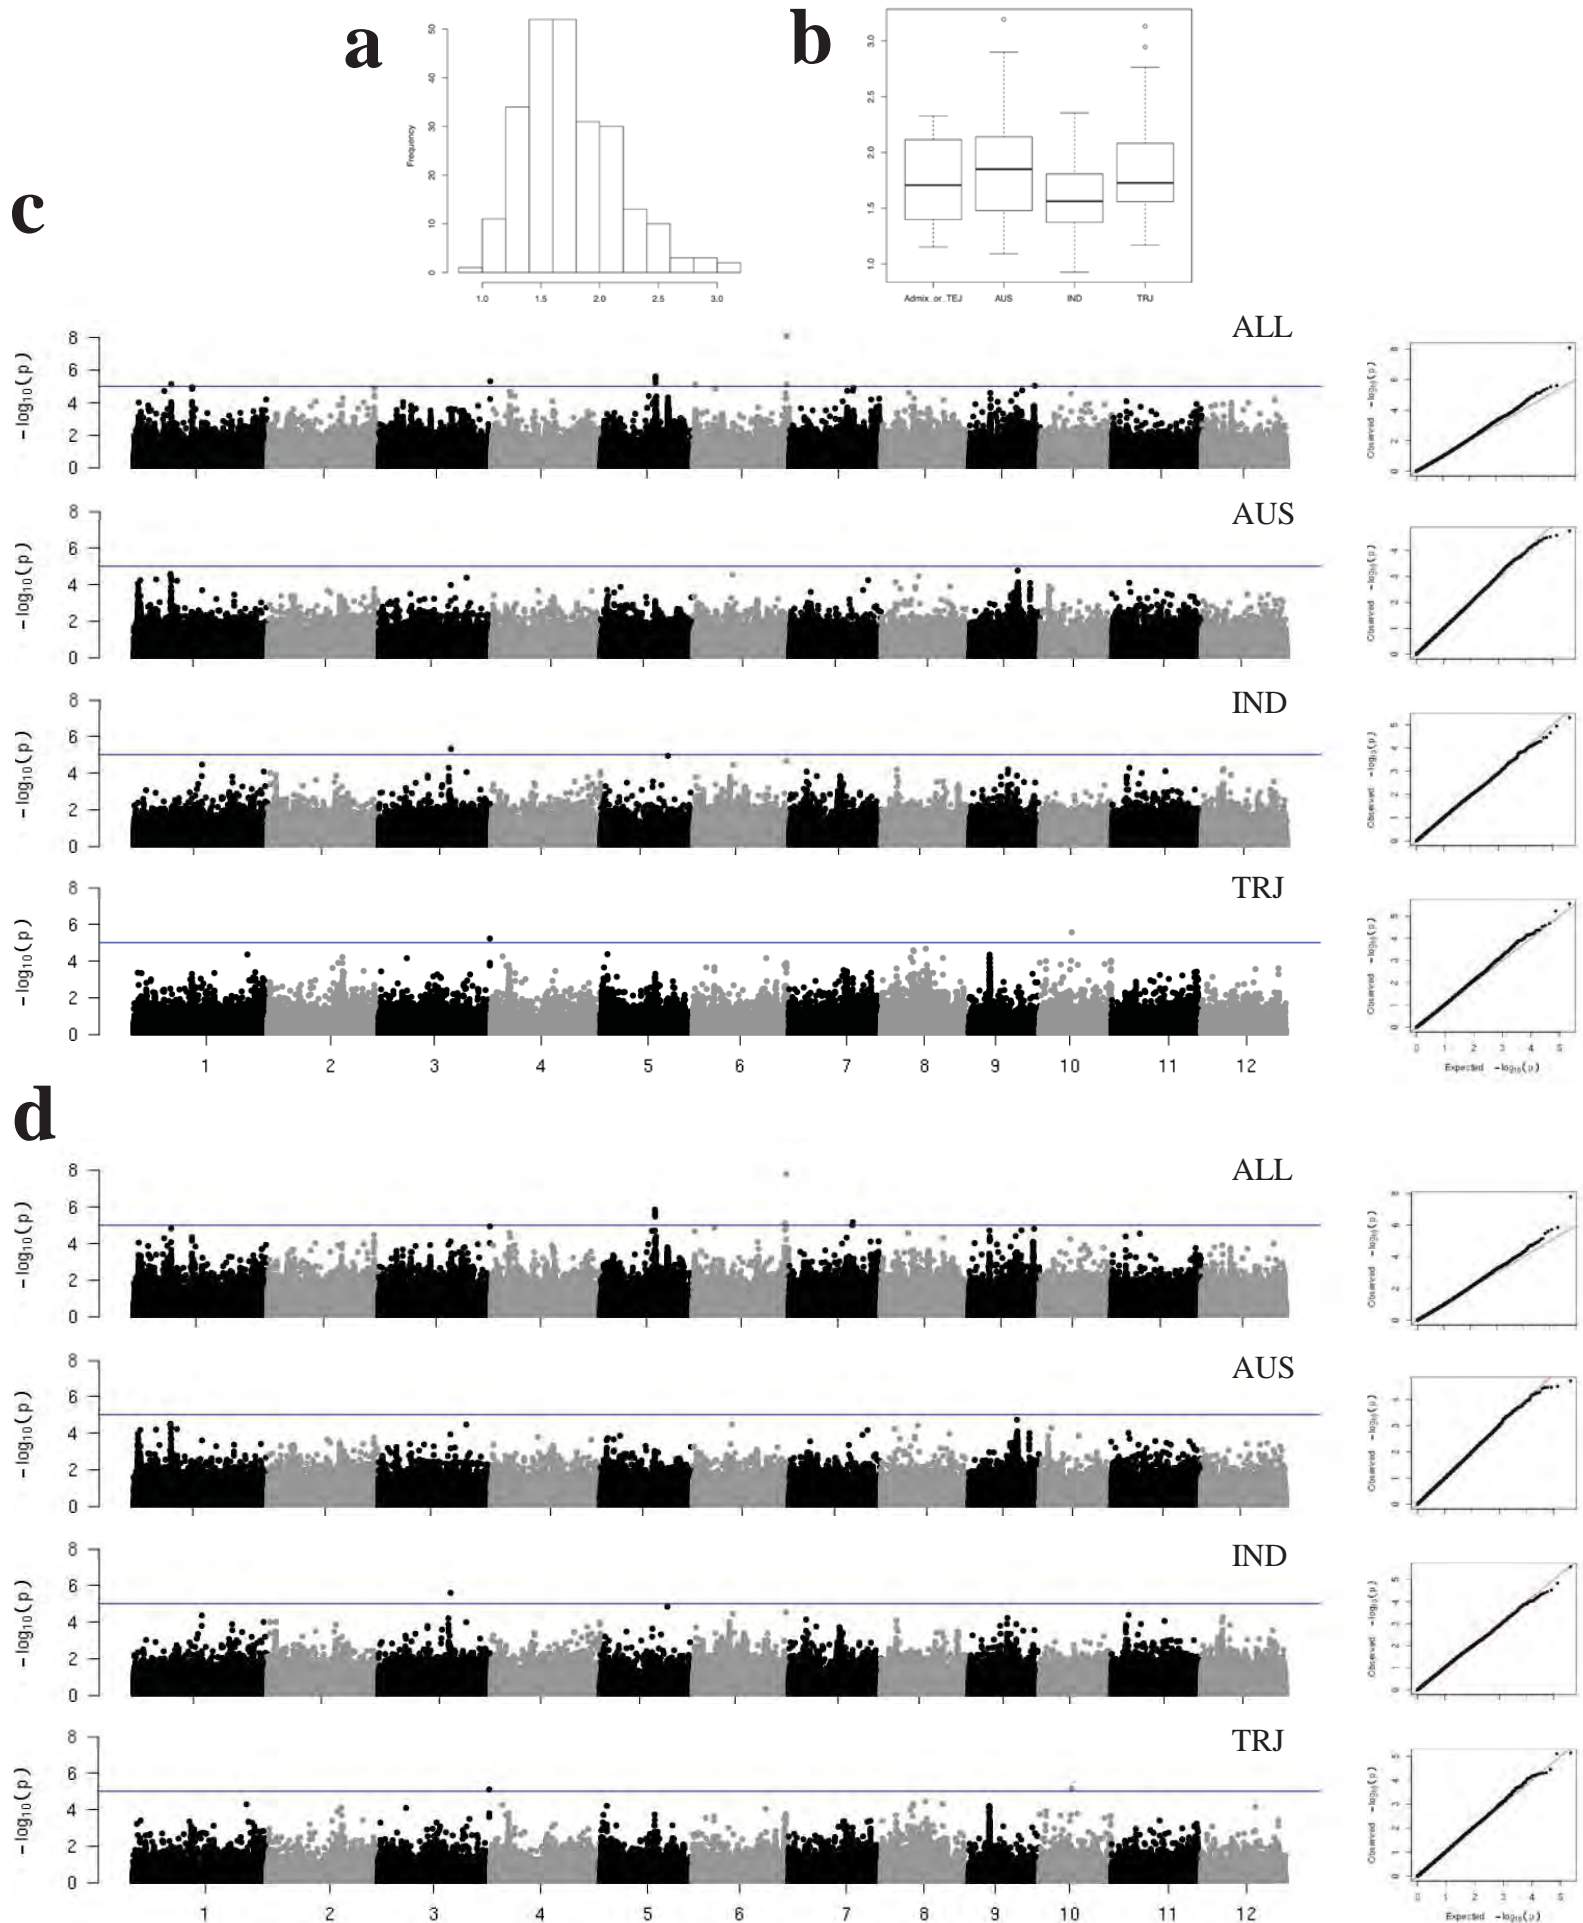

**Supplementary Figure 27. Summary of GWAS results for Primary Branch Length Standard Deviation (cm).** (a, b) Phenotypic distributions. (c) Mixed model controlling for subpopulation structure across all varieties (ALL) and within individual subpopulations (AUS = *aus*, IND = *indica*, TRJ = *tropical japonica*). (d) Mixed model with heading date as a covariate.

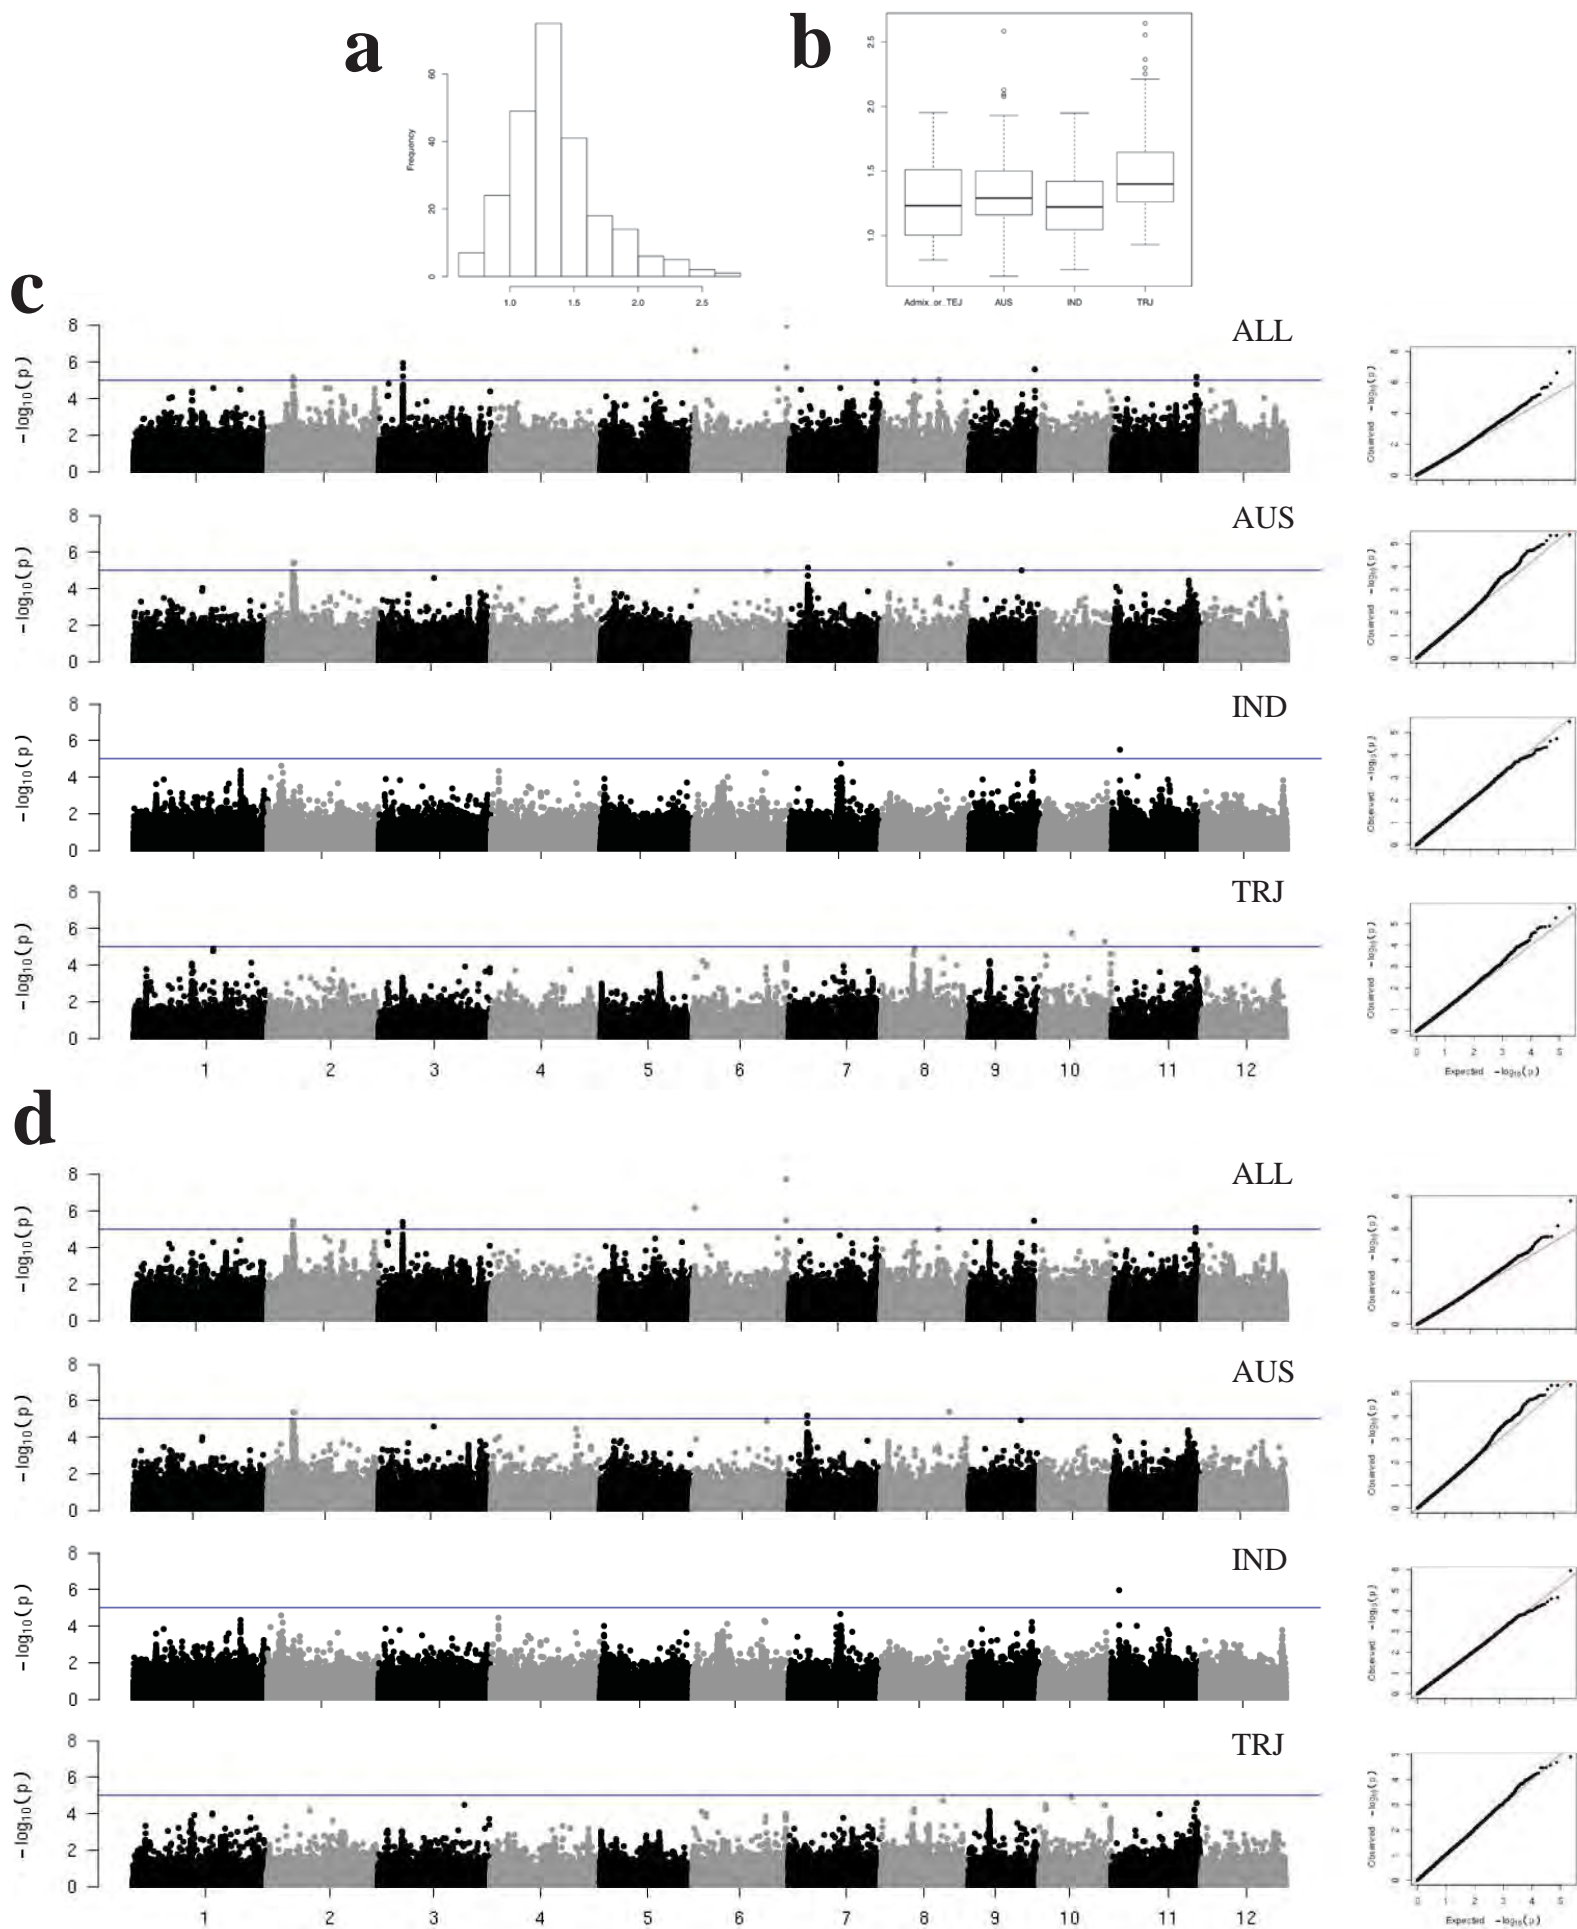

**Supplementary Figure 28. Summary of GWAS results for Primary Branch Length Standard Deviation in the Upper Half of the Panicle (cm).** (a, b) Phenotypic distributions. (c) Mixed model controlling for subpopulation structure across all varieties (ALL) and within individual subpopulations (AUS = *aus*, IND = *indica*, TRJ = *tropical japonica*). (d) Mixed model with heading date as a covariate.



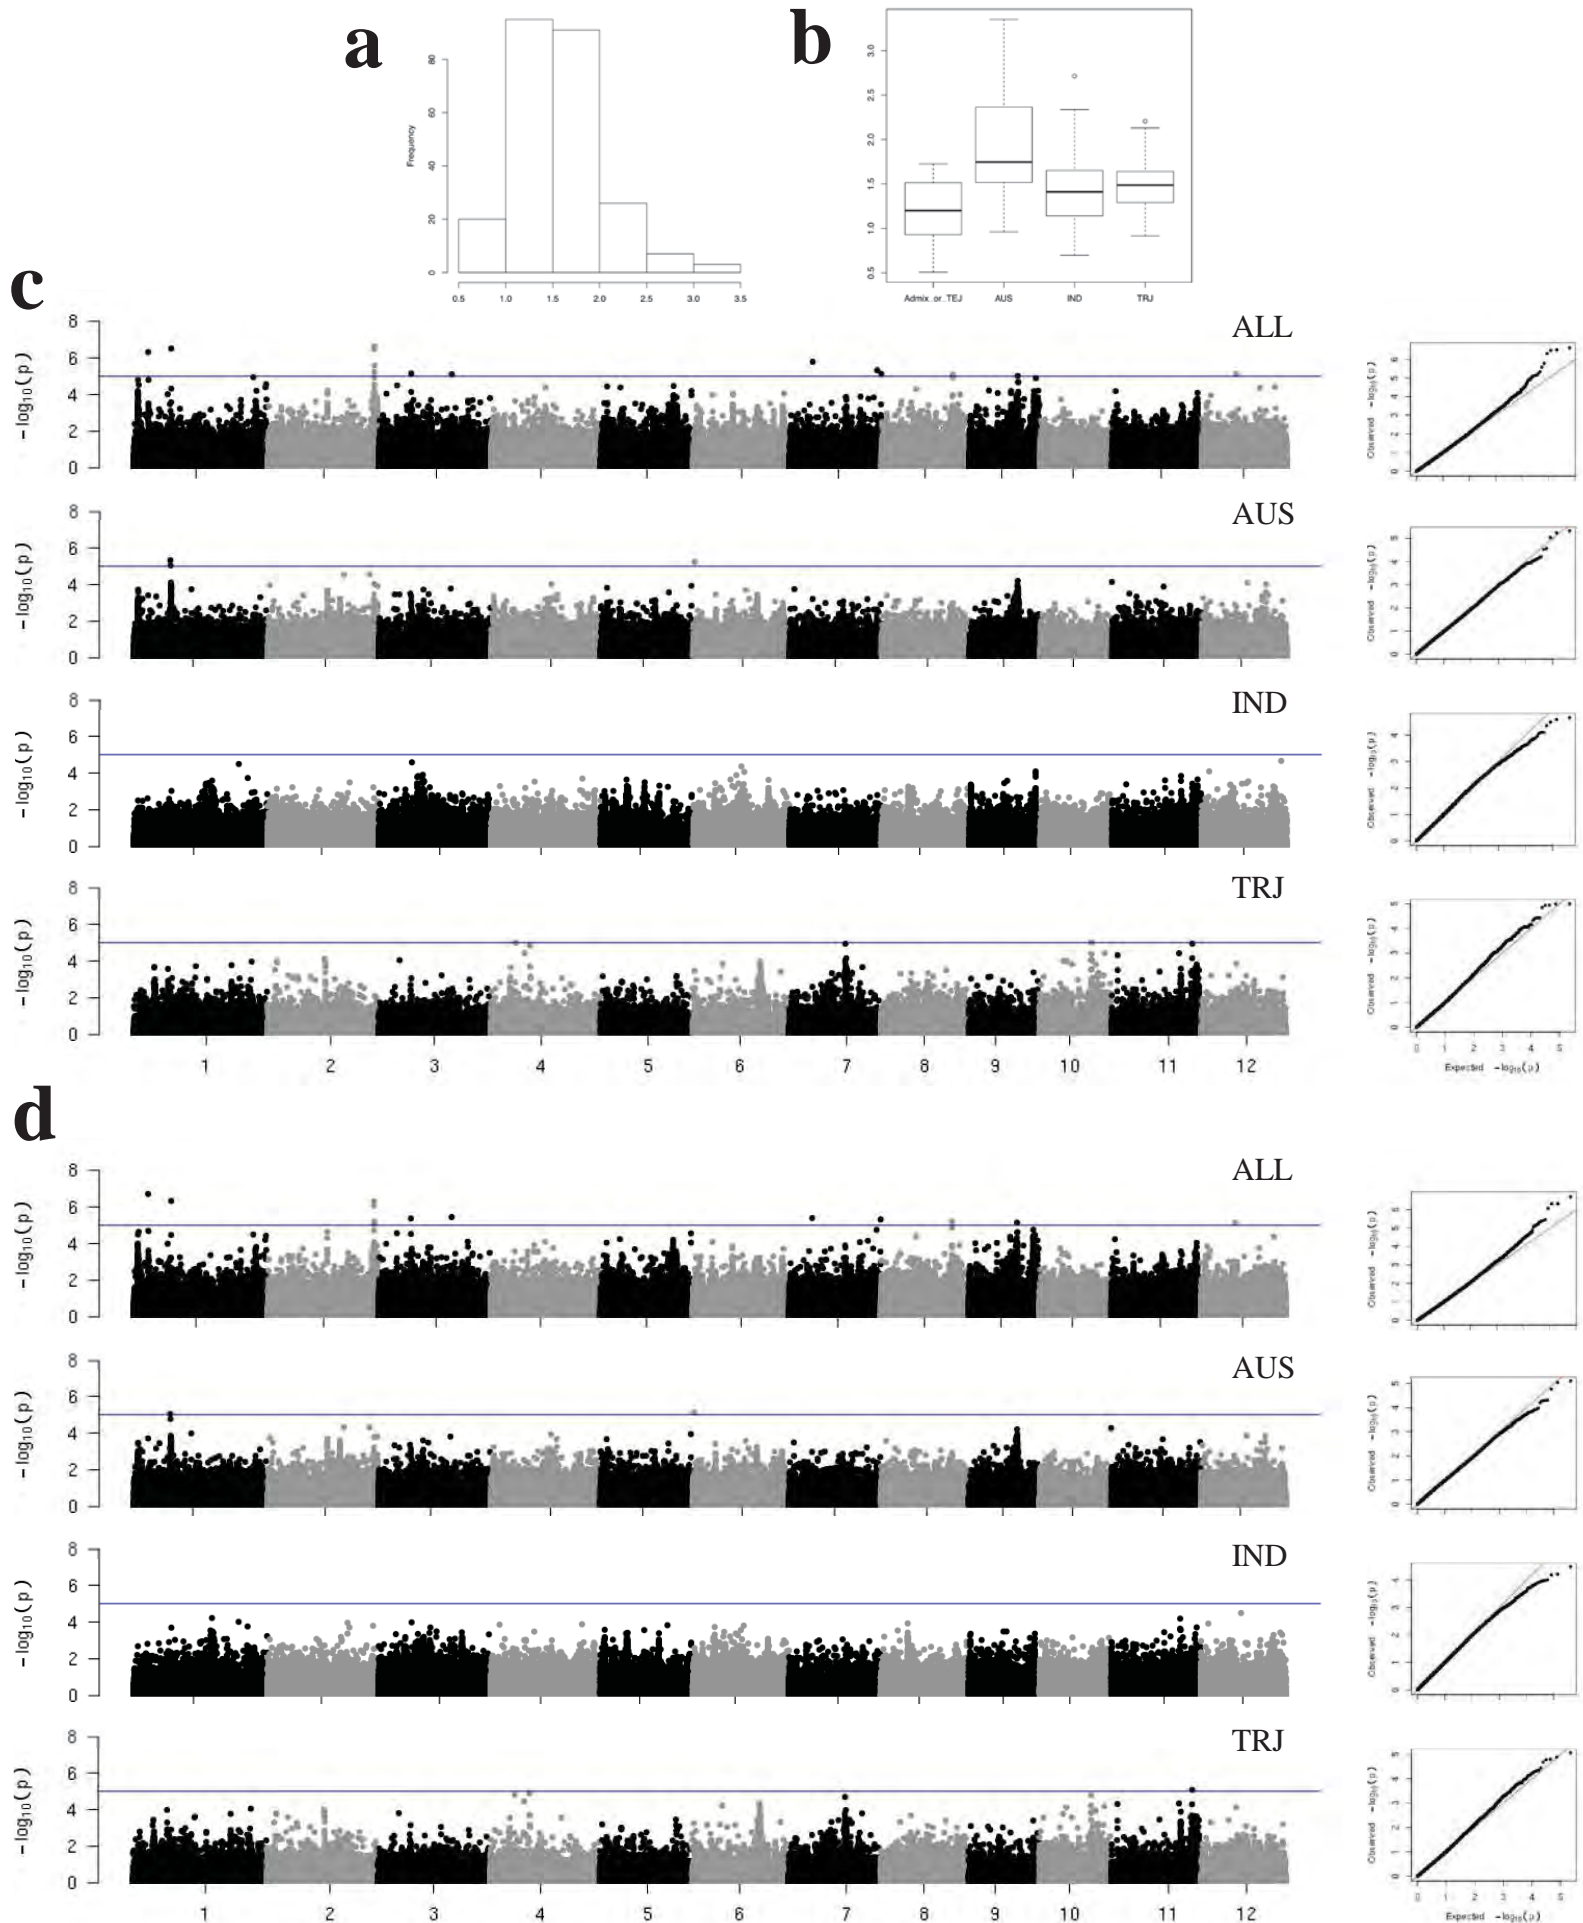

**Supplementary Figure 29. Summary of GWAS results for Primary Branch Length Standard Deviation in the Lower Half of the Panicle (cm).** (a, b) Phenotypic distributions. (c) Mixed model controlling for subpopulation structure across all varieties (ALL) and within individual subpopulations (AUS = *aus*, IND = *indica*, TRJ = *tropical japonica*). (d) Mixed model with heading date as a covariate.

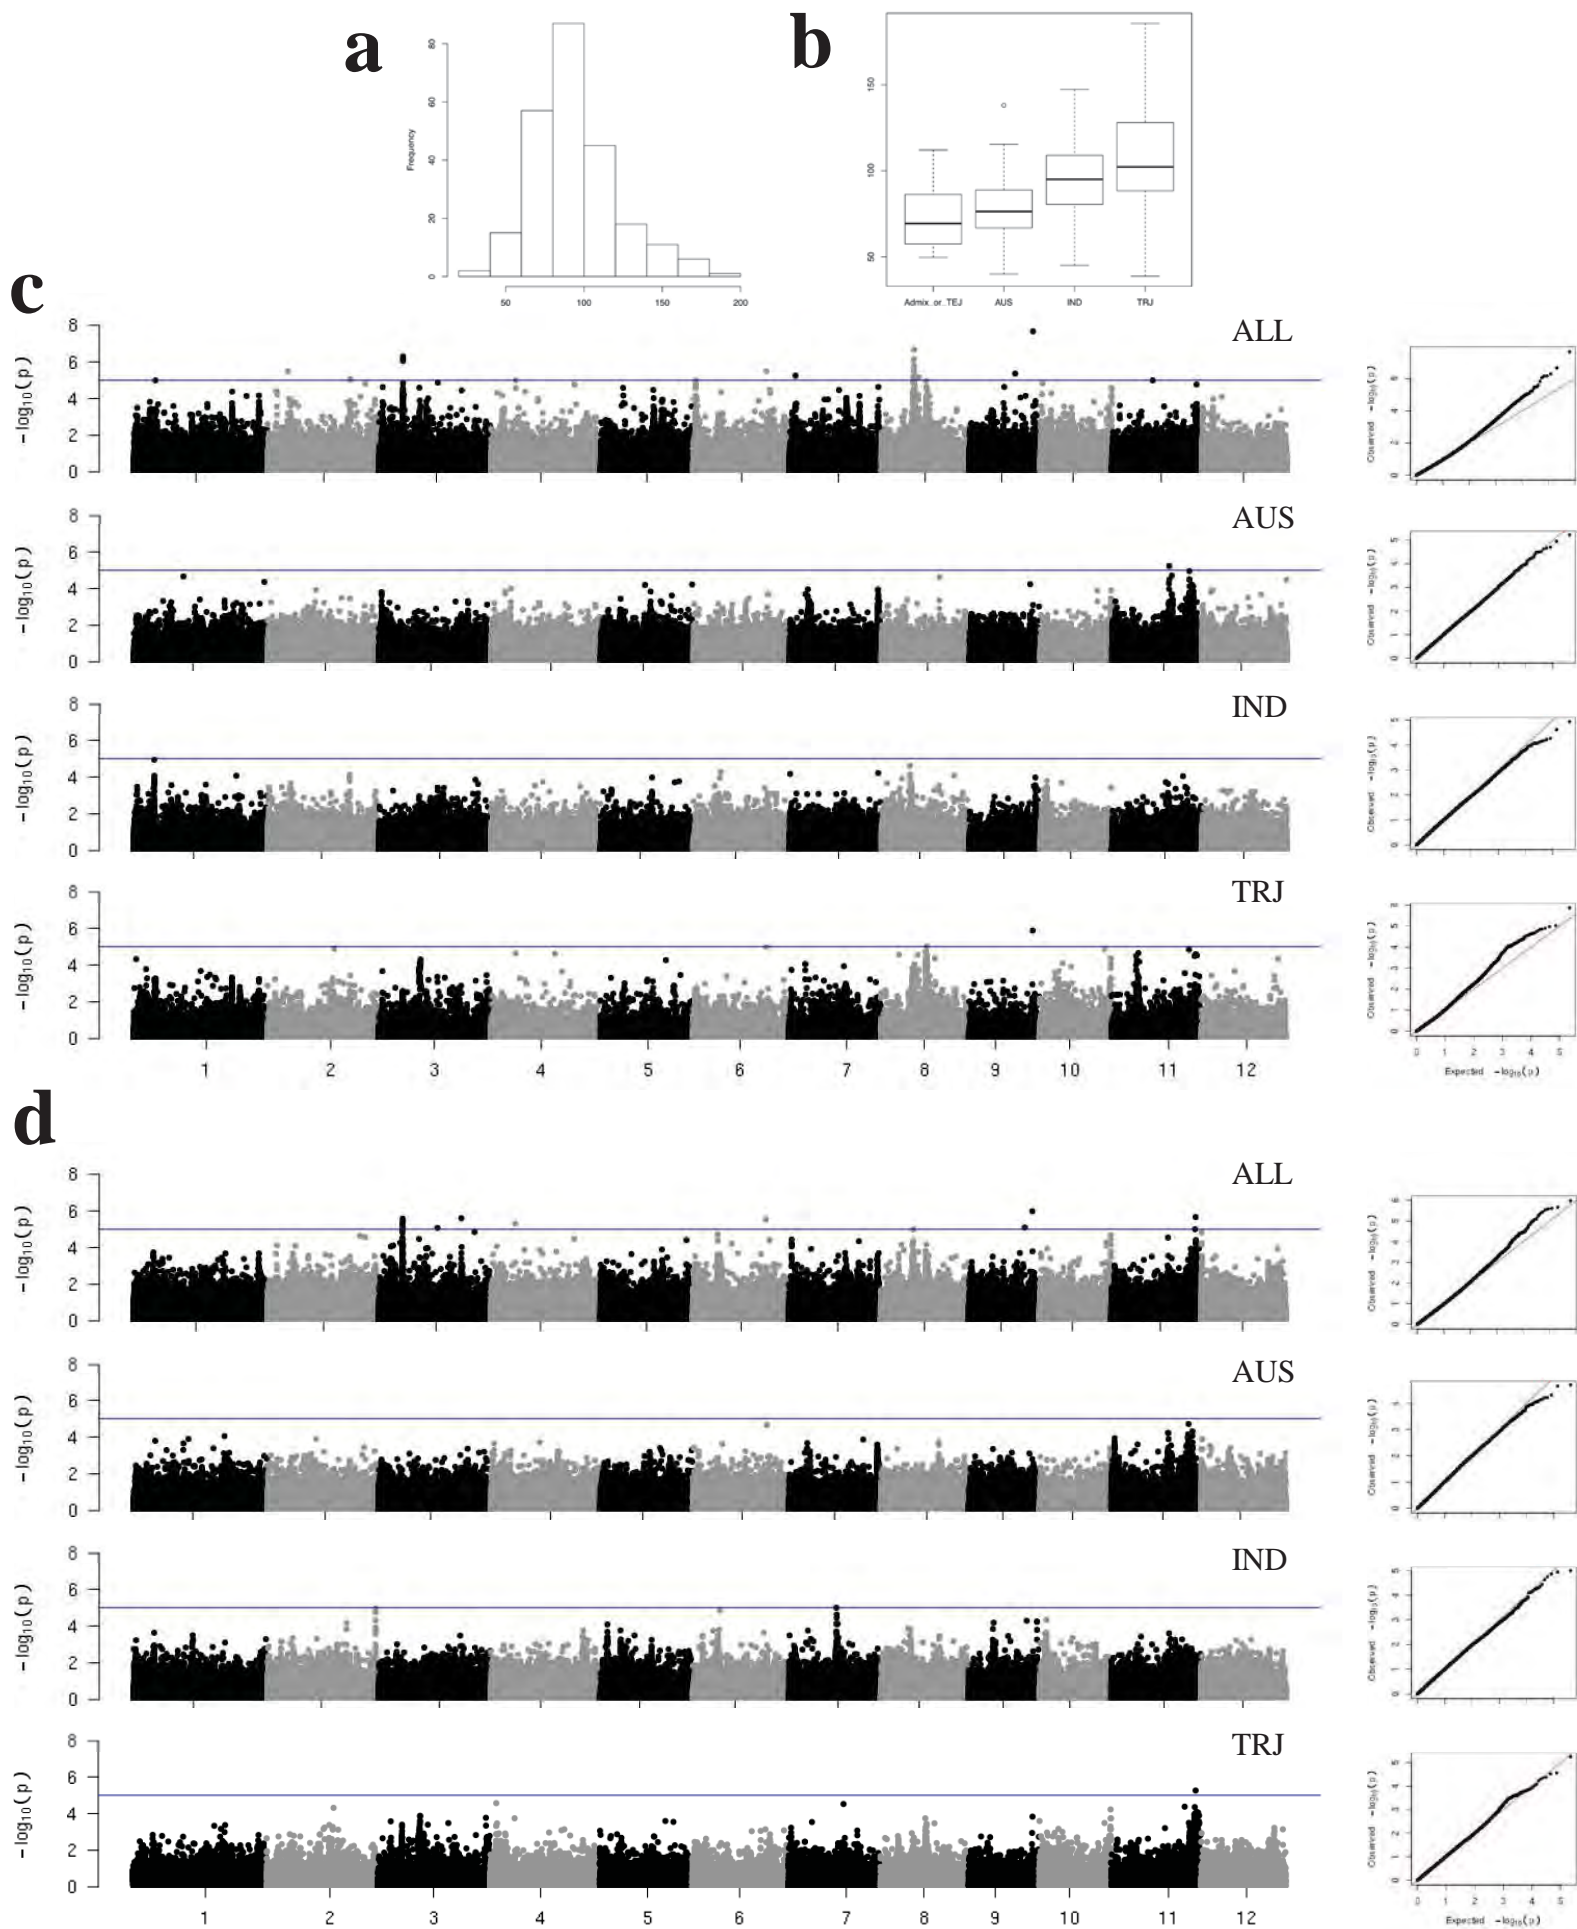

**Supplementary Figure 30. Summary of GWAS results for Total Primary Branch Length (cm).** (a, b) Phenotypic distributions. (c) Mixed model controlling for subpopulation structure across all varieties (ALL) and within individual subpopulations (AUS = *aus*, IND = *indica*, TRJ = *tropical japonica*). (d) Mixed model with heading date as a covariate.



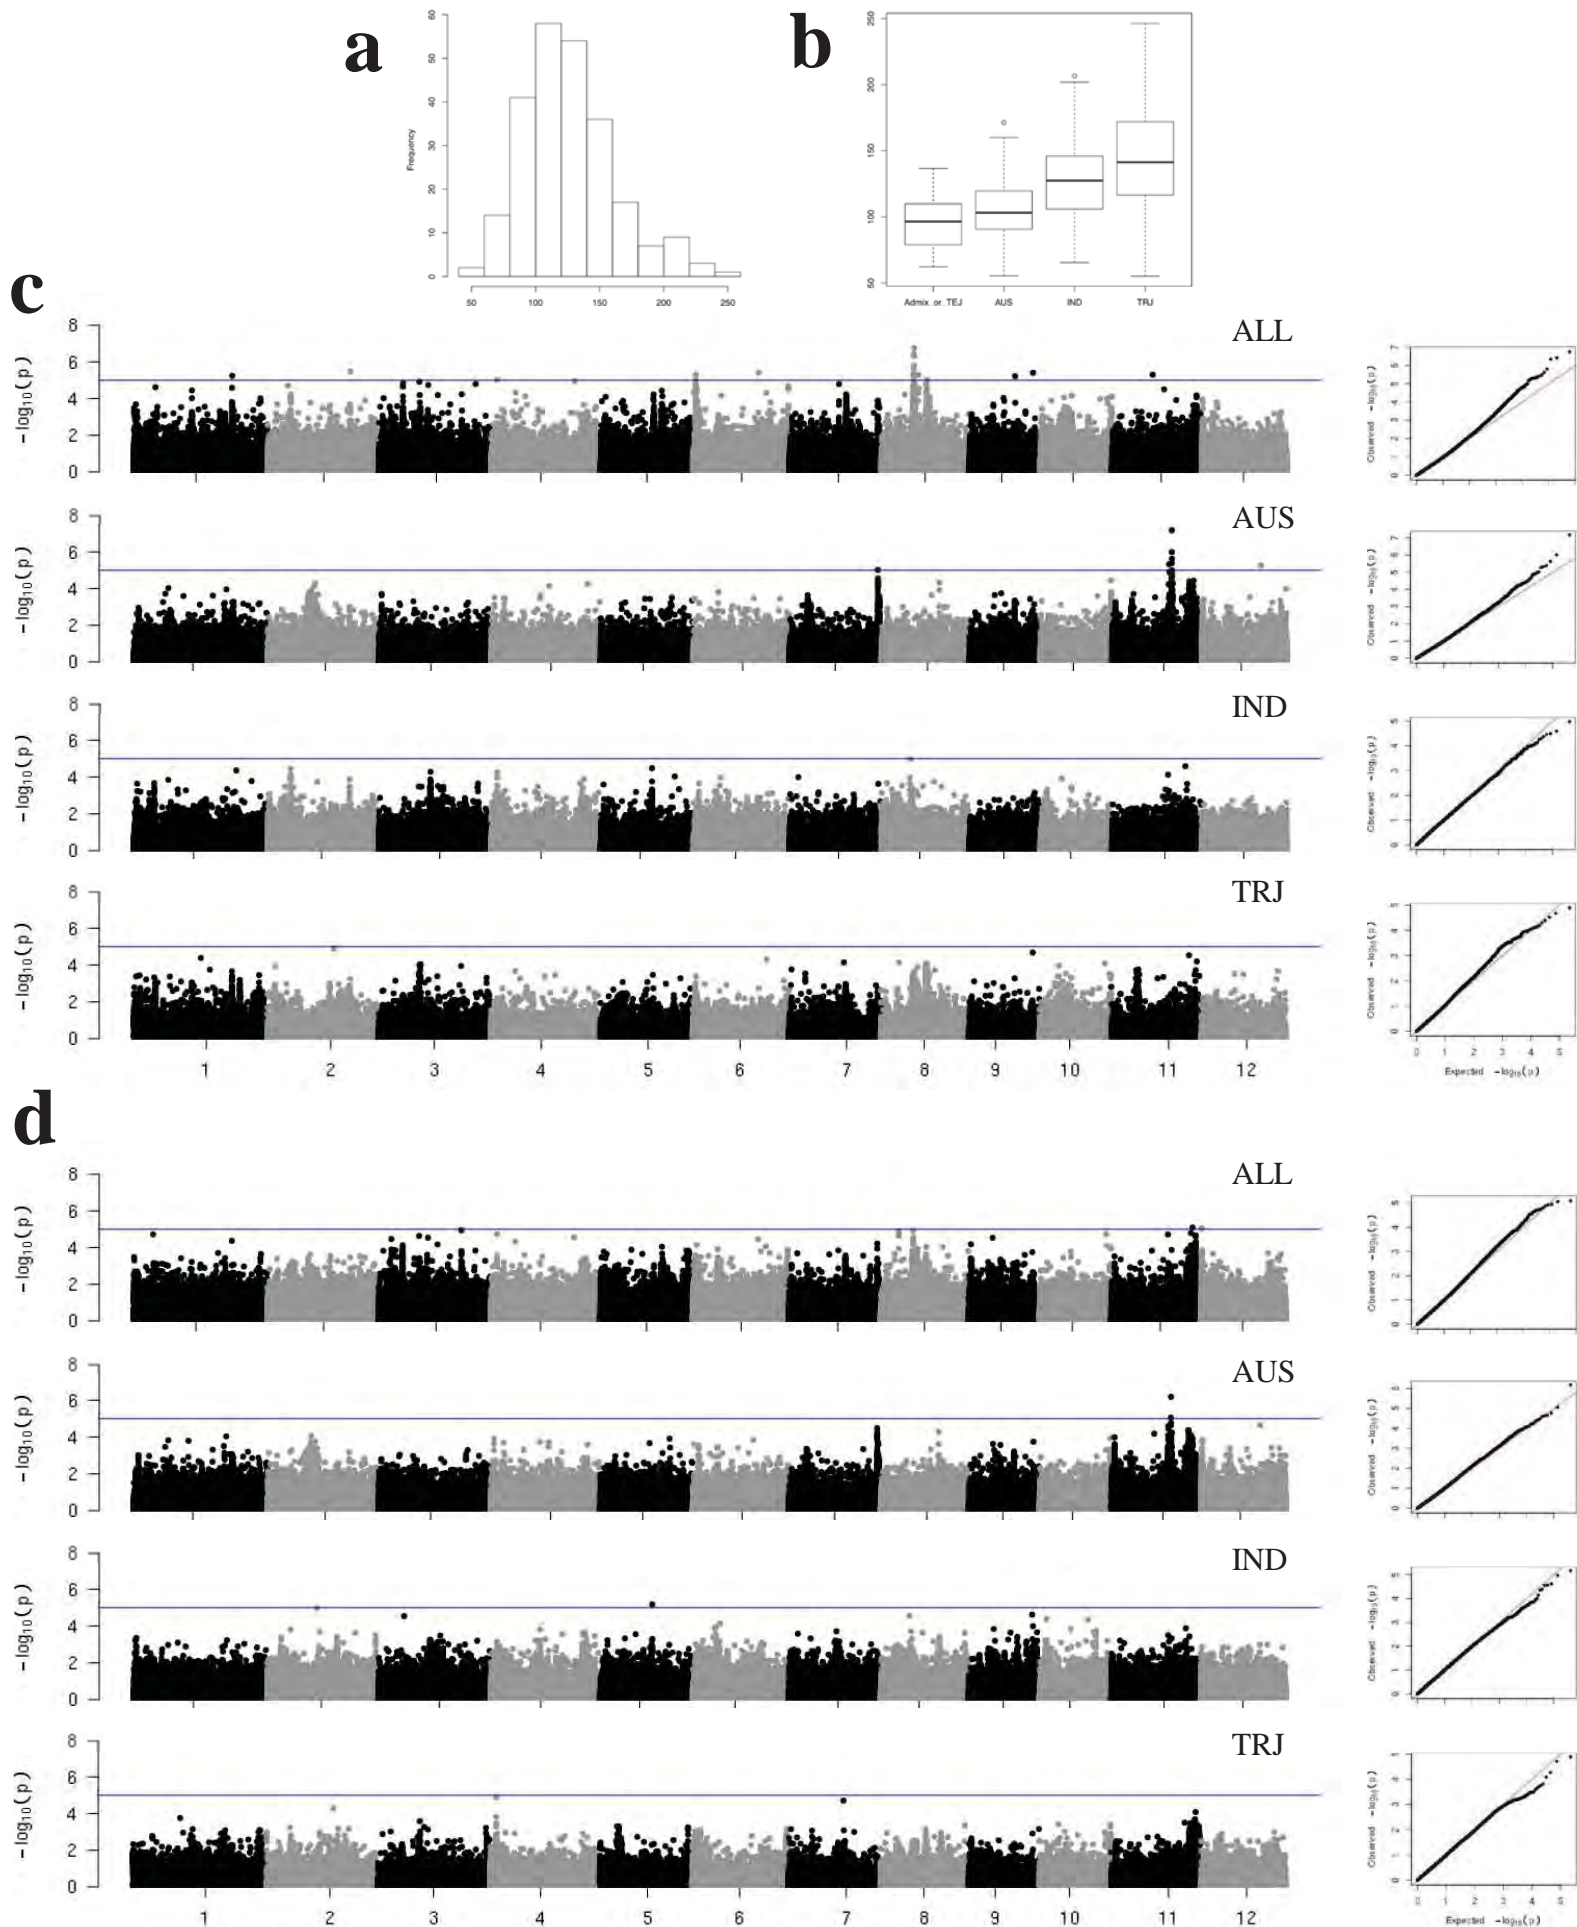

**Supplementary Figure 31. Summary of GWAS results for Maximum Total Primary Branch Length (cm).** (a, b) Phenotypic distributions. (c) Mixed model controlling for subpopulation structure across all varieties (ALL) and within individual subpopulations (AUS = *aus*, IND = *indica*, TRJ = *tropical japonica*). (d) Mixed model with heading date as a covariate.

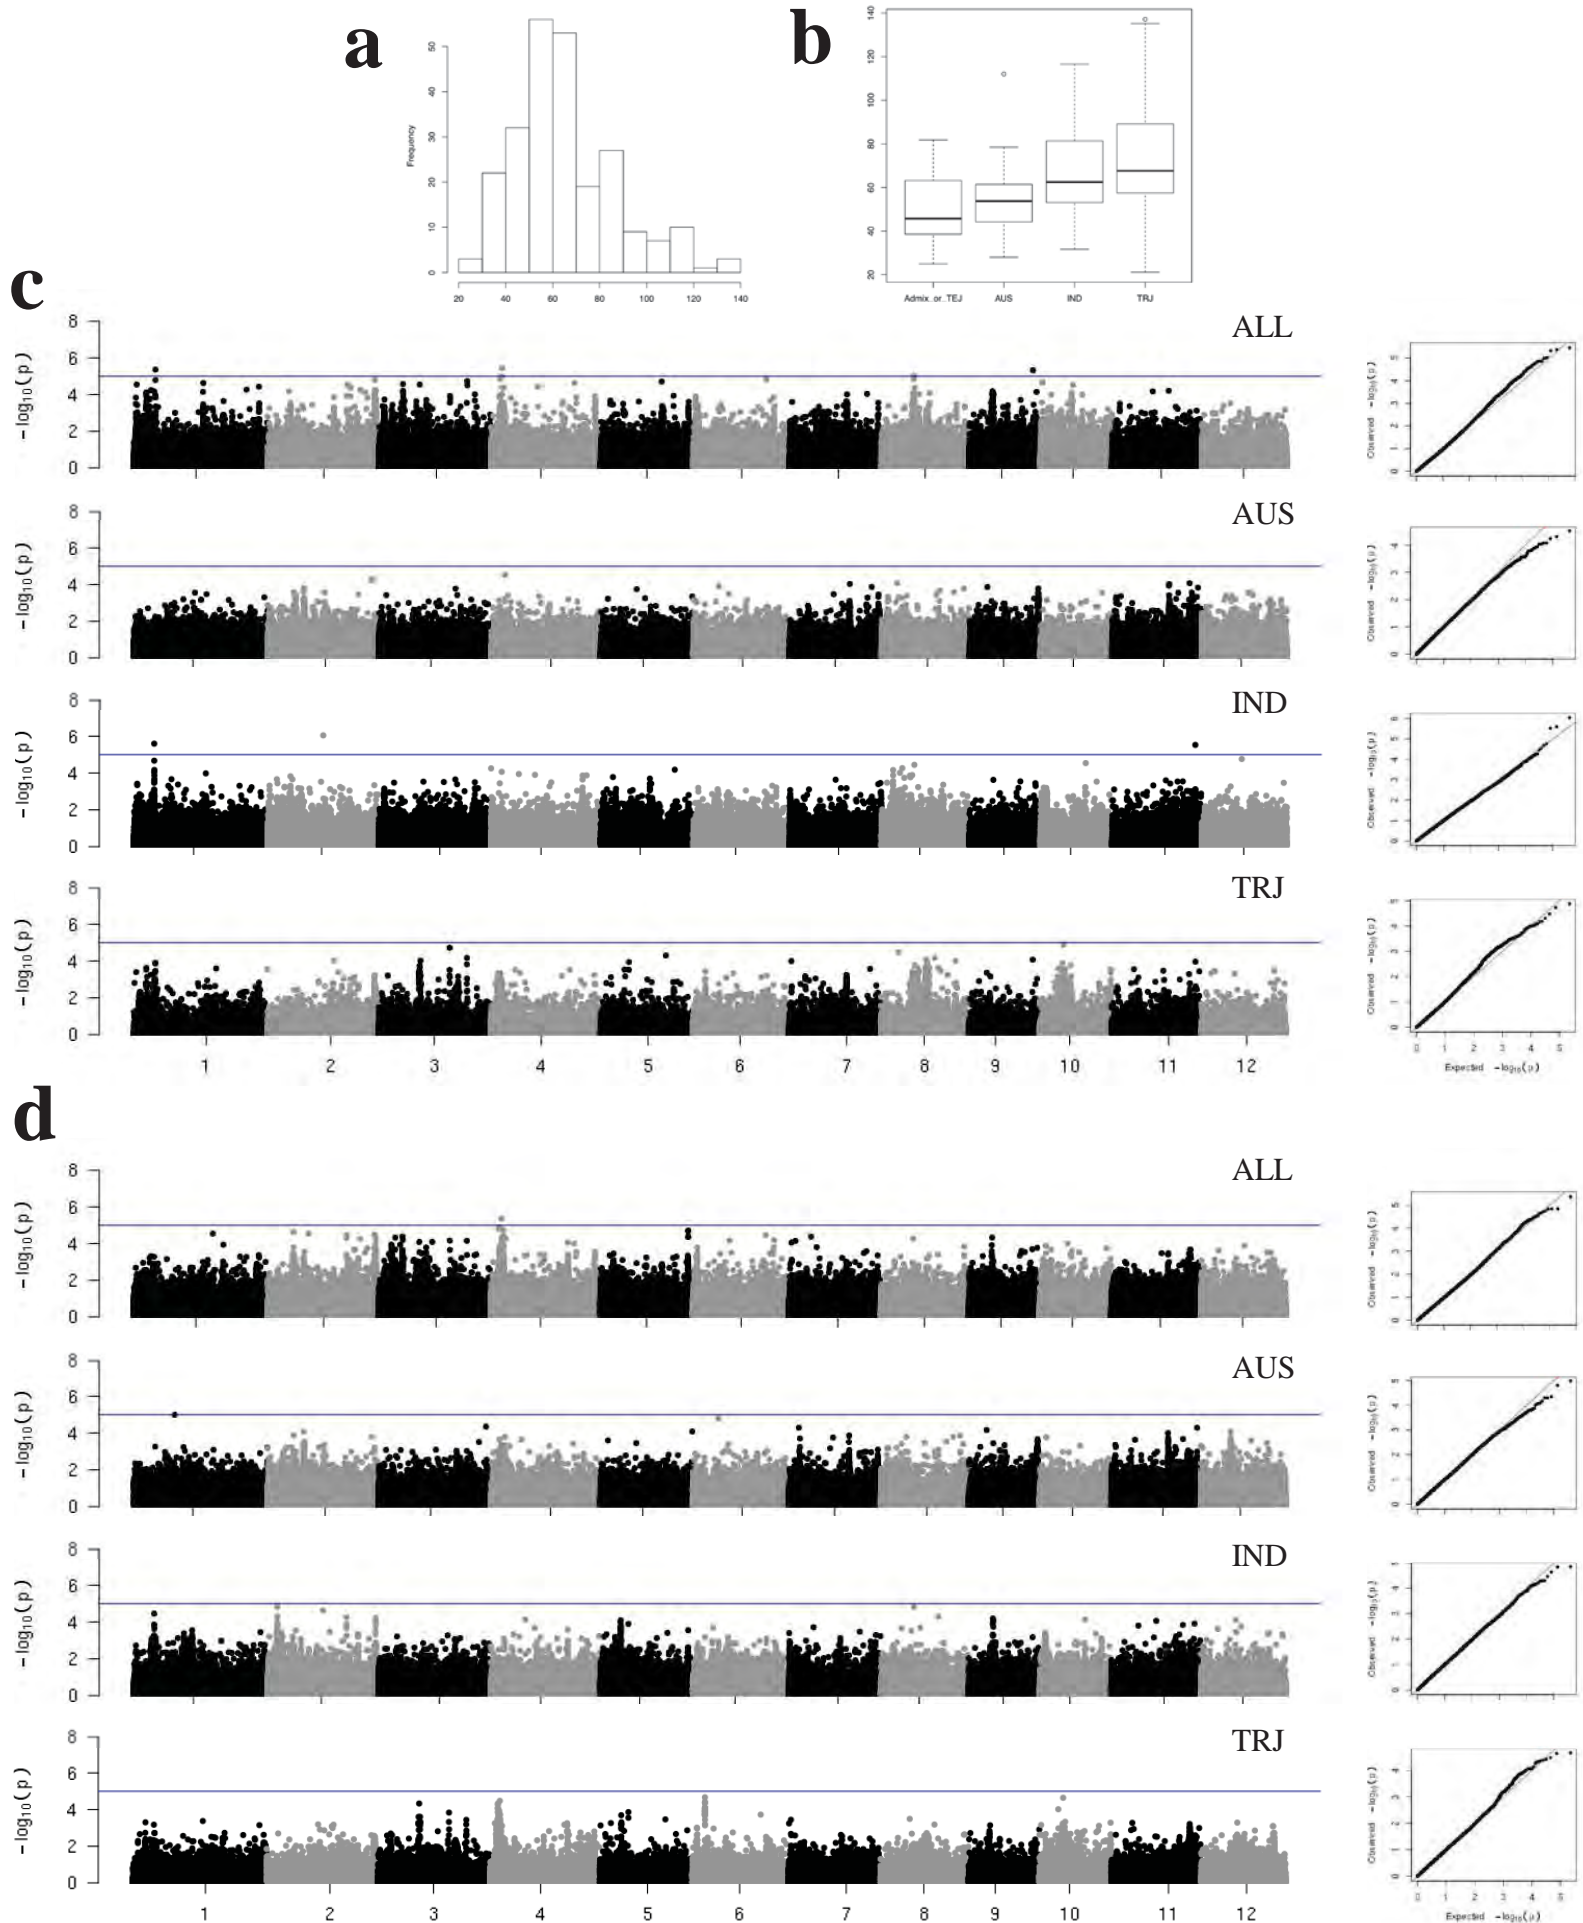

**Supplementary Figure 32. Summary of GWAS results for Minimum Total Primary Branch Length (cm).** (a, b) Phenotypic distributions. (c) Mixed model controlling for subpopulation structure across all varieties (ALL) and within individual subpopulations (AUS = *aus*, IND = *indica*, TRJ = *tropical japonica*). (d) Mixed model with heading date as a covariate.



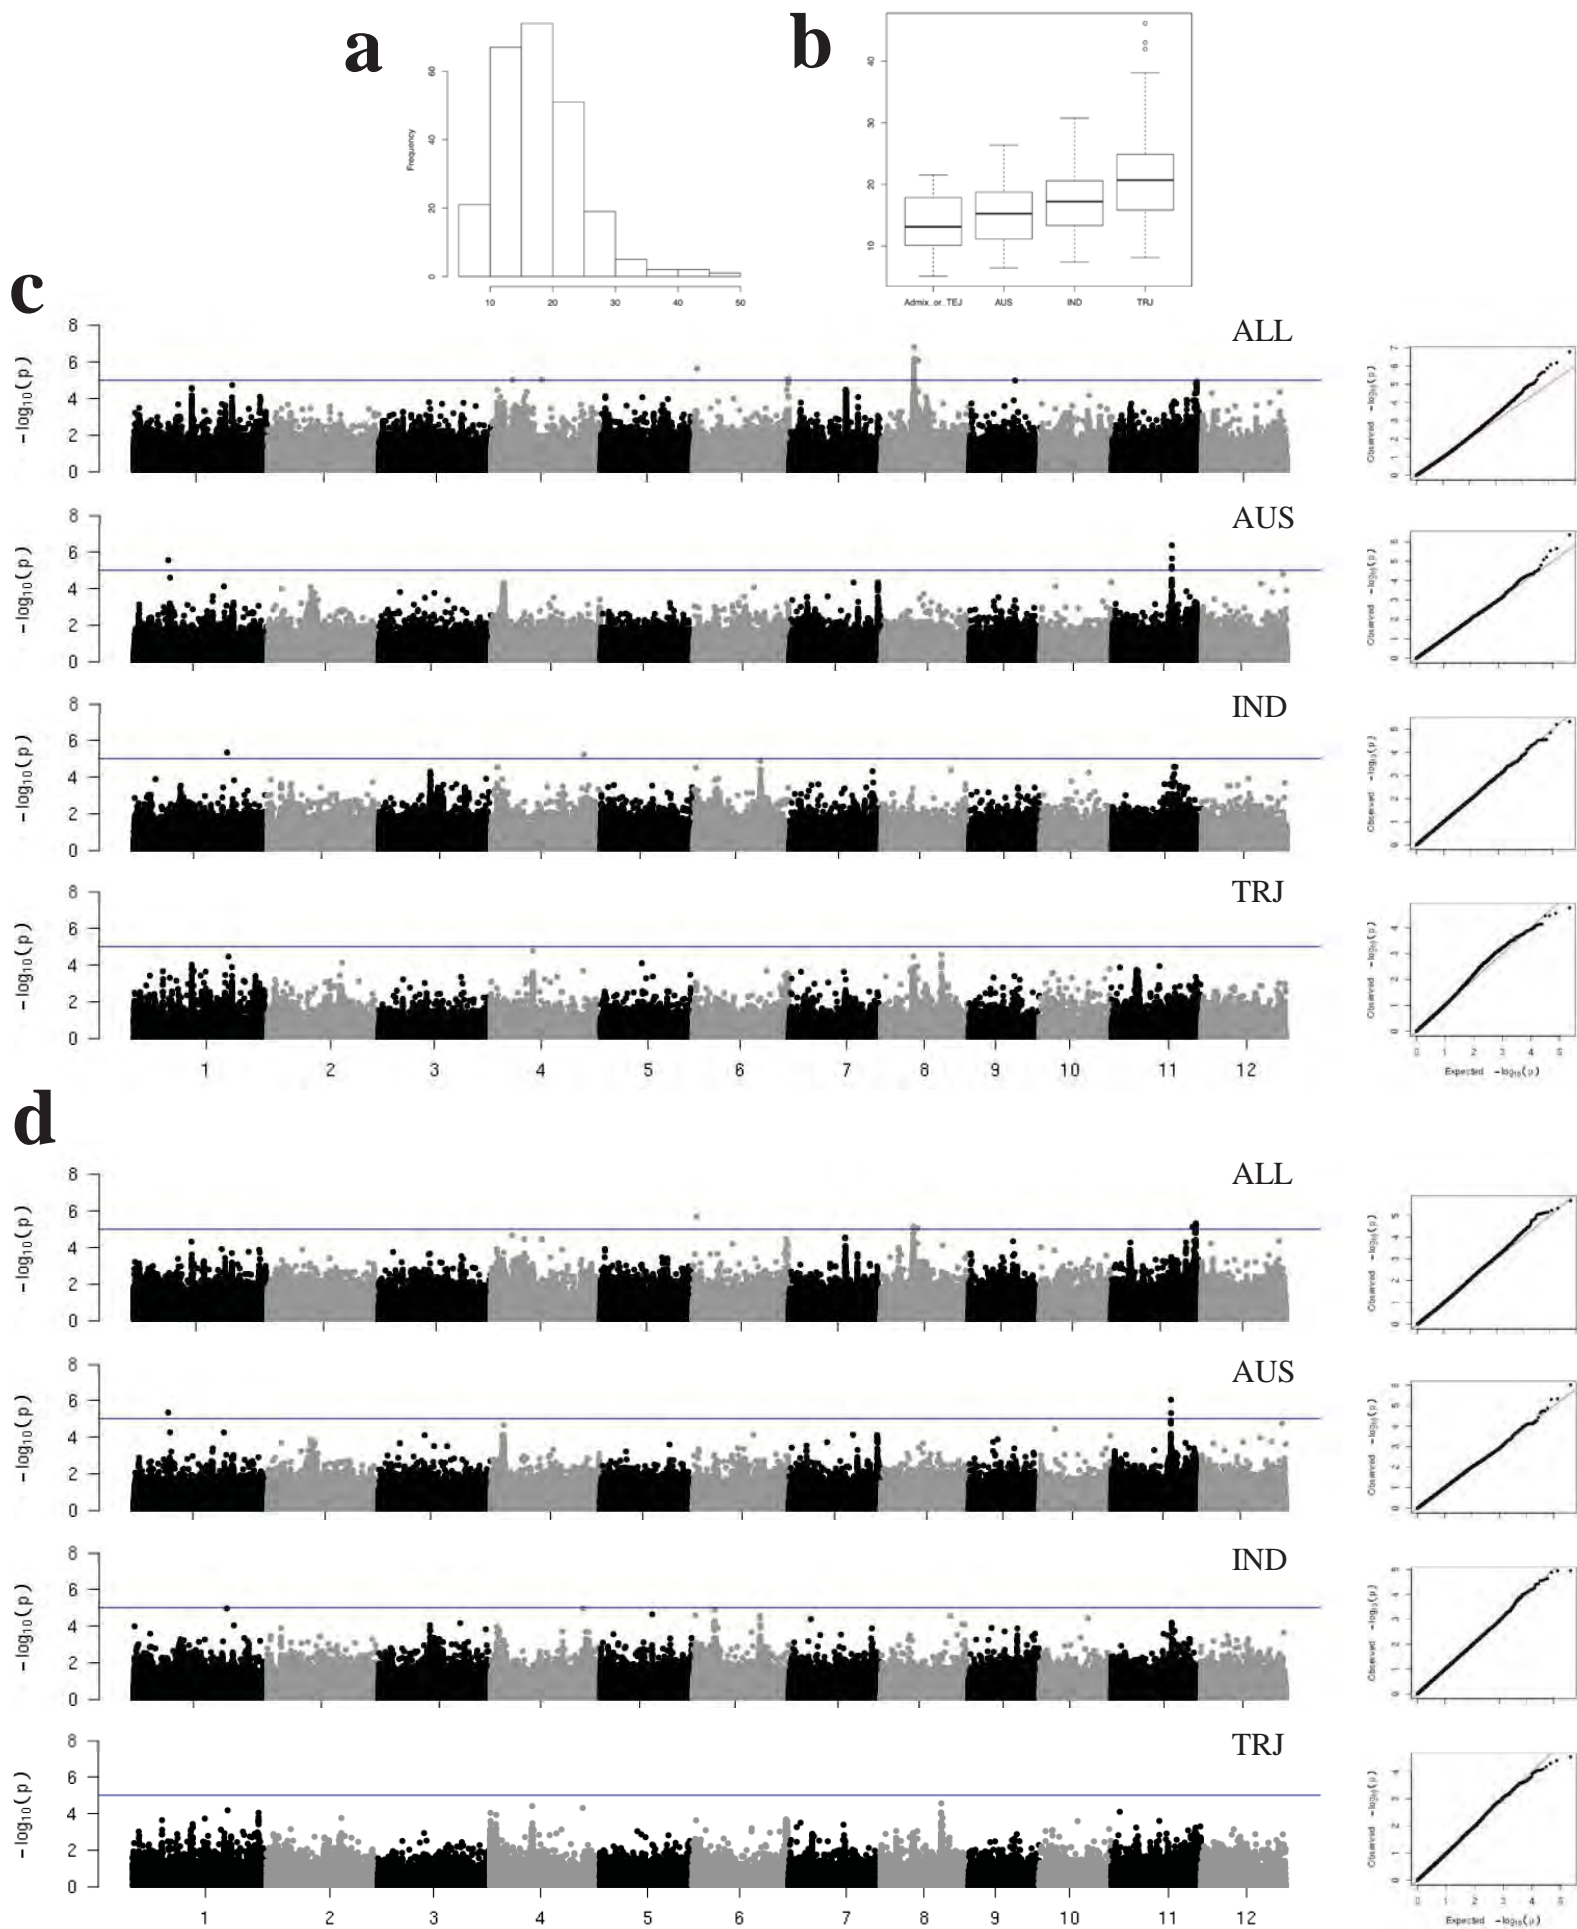

**Supplementary Figure 33. Summary of GWAS results for Total Primary Branch Length Standard Deviation (cm).** (a, b) Phenotypic distributions. (c) Mixed model controlling for subpopulation structure across all varieties (ALL) and within individual subpopulations (AUS = *aus*, IND = *indica*, TRJ = *tropical japonica*). (d) Mixed model with heading date as a covariate.

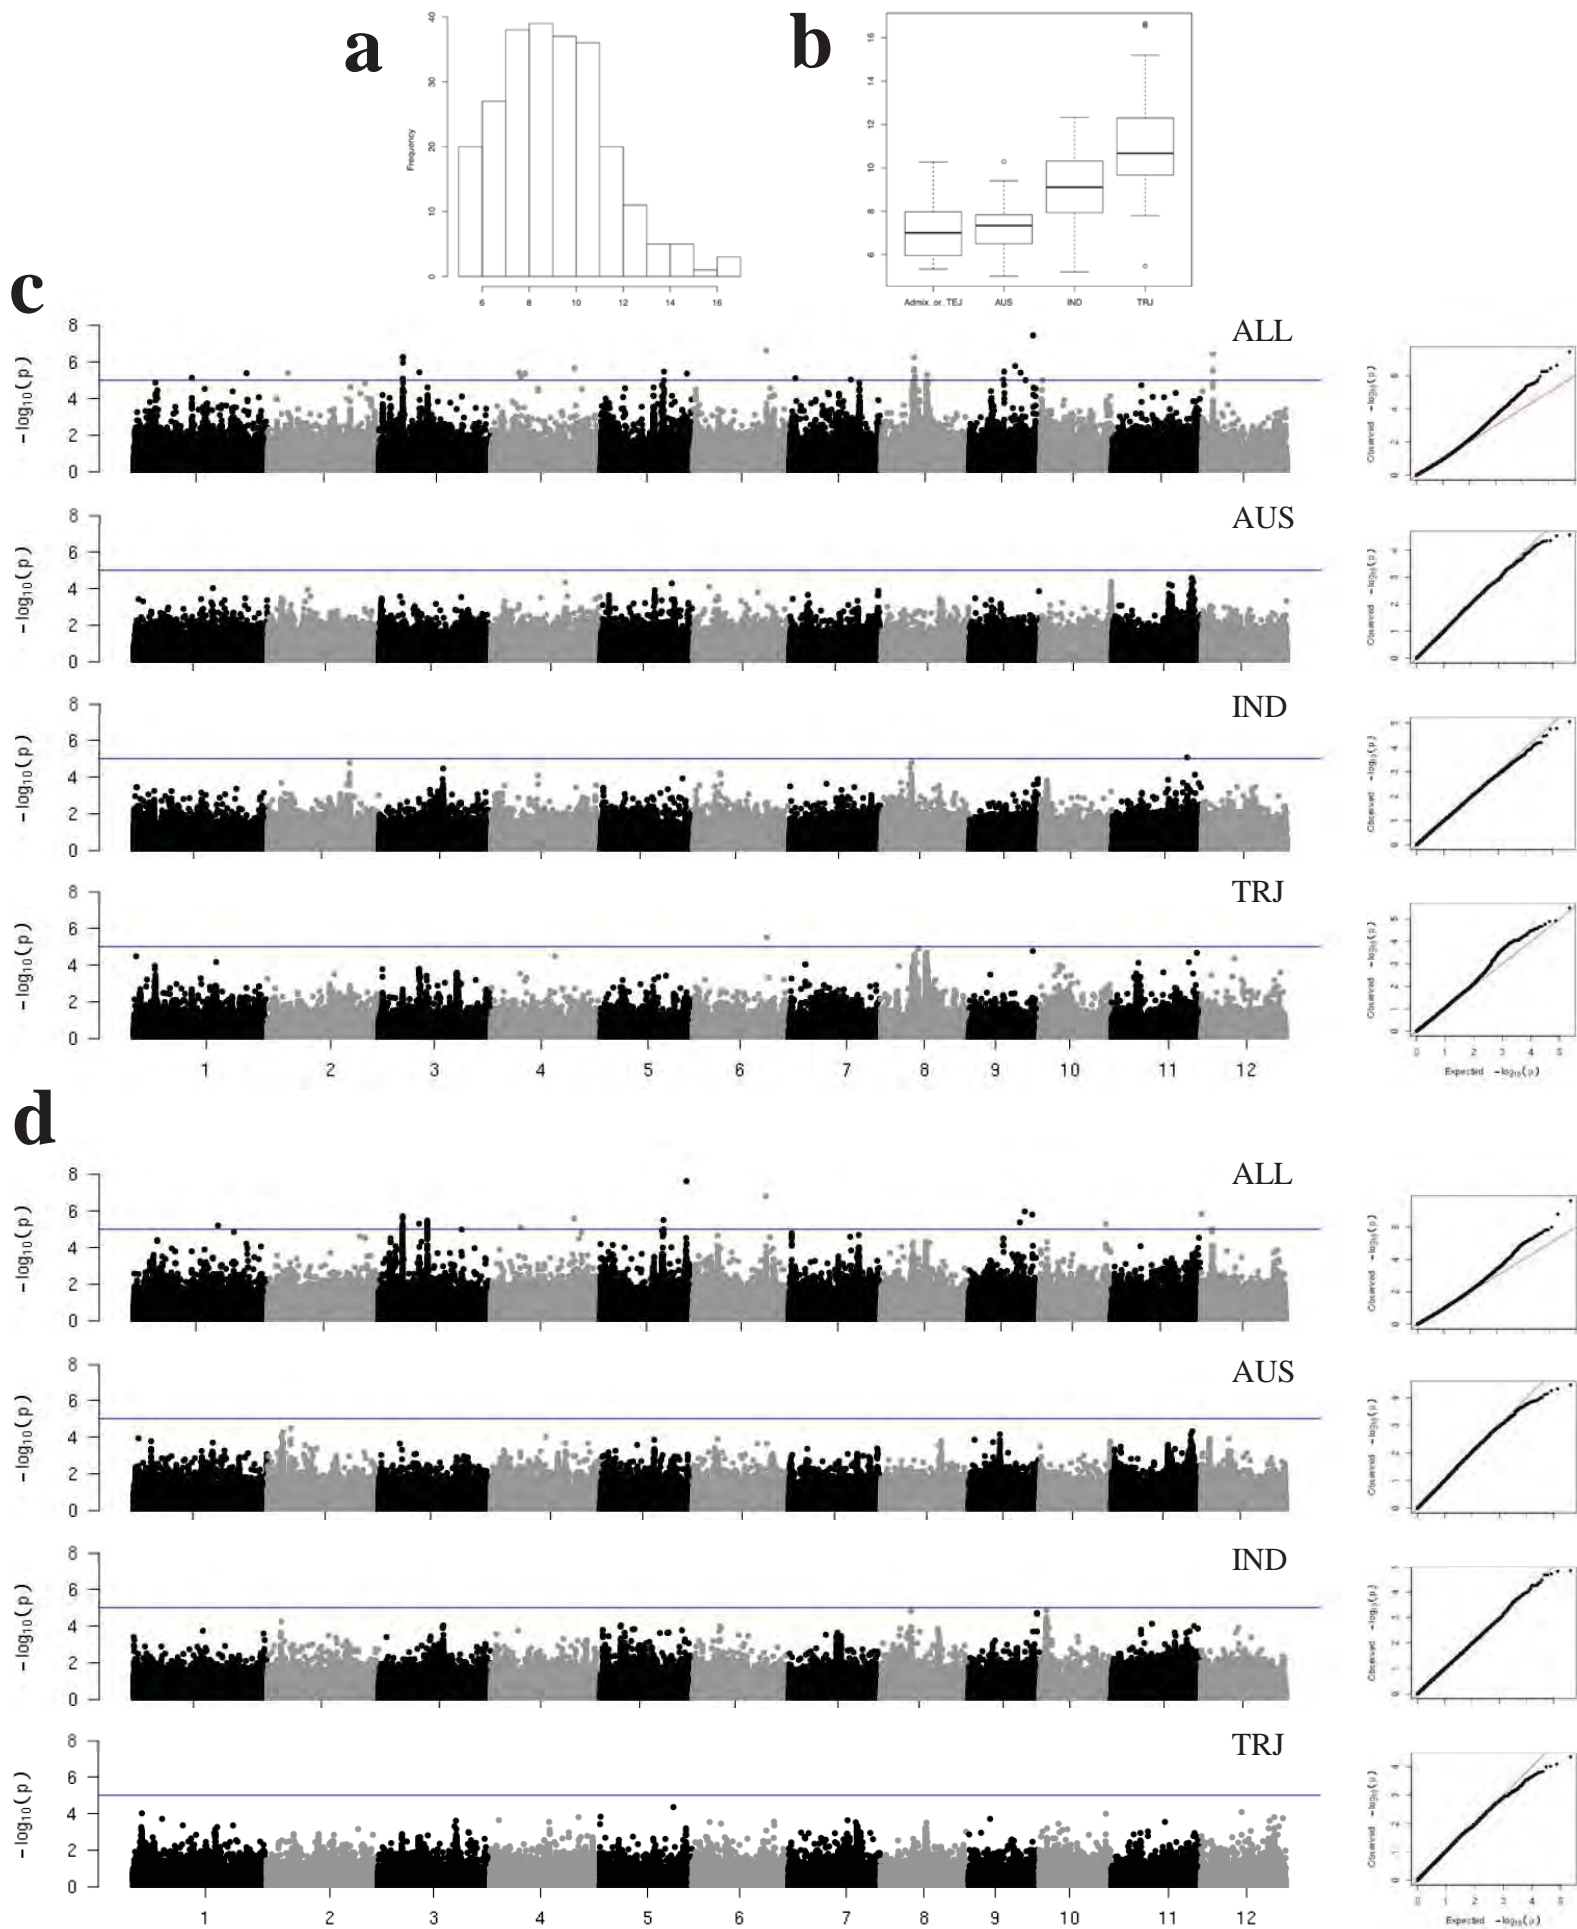

**Supplementary Figure 34. Summary of GWAS results for Primary Branch Number.** (a, b) Phenotypic distributions. (c) Mixed model controlling for subpopulation structure across all varieties (ALL) and within individual subpopulations (AUS = *aus*, IND = *indica*, TRJ = *tropical japonica*). (d) Mixed model with heading date as a covariate.



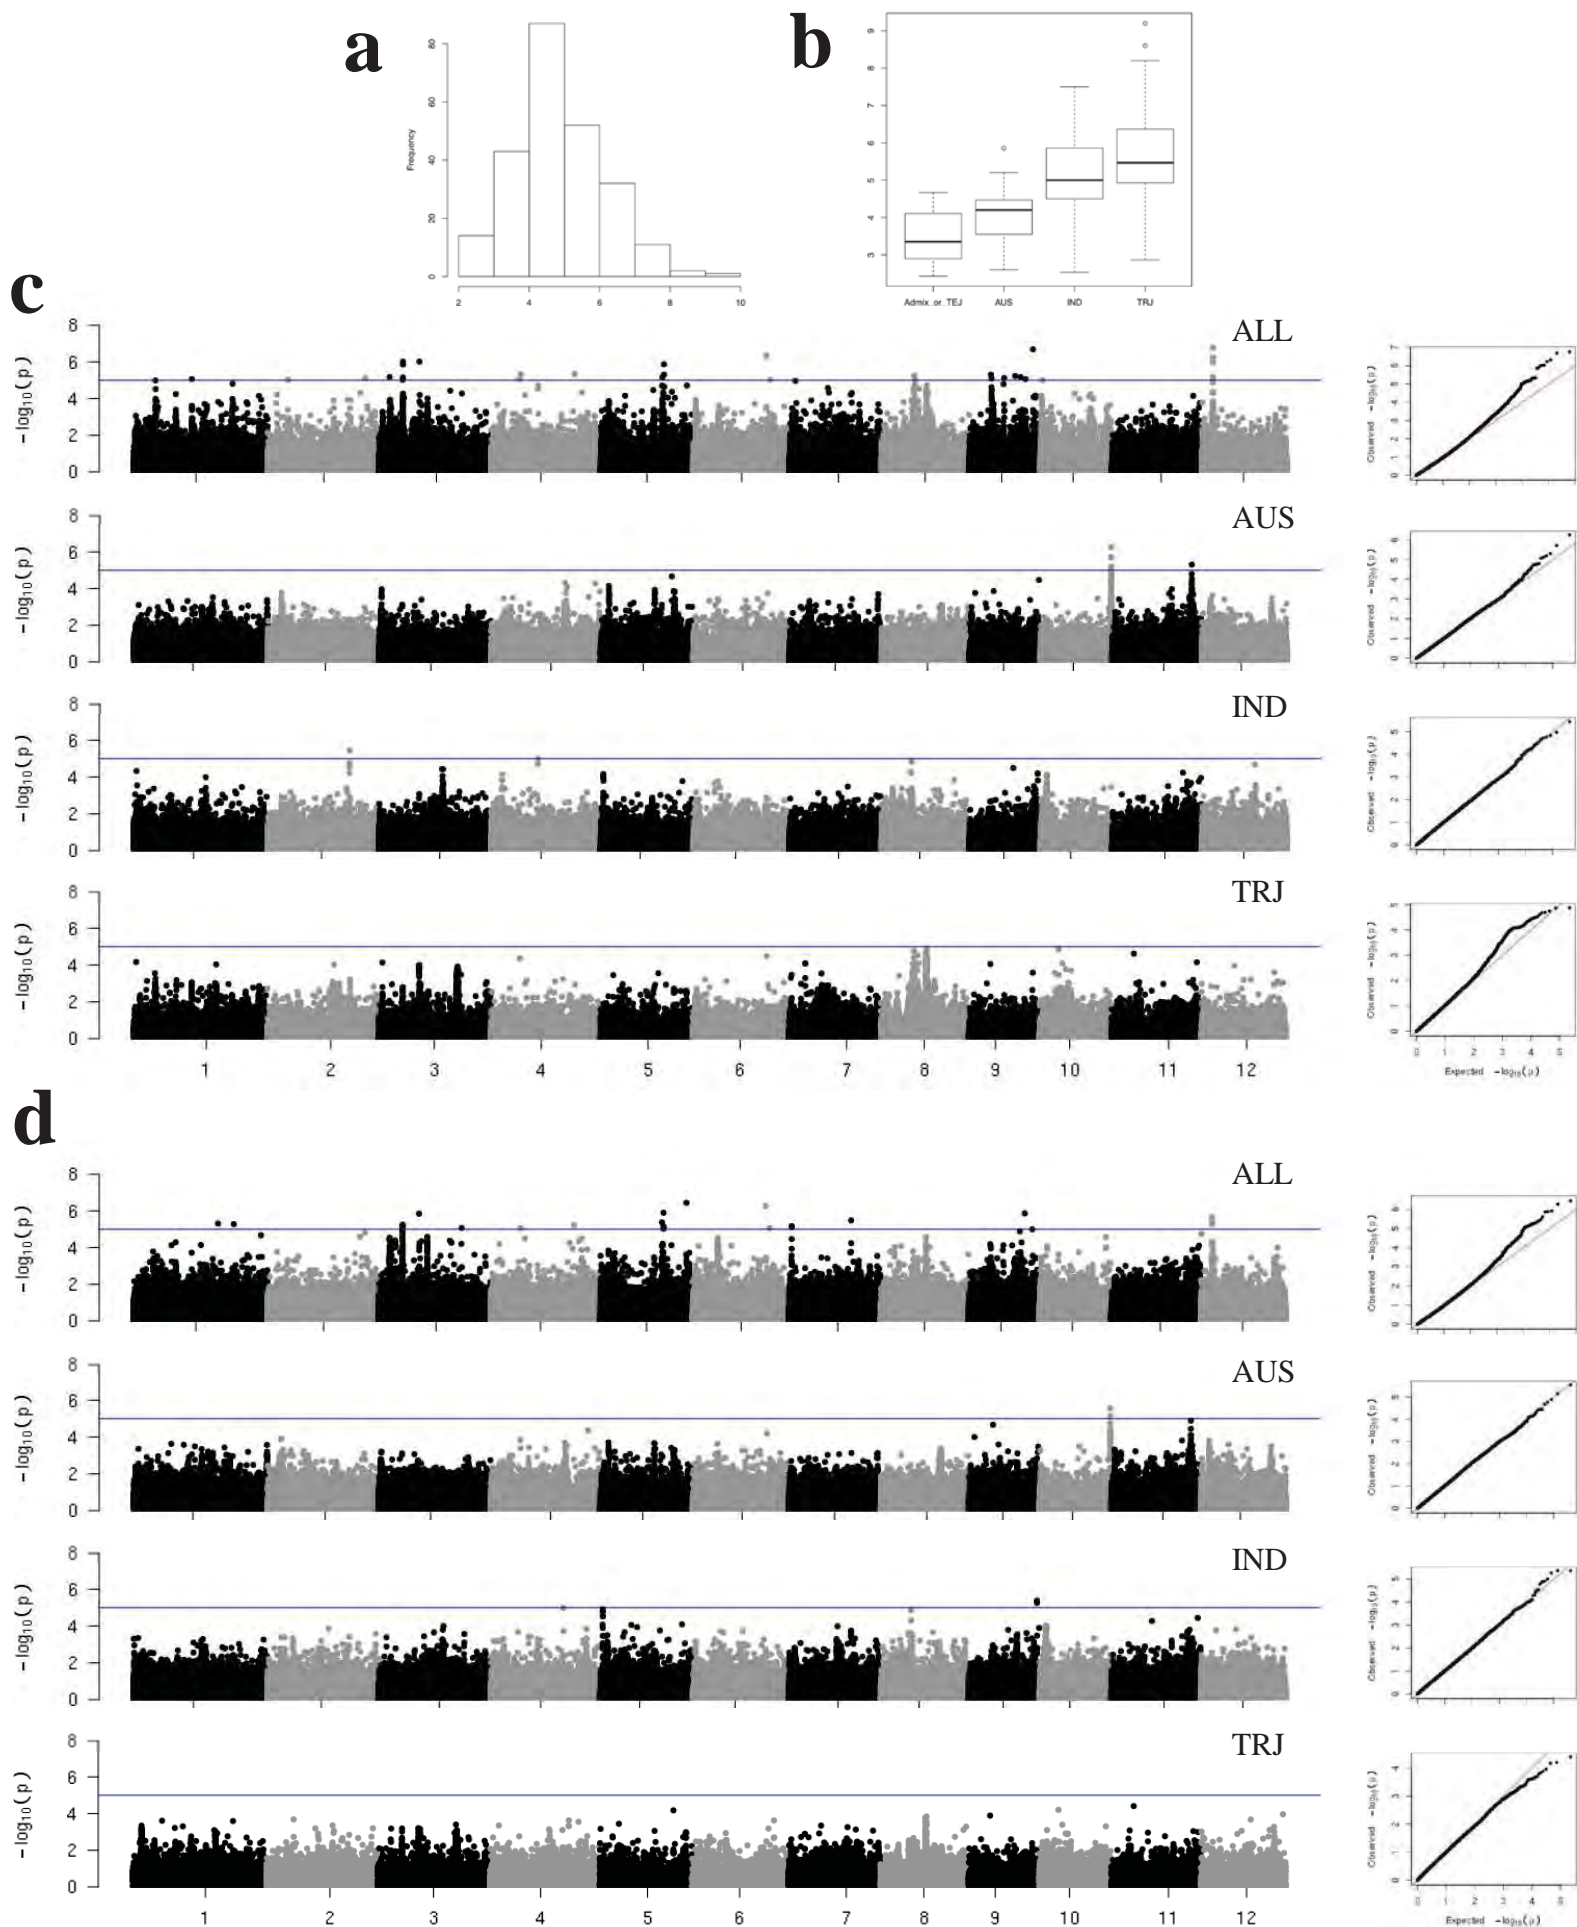

**Supplementary Figure 35. Summary of GWAS results Primary Branch Number in the Lower Half of the Panicle. (a, b)** Phenotypic distributions. **(c)** Mixed model controlling for subpopulation structure across all varieties (ALL) and within individual subpopulations (AUS = *aus*, IND = *indica*, TRJ = *tropical japonica*). **(d)** Mixed model with heading date as a covariate.

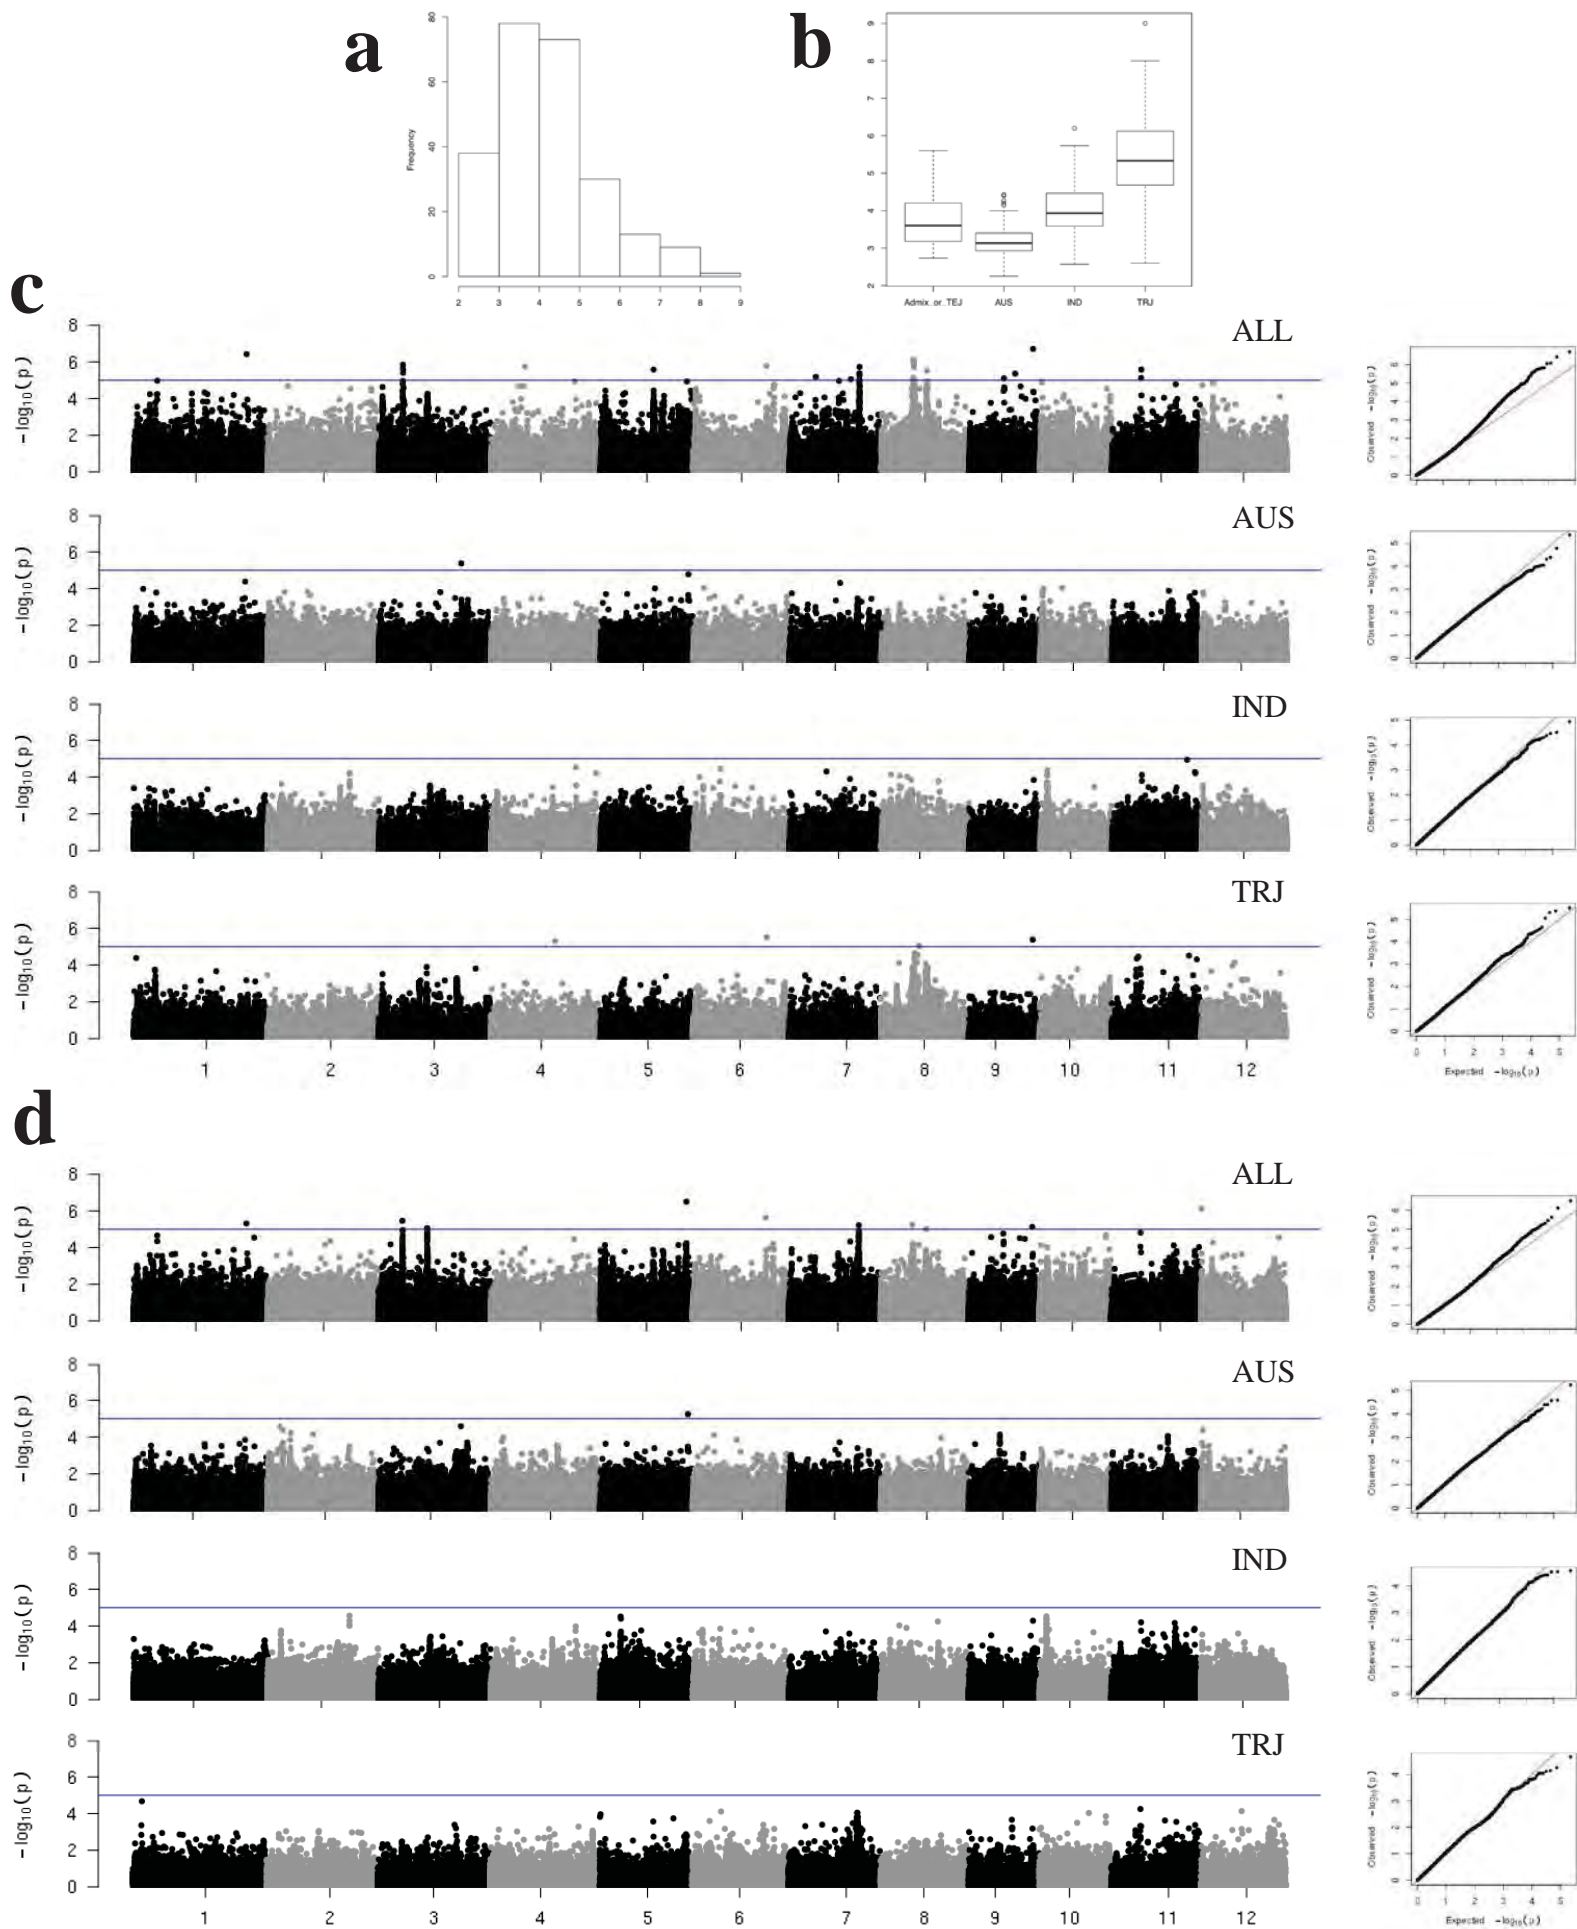

**Supplementary Figure 36. Summary of GWAS results for Primary Branch Number in the Upper Half of the Panicle. (a, b)** Phenotypic distributions. **(c)** Mixed model controlling for subpopulation structure across all varieties (ALL) and within individual subpopulations (AUS = *aus*, IND = *indica*, TRJ = *tropical japonica*). **(d)** Mixed model with heading date as a covariate.



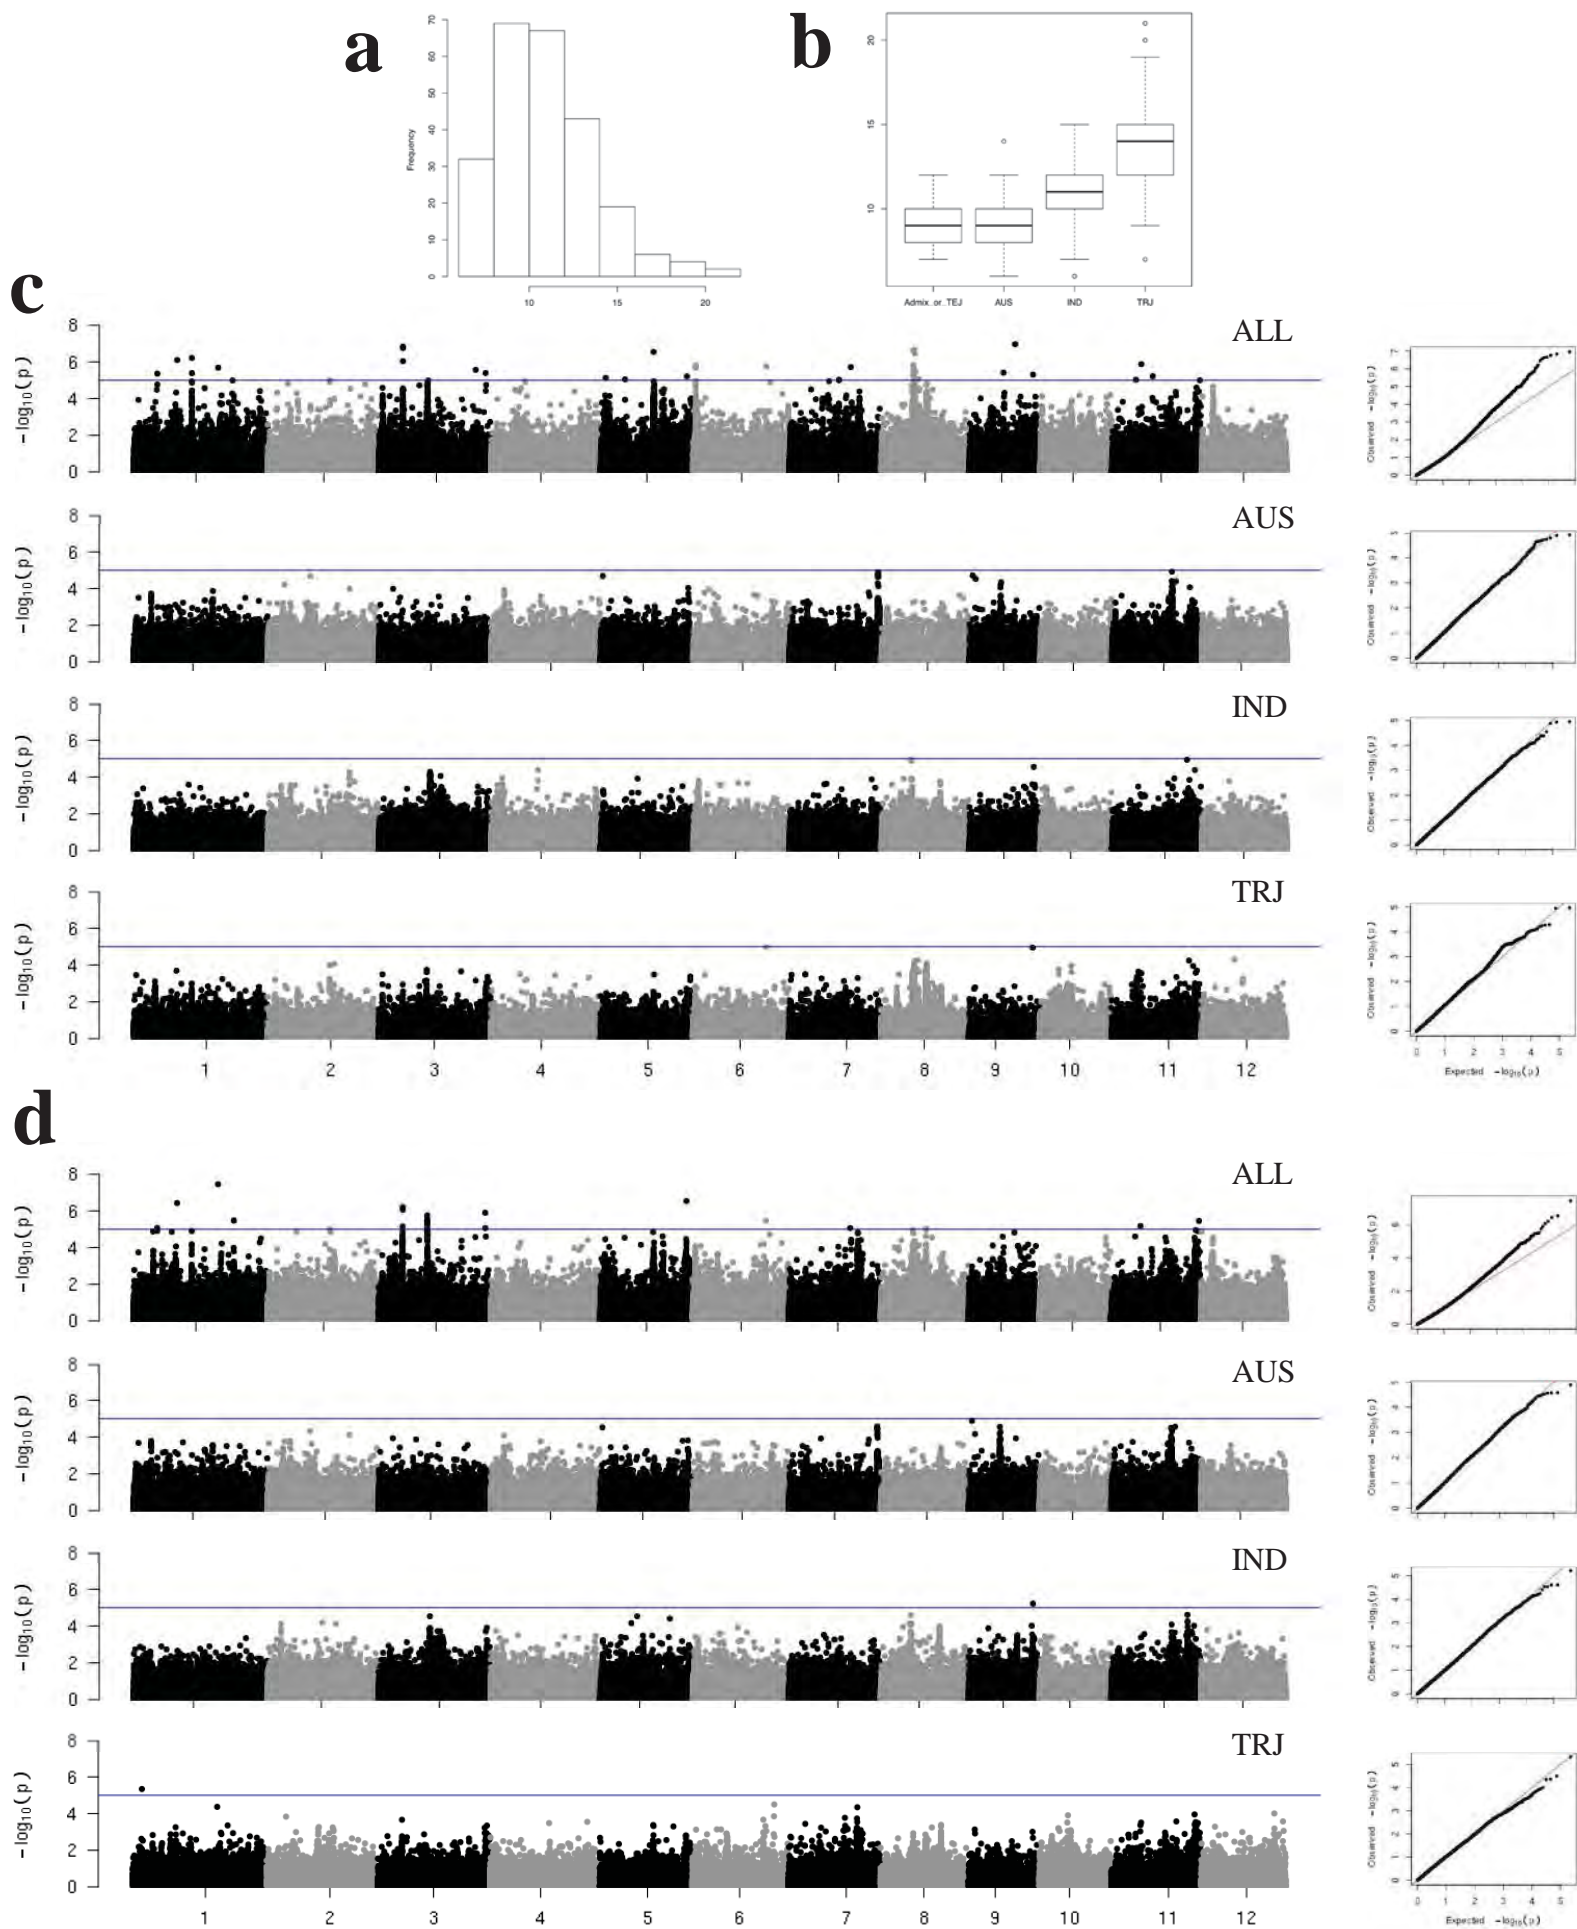

**Supplementary Figure 37. Summary of GWAS results for Maximum Primary Branch Number. (a, b) Phenotypic distributions. (c) Mixed model controlling for subpopulation structure across all varieties (ALL) and within individual subpopulations (AUS = *aus*, IND = *indica*, TRJ = *tropical japonica*). (d) Mixed model with heading date as a covariate.**

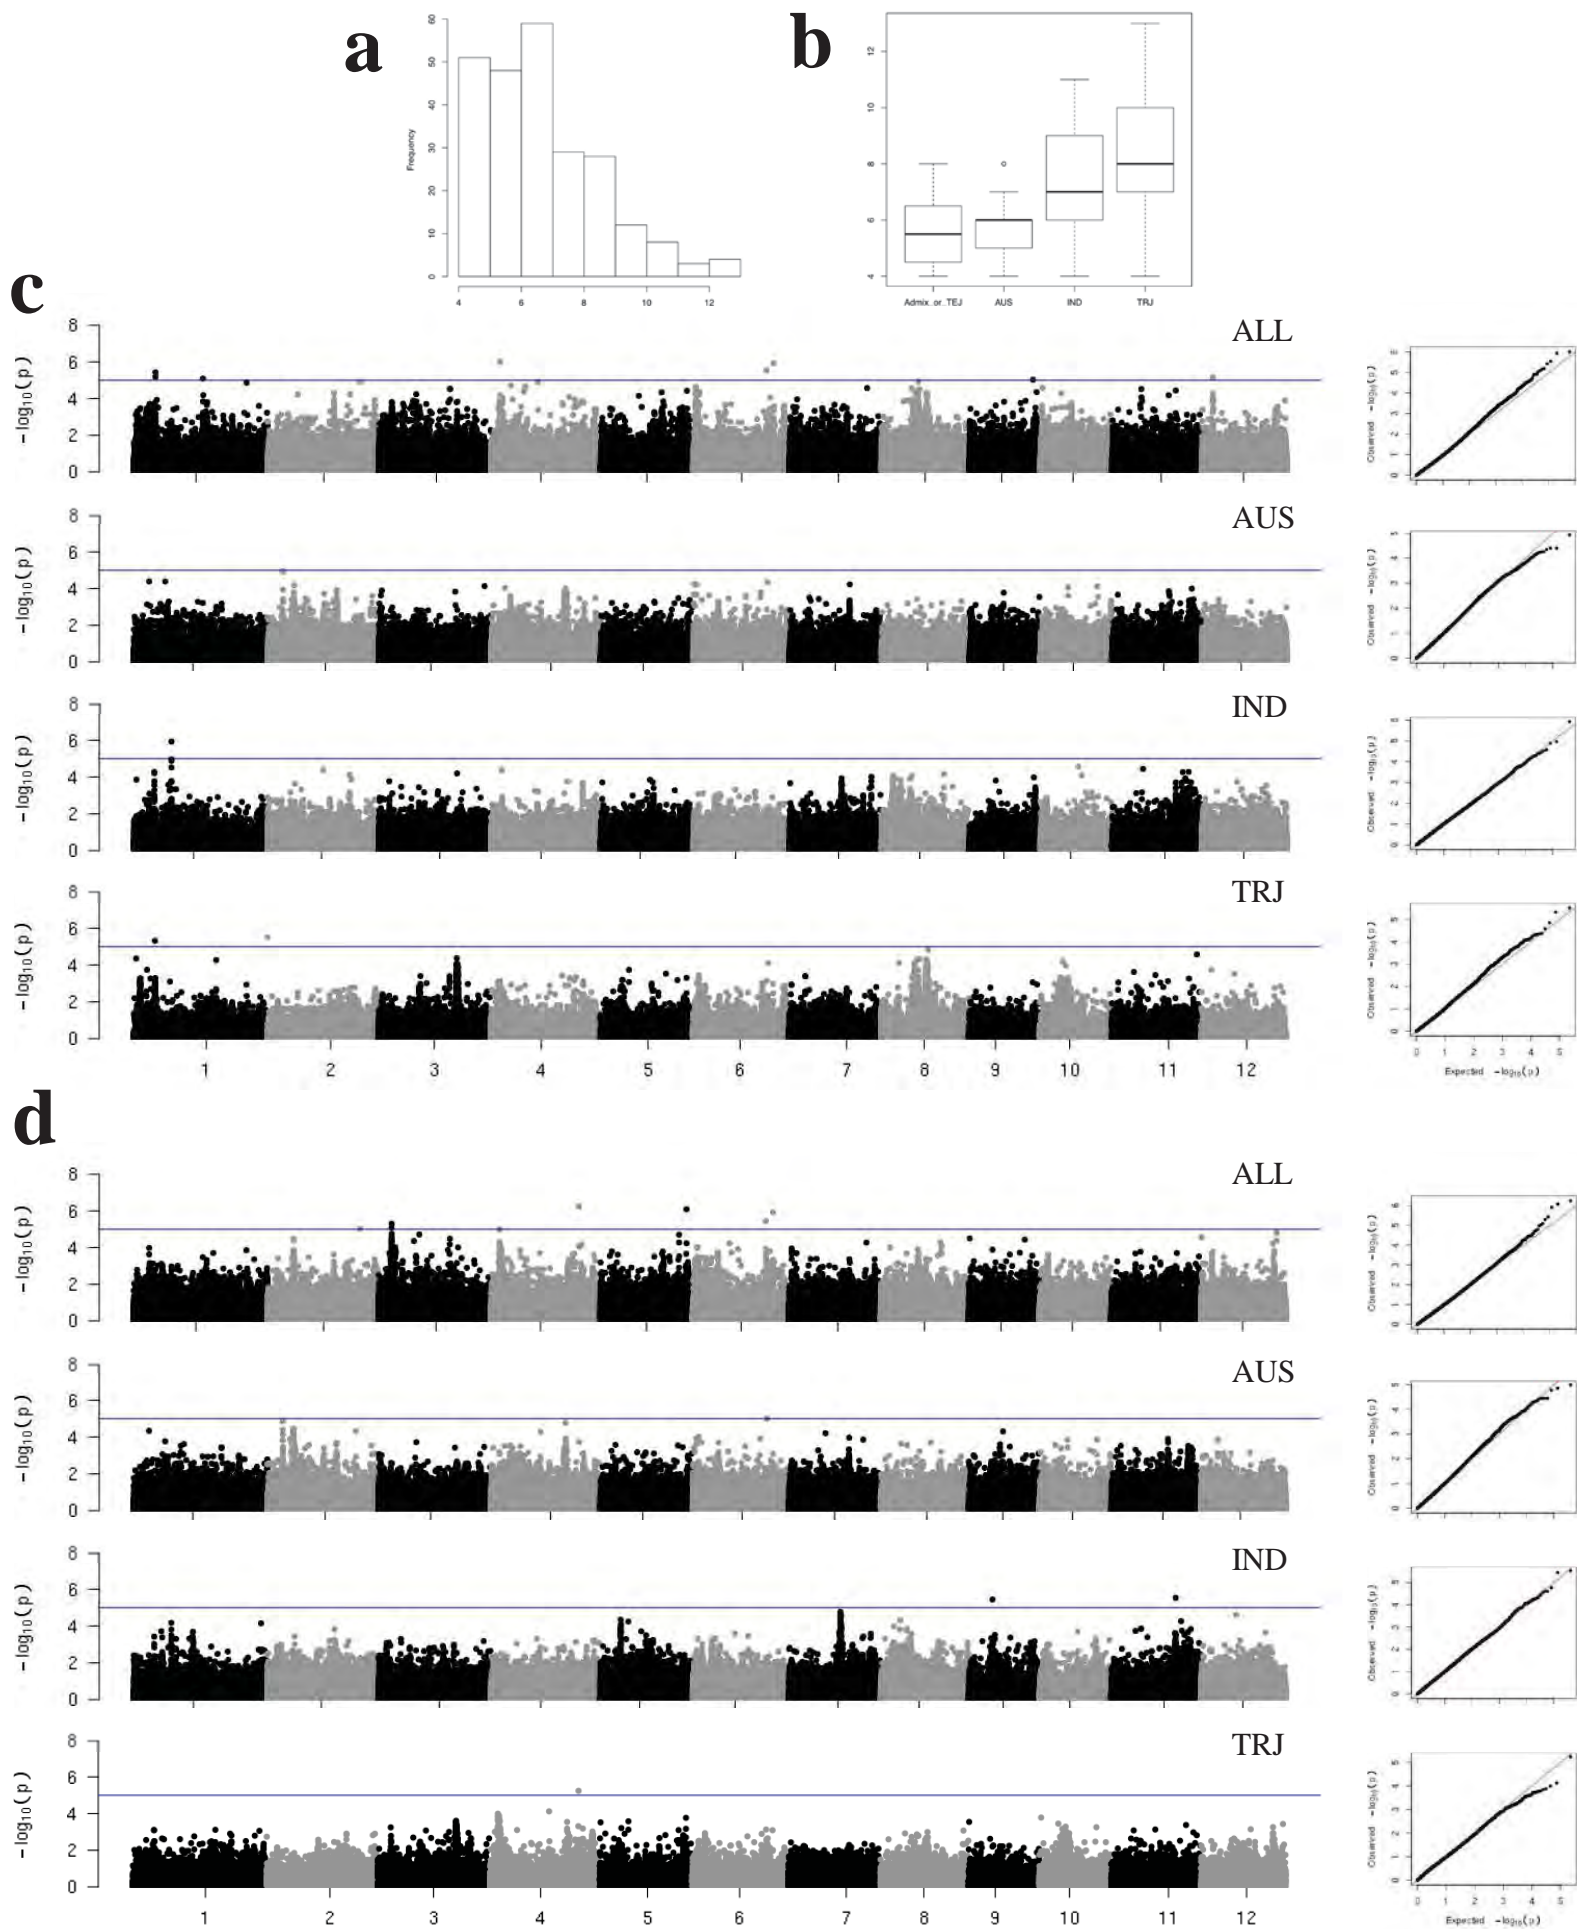

**Supplementary Figure 38. Summary of GWAS results for Minimum Primary Branch Number.** (a, b) Phenotypic distributions. (c) Mixed model controlling for subpopulation structure across all varieties (ALL) and within individual subpopulations (AUS = *aus*, IND = *indica*, TRJ = *tropical japonica*). (d) Mixed model with heading date as a covariate.



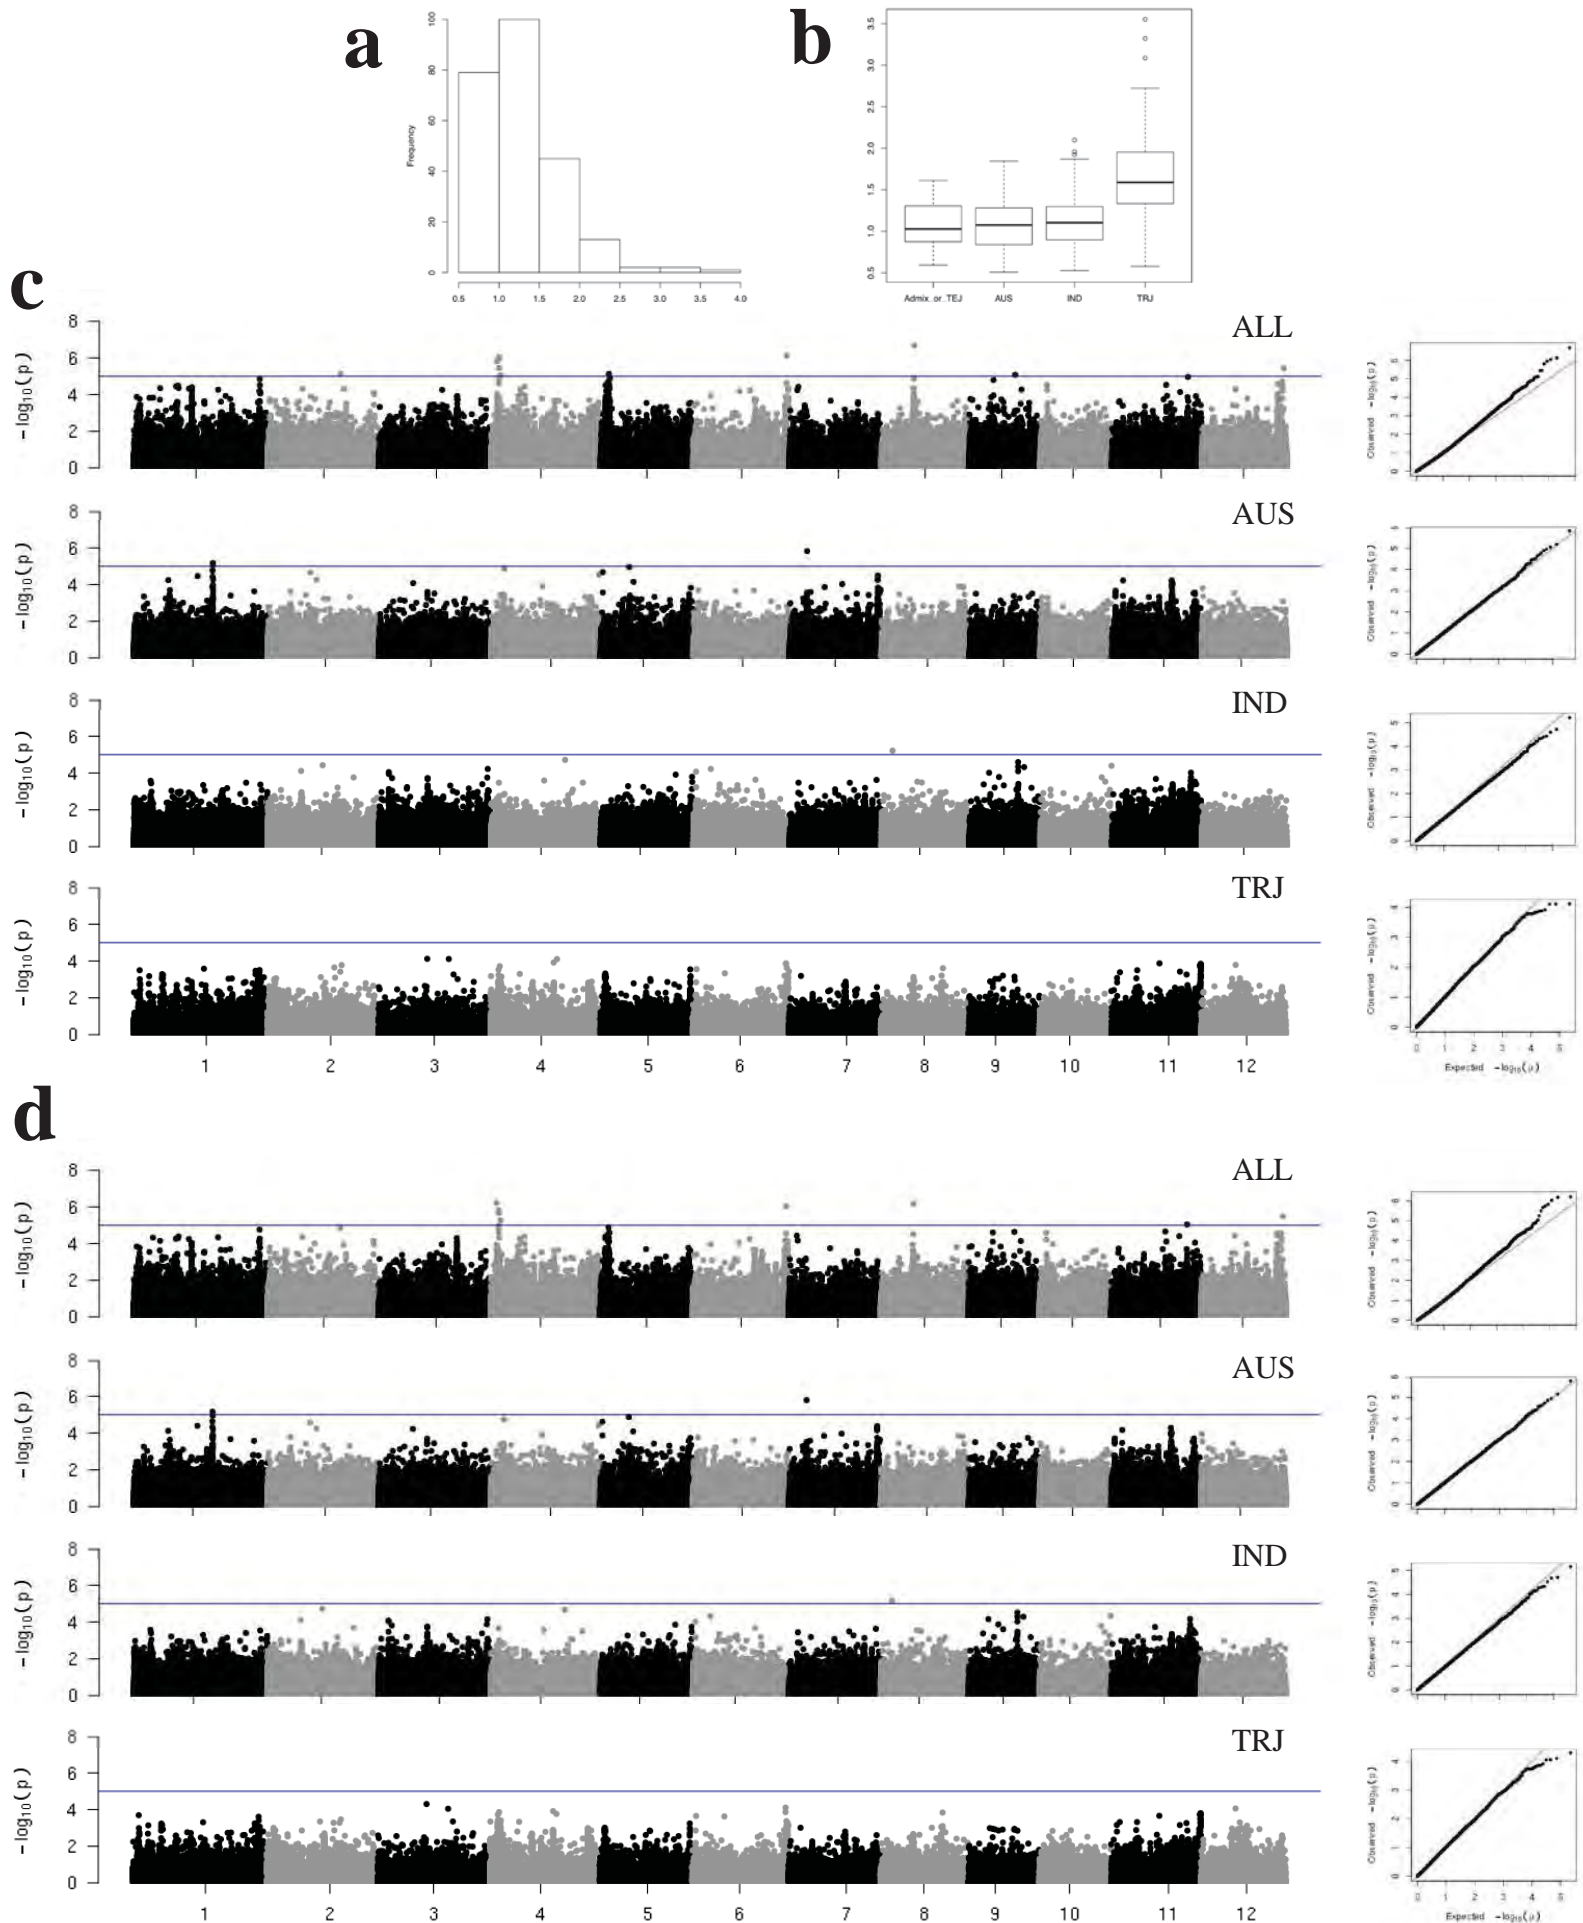

**Supplementary Figure 39. Summary of GWAS results for Primary Branch Number Standard Deviation.** (a, b) Phenotypic distributions. (c) Mixed model controlling for subpopulation structure across all varieties (ALL) and within individual subpopulations (AUS = *aus*, IND = *indica*, TRJ = *tropical japonica*). (d) Mixed model with heading date as a covariate.

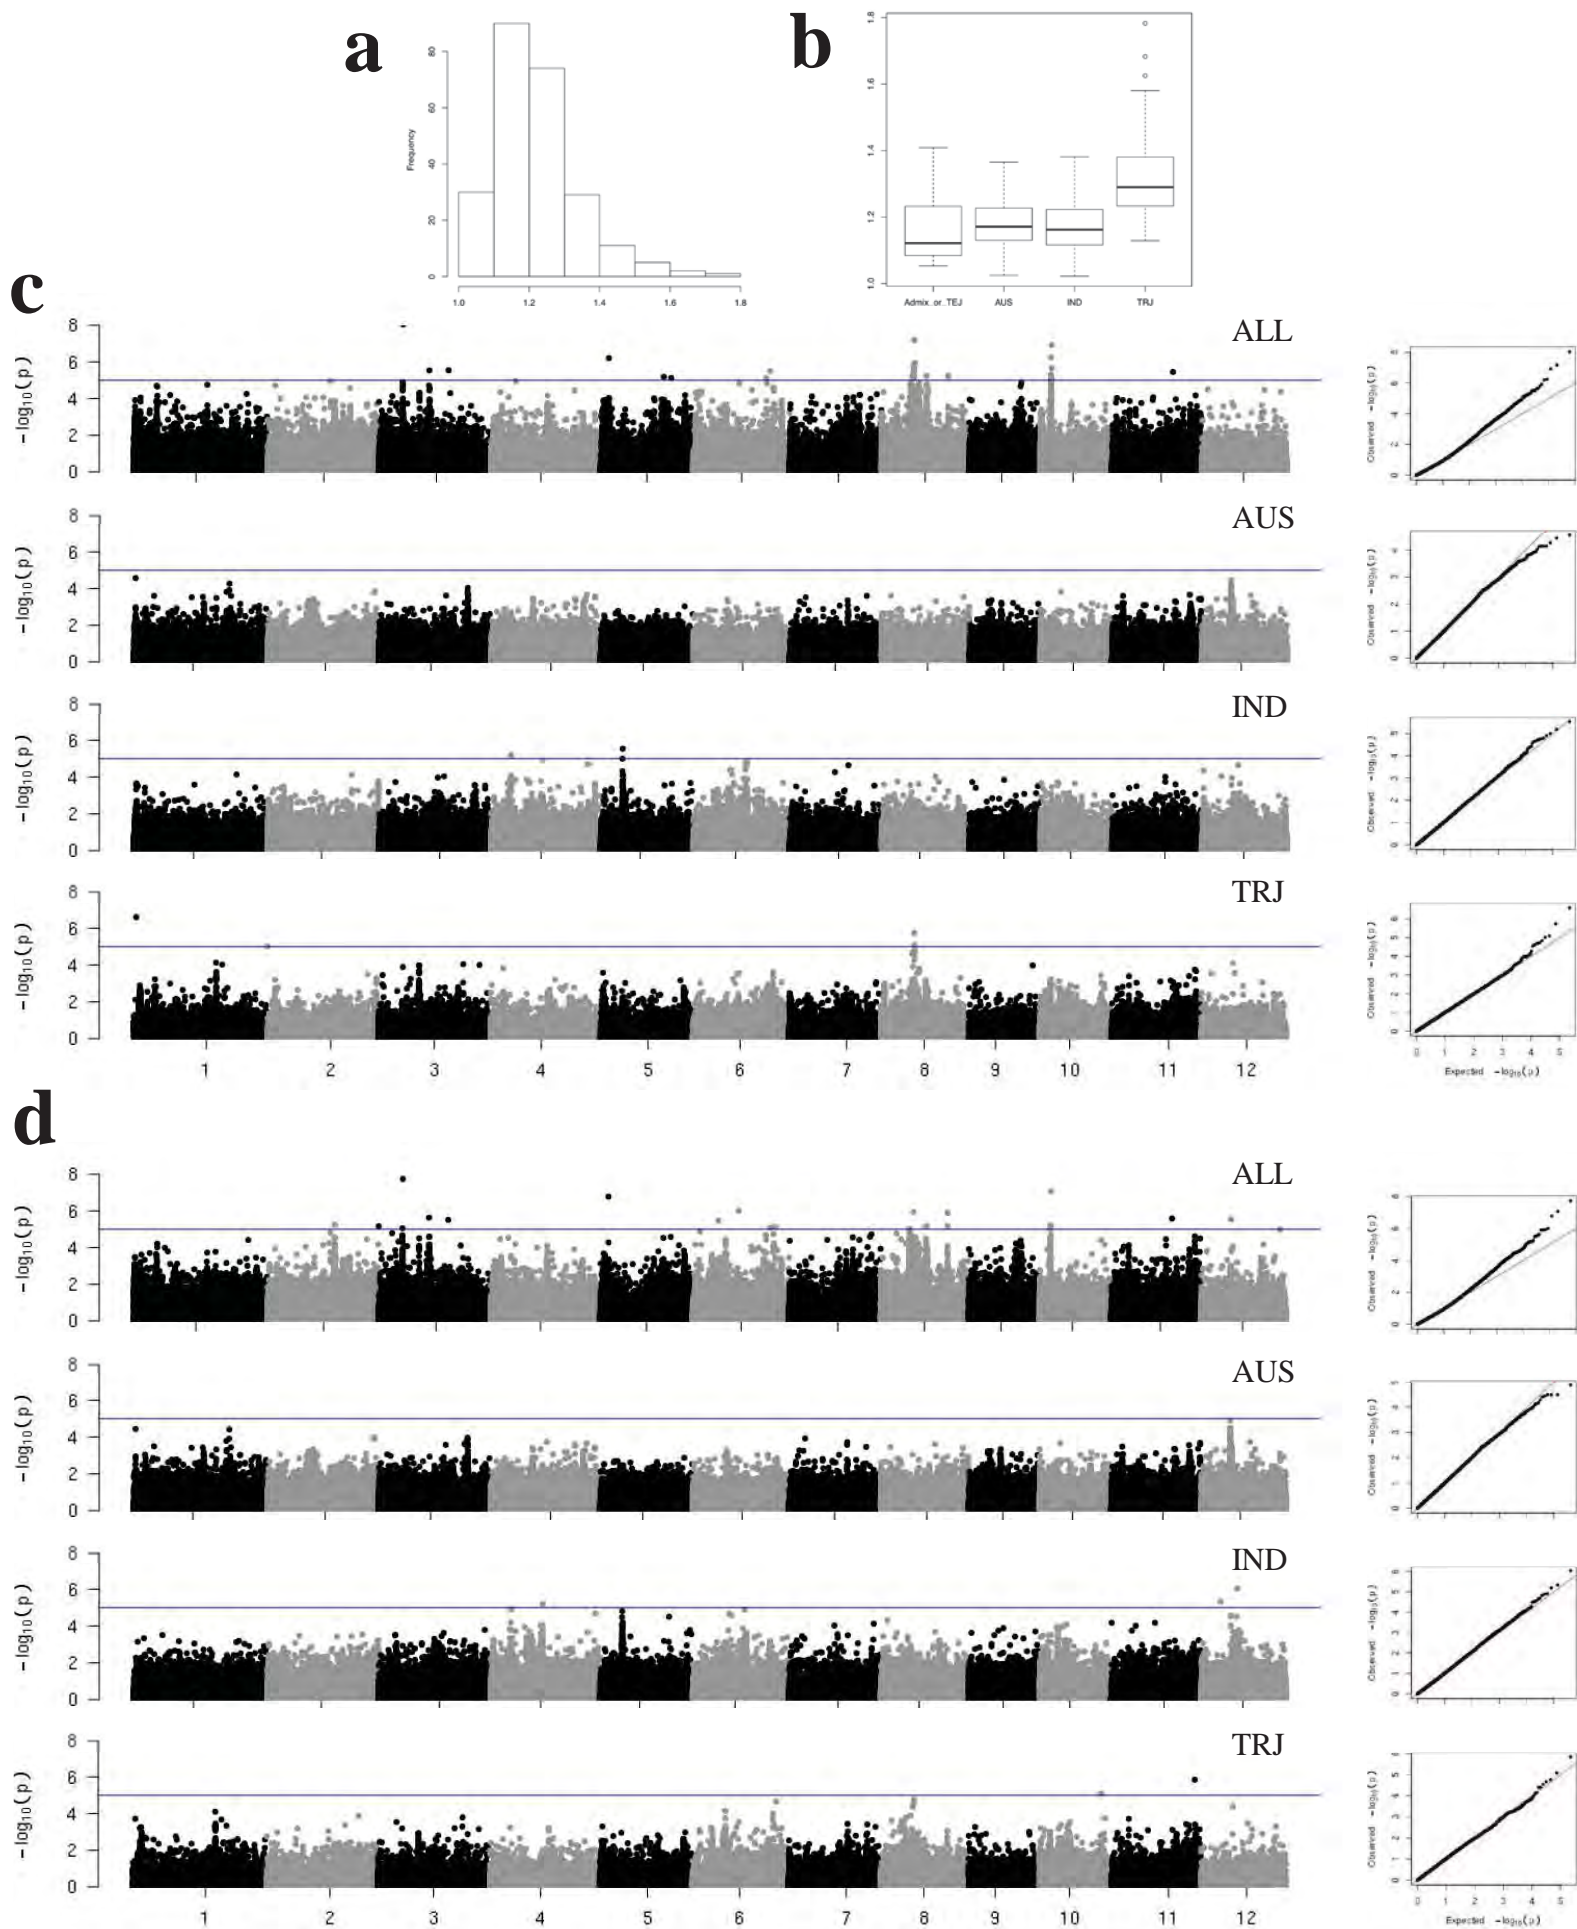

**Supplementary Figure 40. Summary of GWAS results for Number of Primary Branches per Internode.** (a, b) Phenotypic distributions. (c) Mixed model controlling for subpopulation structure across all varieties (ALL) and within individual subpopulations (AUS = *aus*, IND = *indica*, TRJ = *tropical japonica*). (d) Mixed model with heading date as a covariate.



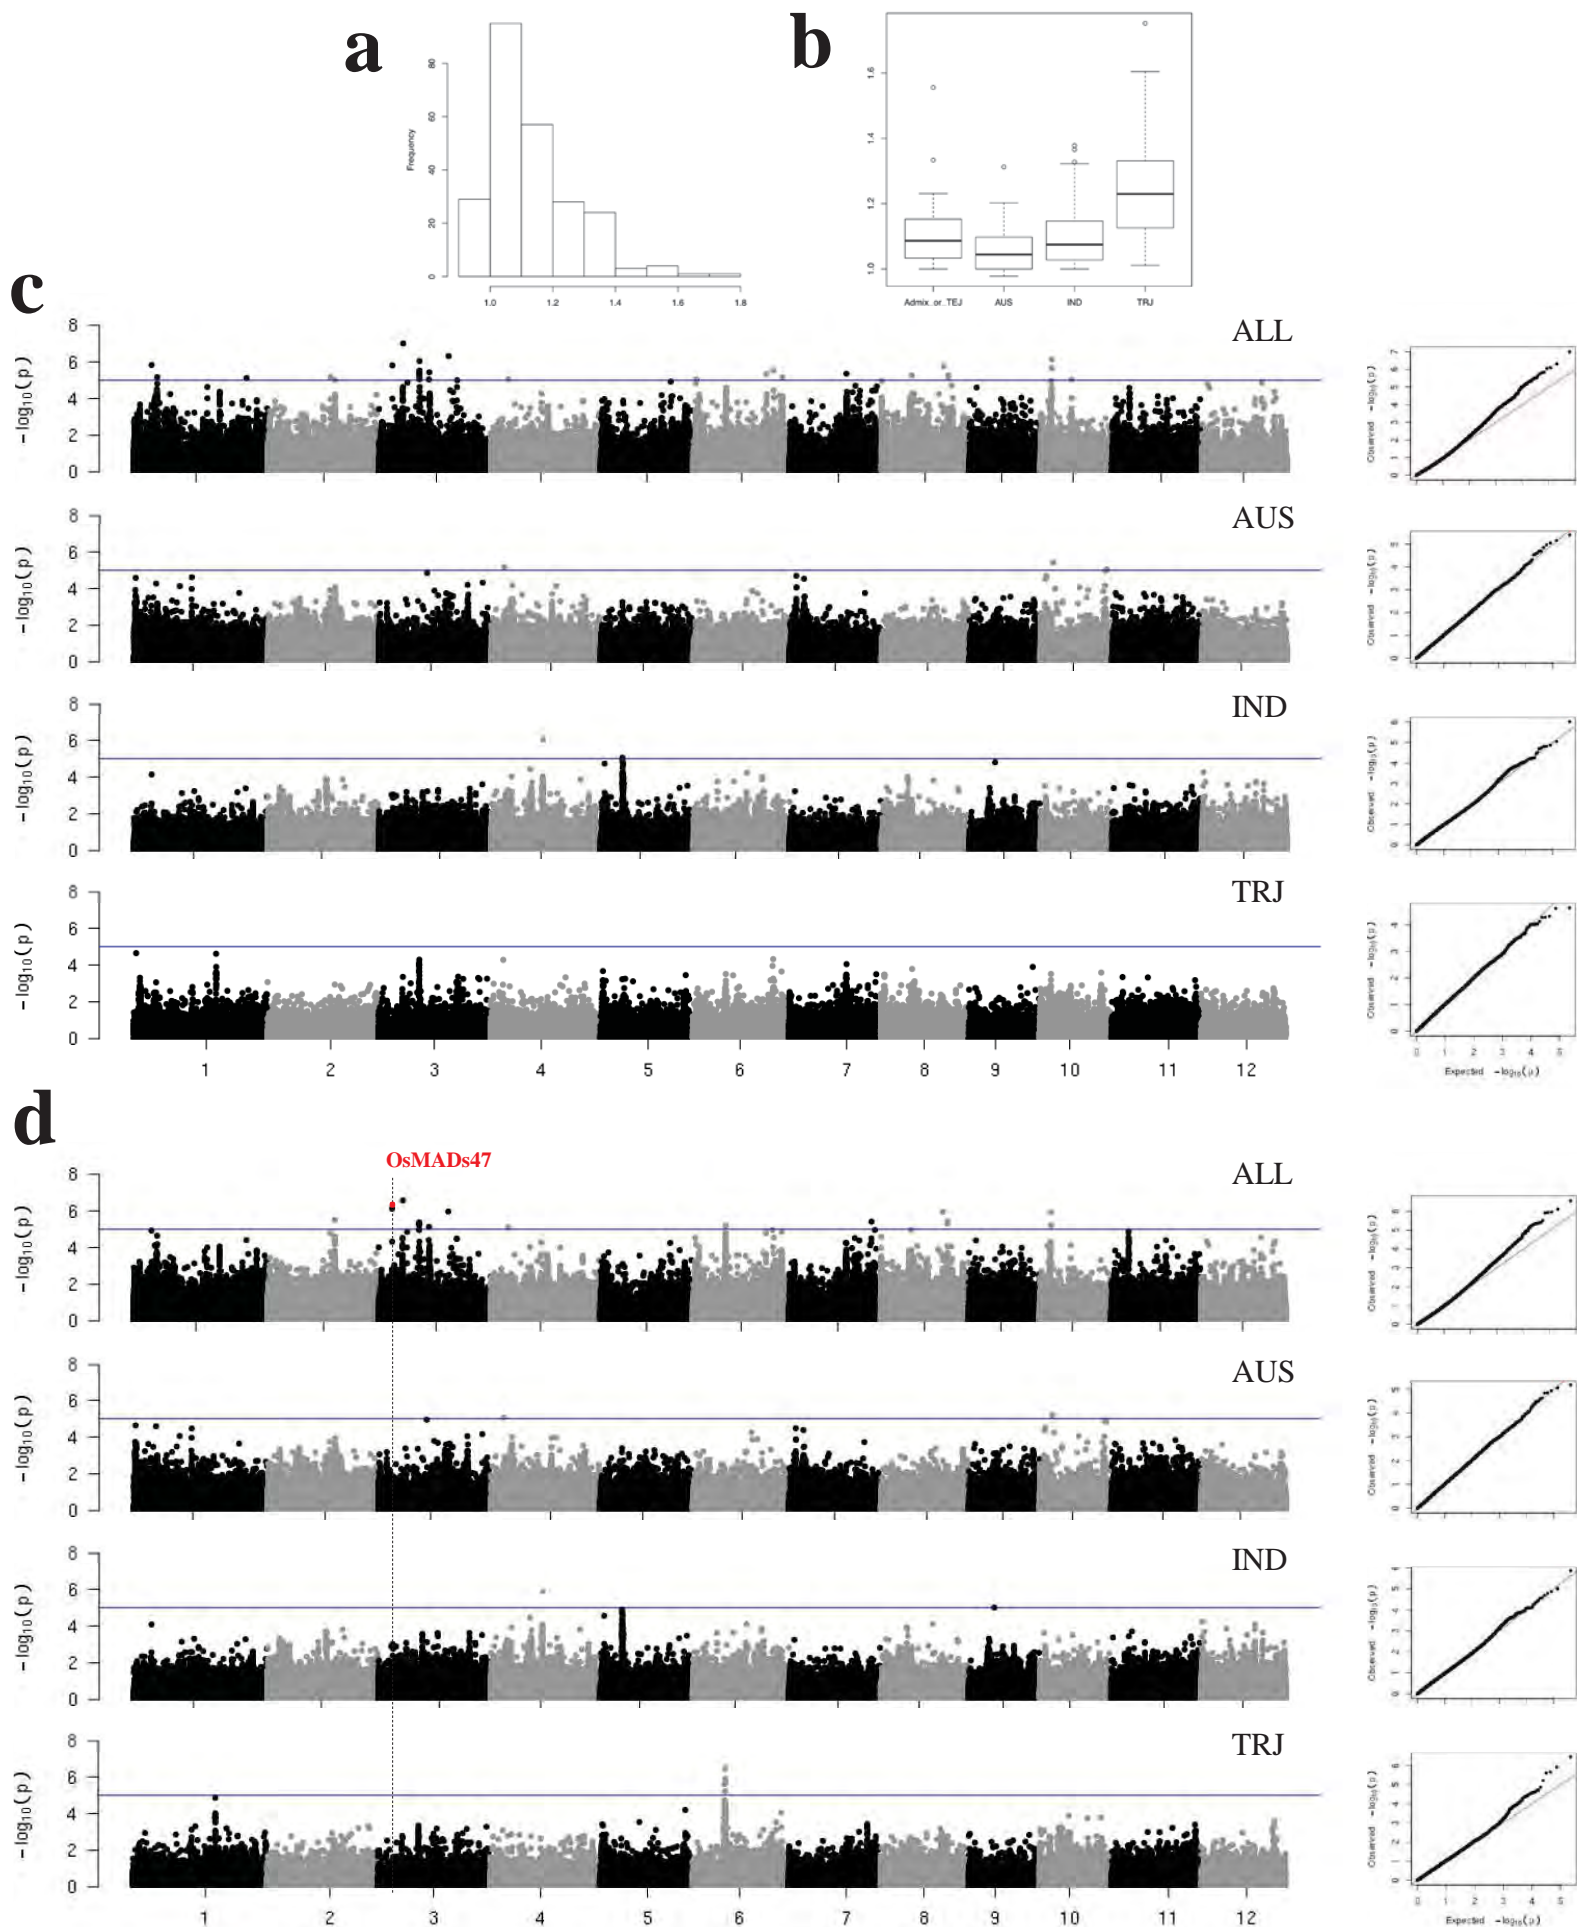

**Supplementary Figure 41. Summary of GWAS results for Number of Primary Branches per Internode in the Upper Half of the Panicle.** (a, b) Phenotypic distributions. (c) Mixed model controlling for subpopulation structure across all varieties (ALL) and within individual subpopulations (AUS = *aus*, IND = *indica*, TRJ = *tropical japonica*). (d) Mixed model with heading date as a covariate.



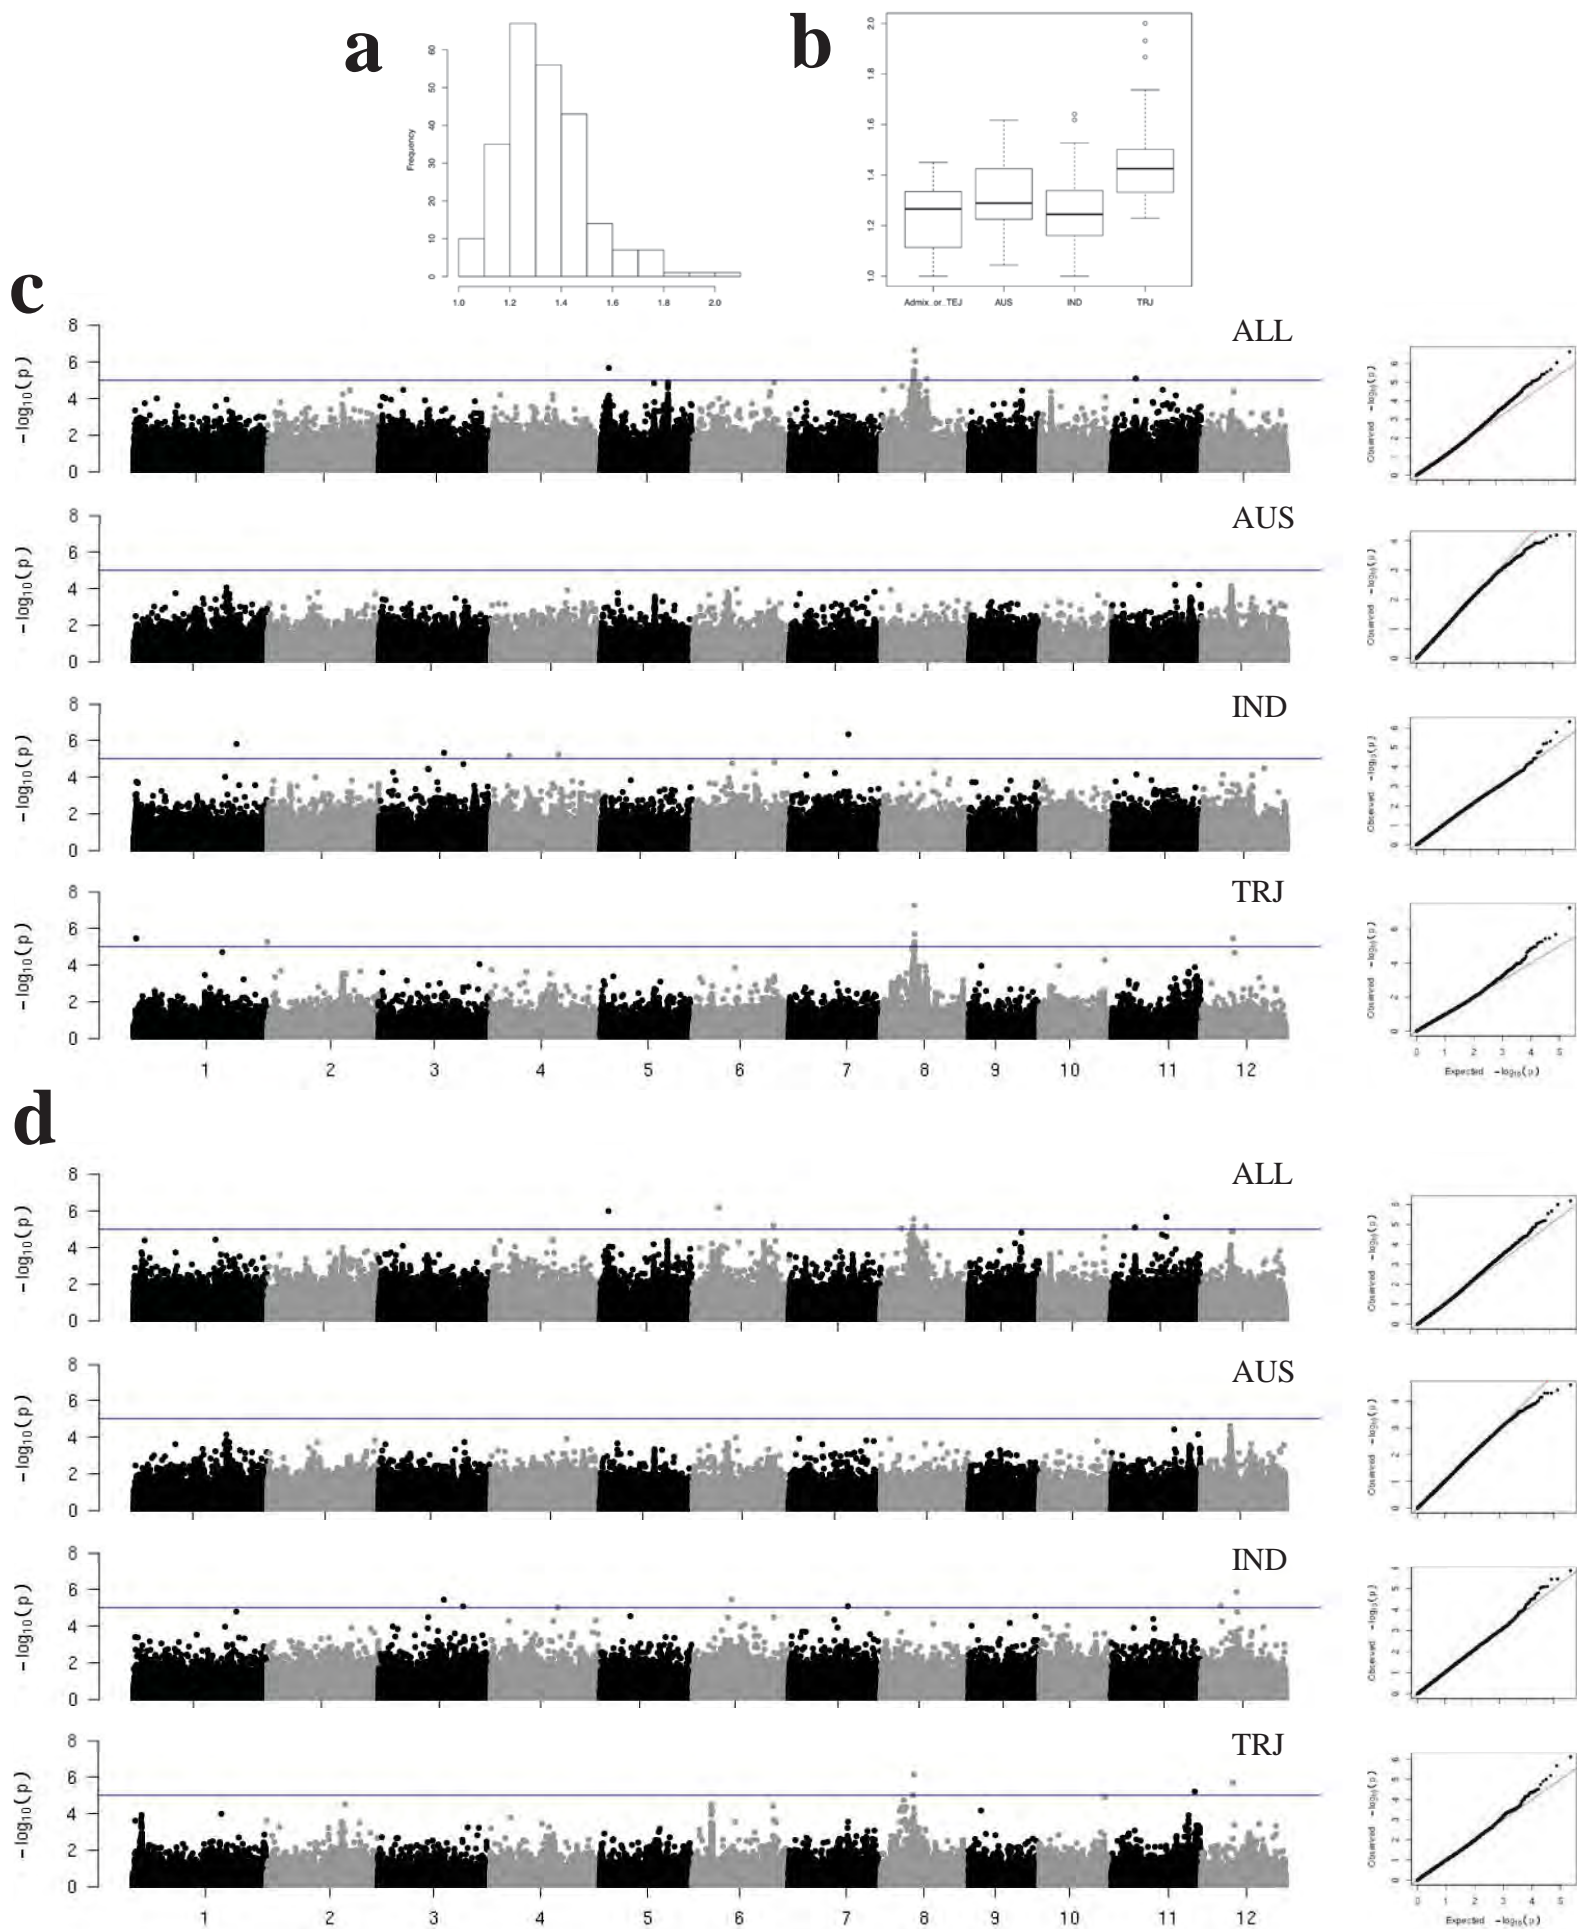

**Supplementary Figure 42. Summary of GWAS results for Number of Primary Branches per Internode in the Lower Half of the Panicle.** (a, b) Phenotypic distributions. (c) Mixed model controlling for subpopulation structure across all varieties (ALL) and within individual subpopulations (AUS = *aus*, IND = *indica*, TRJ = *tropical japonica*). (d) Mixed model with heading date as a covariate.

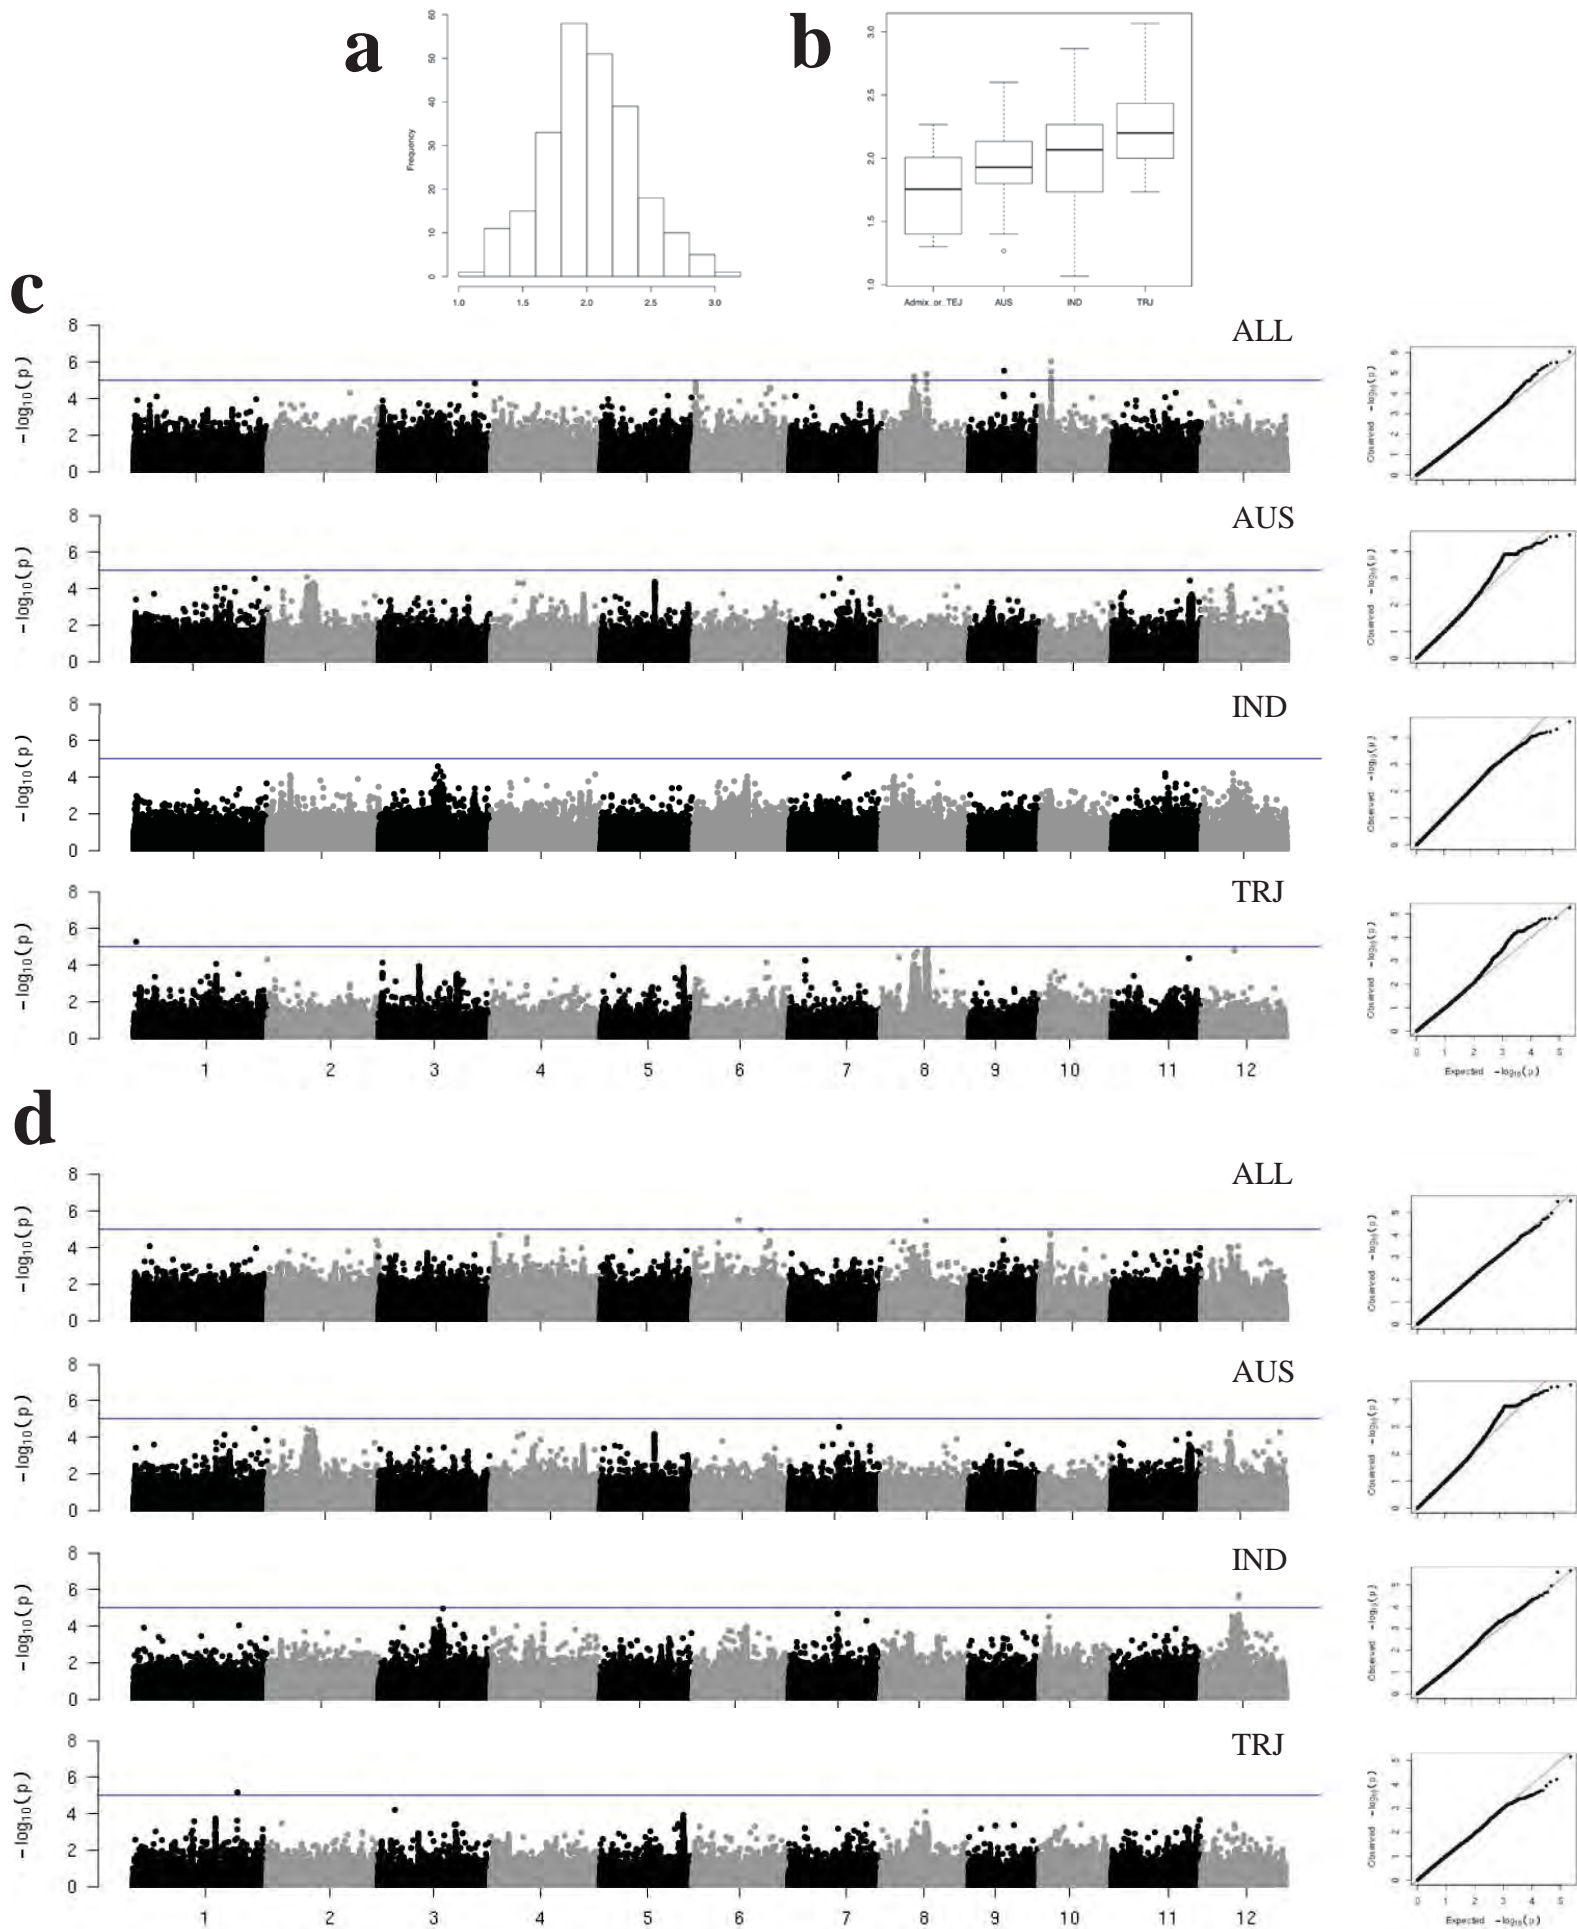

**Supplementary Figure 43. Summary of GWAS results for Maximum Number of Primary Branches per Internode. (a, b)** Phenotypic distributions. **(c)** Mixed model controlling for subpopulation structure across all varieties (ALL) and within individual subpopulations (AUS = *aus*, IND = *indica*, TRJ = *tropical japonica*). **(d)** Mixed model with heading date as a covariate.



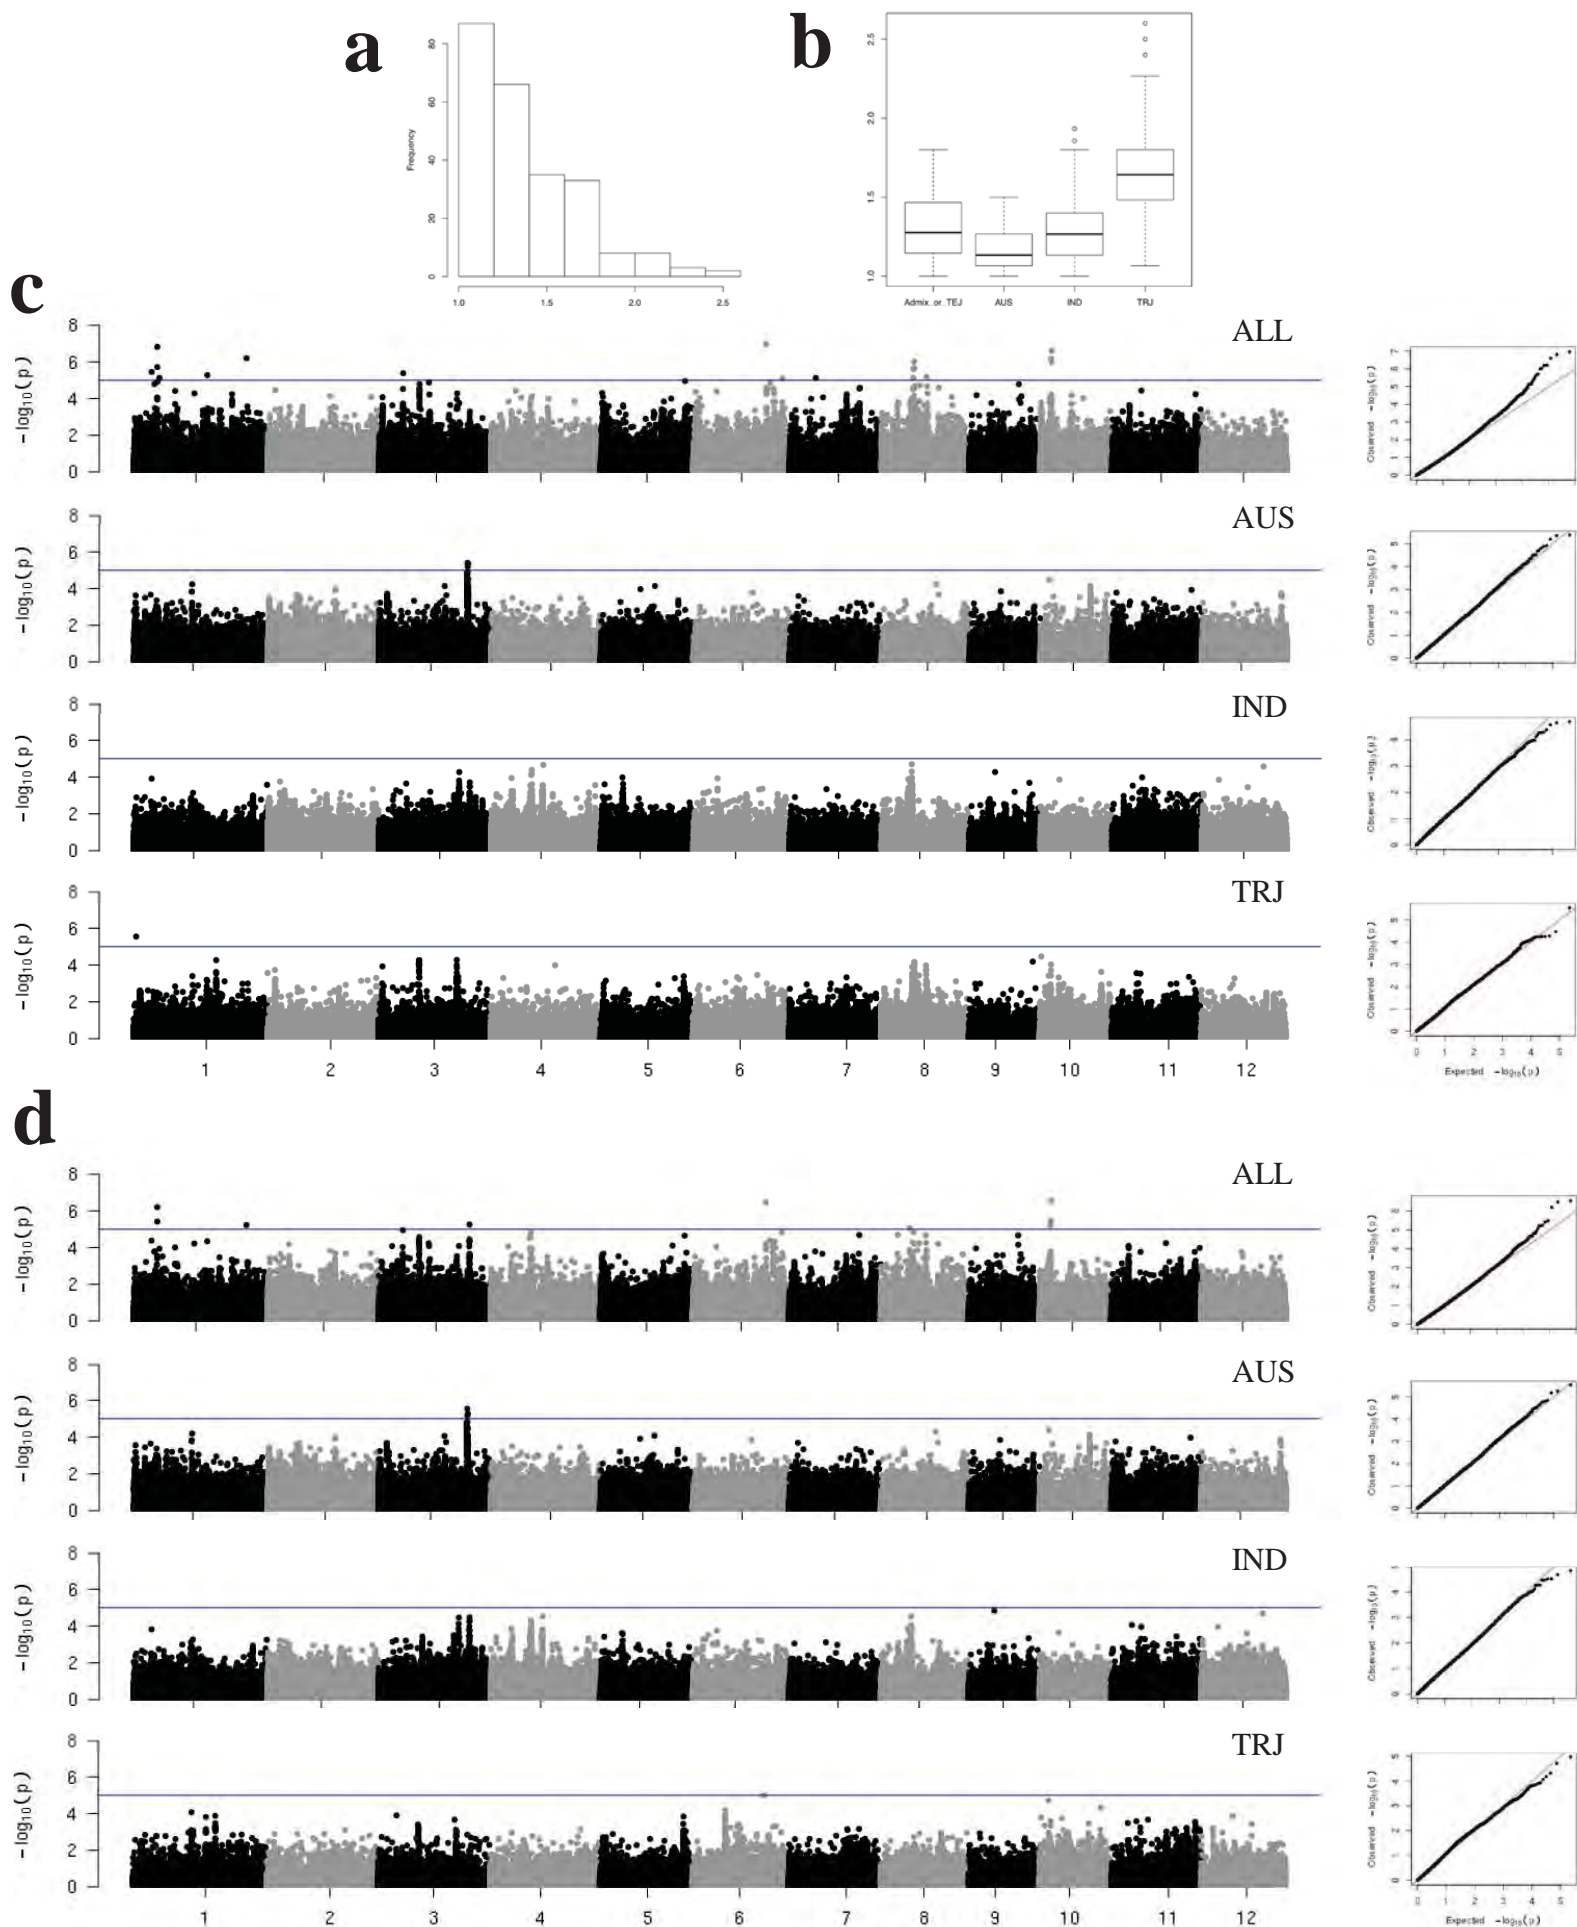

**Supplementary Figure 44. Summary of GWAS results for Maximum Number of Primary Branches per Internode in the Upper Half of the Panicle.** (a, b) Phenotypic distributions. (c) Mixed model controlling for subpopulation structure across all varieties (ALL) and within individual subpopulations (AUS = *aus*, IND = *indica*, TRJ = *tropical japonica*). (d) Mixed model with heading date as a covariate.



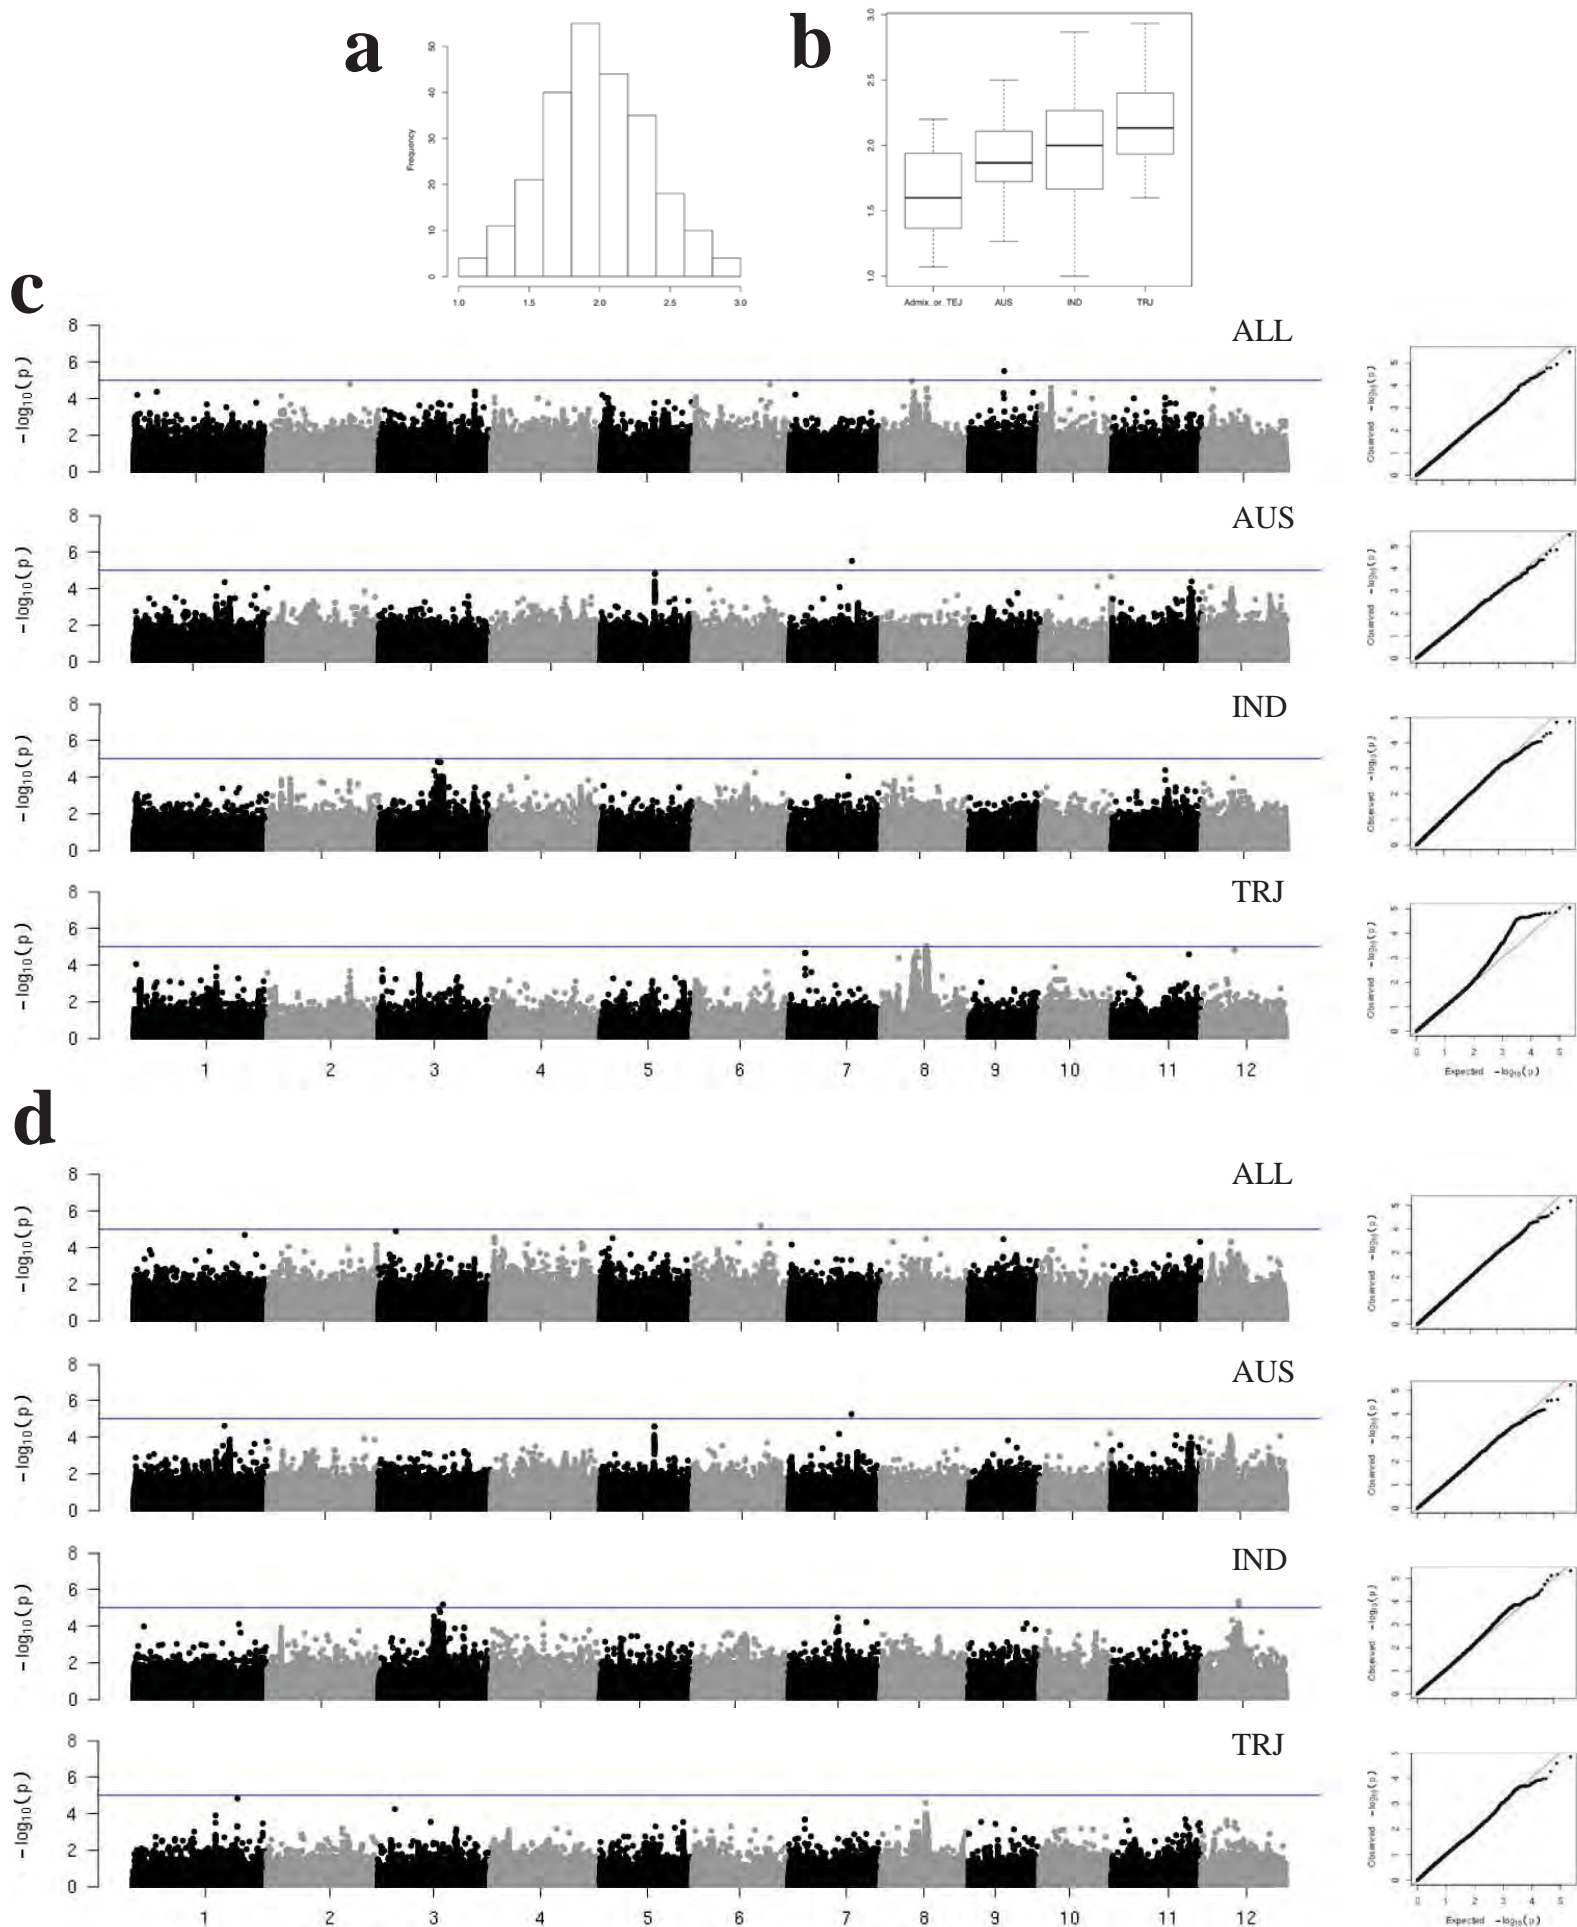

**Supplementary Figure 45. Summary of GWAS results for Maximum Number of Primary Branches per Internode in the Lower Half of the Panicle. (a, b) Phenotypic distributions. (c) Mixed model controlling for subpopulation structure across all varieties (ALL) and within individual subpopulations (AUS = *aus*, IND = *indica*, TRJ = *tropical japonica*). (d) Mixed model with heading date as a covariate.**

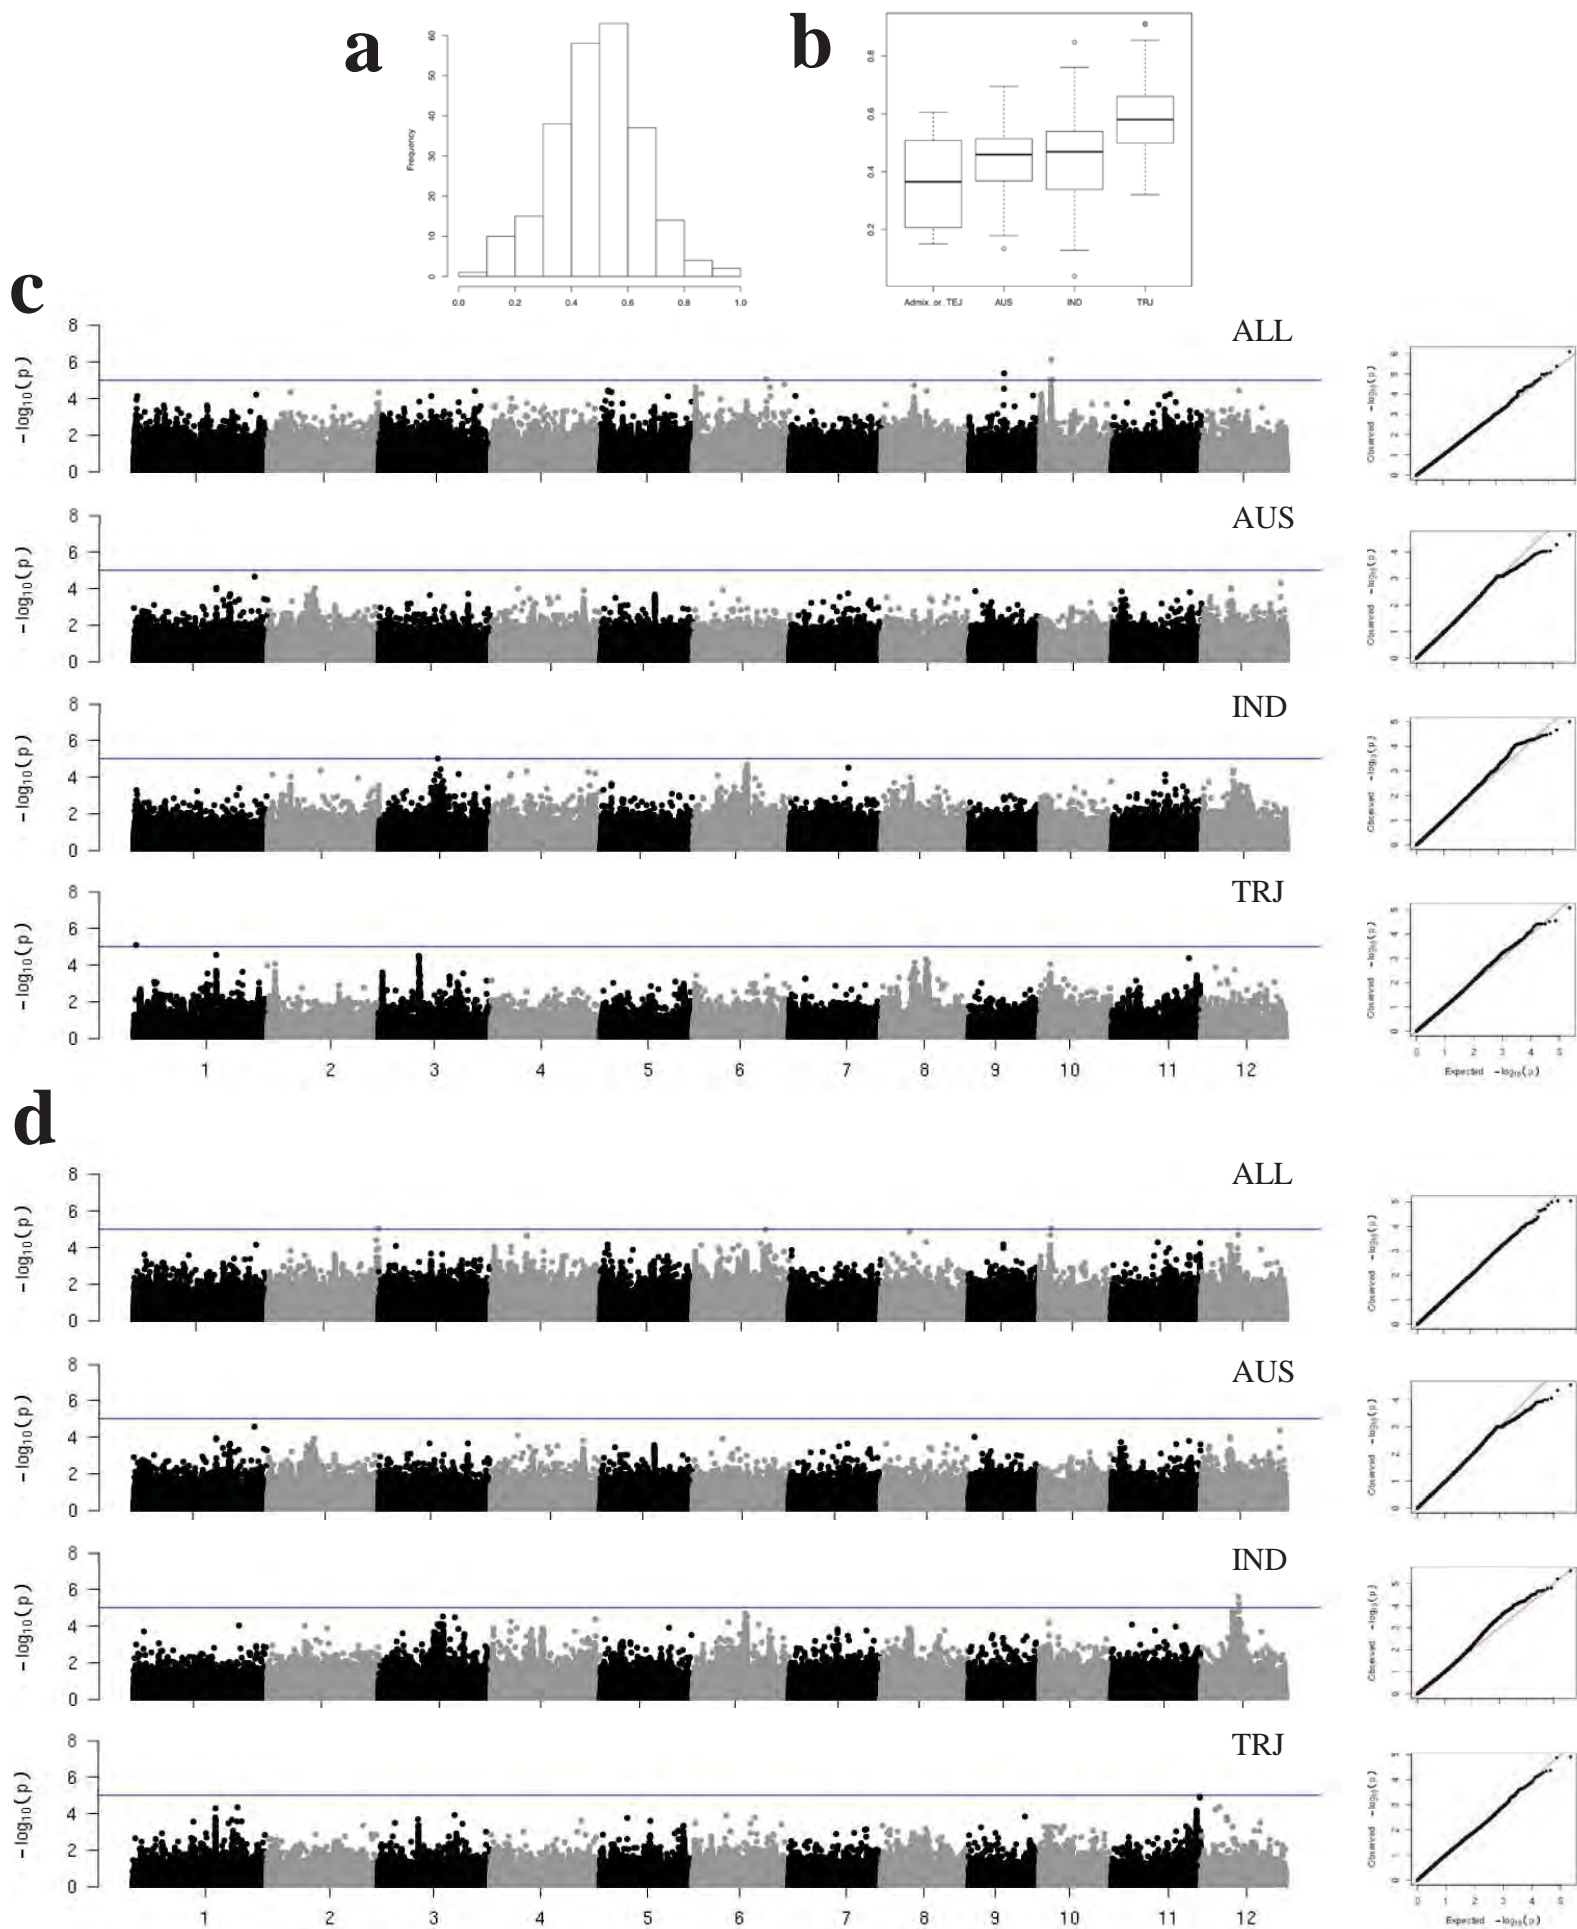

**Supplementary Figure 46. Summary of GWAS results for Number of Primary Branches per Internode Standard Deviation. (a, b) Phenotypic distributions. (c) Mixed model controlling for subpopulation structure across all varieties (ALL) and within individual subpopulations (AUS = *aus*, IND = *indica*, TRJ = *tropical japonica*). (d) Mixed model with heading date as a covariate.**



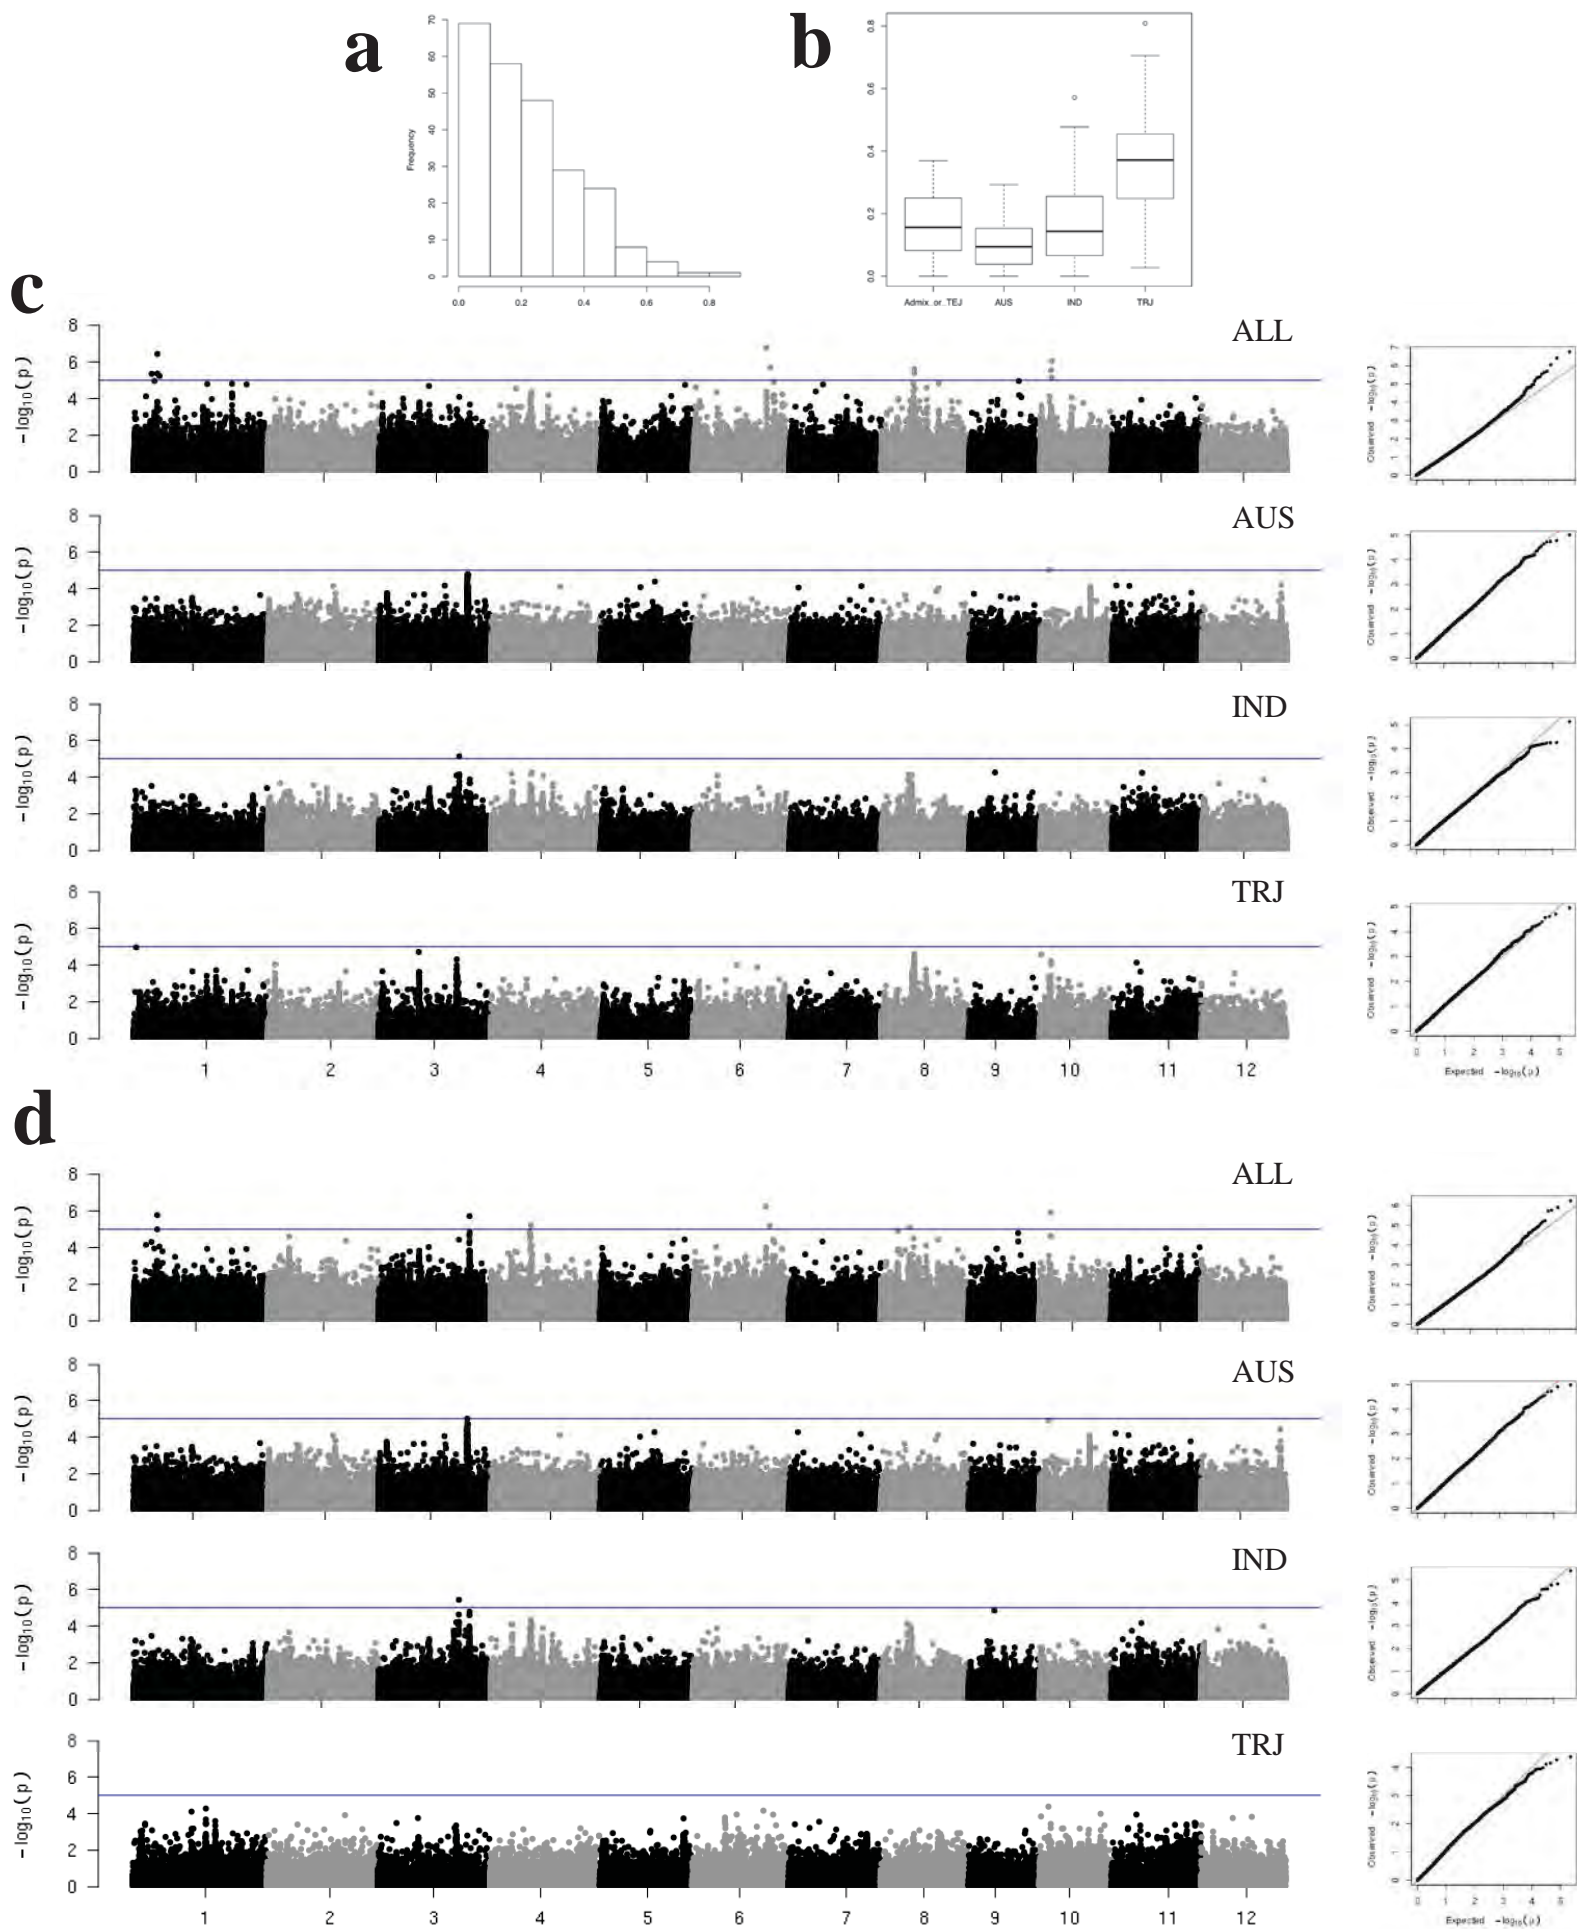

**Supplementary Figure 47. Summary of GWAS results for Number of Primary Branches per Internode in the Upper Half of the Panicle Standard Deviation. (a, b) Phenotypic distributions. (c) Mixed model controlling for subpopulation structure across all varieties (ALL) and within individual subpopulations (AUS = *aus*, IND = *indica*, TRJ = *tropical japonica*). (d) Mixed model with heading date as a covariate.**



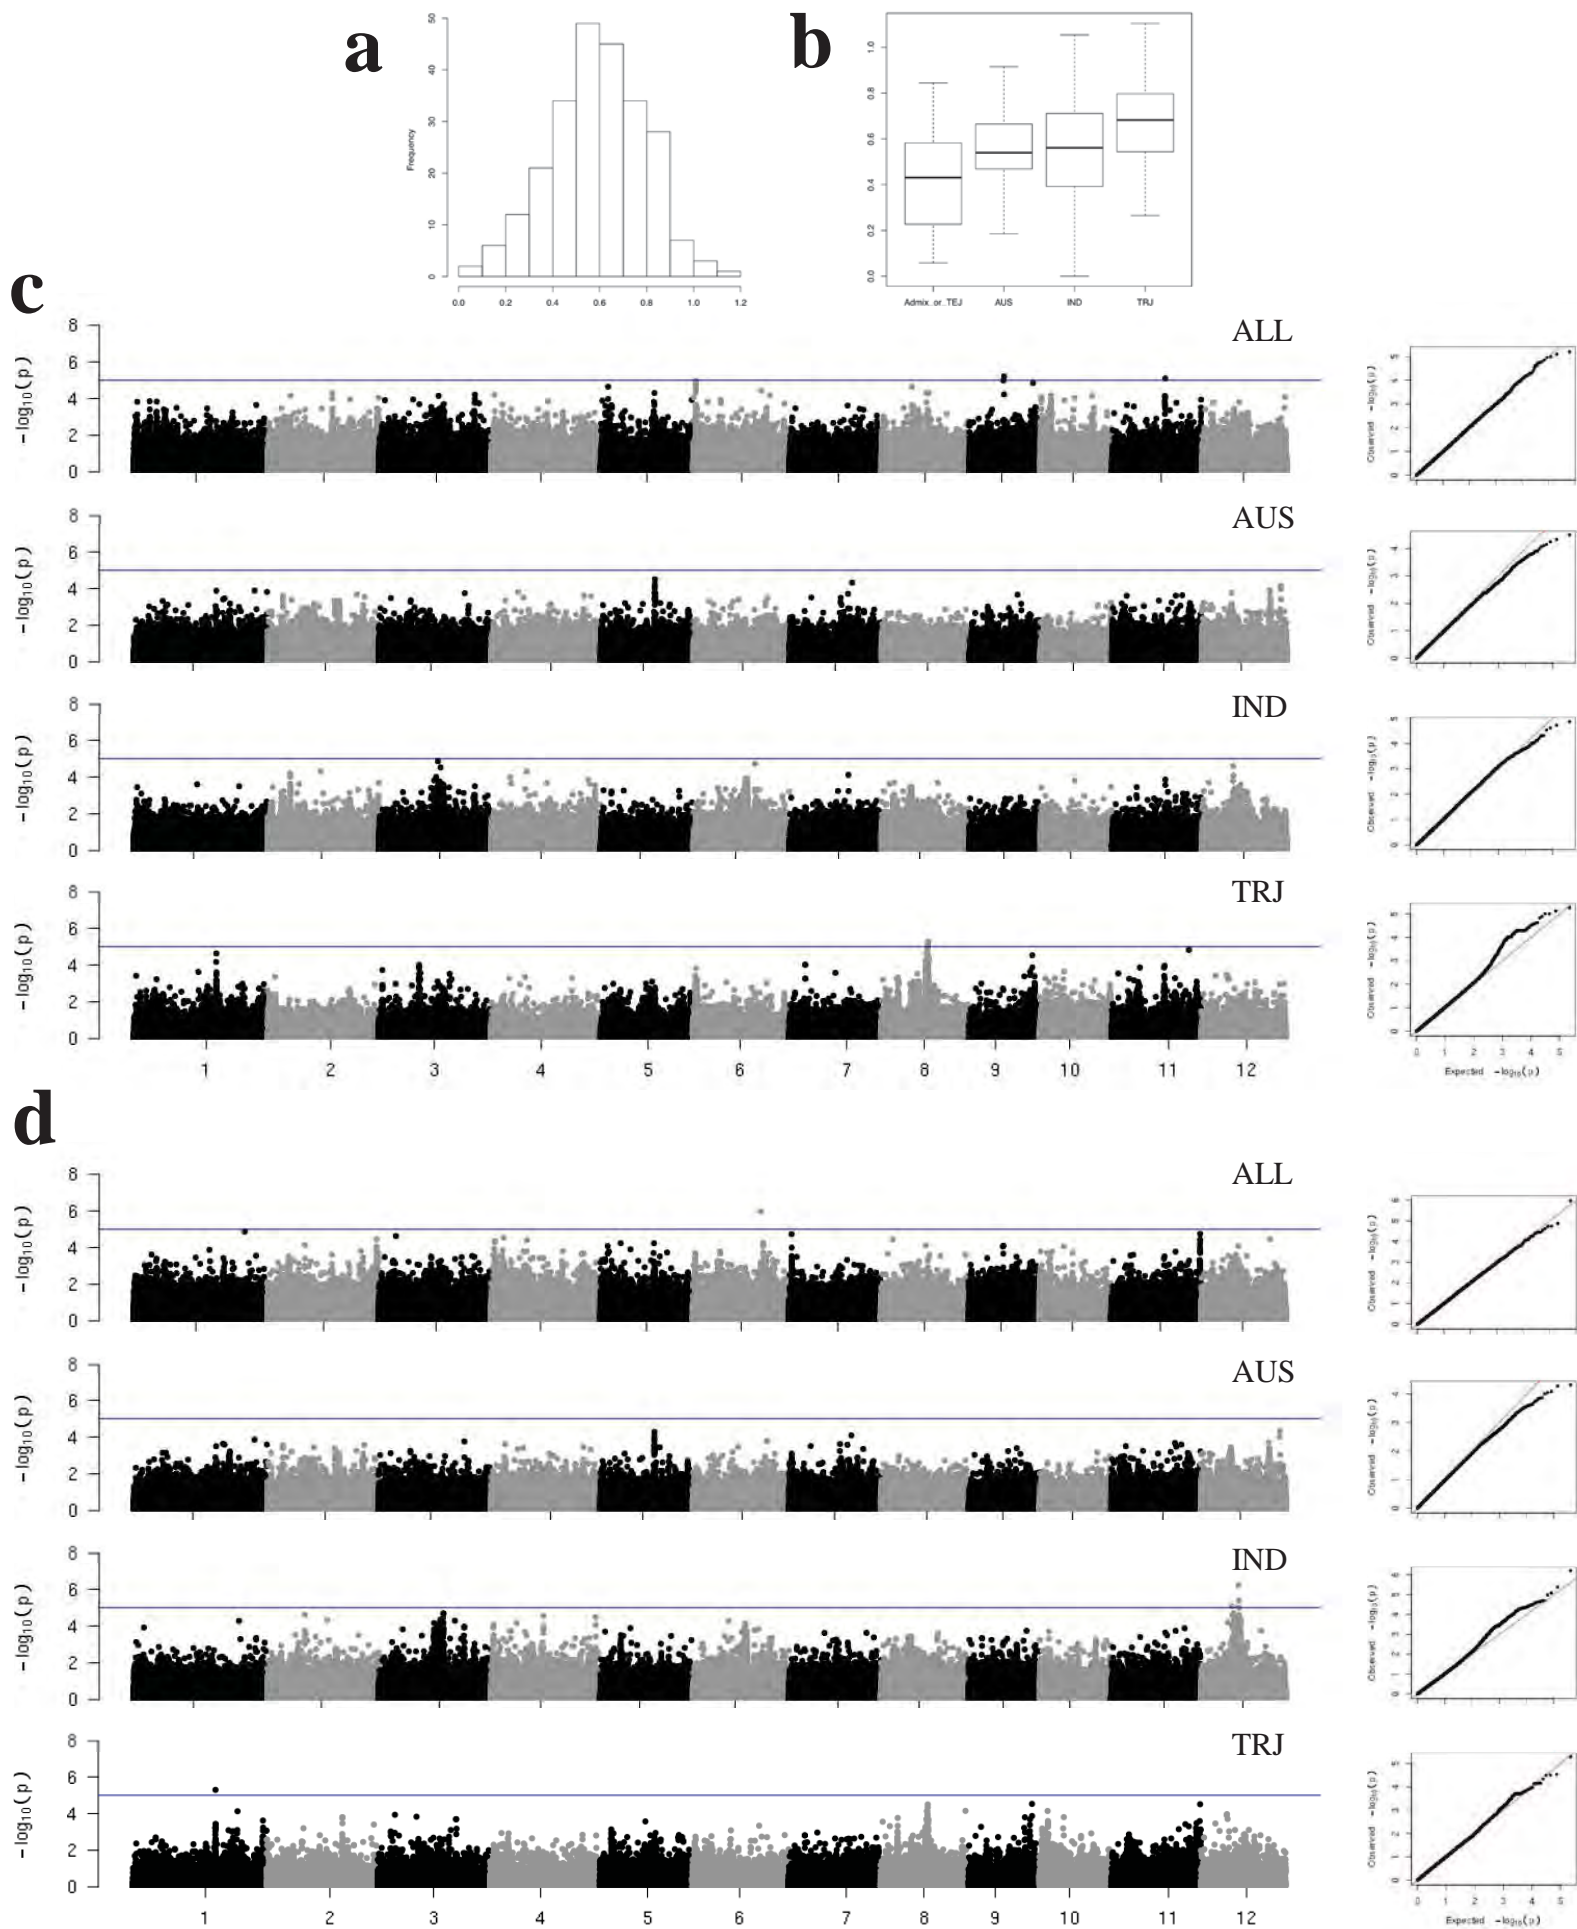

**Supplementary Figure 48. Summary of GWAS results for Number of Primary Branches per Internode in the Lower Half of the Panicle Standard Deviation. (a, b) Phenotypic distributions. (c) Mixed model controlling for subpopulation structure across all varieties (ALL) and within individual subpopulations (AUS = *aus*, IND = *indica*, TRJ = *tropical japonica*). (d) Mixed model with heading date as a covariate.**

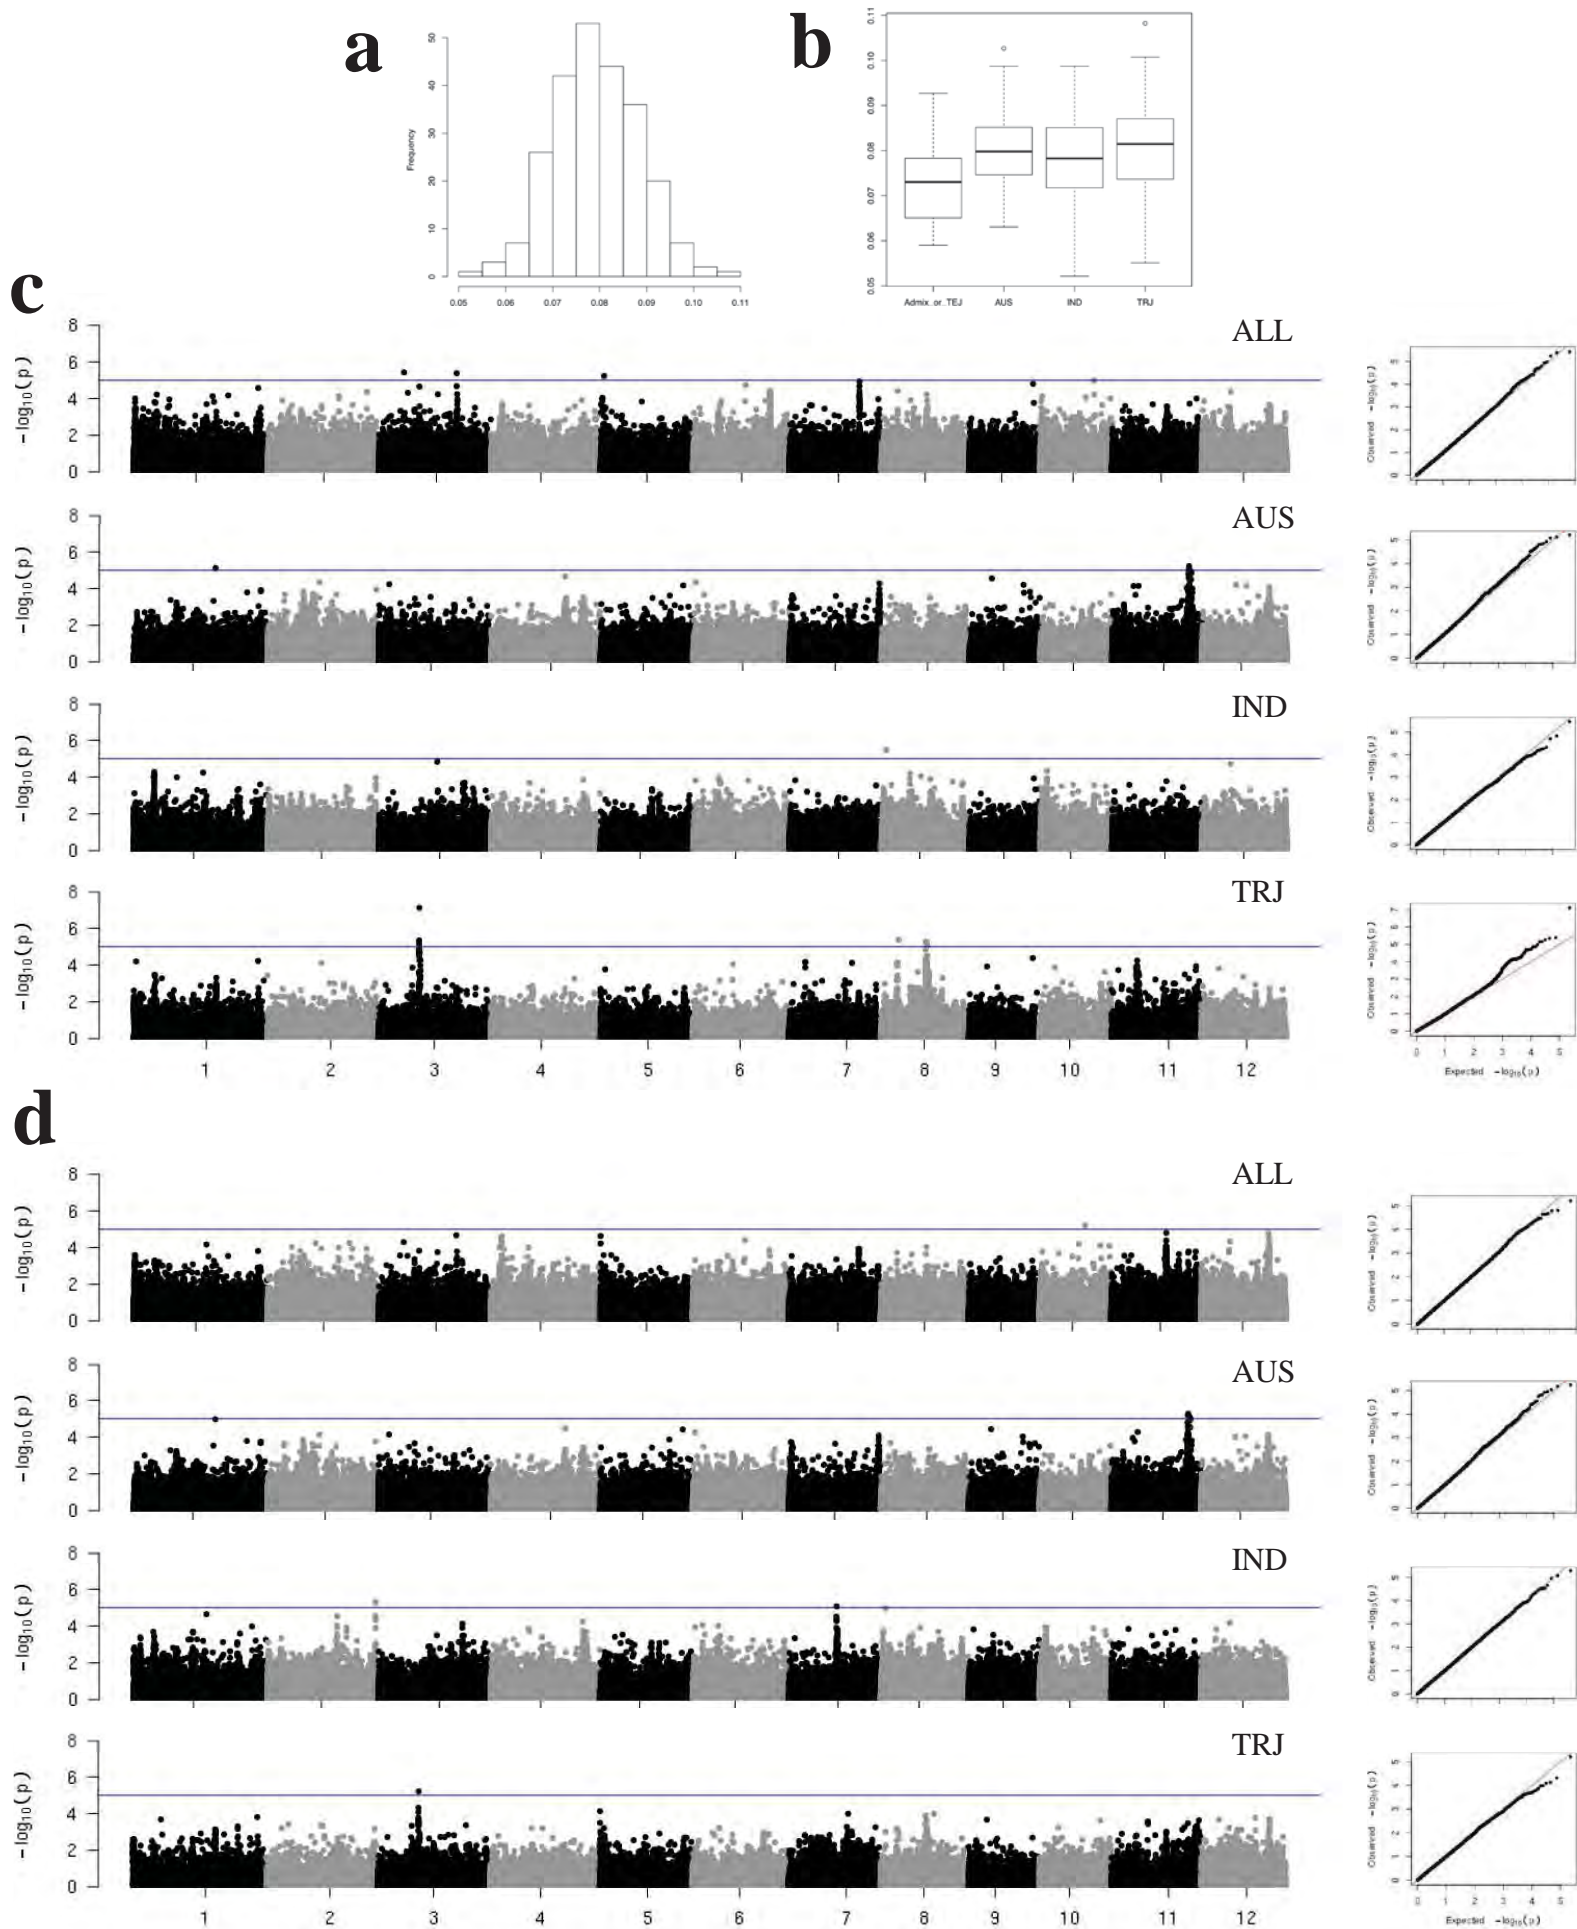

**Supplementary Figure 49. Summary of GWAS results for Thickness of the Rachis (cm).** (a, b) Phenotypic distributions. (c) Mixed model controlling for subpopulation structure across all varieties (ALL) and within individual subpopulations (AUS = *aus*, IND = *indica*, TRJ = *tropical japonica*). (d) Mixed model with heading date as a covariate.



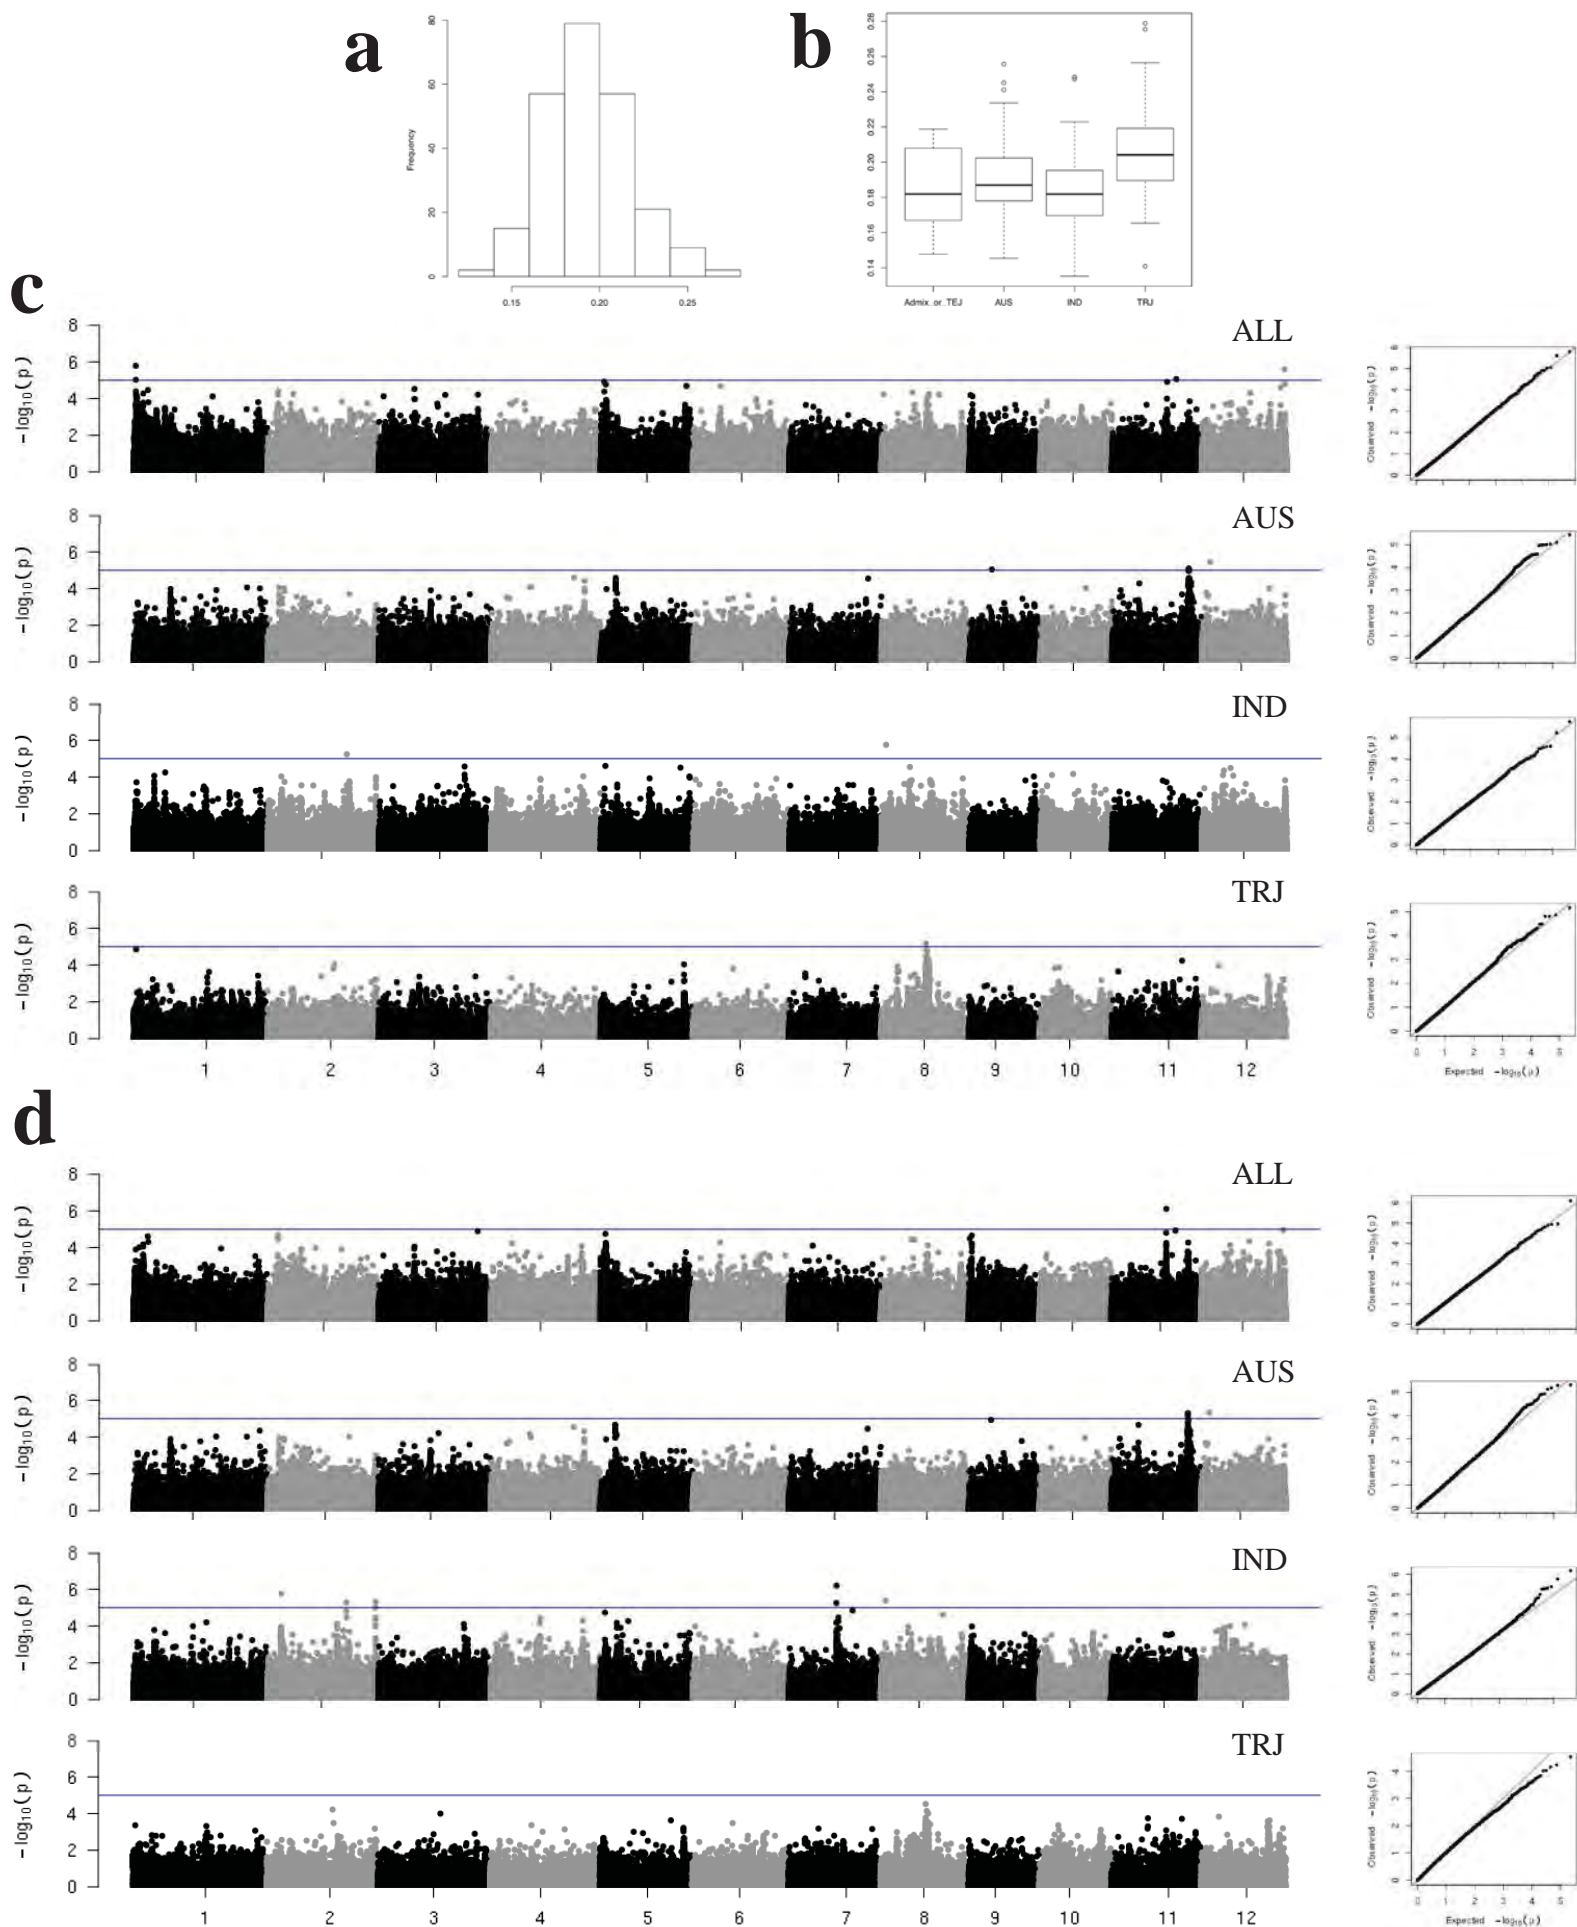

**Supplementary Figure 50. Summary of GWAS results for Maximum Thickness of the Rachis (cm).** (a, b) Phenotypic distributions. (c) Mixed model controlling for subpopulation structure across all varieties (ALL) and within individual subpopulations (AUS = *aus*, IND = *indica*, TRJ = *tropical japonica*). (d) Mixed model with heading date as a covariate.



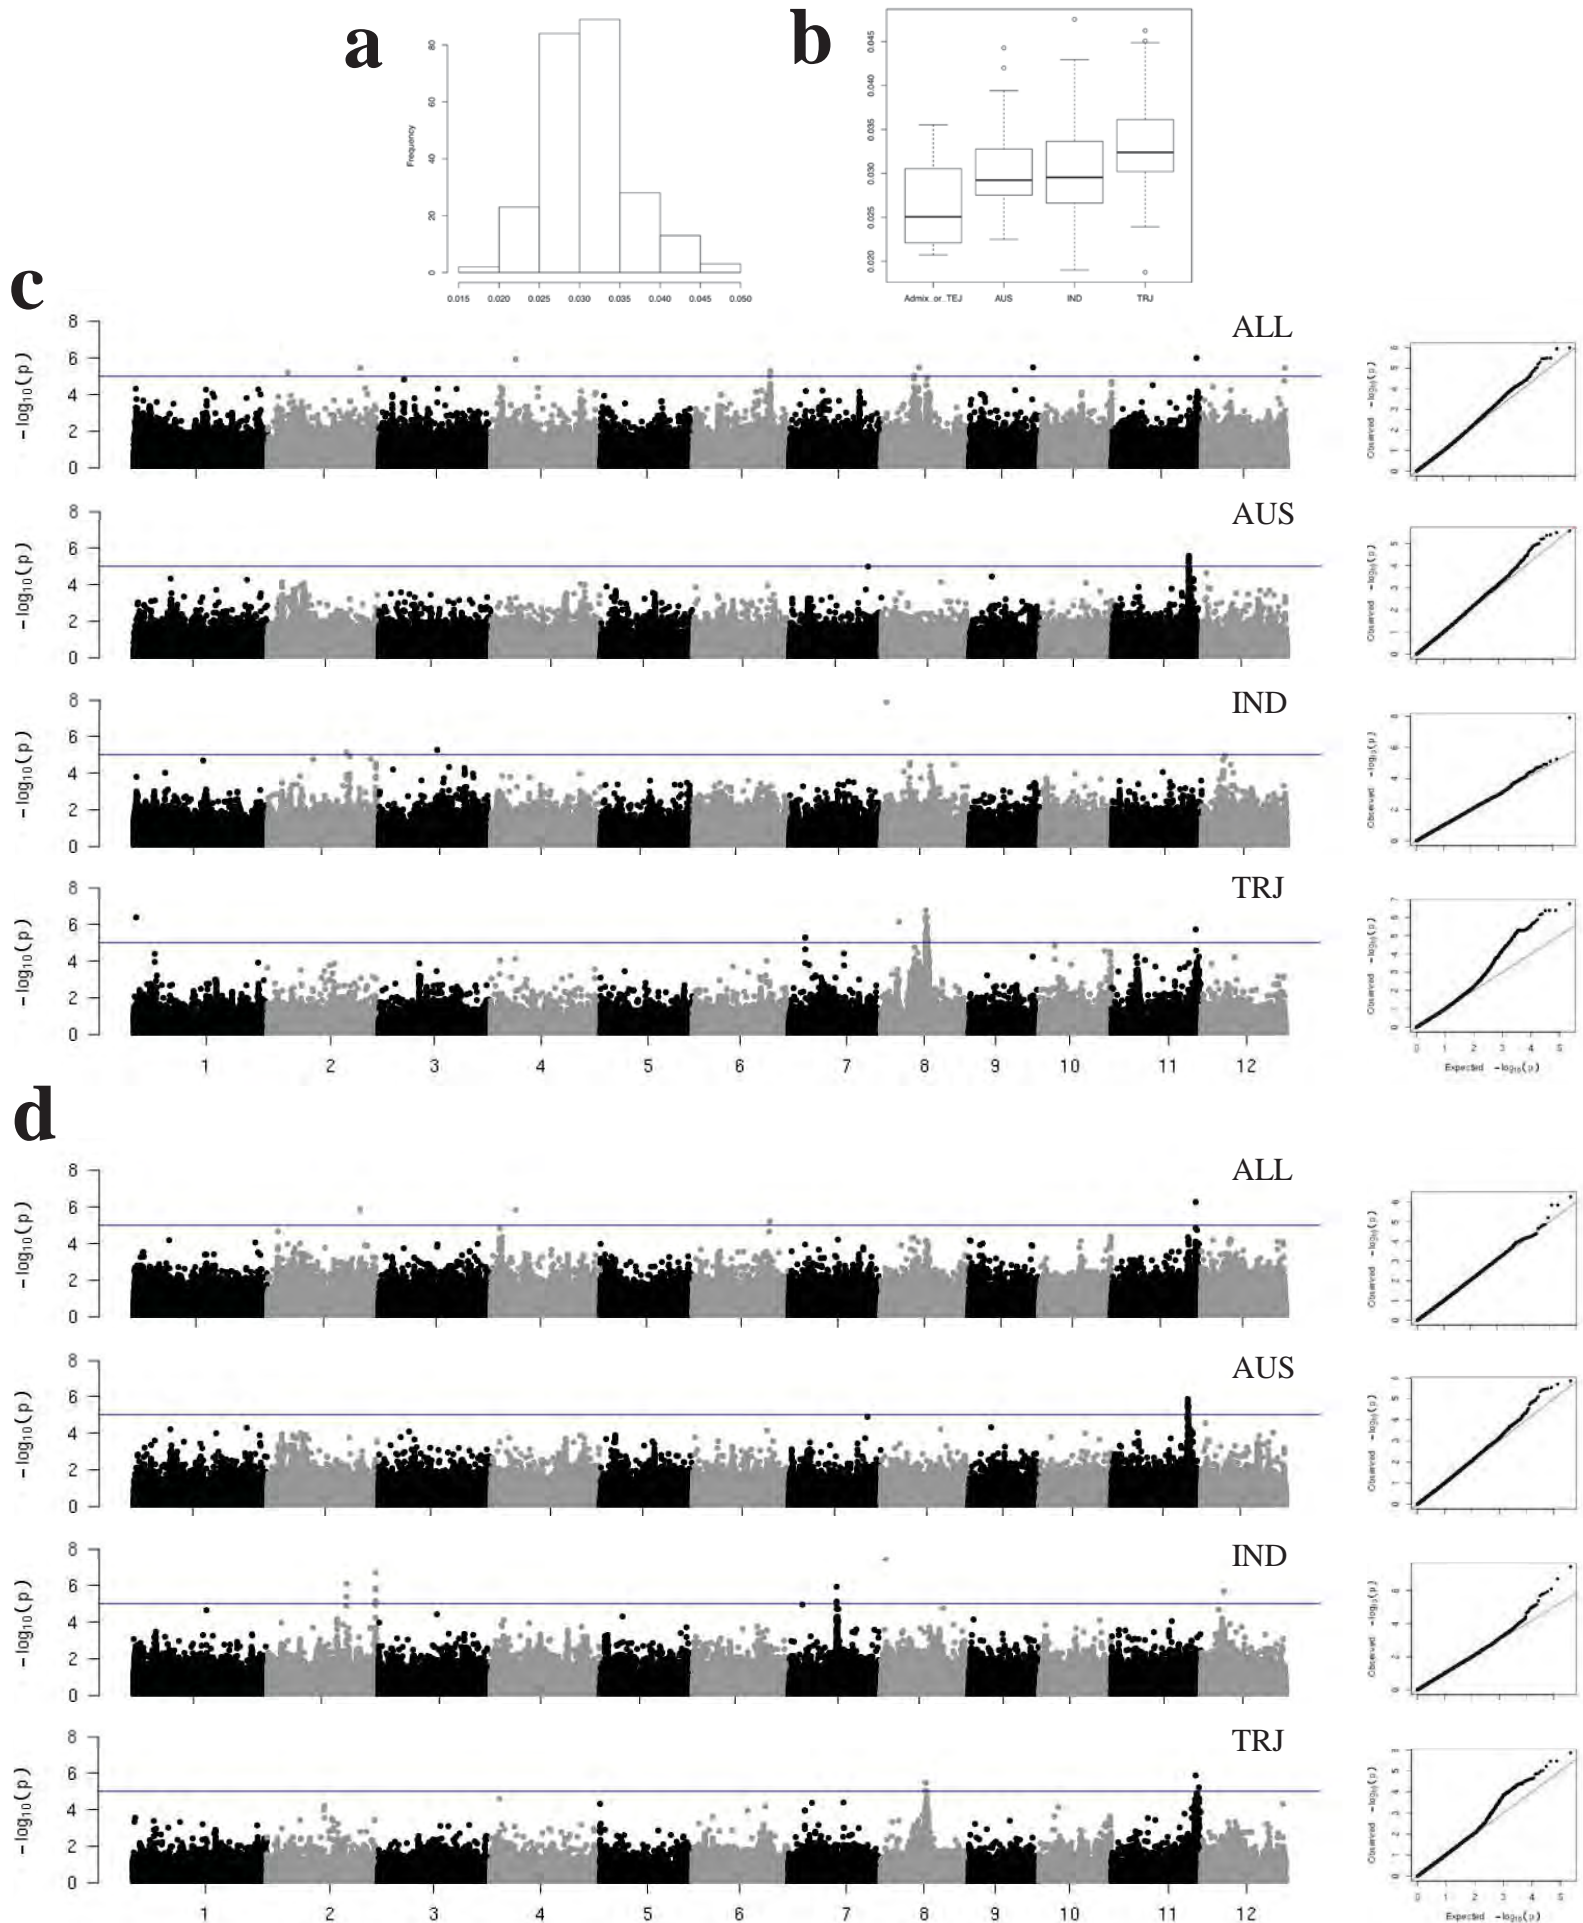

**Supplementary Figure 51. Summary of GWAS results for Thickness of the Rachis Standard Deviation (cm).** (a, b) Phenotypic distributions. (c) Mixed model controlling for subpopulation structure across all varieties (ALL) and within individual subpopulations (AUS = *aus*, IND = *indica*, TRJ = *tropical japonica*). (d) Mixed model with heading date as a covariate.

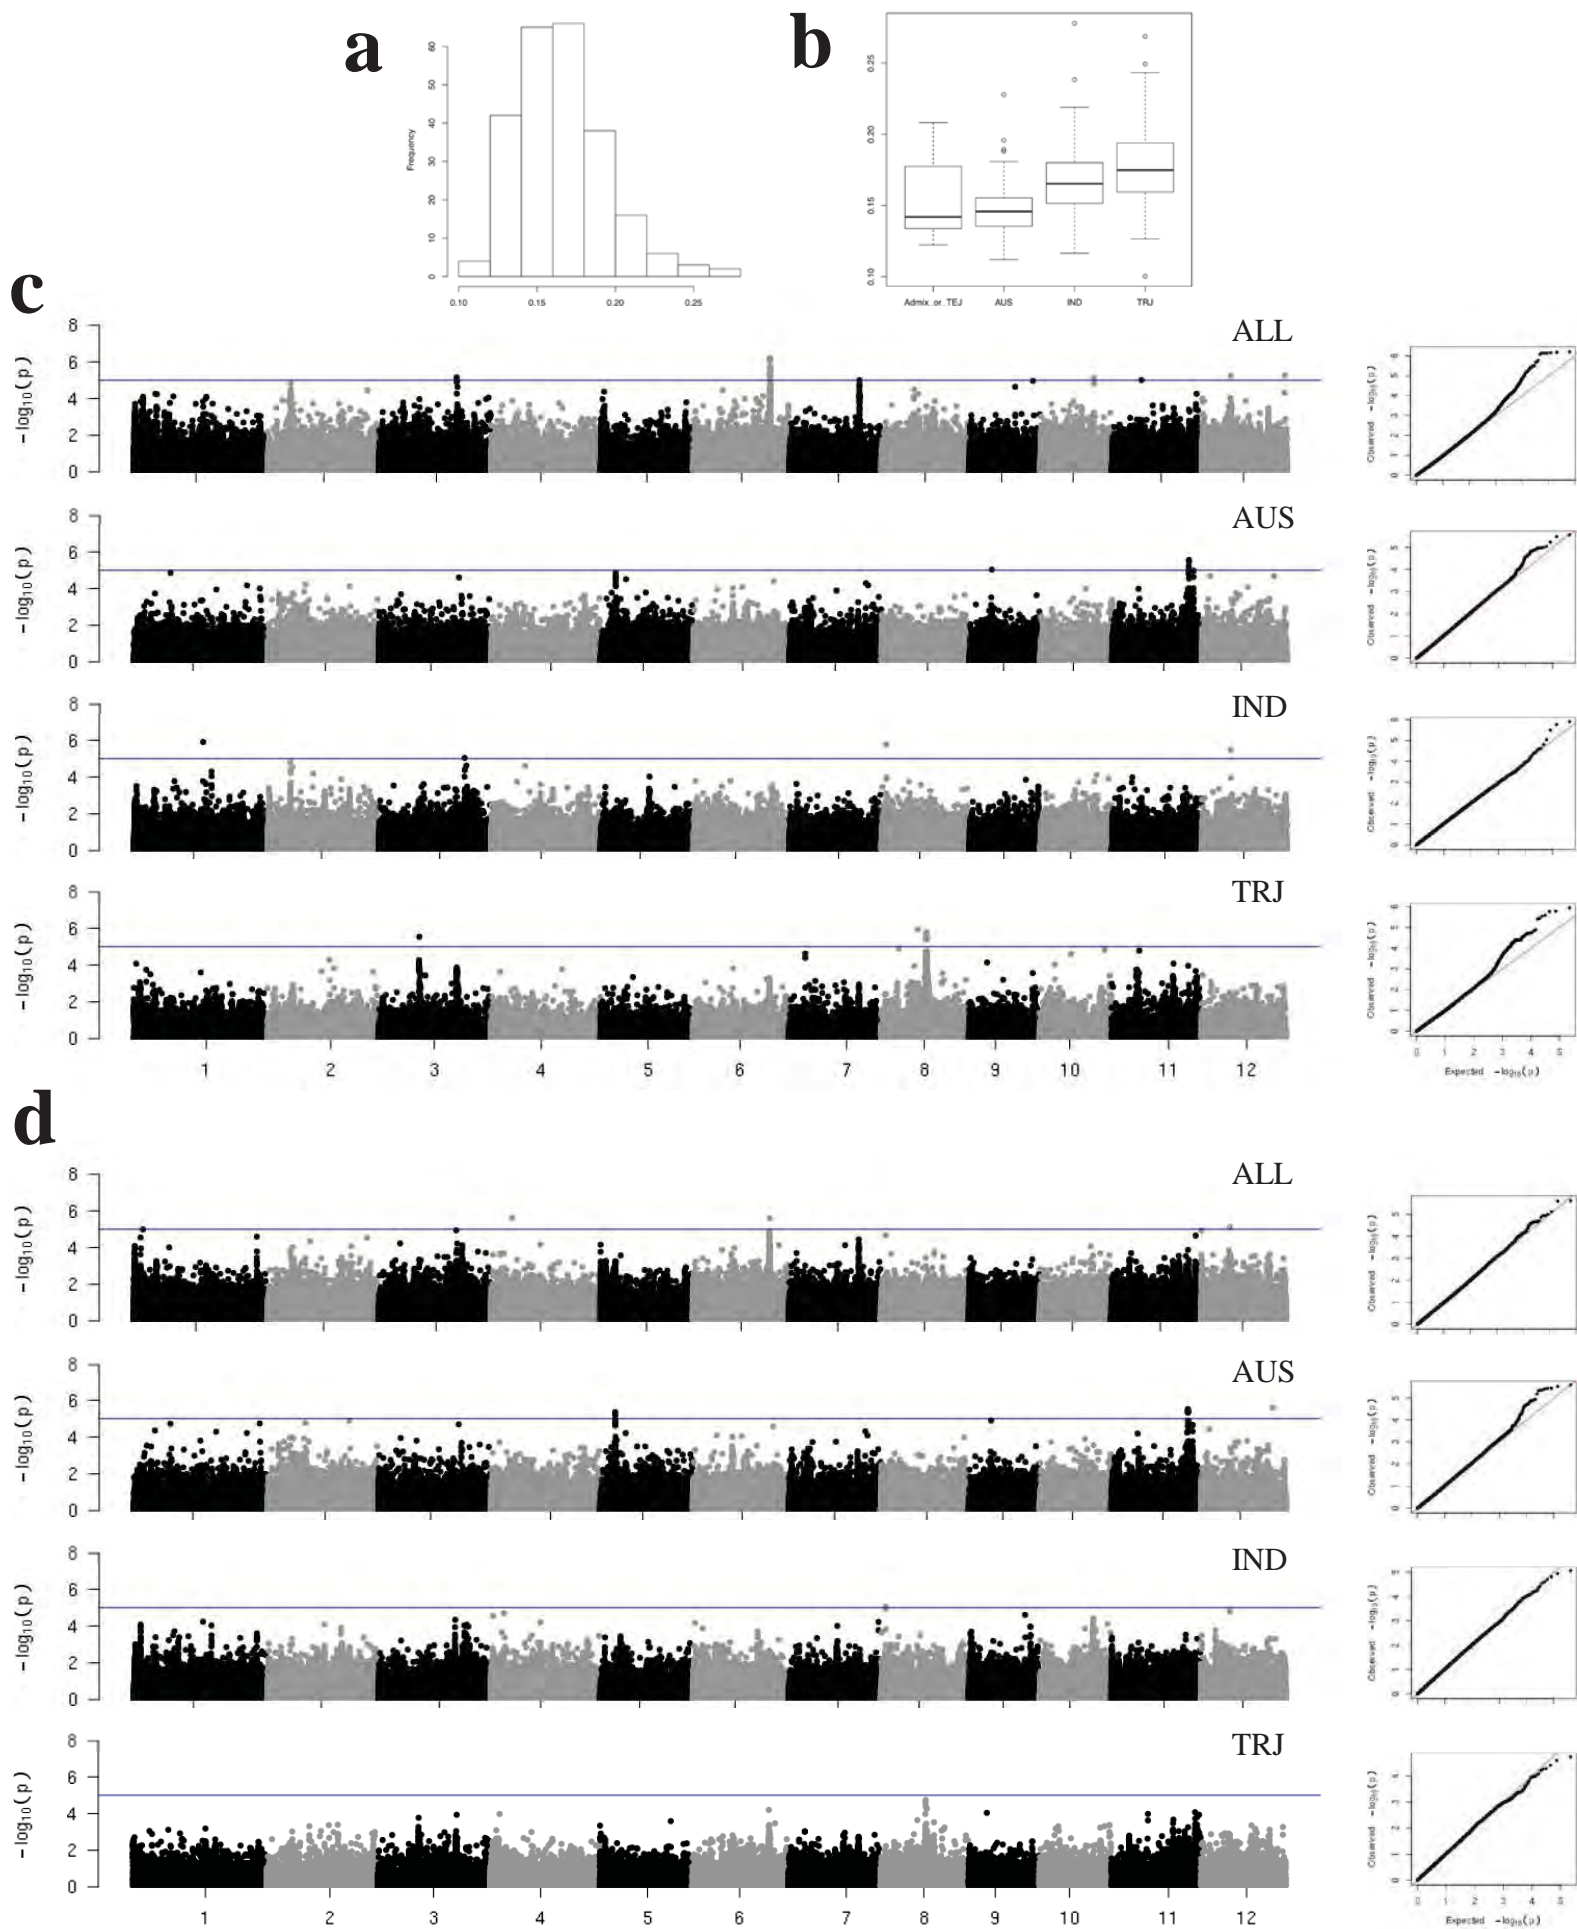

**Supplementary Figure 52. Summary of GWAS results for Thickness of Exsertion (cm).** (a, b) Phenotypic distributions. (c) Mixed model controlling for subpopulation structure across all varieties (ALL) and within individual subpopulations (AUS = *aus*, IND = *indica*, TRJ = *tropical japonica*). (d) Mixed model with heading date as a covariate.



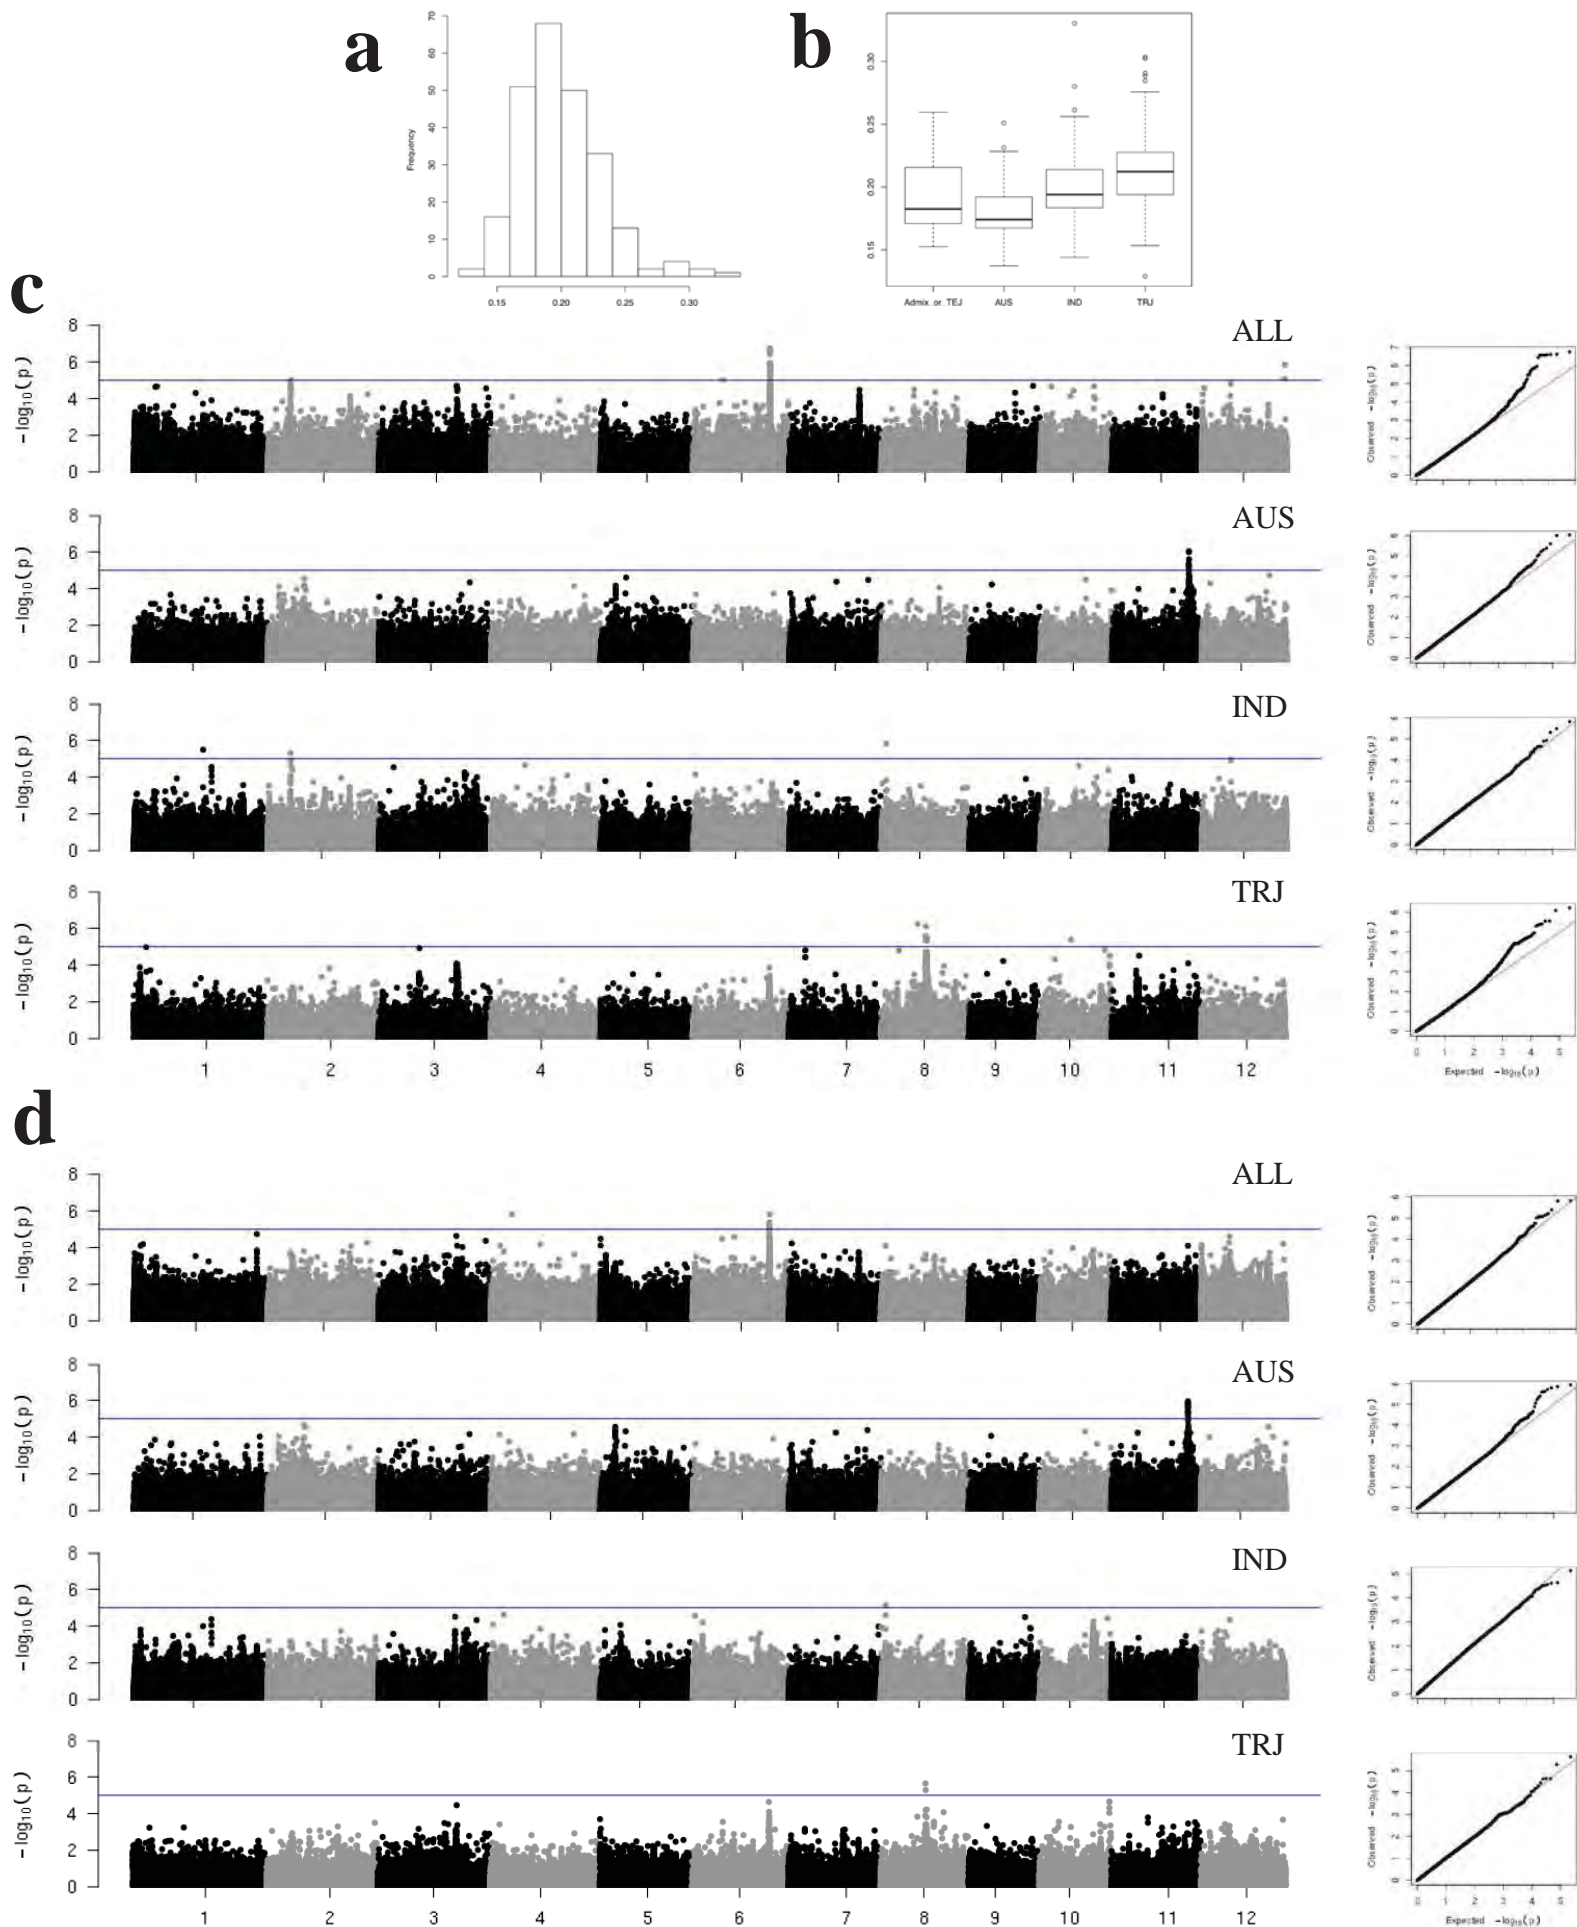

**Supplementary Figure 53. Summary of GWAS results for Maximum Thickness of Exsertion (cm).** (a, b) Phenotypic distributions. (c) Mixed model controlling for subpopulation structure across all varieties (ALL) and within individual subpopulations (AUS = *aus*, IND = *indica*, TRJ = *tropical japonica*). (d) Mixed model with heading date as a covariate.



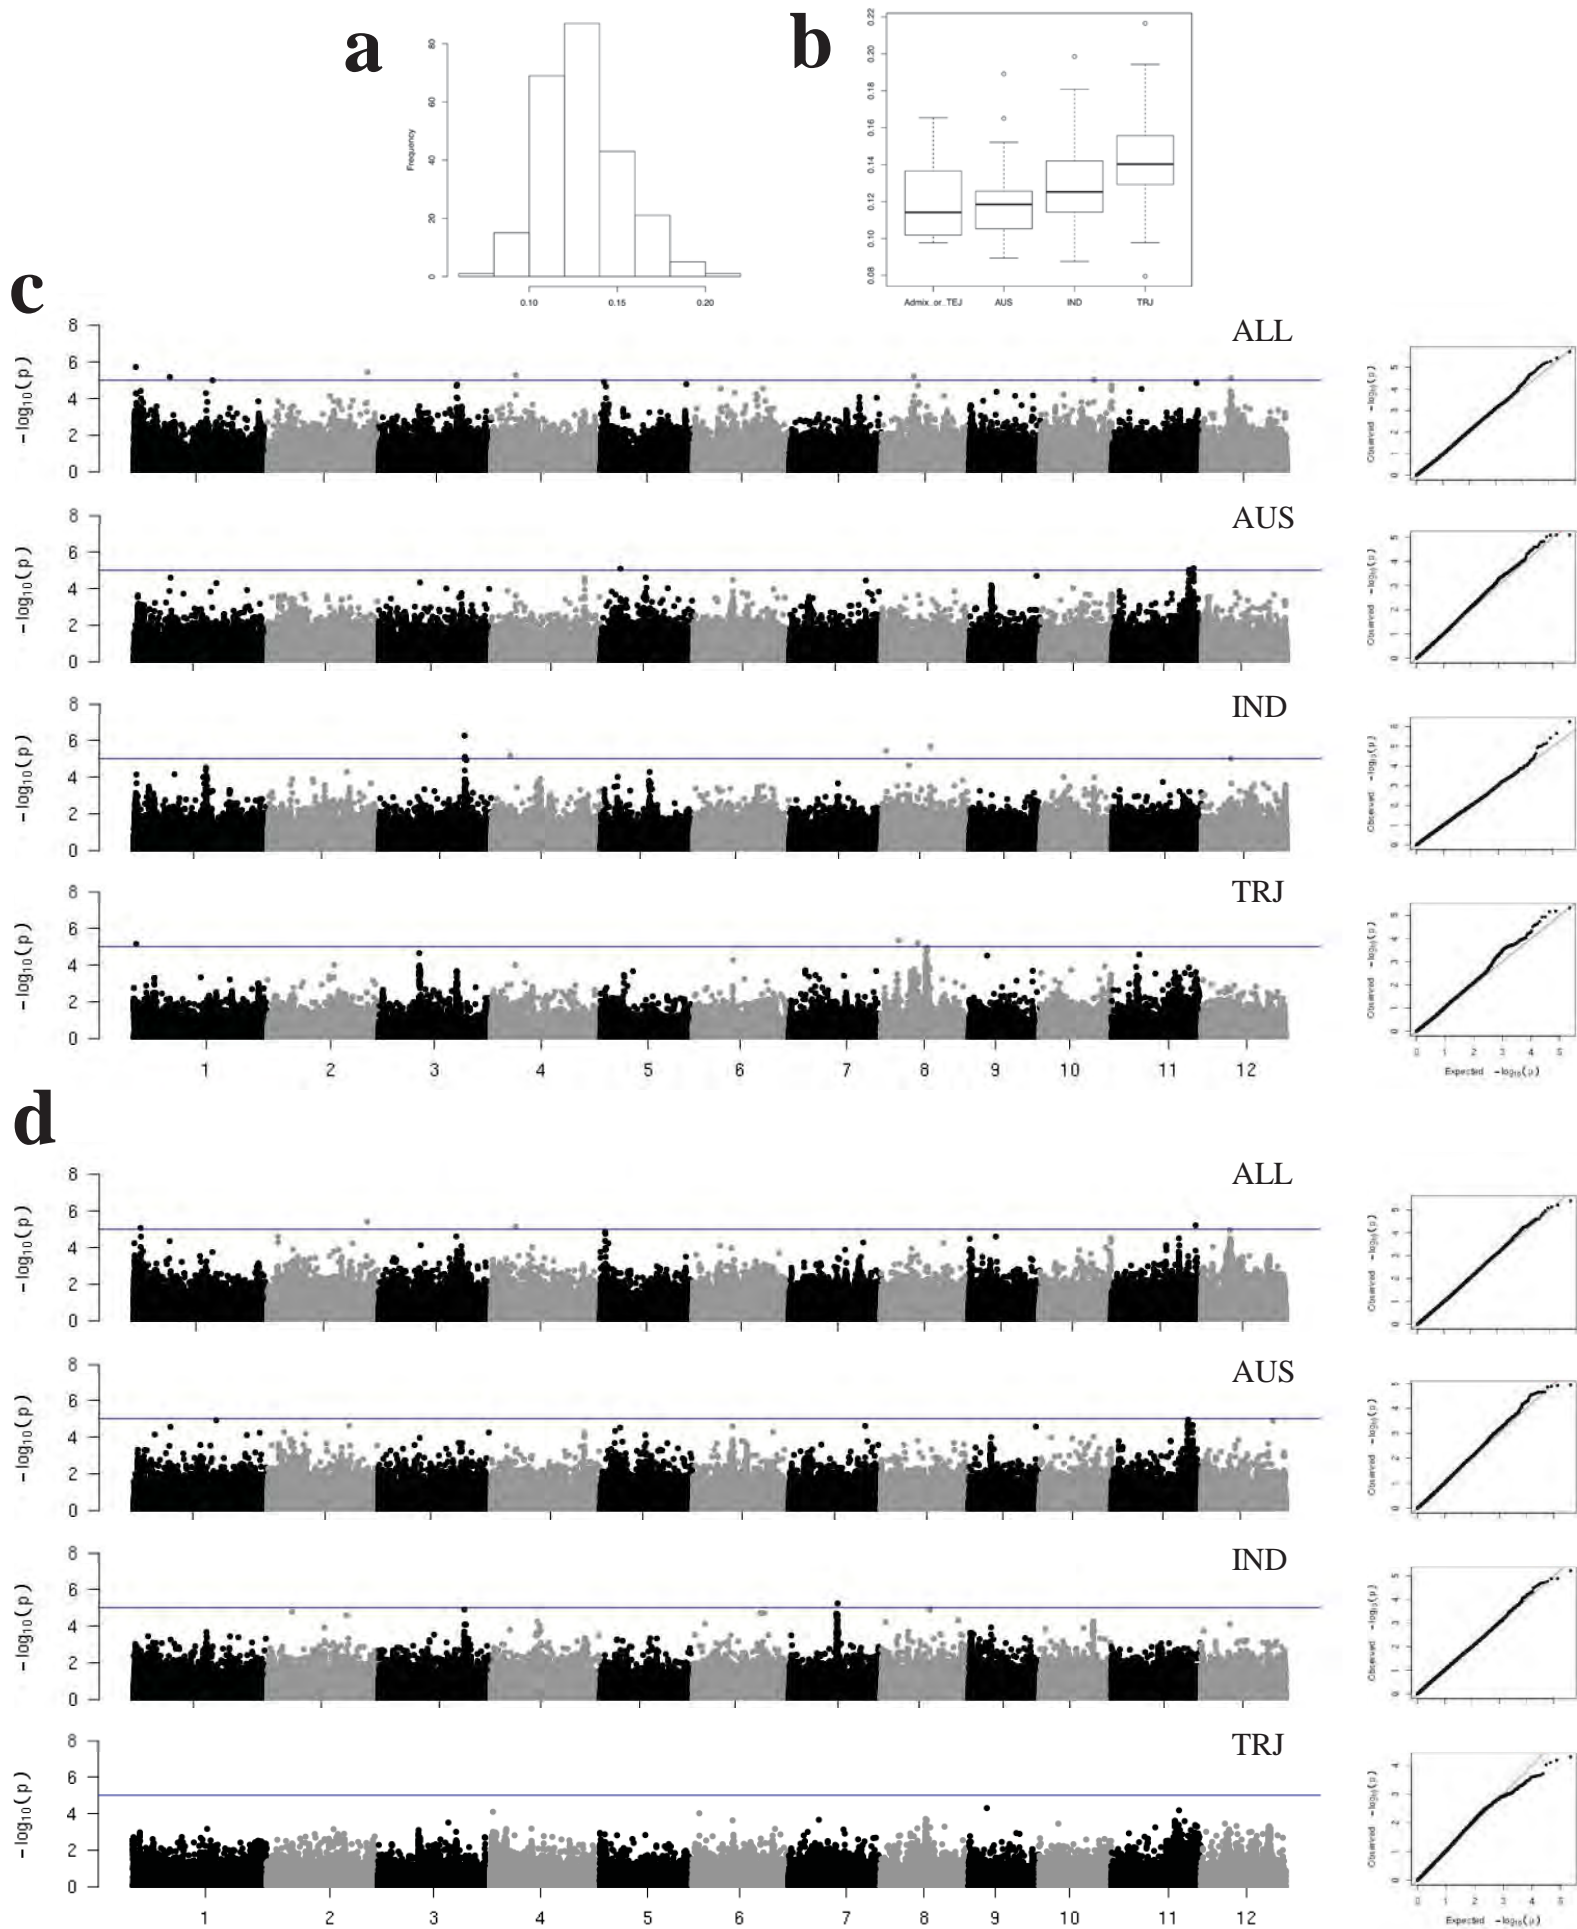

**Supplementary Figure 54. Summary of GWAS results for Minimum Thickness of Exsertion (cm).** (a, b) Phenotypic distributions. (c) Mixed model controlling for subpopulation structure across all varieties (ALL) and within individual subpopulations (AUS = *aus*, IND = *indica*, TRJ = *tropical japonica*). (d) Mixed model with heading date as a covariate.

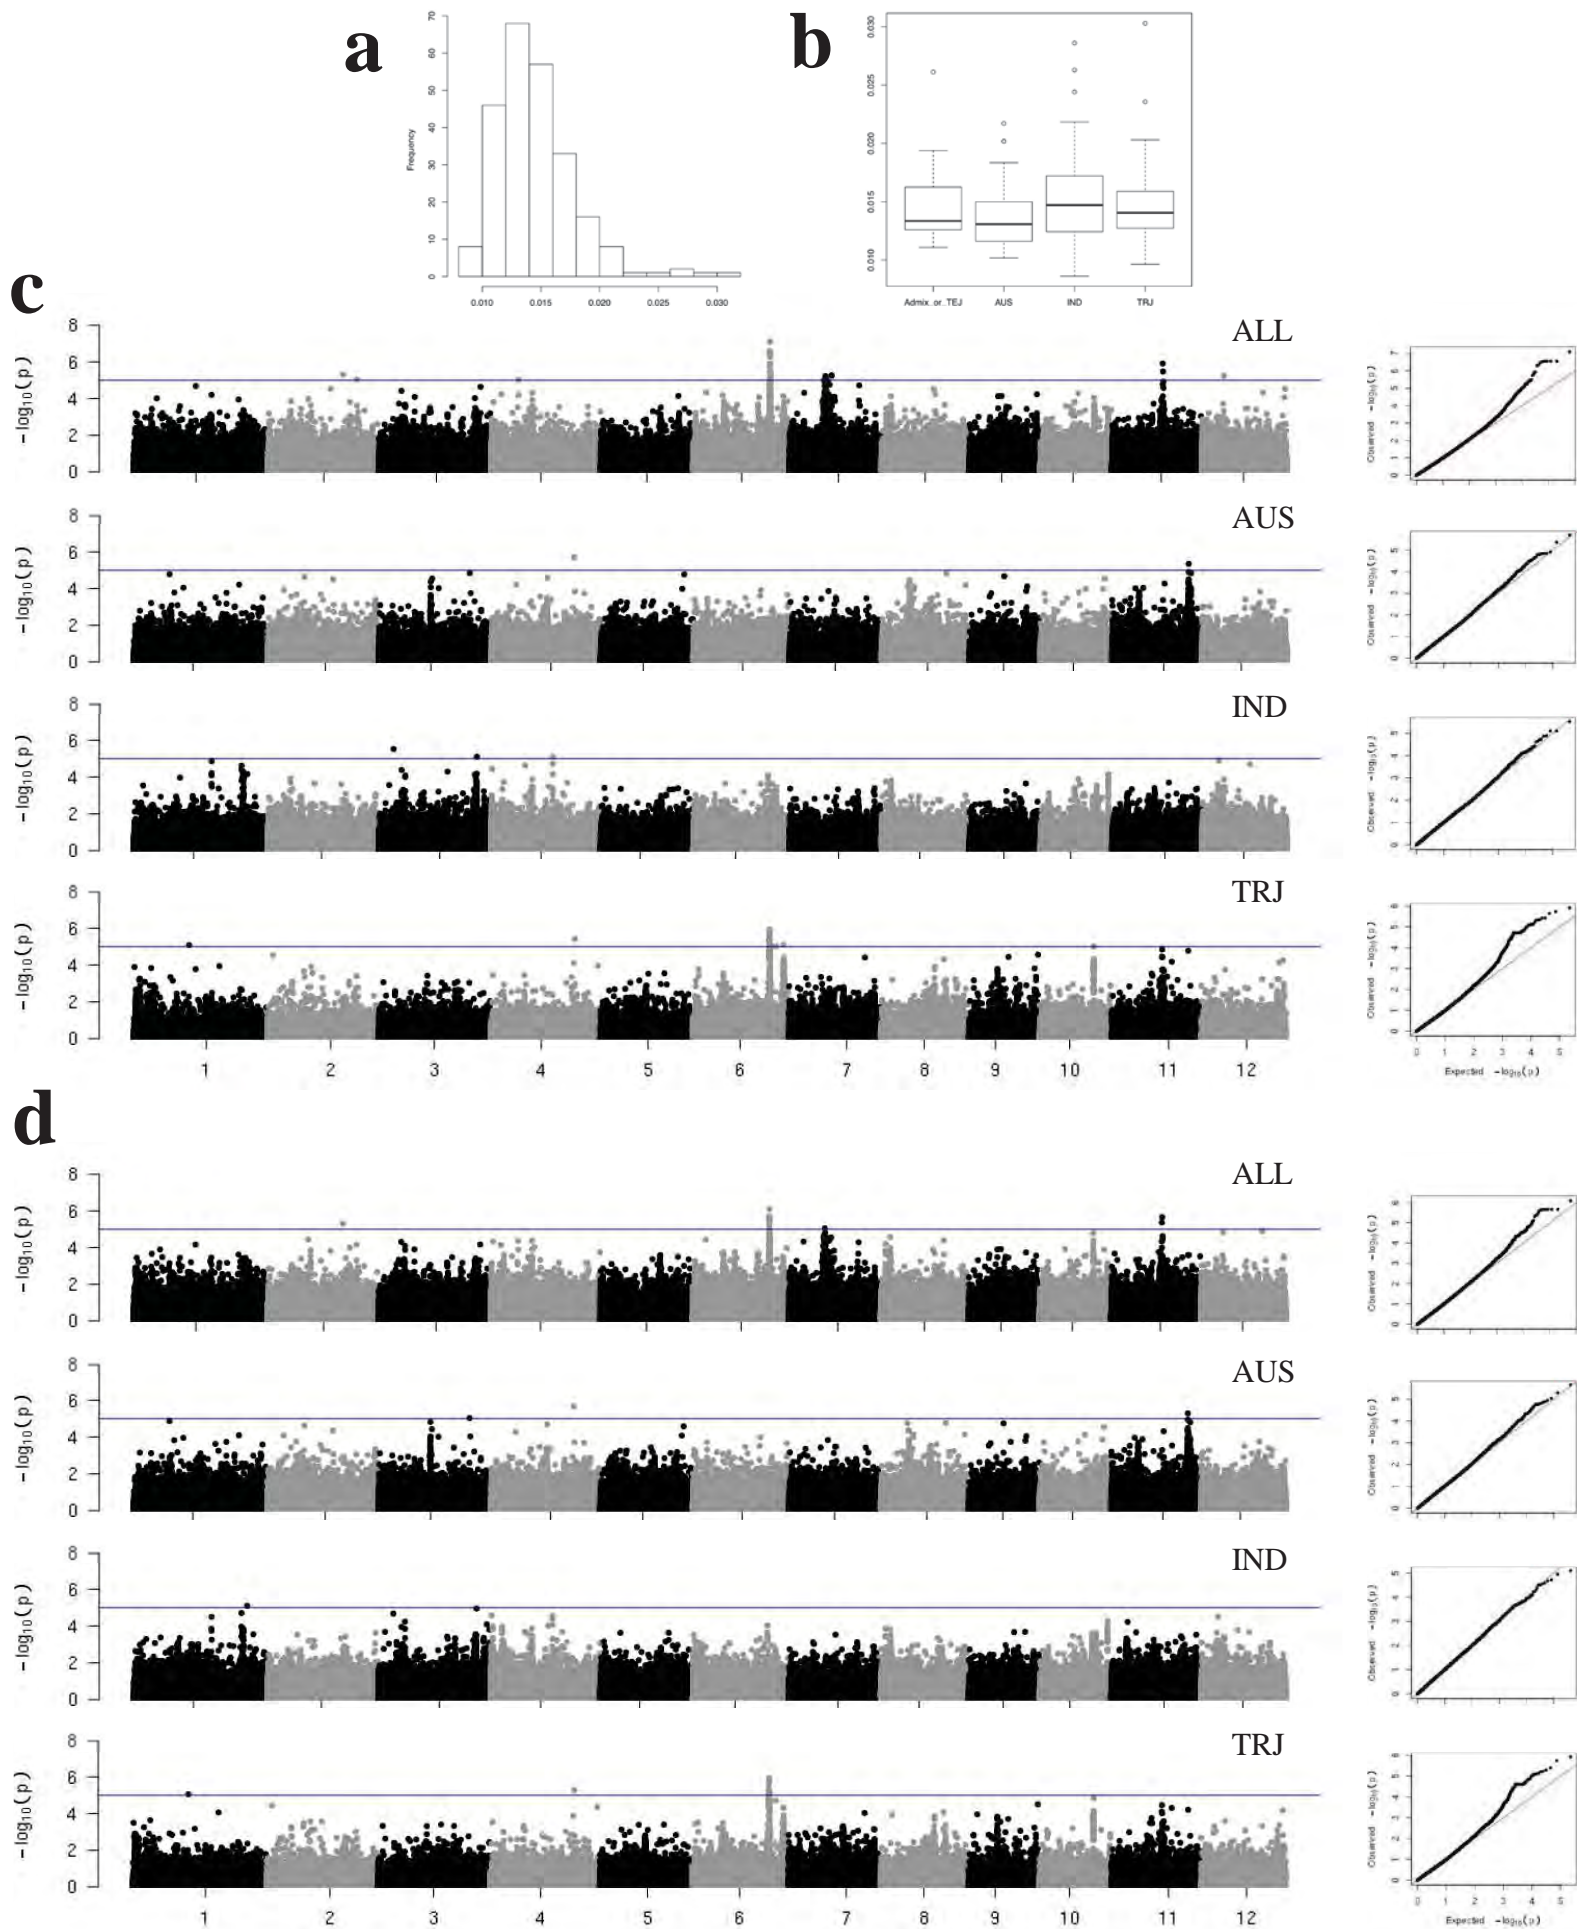

**Supplementary Figure 55. Summary of GWAS results for Thickness of Exsertion Standard Deviation (cm).** (a, b) Phenotypic distributions. (c) Mixed model controlling for subpopulation structure across all varieties (ALL) and within individual subpopulations (AUS = *aus*, IND = *indica*, TRJ = *tropical japonica*). (d) Mixed model with heading date as a covariate.



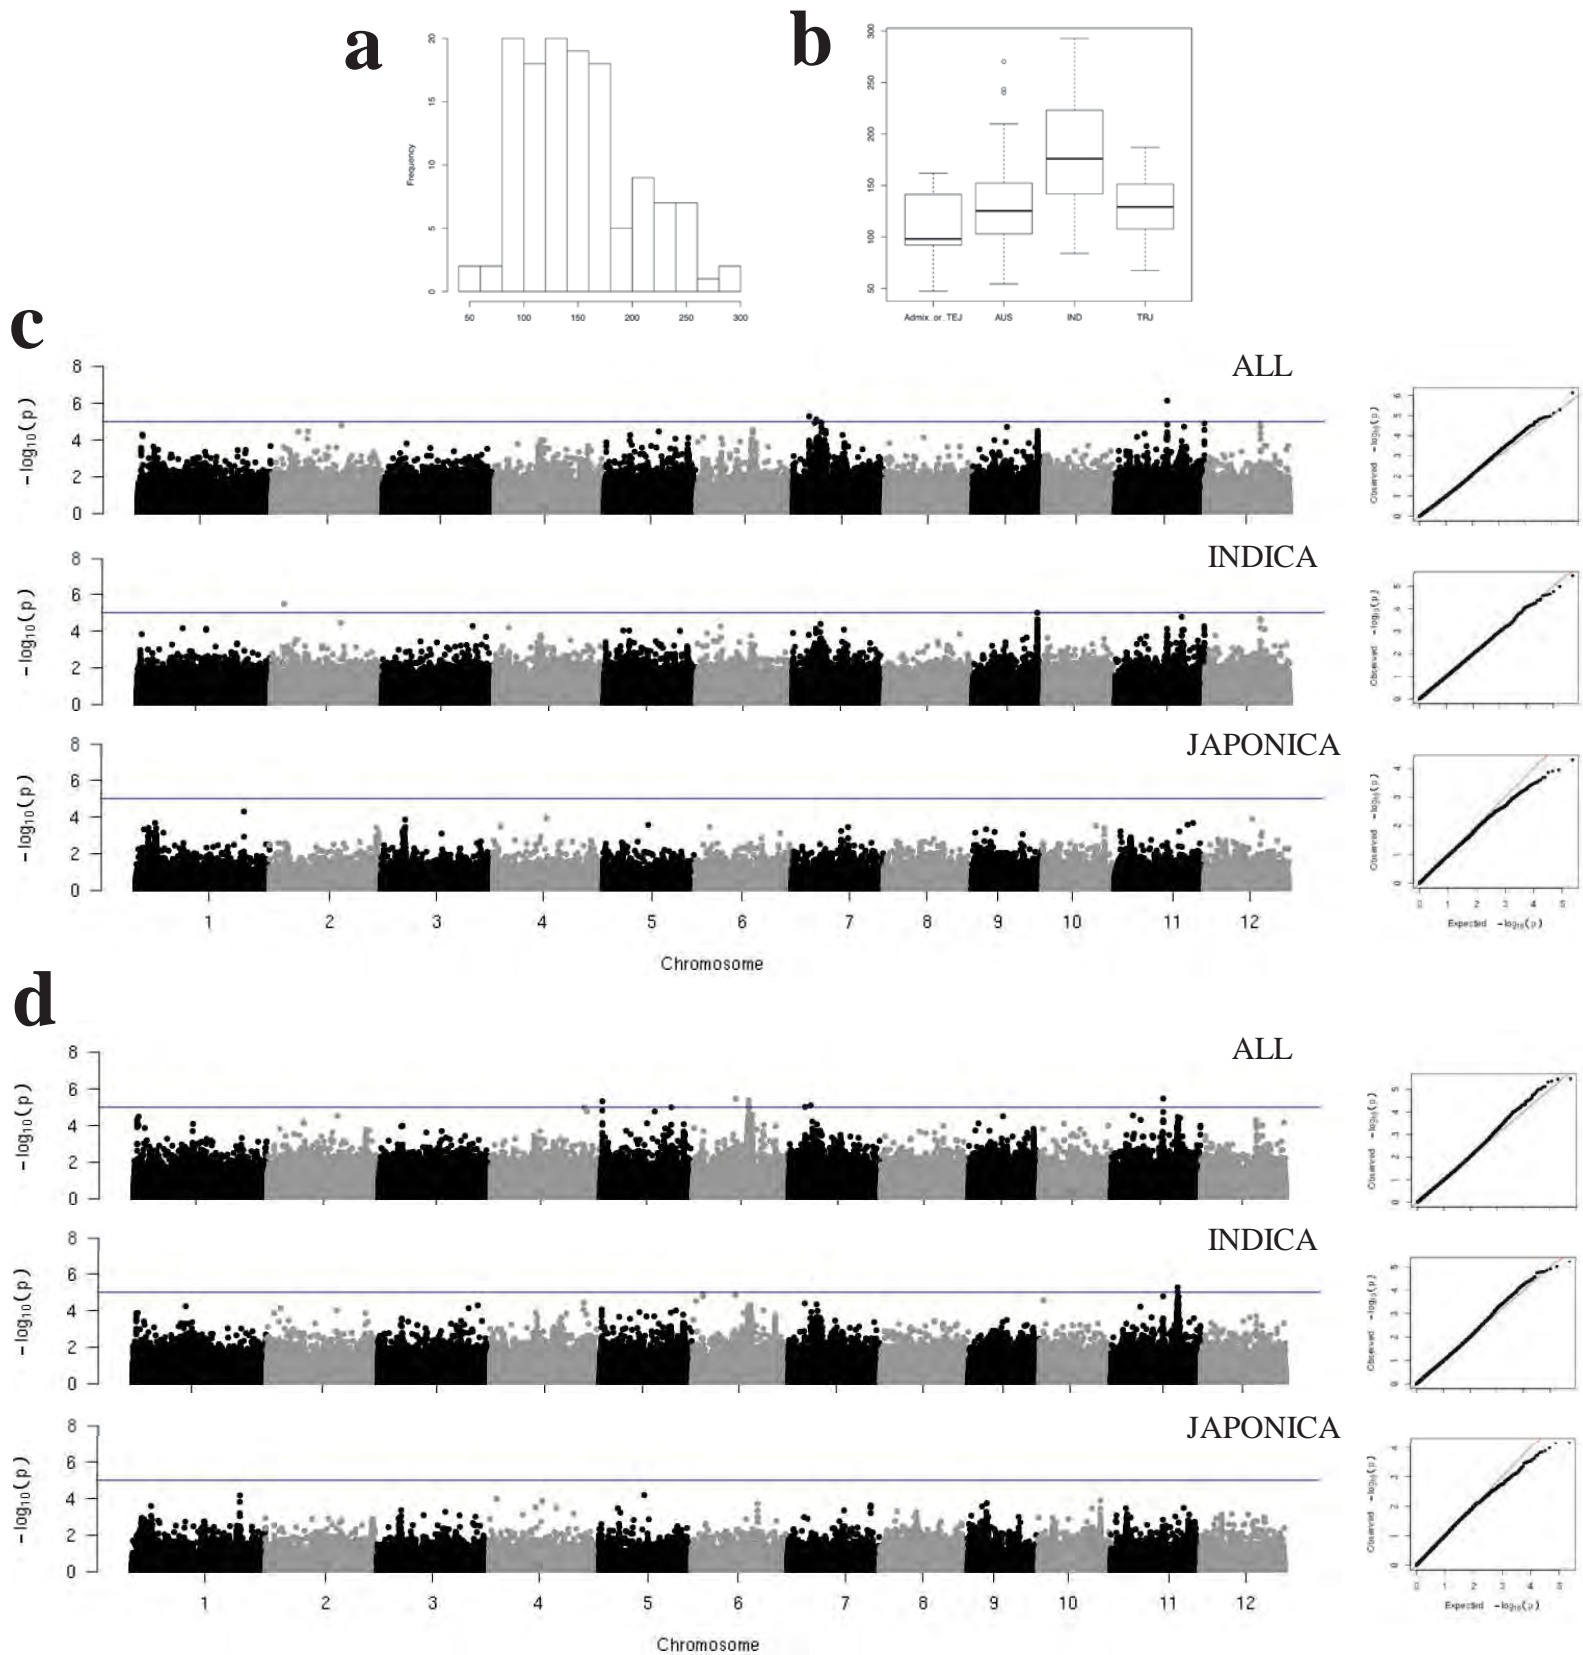

**Supplementary Figure 56. Summary of GWAS results for Panicle Weight (g).** (a, b) Phenotypic distributions. (c) Mixed model controlling for subpopulation structure across all varieties (ALL) and within the two major varietal groups *Indica* (INDICA) and *Japonica* (JAPONICA). (d) Mixed model with heading date as a covariate.



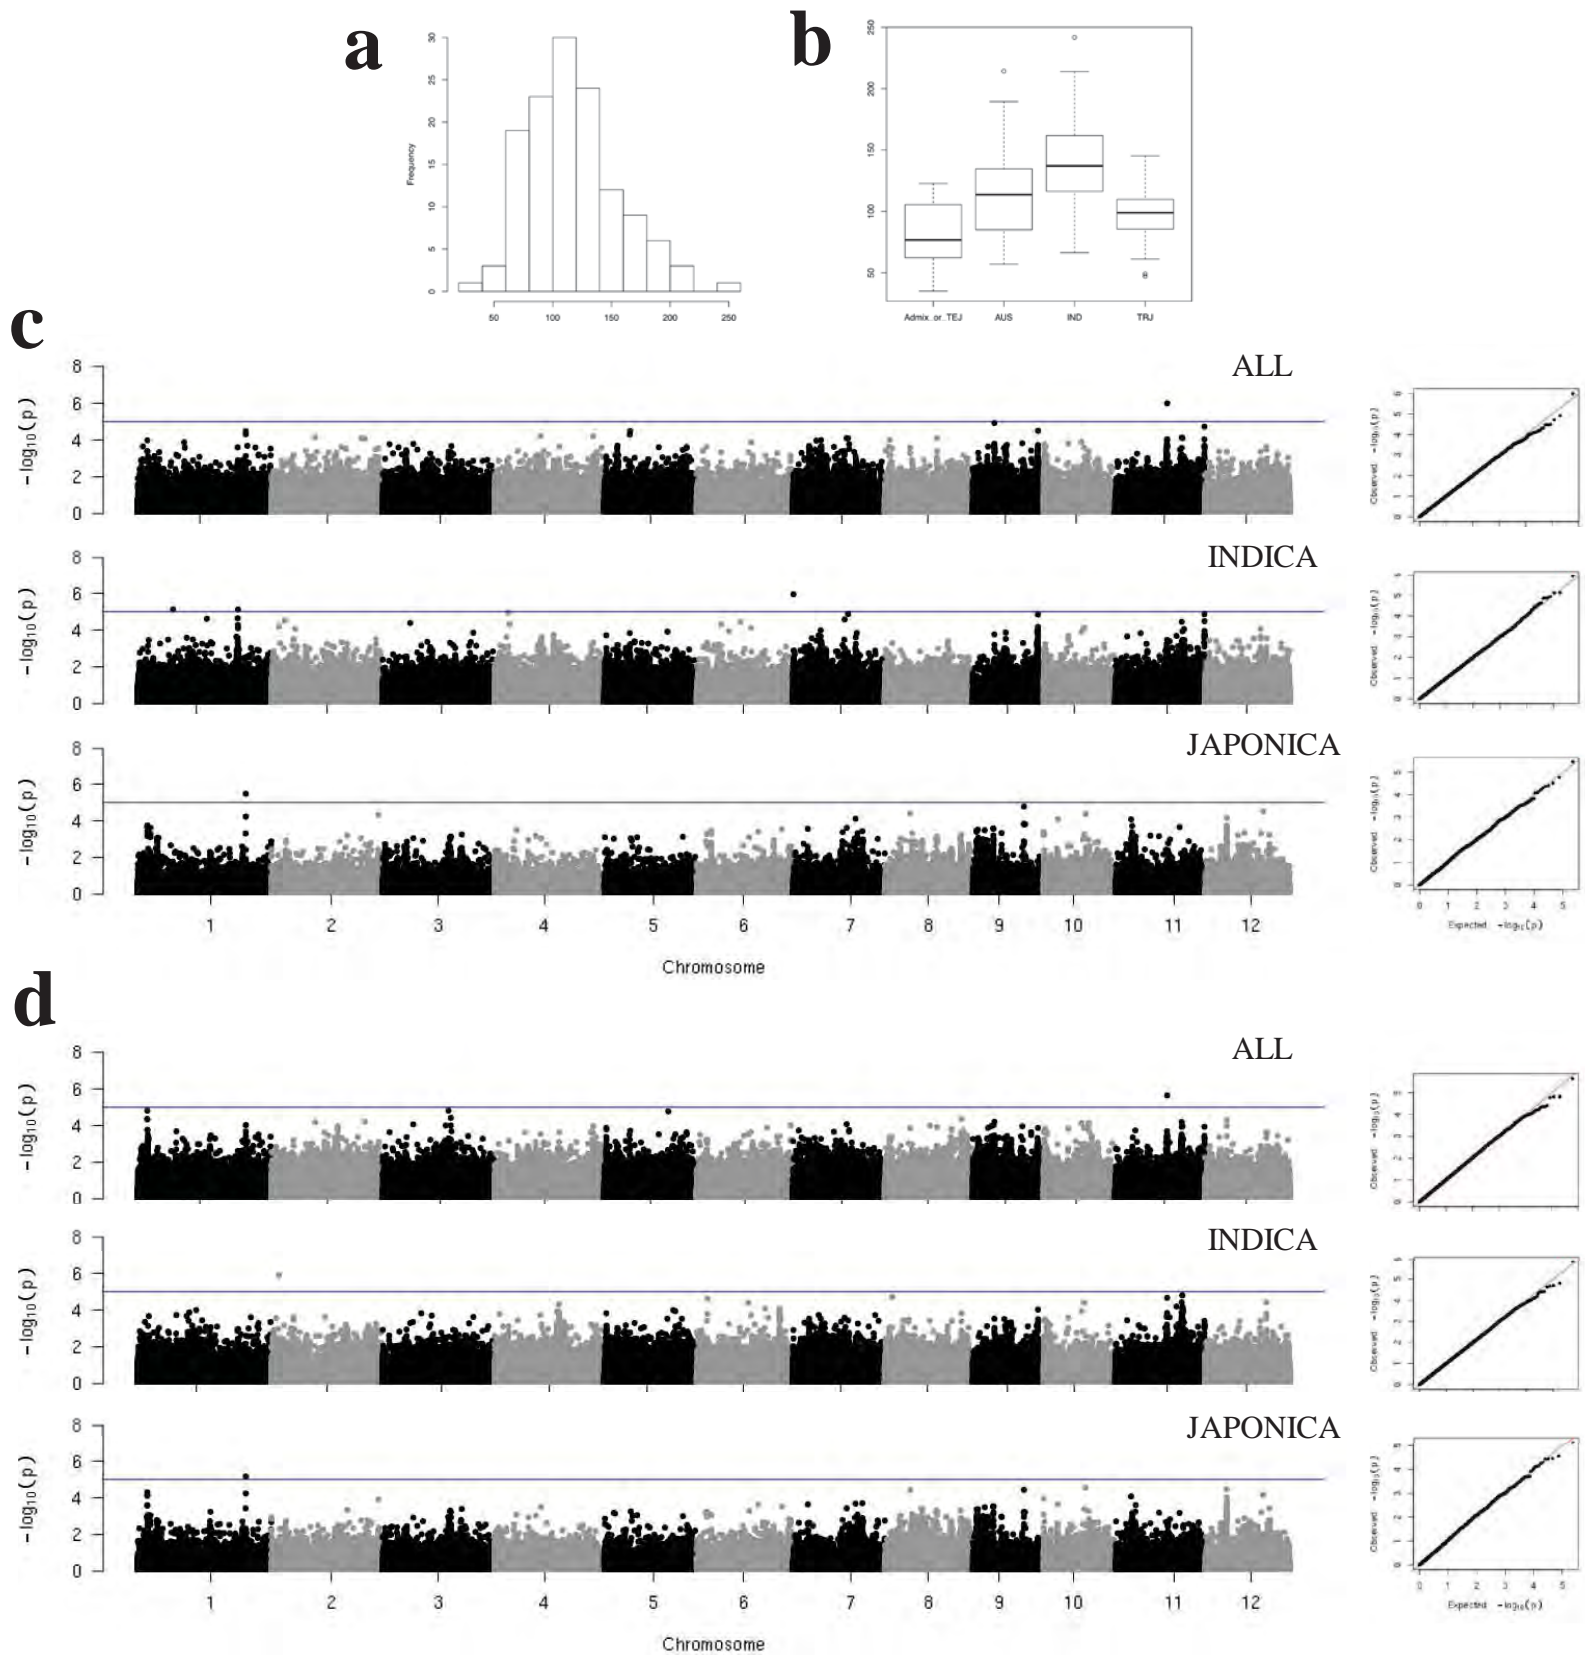

**Supplementary Figure 57. Summary of GWAS results for Total Grain Weight (g).** (a, b) Phenotypic distributions. (c) Mixed model controlling for subpopulation structure across all varieties (ALL) and within the two major varietal groups *Indica* (INDICA) and *Japonica* (JAPONICA). (d) Mixed model with heading date as a covariate.

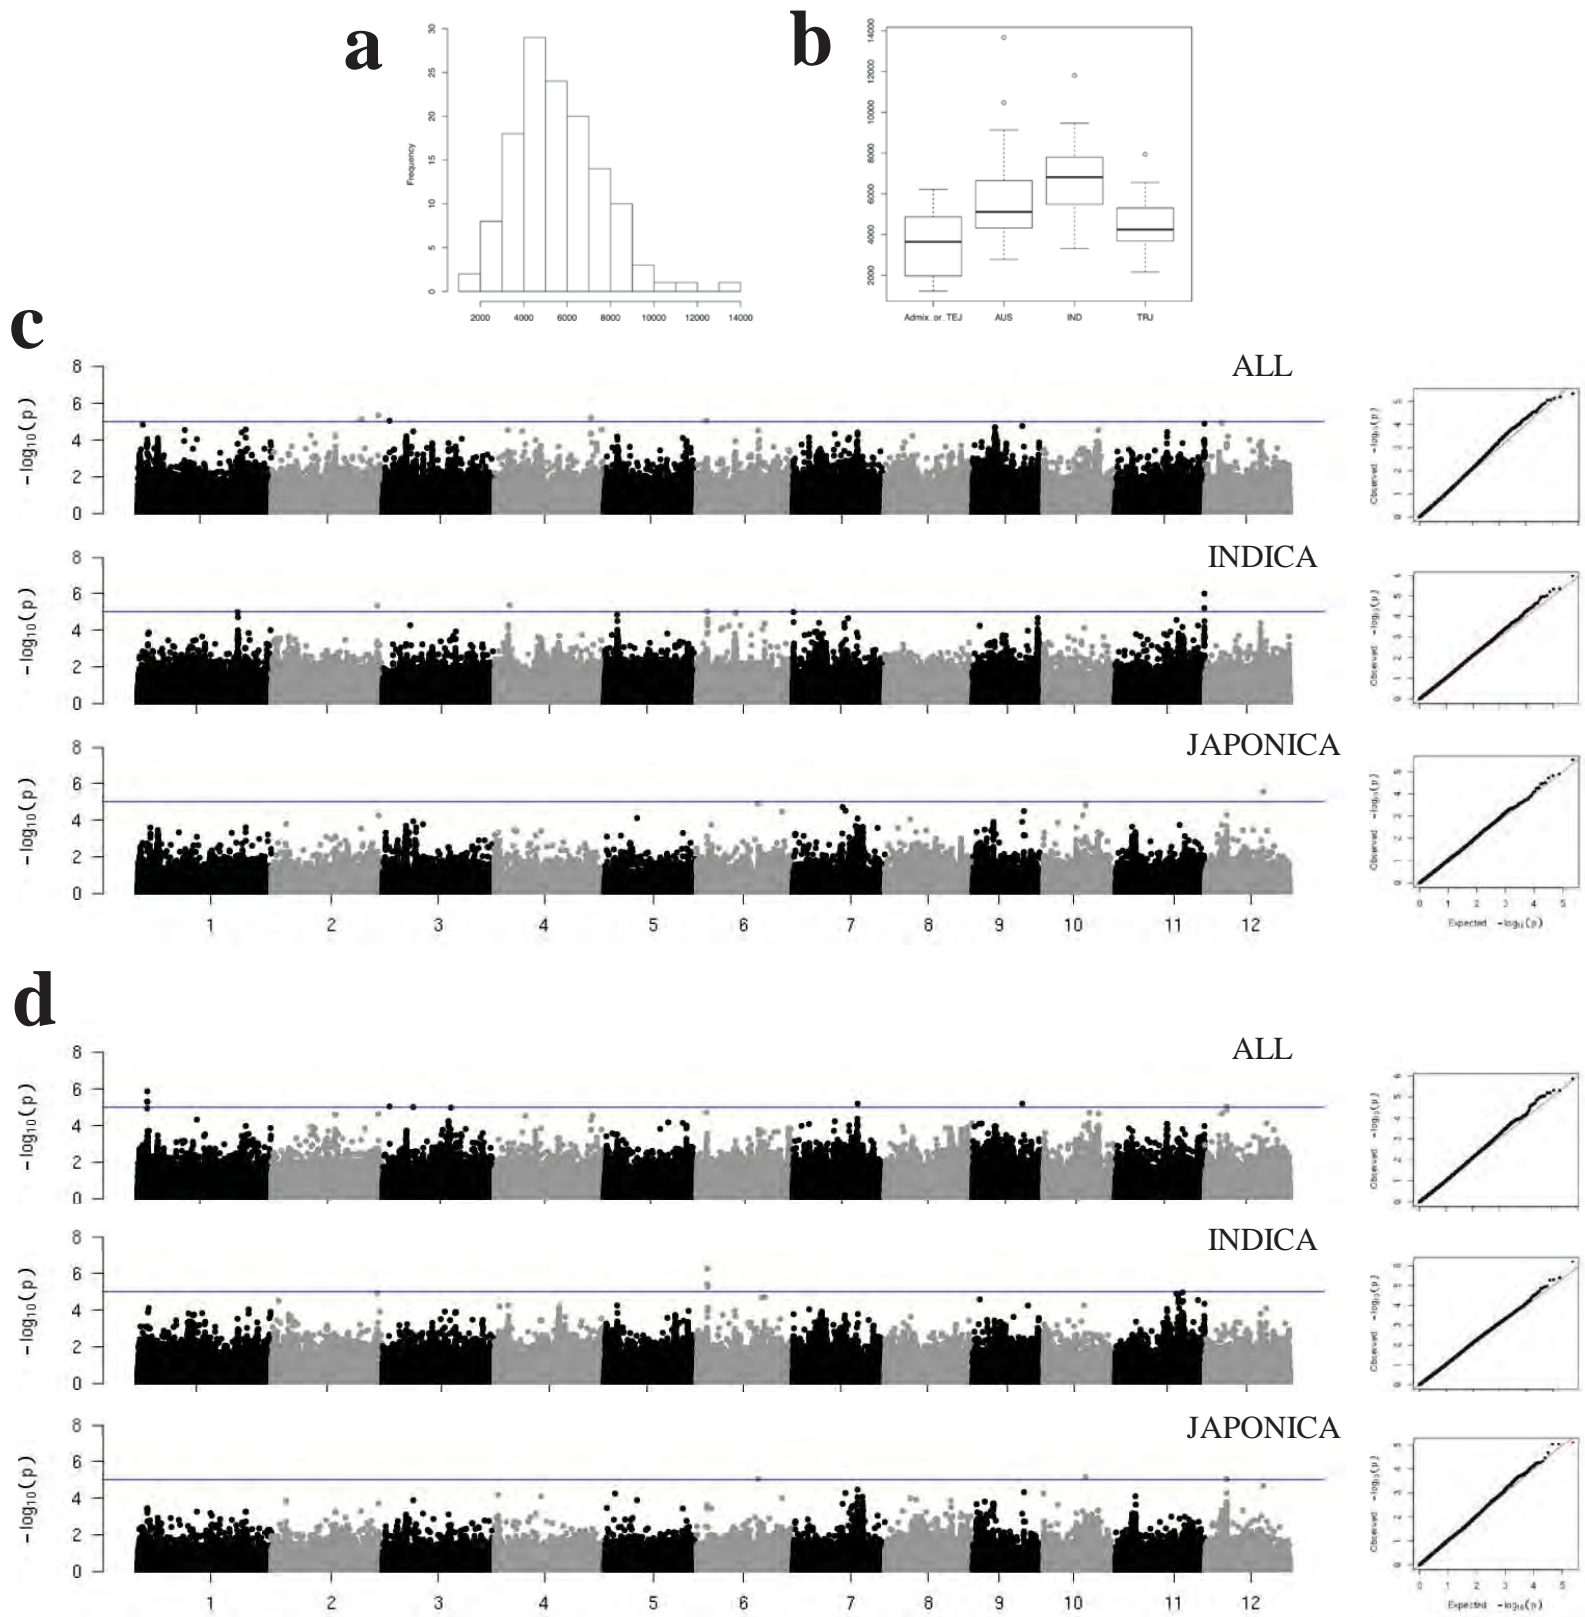

**Supplementary Figure 58. Summary of GWAS results for Grain Number.** (a, b) Phenotypic distributions. (c) Mixed model controlling for subpopulation structure across all varieties (ALL) and within the two major varietal groups *Indica* (INDICA) and *Japonica* (JAPONICA). (d) Mixed model with heading date as a covariate.

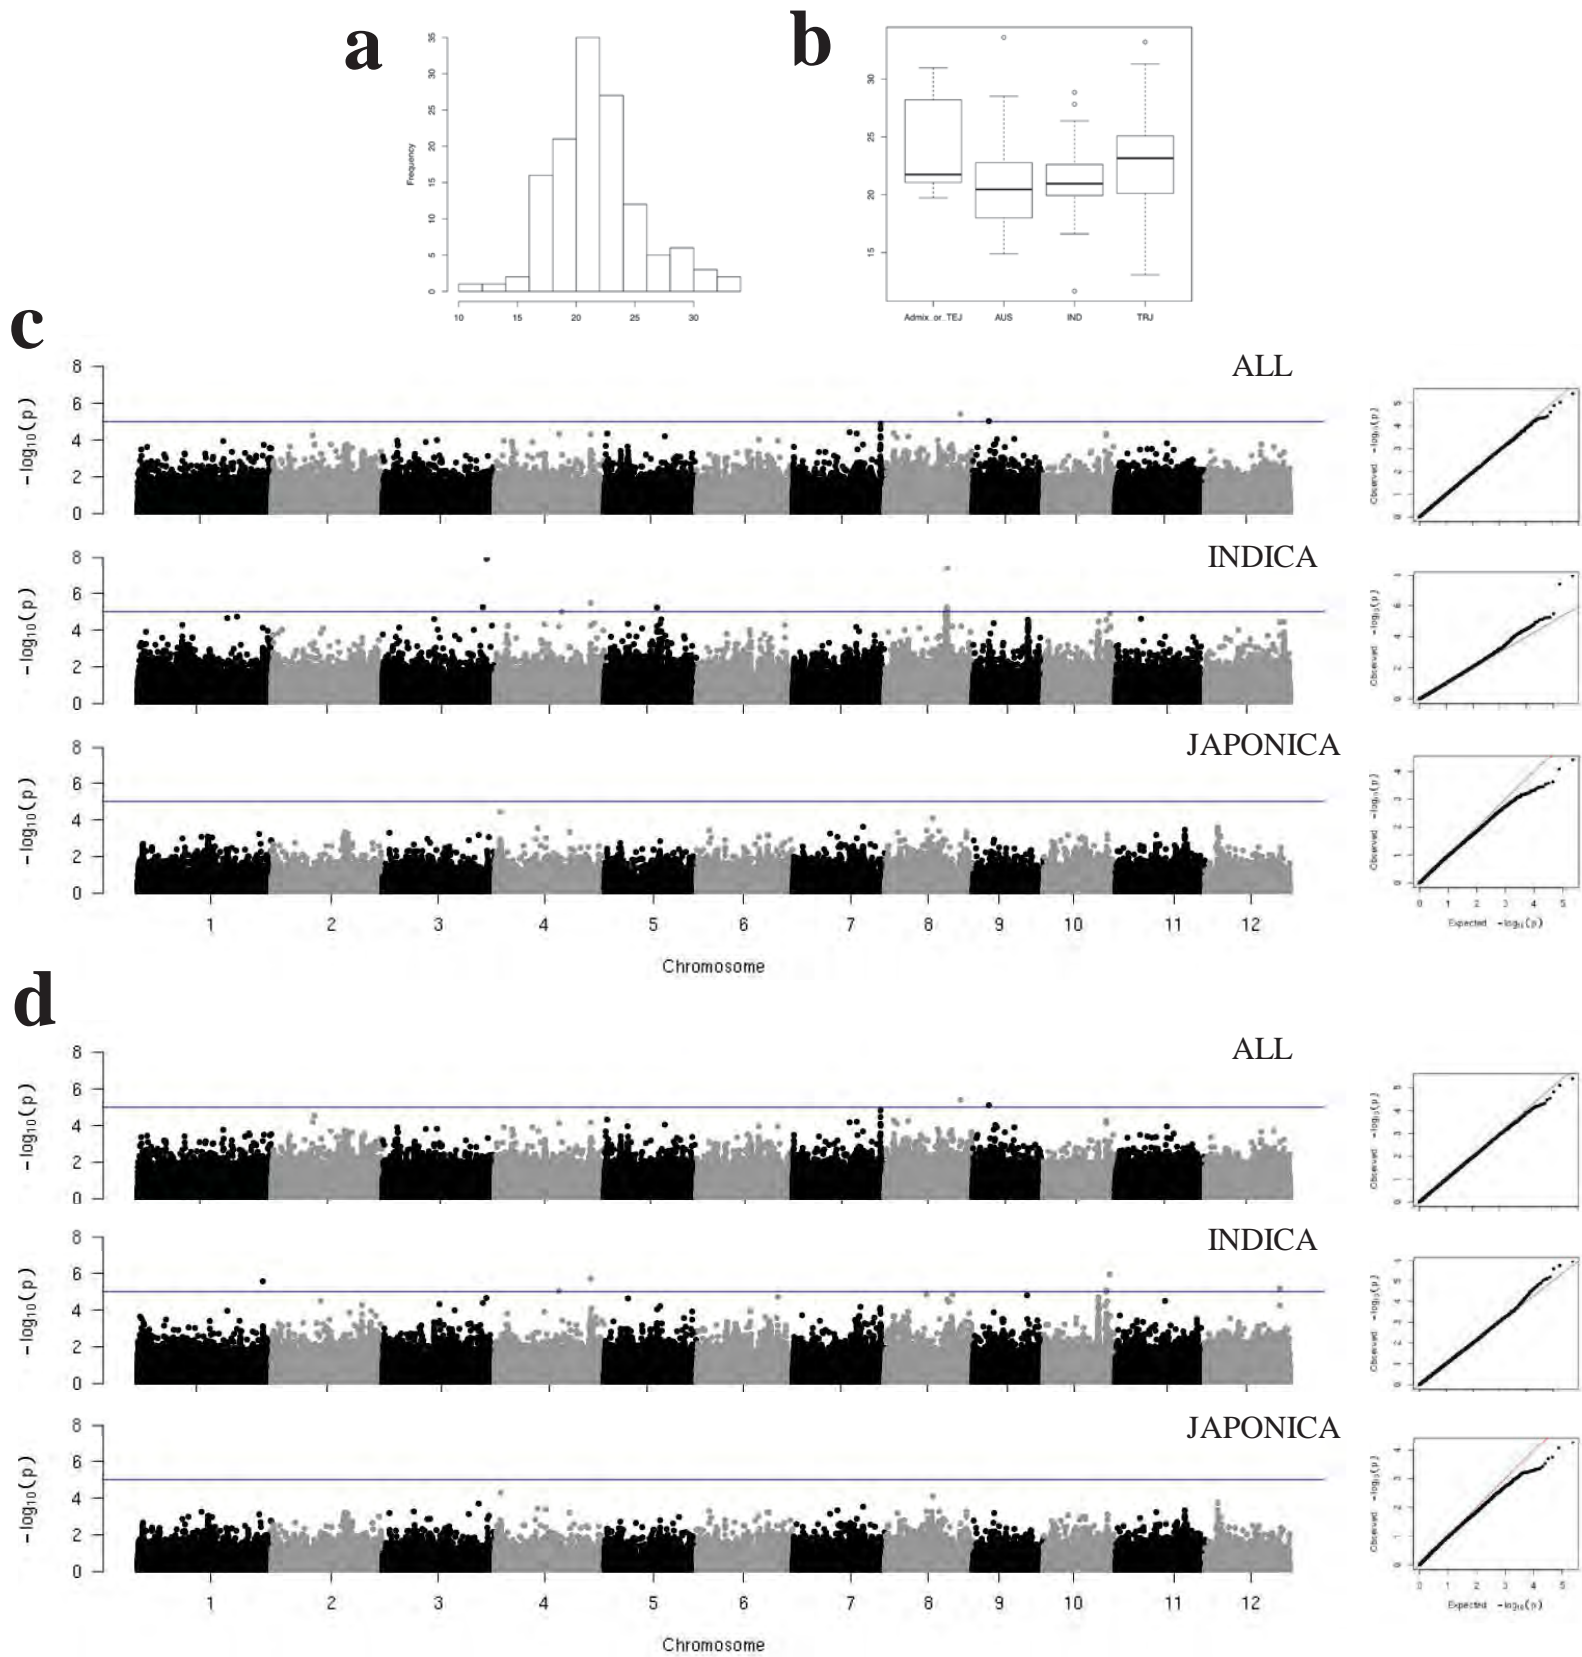

**Supplementary Figure 59. Summary of GWAS results for 1000 Grain Weight (g).** (a, b) Phenotypic distributions. (c) Mixed model controlling for subpopulation structure across all varieties (ALL) and within the two major varietal groups *Indica* (INDICA) and *Japonica* (JAPONICA). (d) Mixed model with heading date as a covariate.



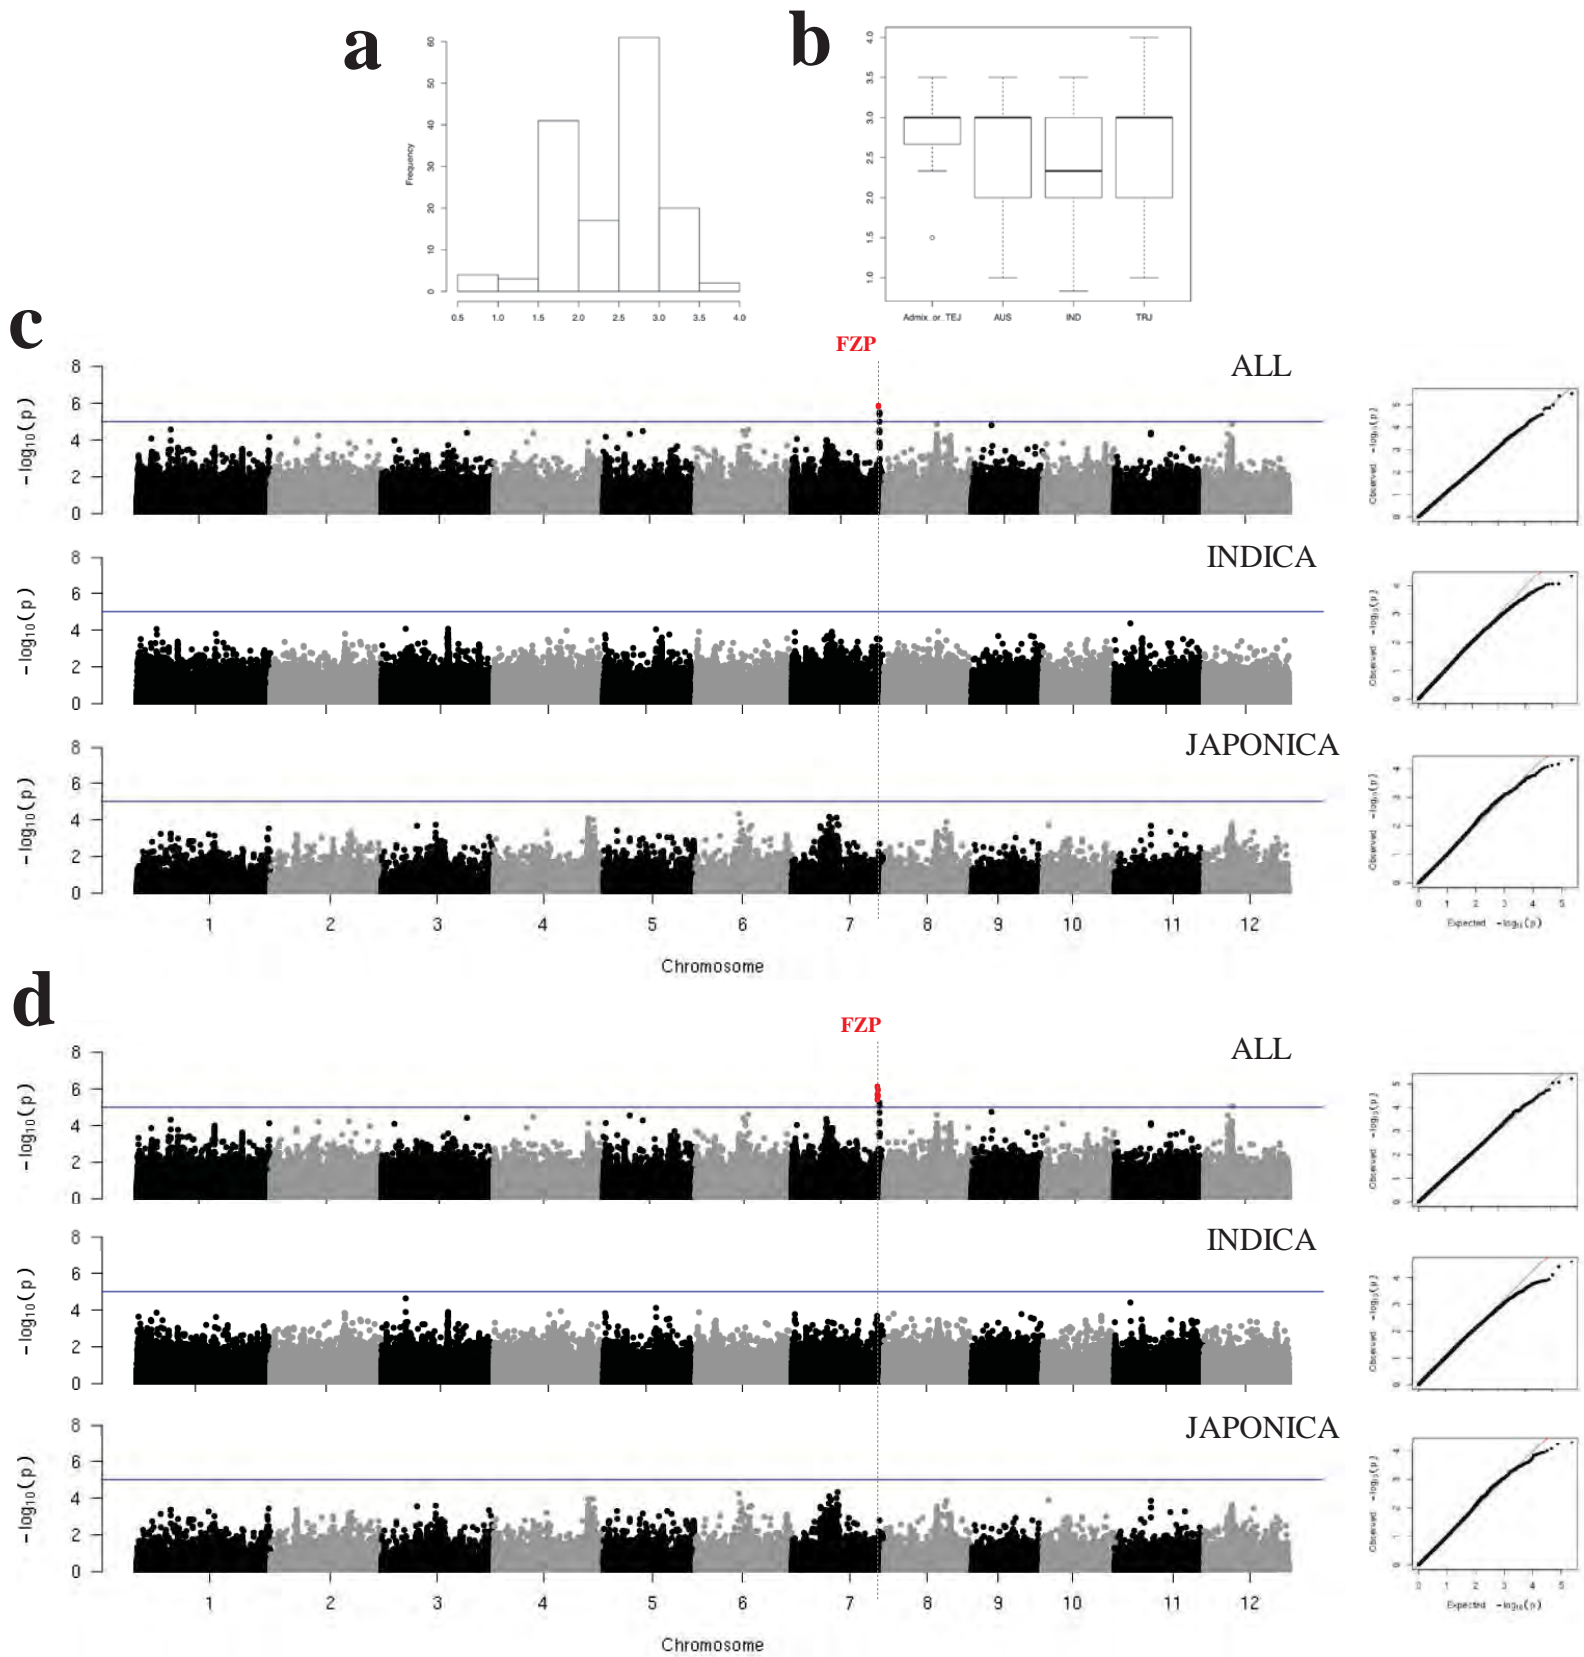

**Supplementary Figure 60. Summary of GWAS results for Secondary Panicle Branching.** (a, b) Phenotypic distributions. (c) Mixed model controlling for subpopulation structure across all varieties (ALL) and within the two major varietal groups *Indica* (INDICA) and *Japonica* (JAPONICA). (d) Mixed model with heading date as a covariate.

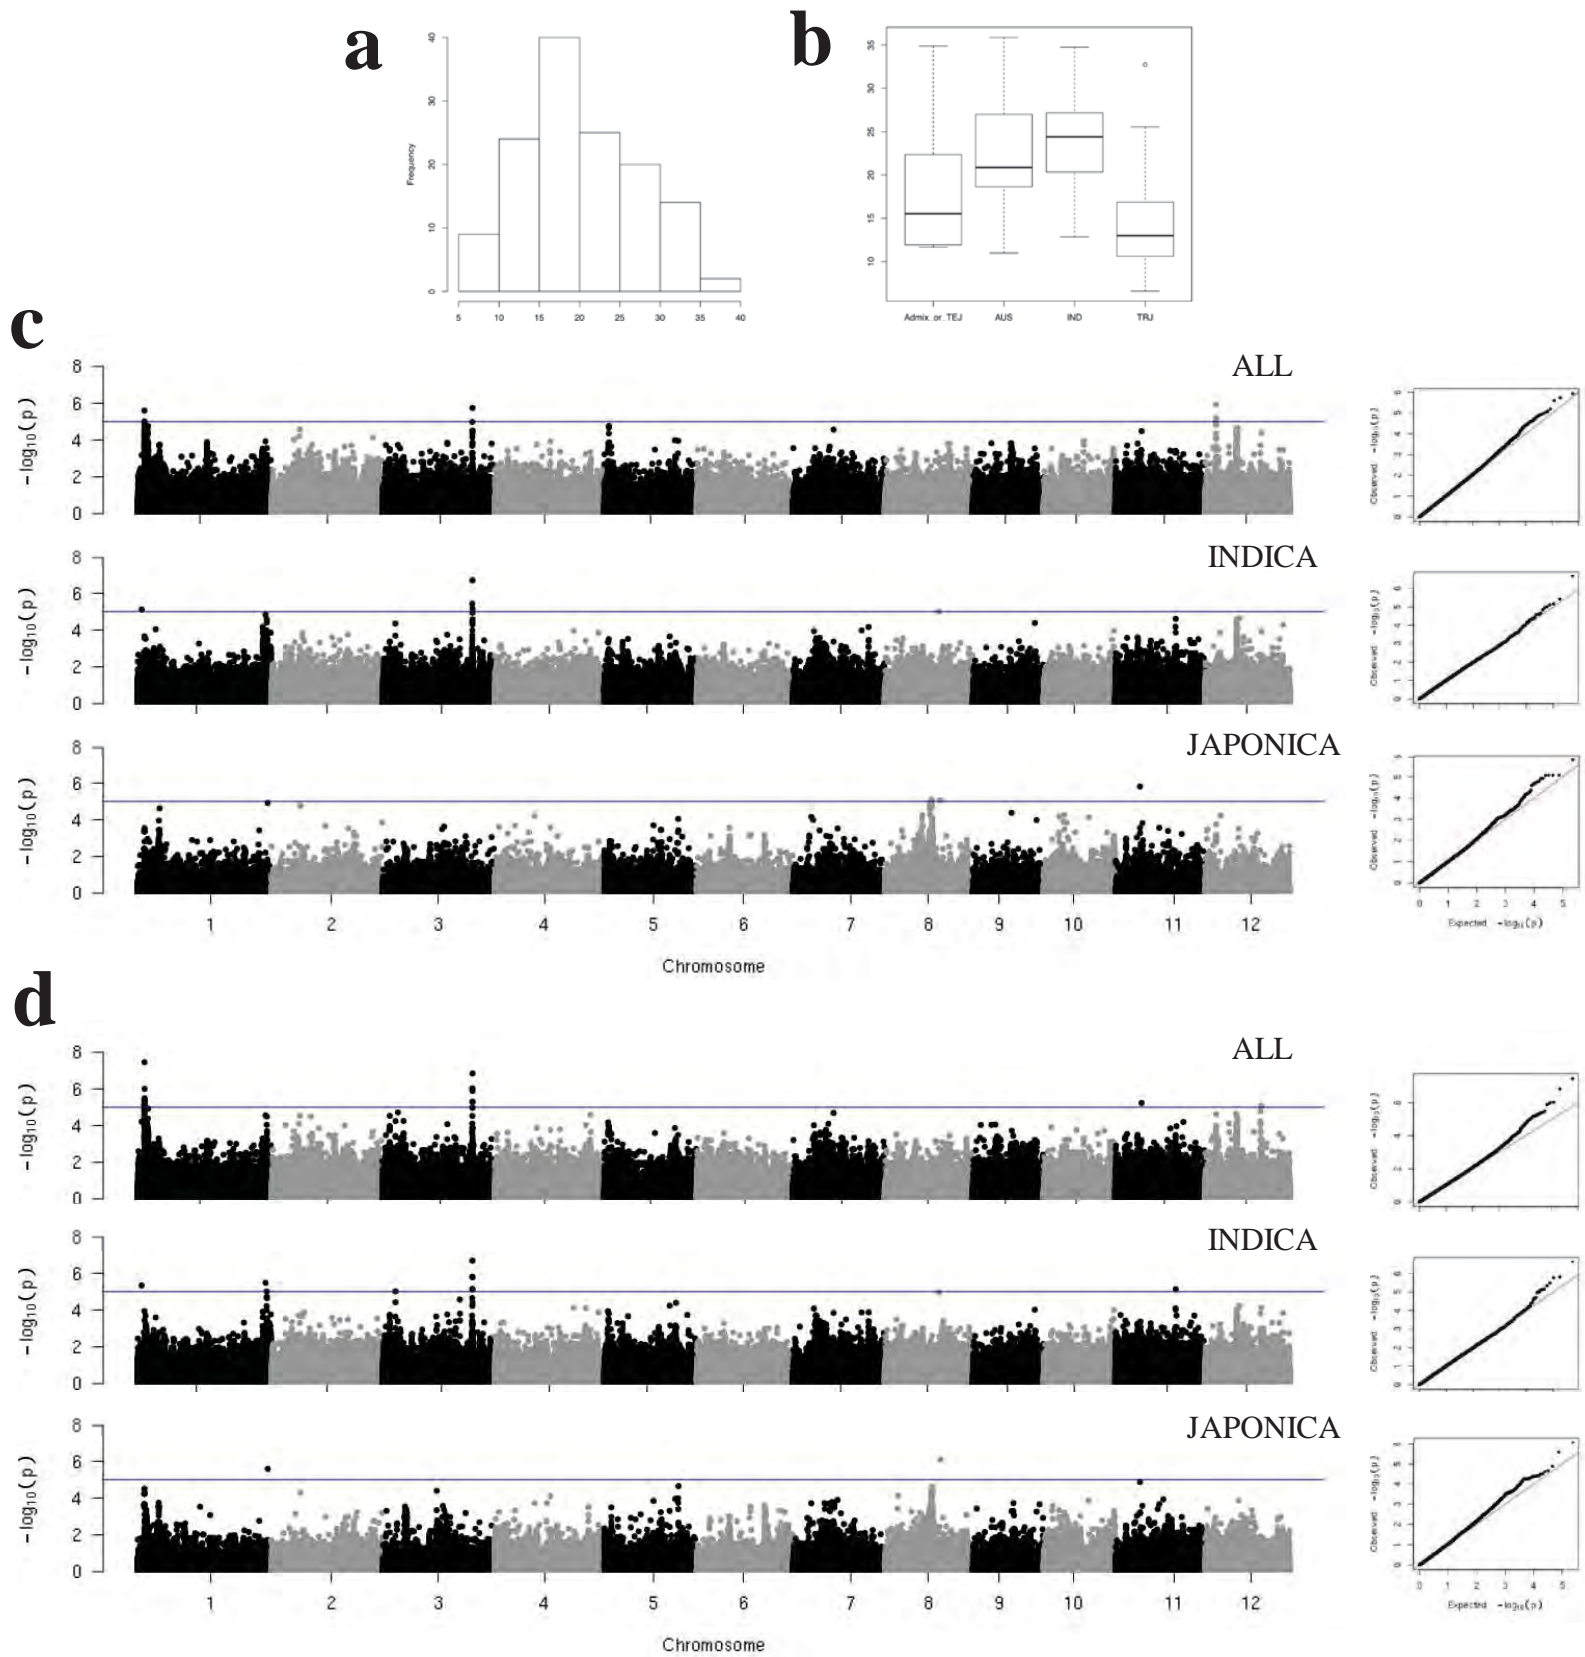

**Supplementary Figure 61. Summary of GWAS results for Panicle Number.** (a, b) Phenotypic distributions. (c) Mixed model controlling for subpopulation structure across all varieties (ALL) and within the two major varietal groups *Indica* (INDICA) and *Japonica* (JAPONICA). (d) Mixed model with heading date as a covariate.

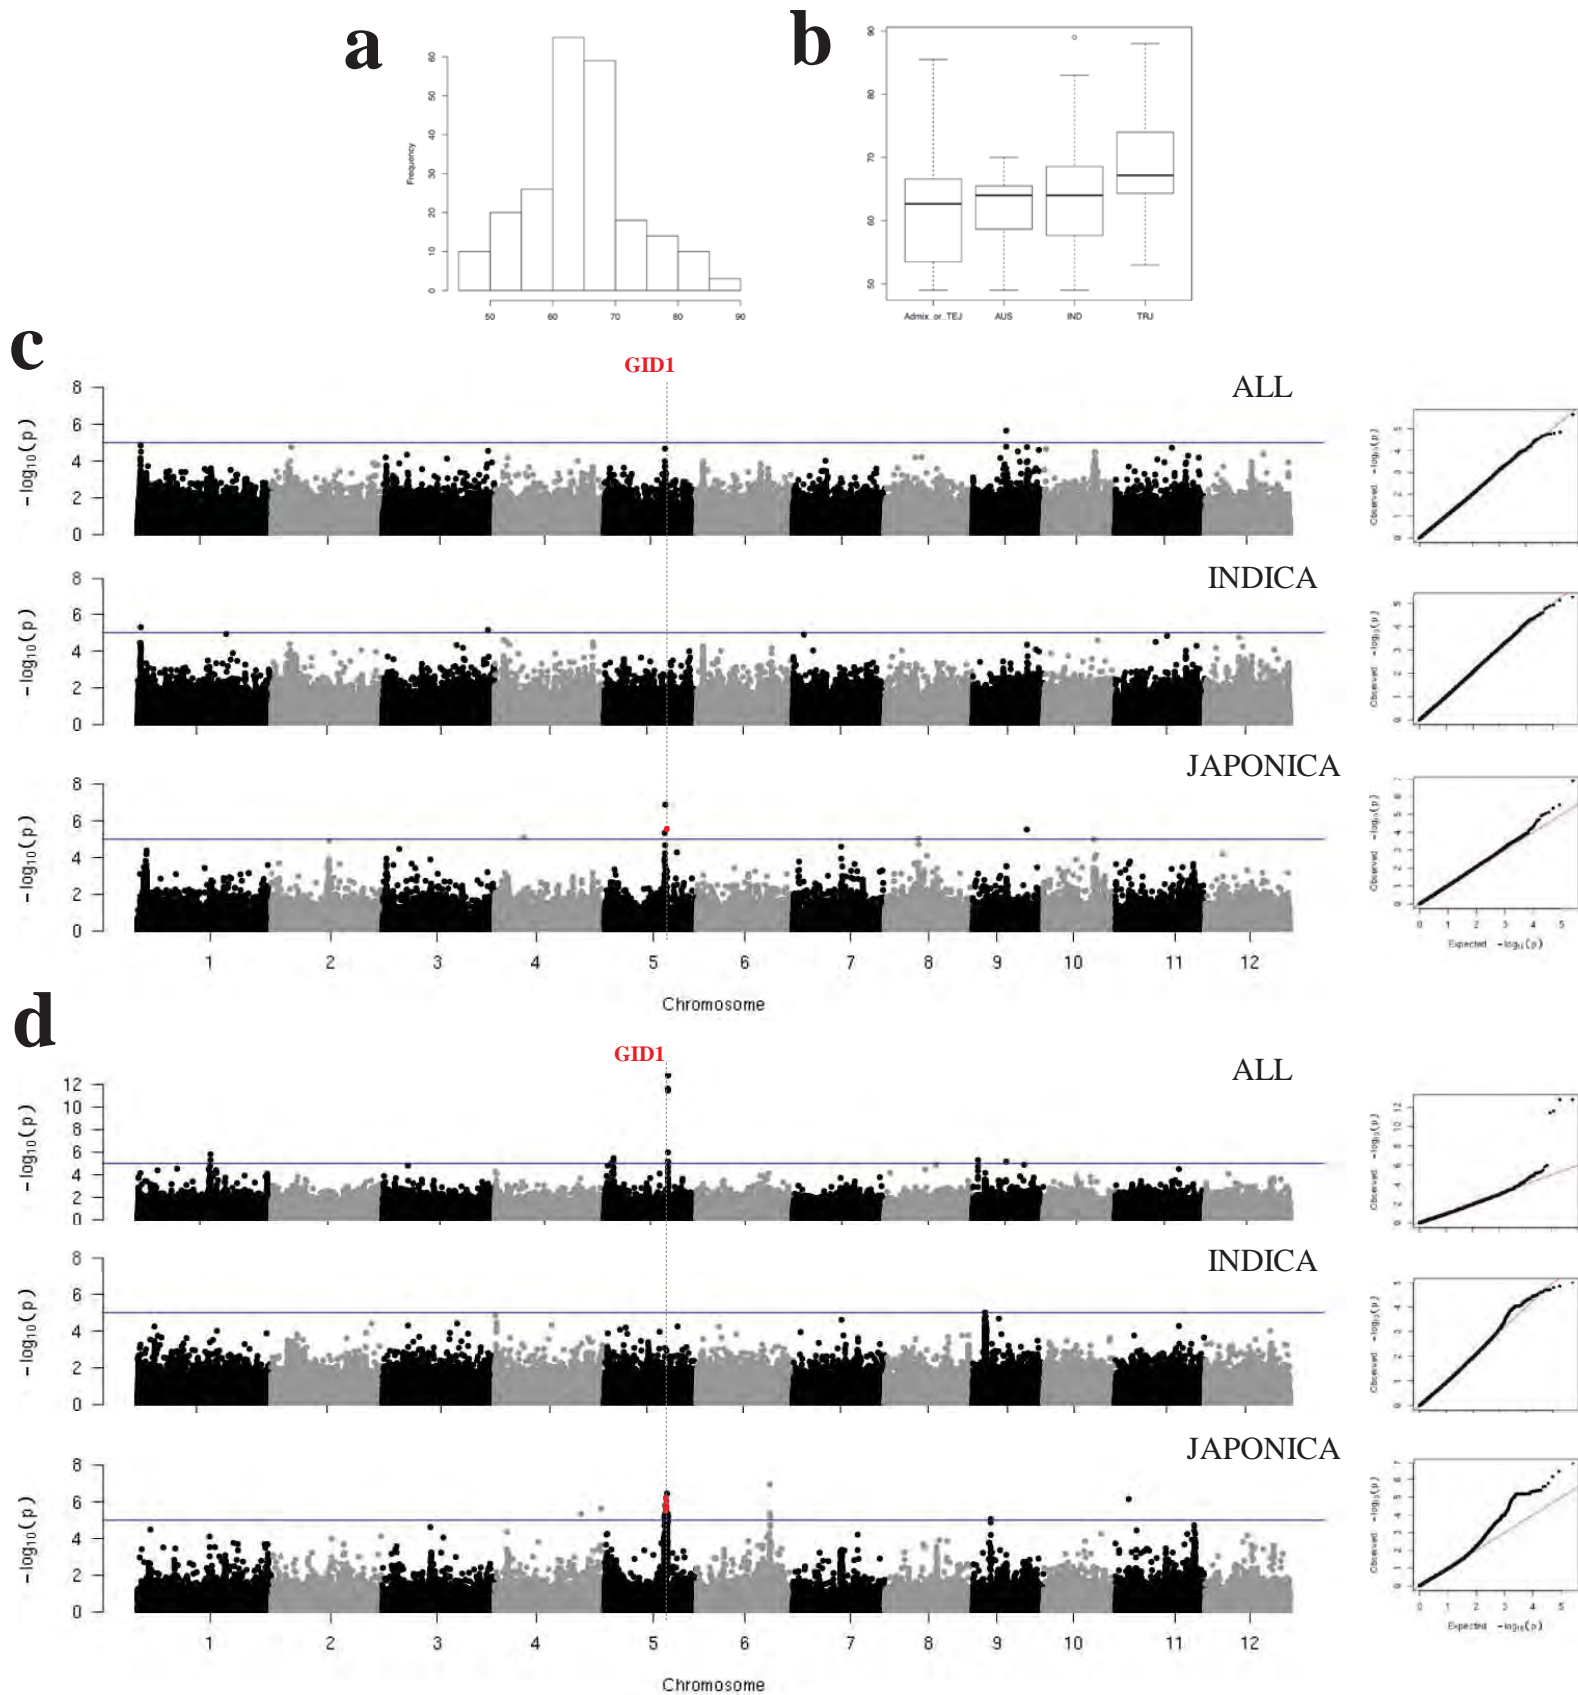

**Supplementary Figure 62. Summary of GWAS results for Booting Date (days after transplanting). (a, b)** Phenotypic distributions. **(c)** Mixed model controlling for subpopulation structure across all varieties (ALL) and within the two major varietal groups *Indica* (INDICA) and *Japonica* (JAPONICA). **(d)** Mixed model with heading date as a covariate.



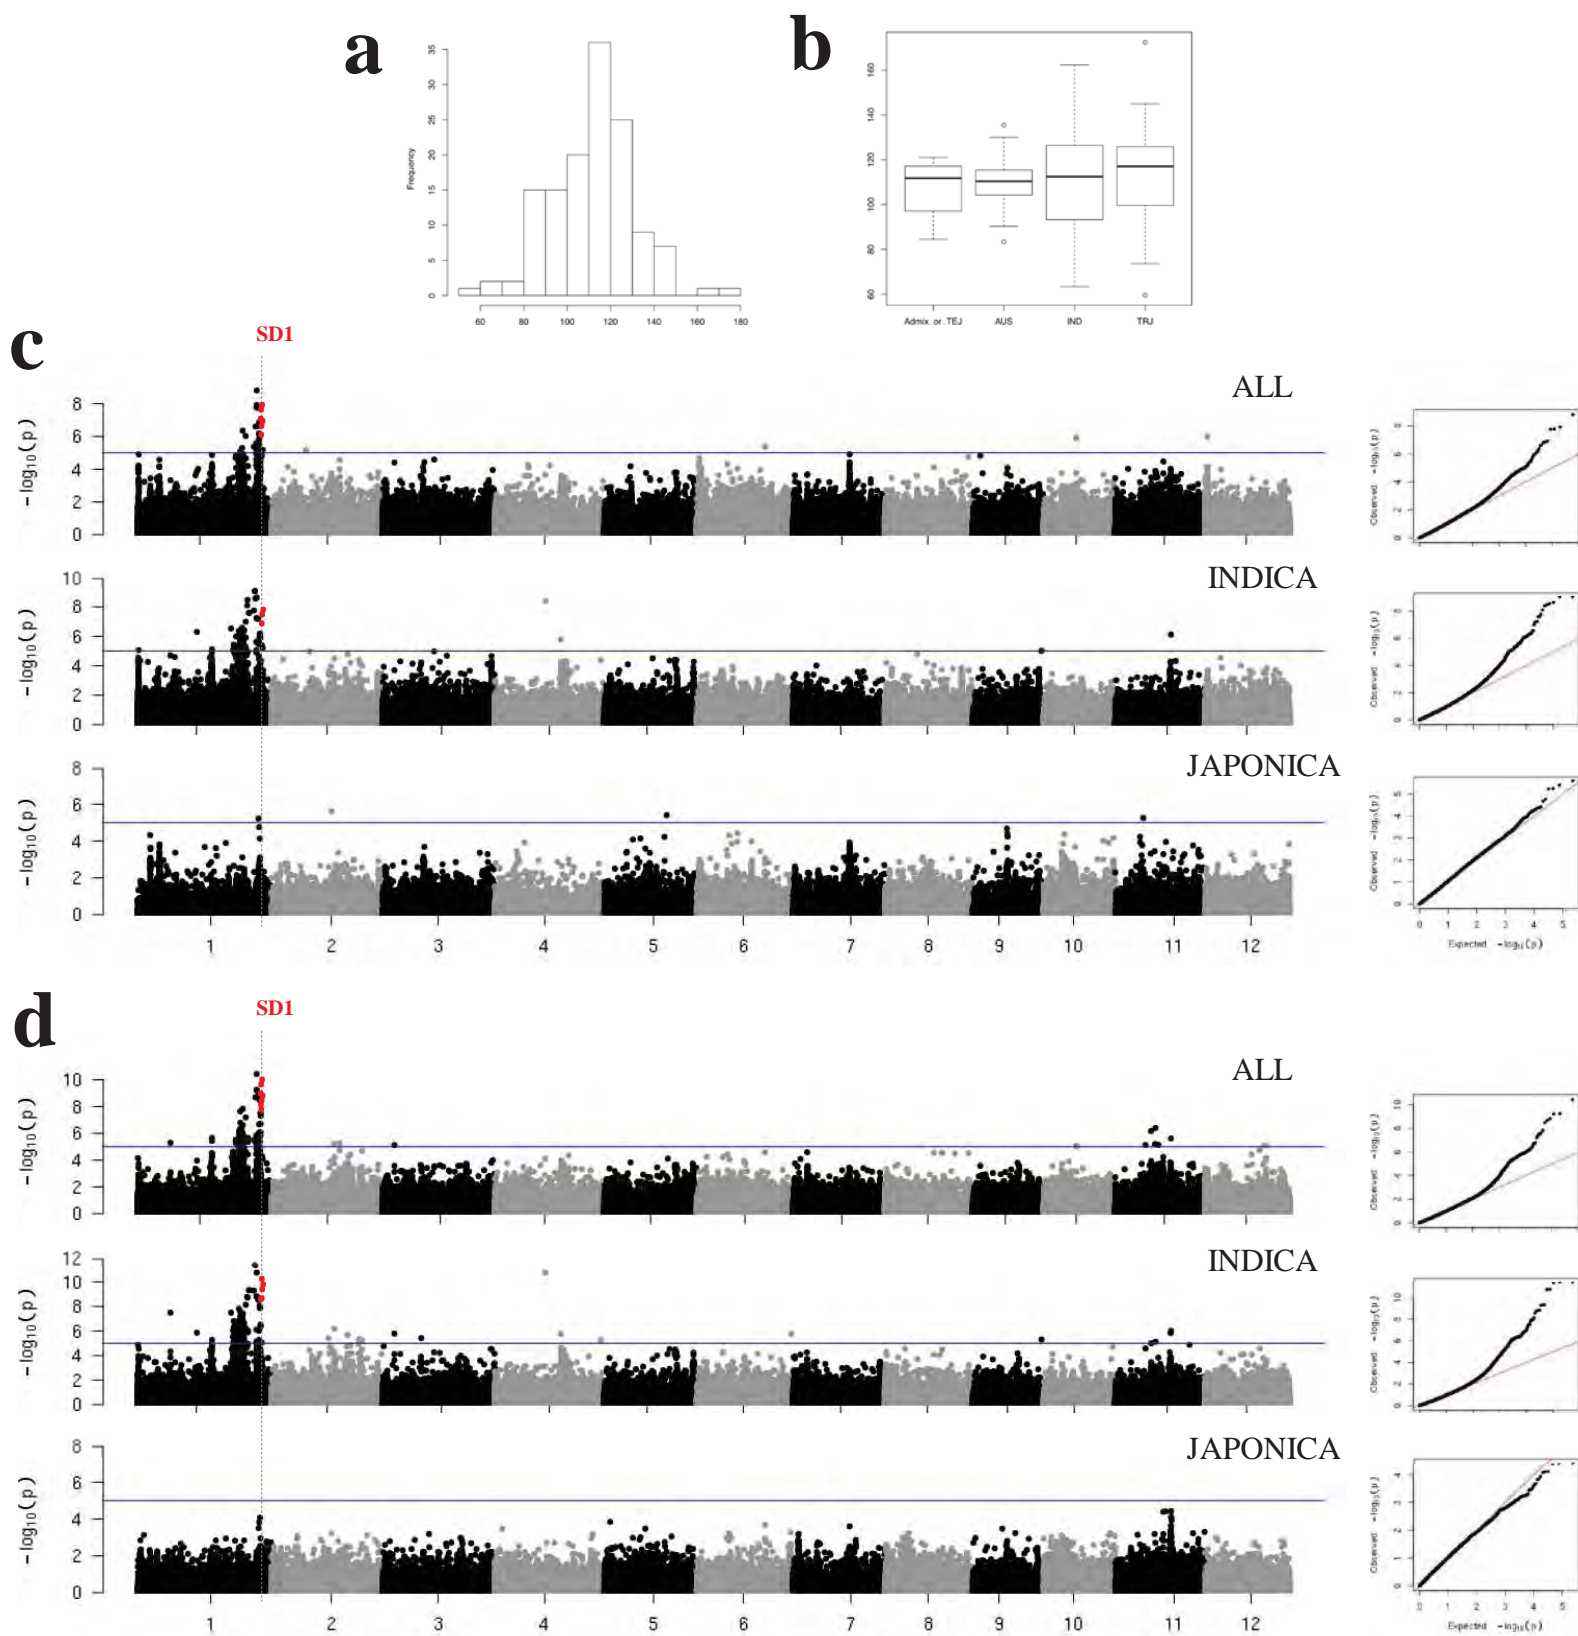

**Supplementary Figure 63. Summary of GWAS results for Plant Height (cm).** (a, b) Phenotypic distributions. (c) Mixed model controlling for subpopulation structure across all varieties (ALL) and within the two major varietal groups *Indica* (INDICA) and *Japonica* (JAPONICA). (d) Mixed model with heading date as a covariate.

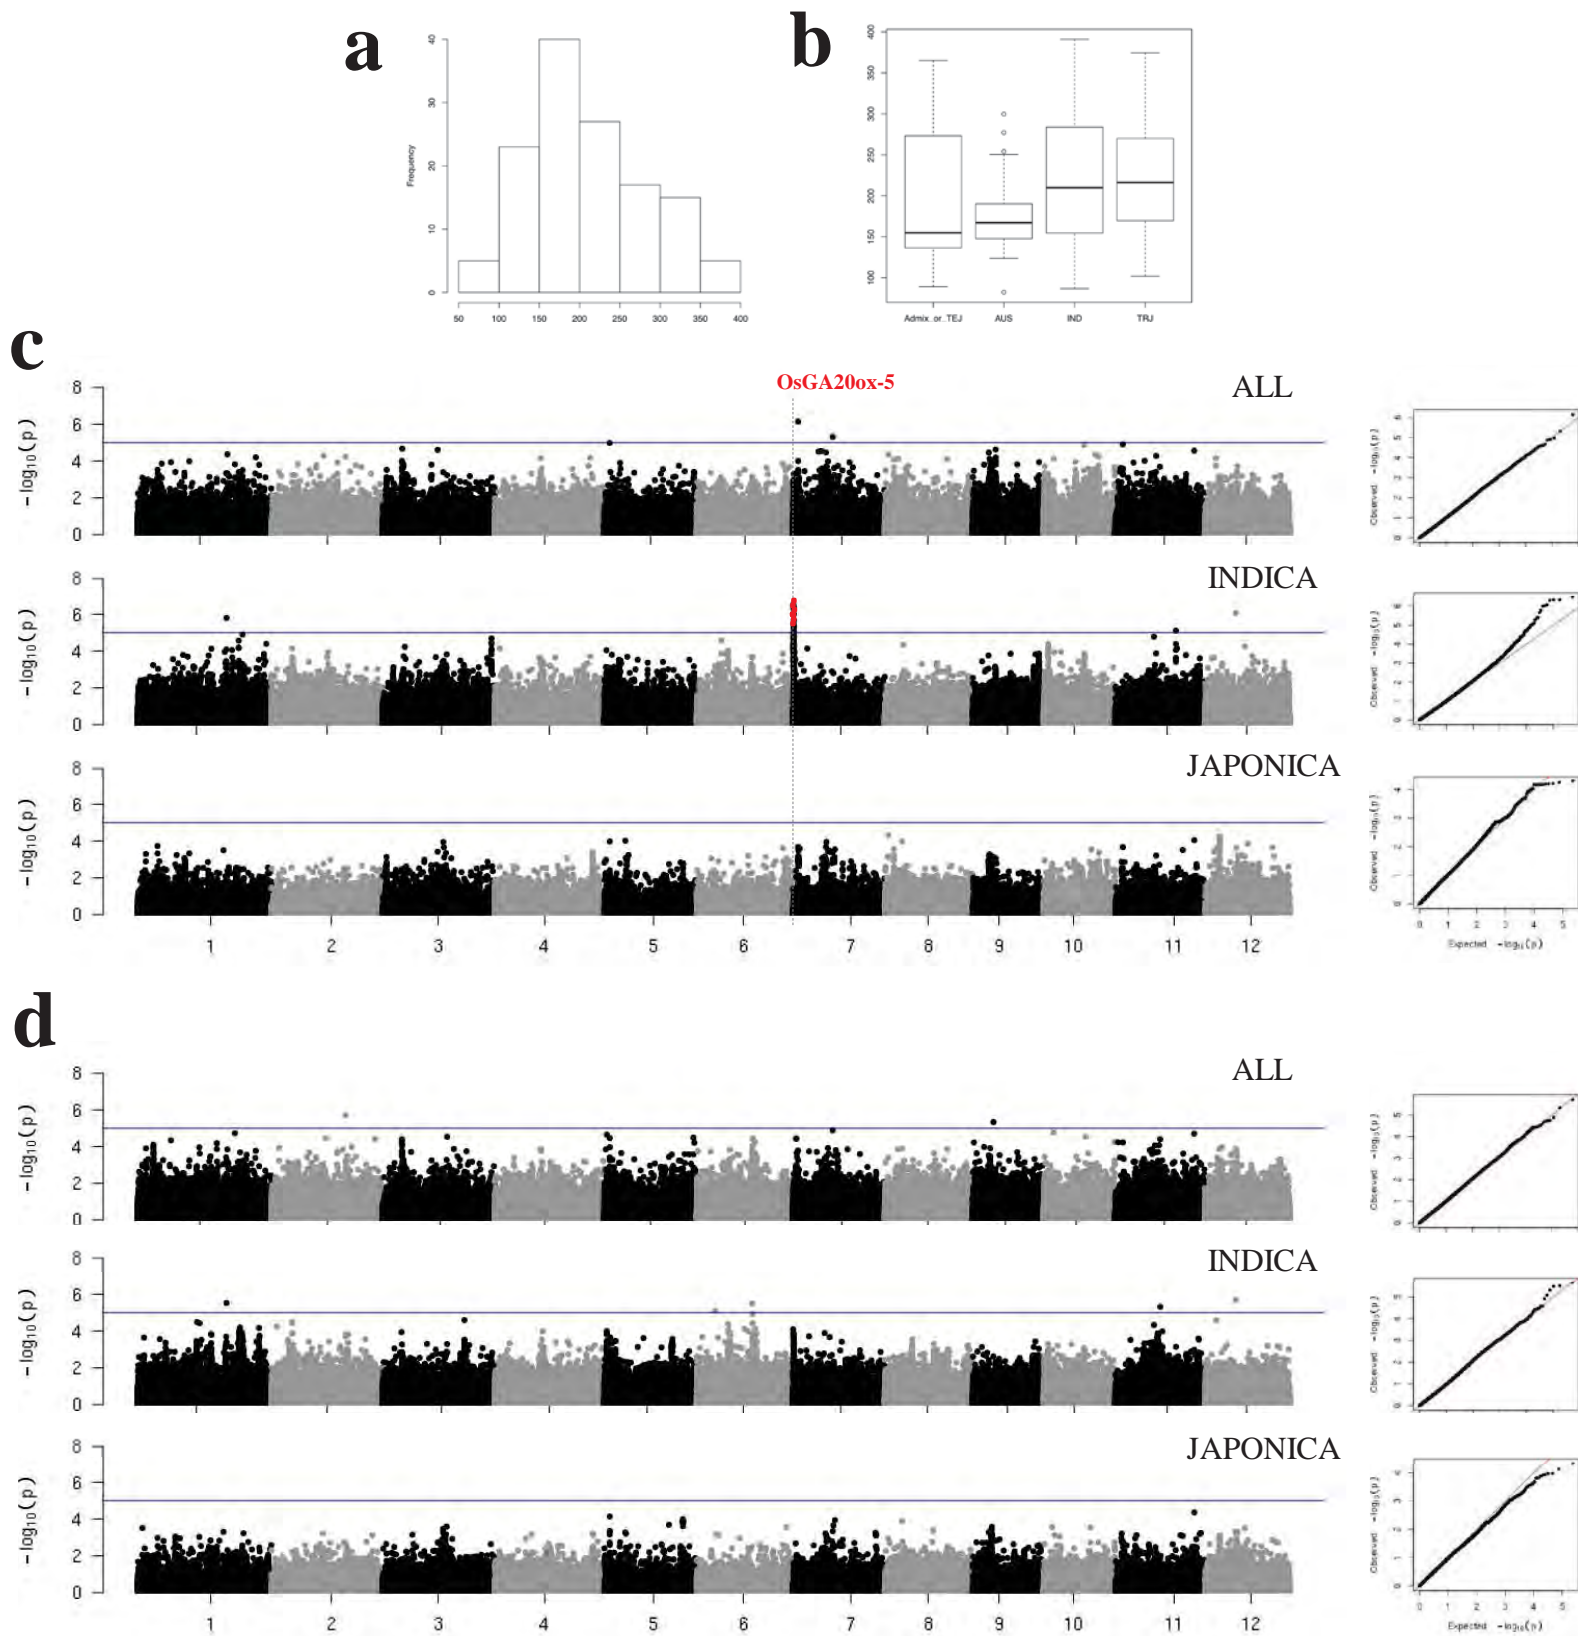

**Supplementary Figure 64. Summary of GWAS results for Total Vegetative Biomass (g).** (a, b) Phenotypic distributions. (c) Mixed model controlling for subpopulation structure across all varieties (ALL) and within the two major varietal groups *Indica* (INDICA) and *Japonica* (JAPONICA). (d) Mixed model with heading date as a covariate.

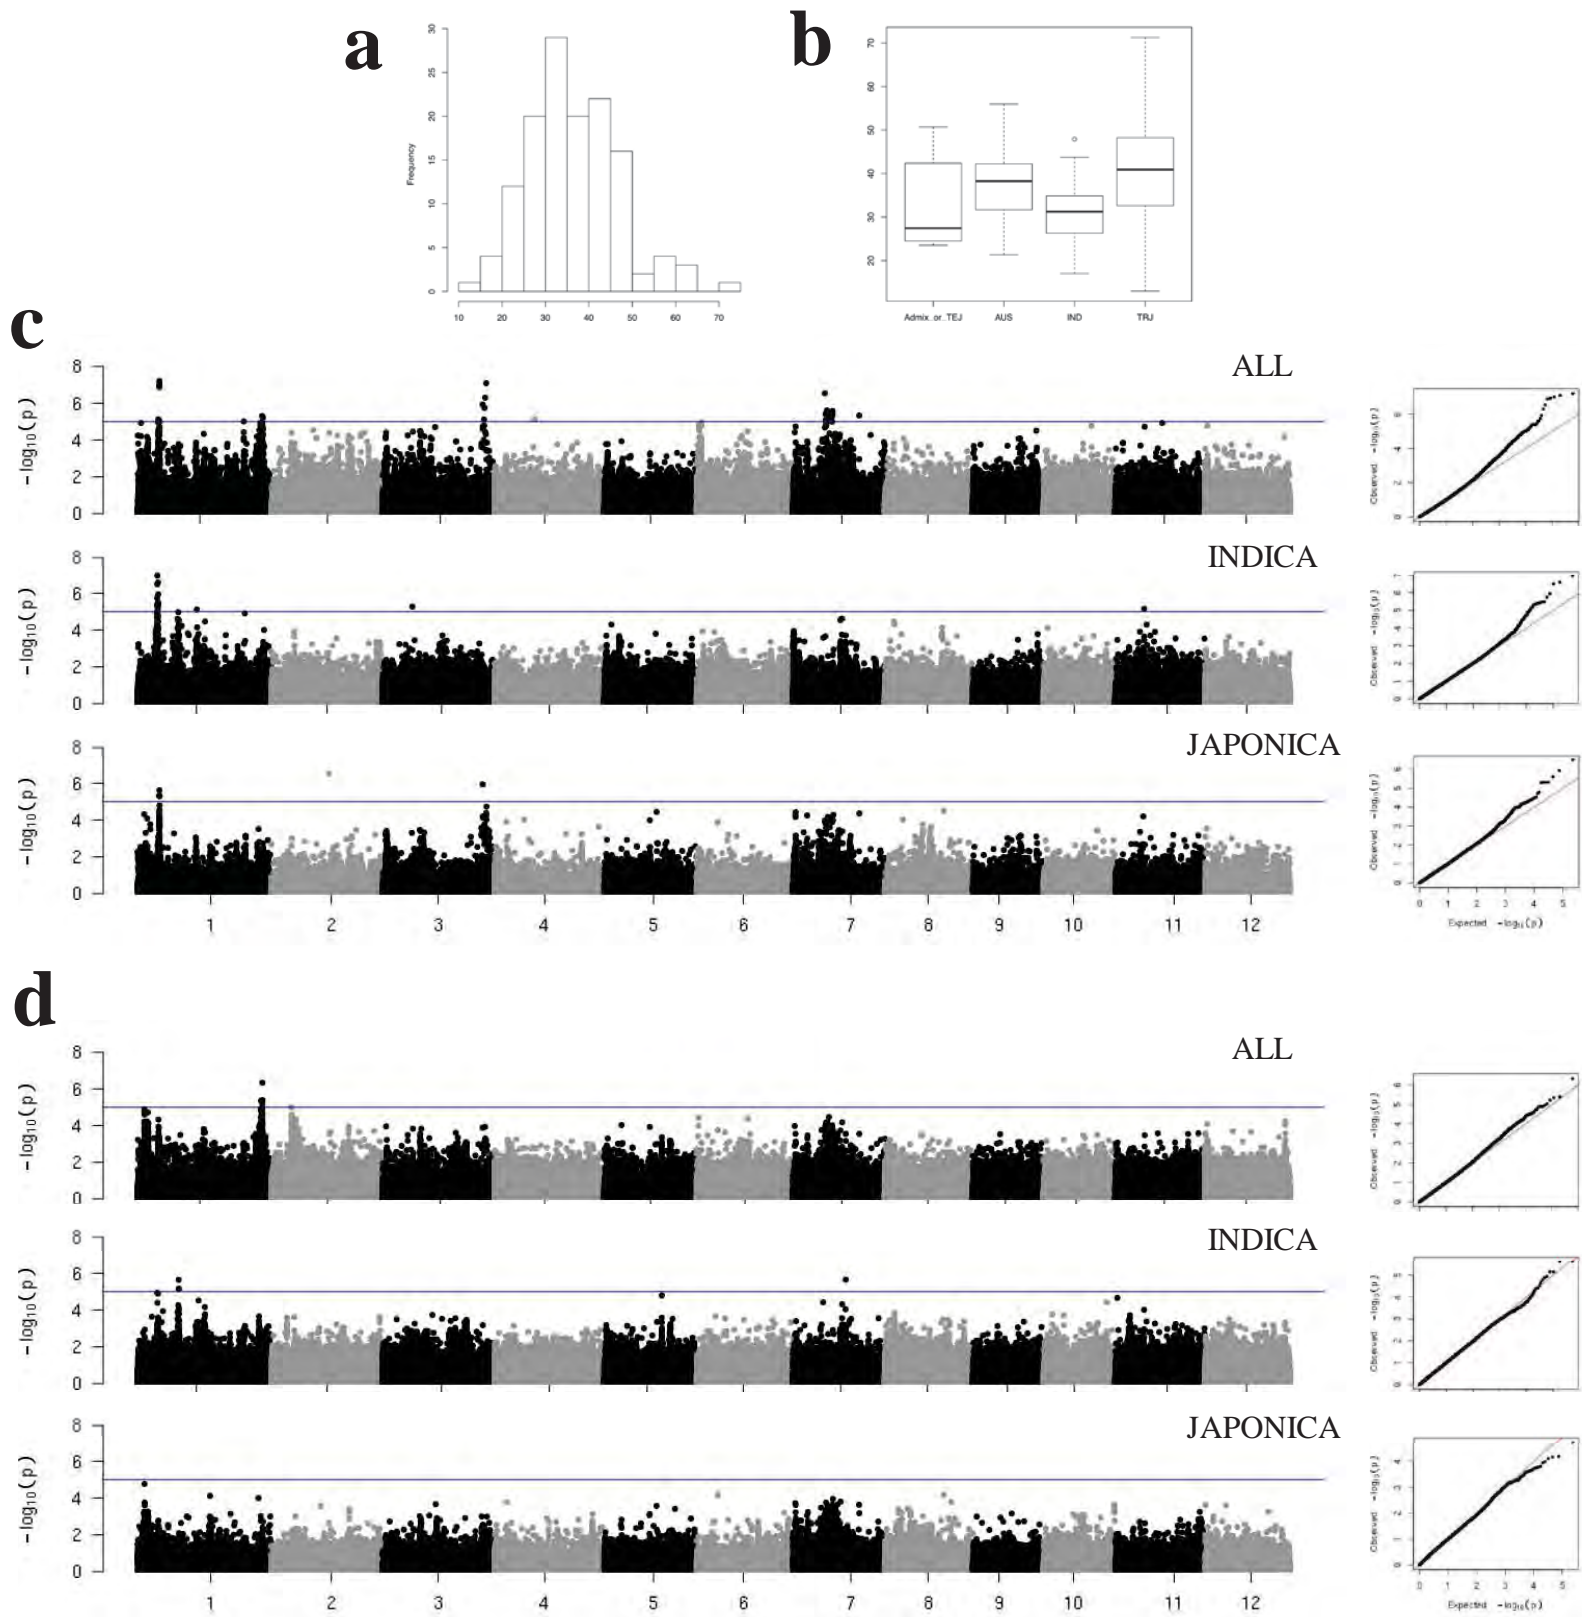

**Supplementary Figure 65. Summary of GWAS results for Flag Leaf Area (cm<sup>2</sup>).** (a, b) Phenotypic distributions. (c) Mixed model controlling for subpopulation structure across all varieties (ALL) and within the two major varietal groups *Indica* (INDICA) and *Japonica* (JAPONICA). (d) Mixed model with heading date as a covariate.



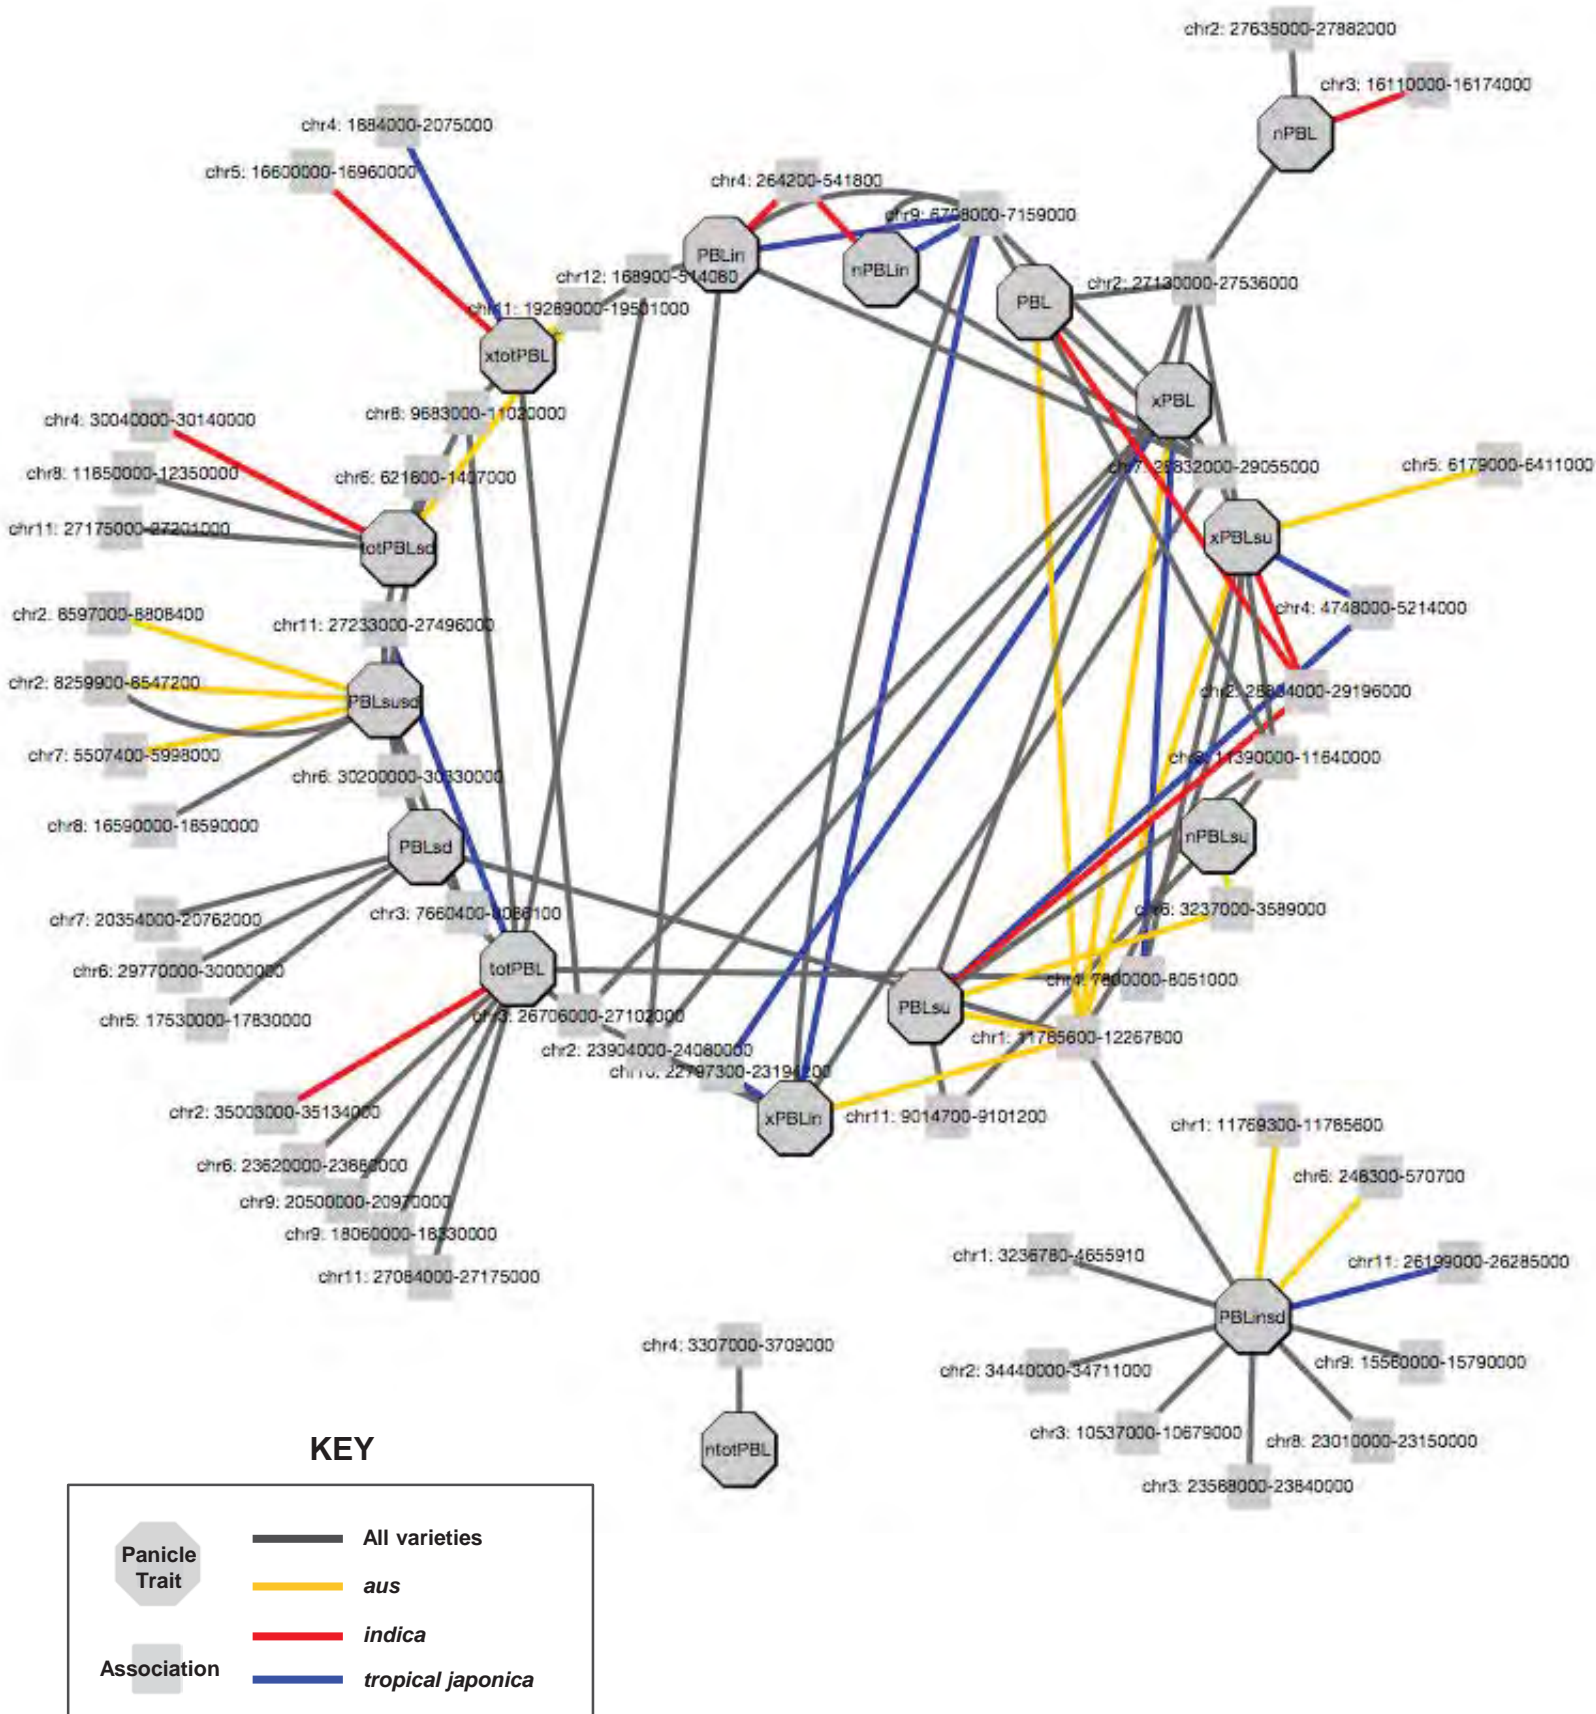

**Supplementary Figure 66. Association Network Summarizing GWAS results for Primary Branch length traits.** Primary branch length traits show an enrichment for subpopulation specific associations, when compared to primary branch number traits. Trait abbreviations can be found in Supplementary Table 2.

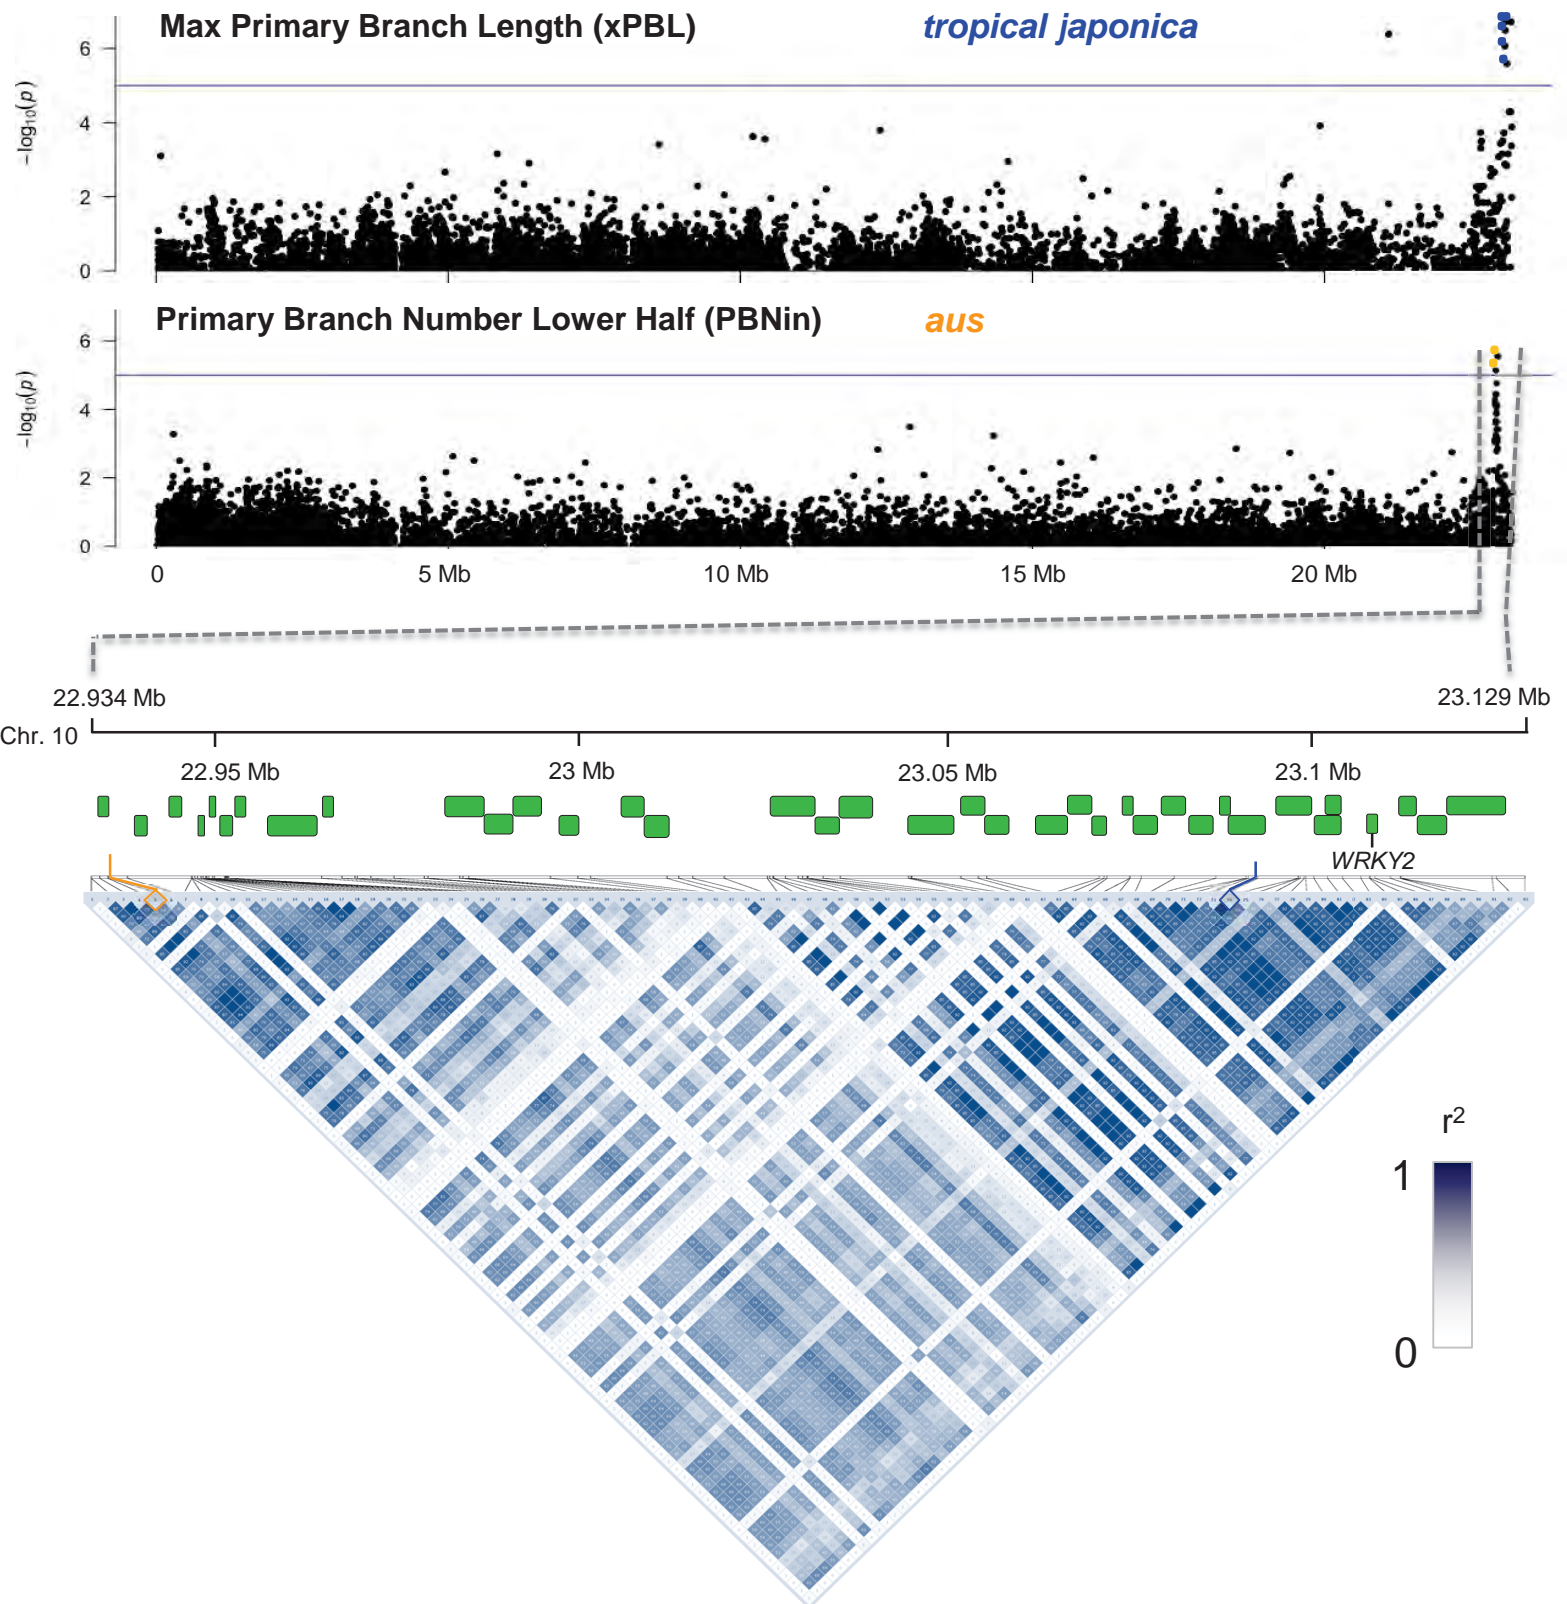

**Supplementary Figure 67. Overlapping subpopulation-specific panicle trait peaks.** Manhattan plots depicting significant associations for panicle traits in two subpopulations on the distal end of chromosome 10: maximum primary branch length (*tropical japonica* panel), and primary branch number in the lower half of the panicle (*aus* panel). The x-axis depicts the physical location of SNPs across chromosome 10, and the y-axis depicts the  $-\log_{10}(P)$  value. Significant SNPs ( $P < 1 \times 10^{-5}$ ) are depicted as colored dots, labeled to match the group in which they were identified: *tropical japonica* (blue) and *aus* (yellow). The zoom-in plot depicts ~195kb region (grey dotted lines), with gene models in green. The heatmap depicts linkage disequilibrium (LD), measured as  $r^2$ , between SNPs calculated using *aus* varieties. The most significant SNP for the *aus* and *tropical japonica* peaks are labeled in yellow and blue. The candidate gene, *WRKY2*, is located ~30kb of the peak SNP for the maximum primary branch length. These two peaks were the only peaks for panicle traits that are in an LD block and were identified in two separate subpopulations.





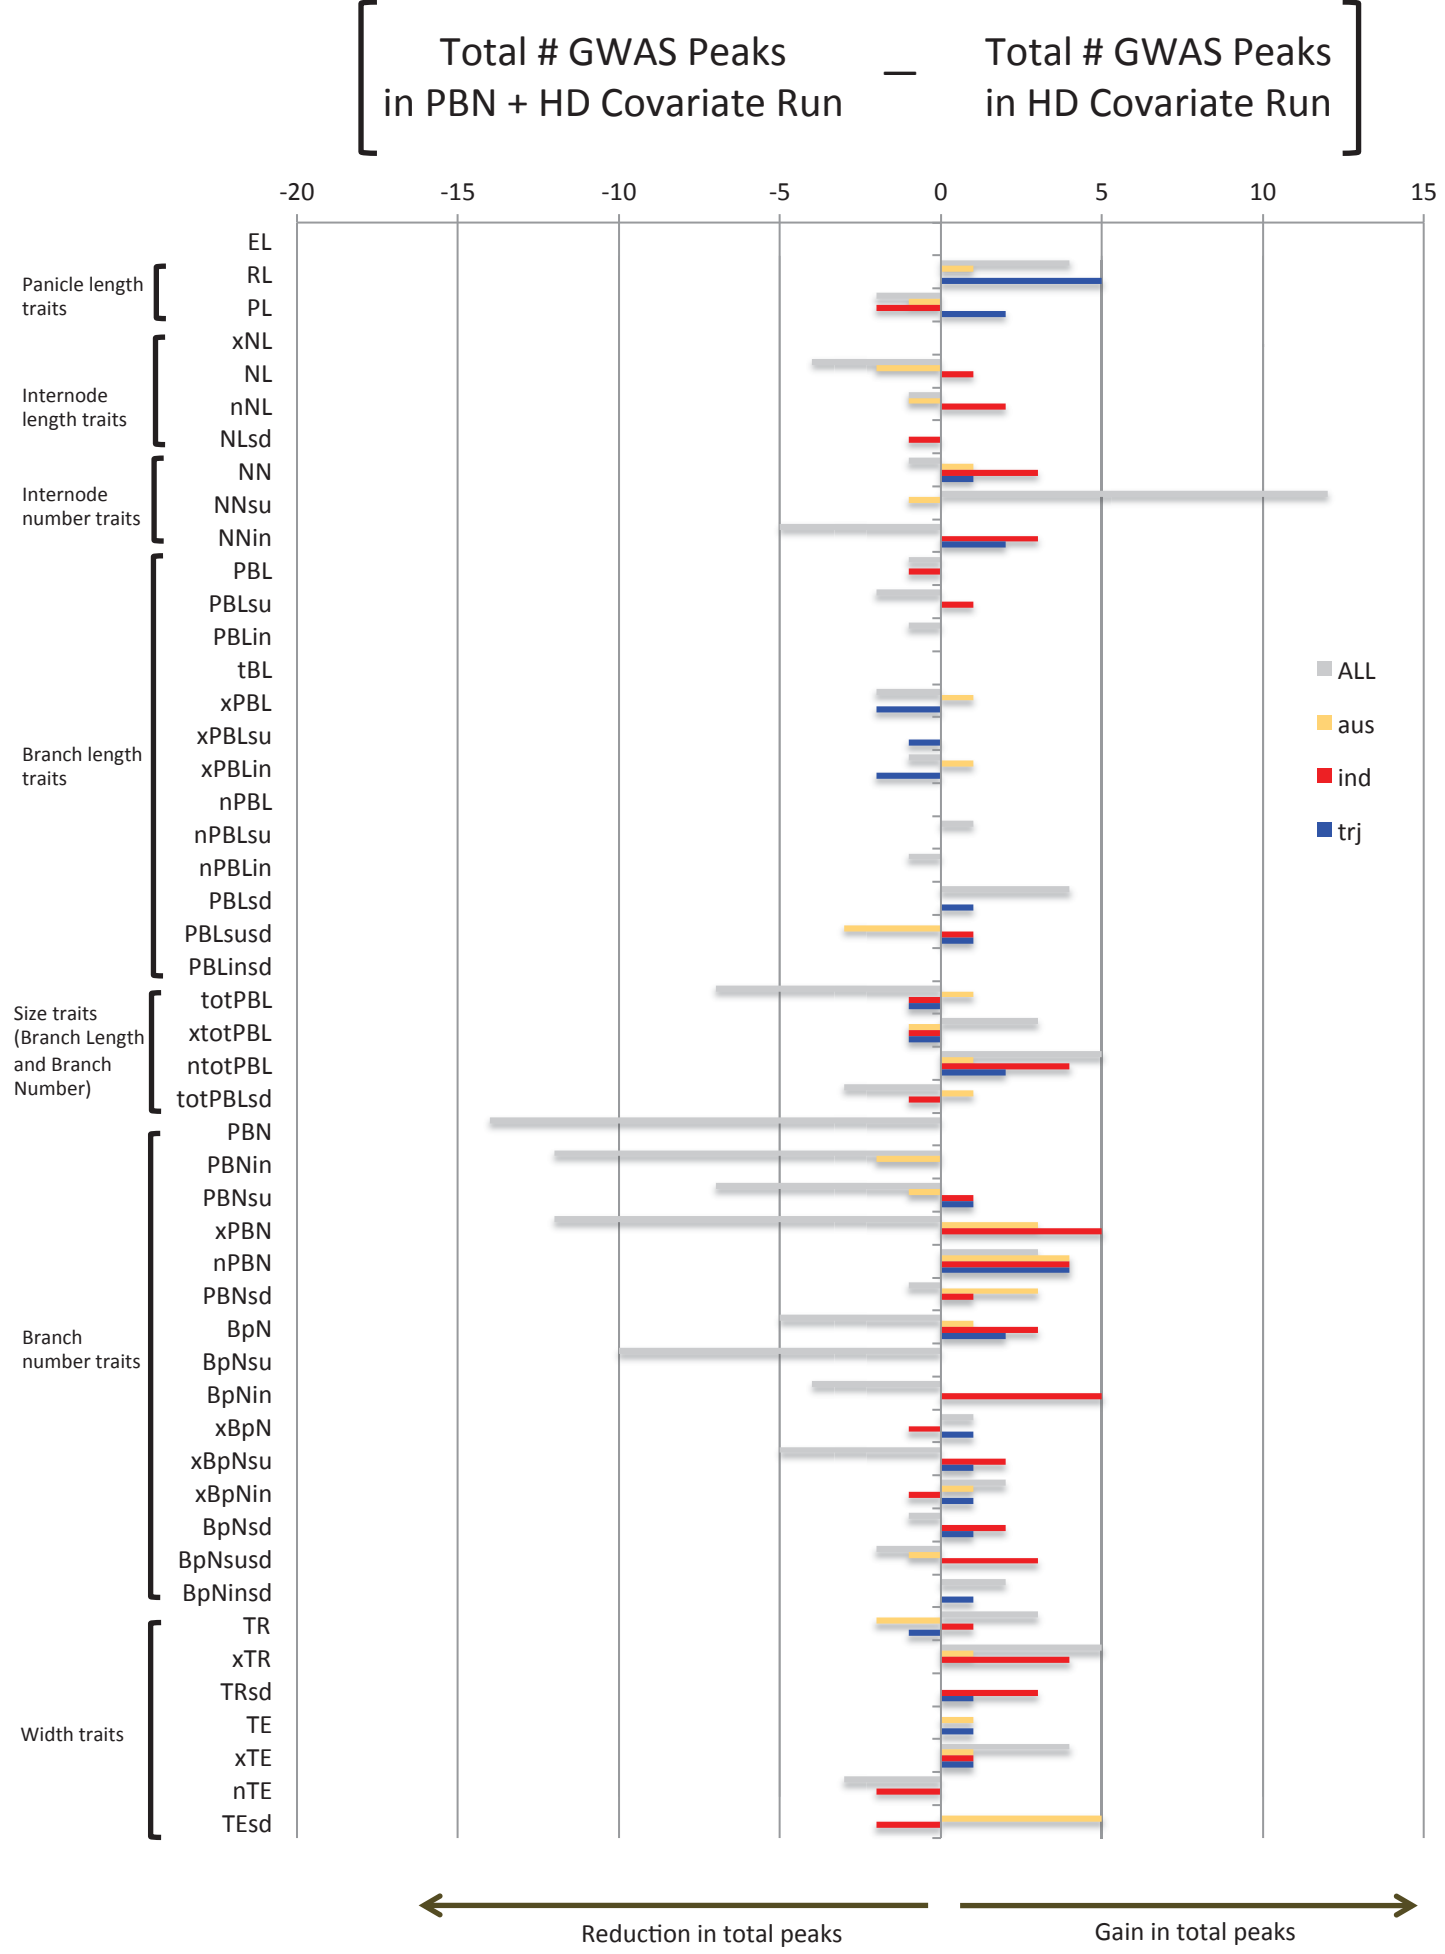

**Supplementary Figure 69. PBN covariate impacts GWAS peaks.** Bar graph depicts the difference between the total number of GWAS peaks, identified in the mixed model incorporating primary branch number (PBN) as a covariate vs. the mixed model only containing the heading date (HD) covariate.

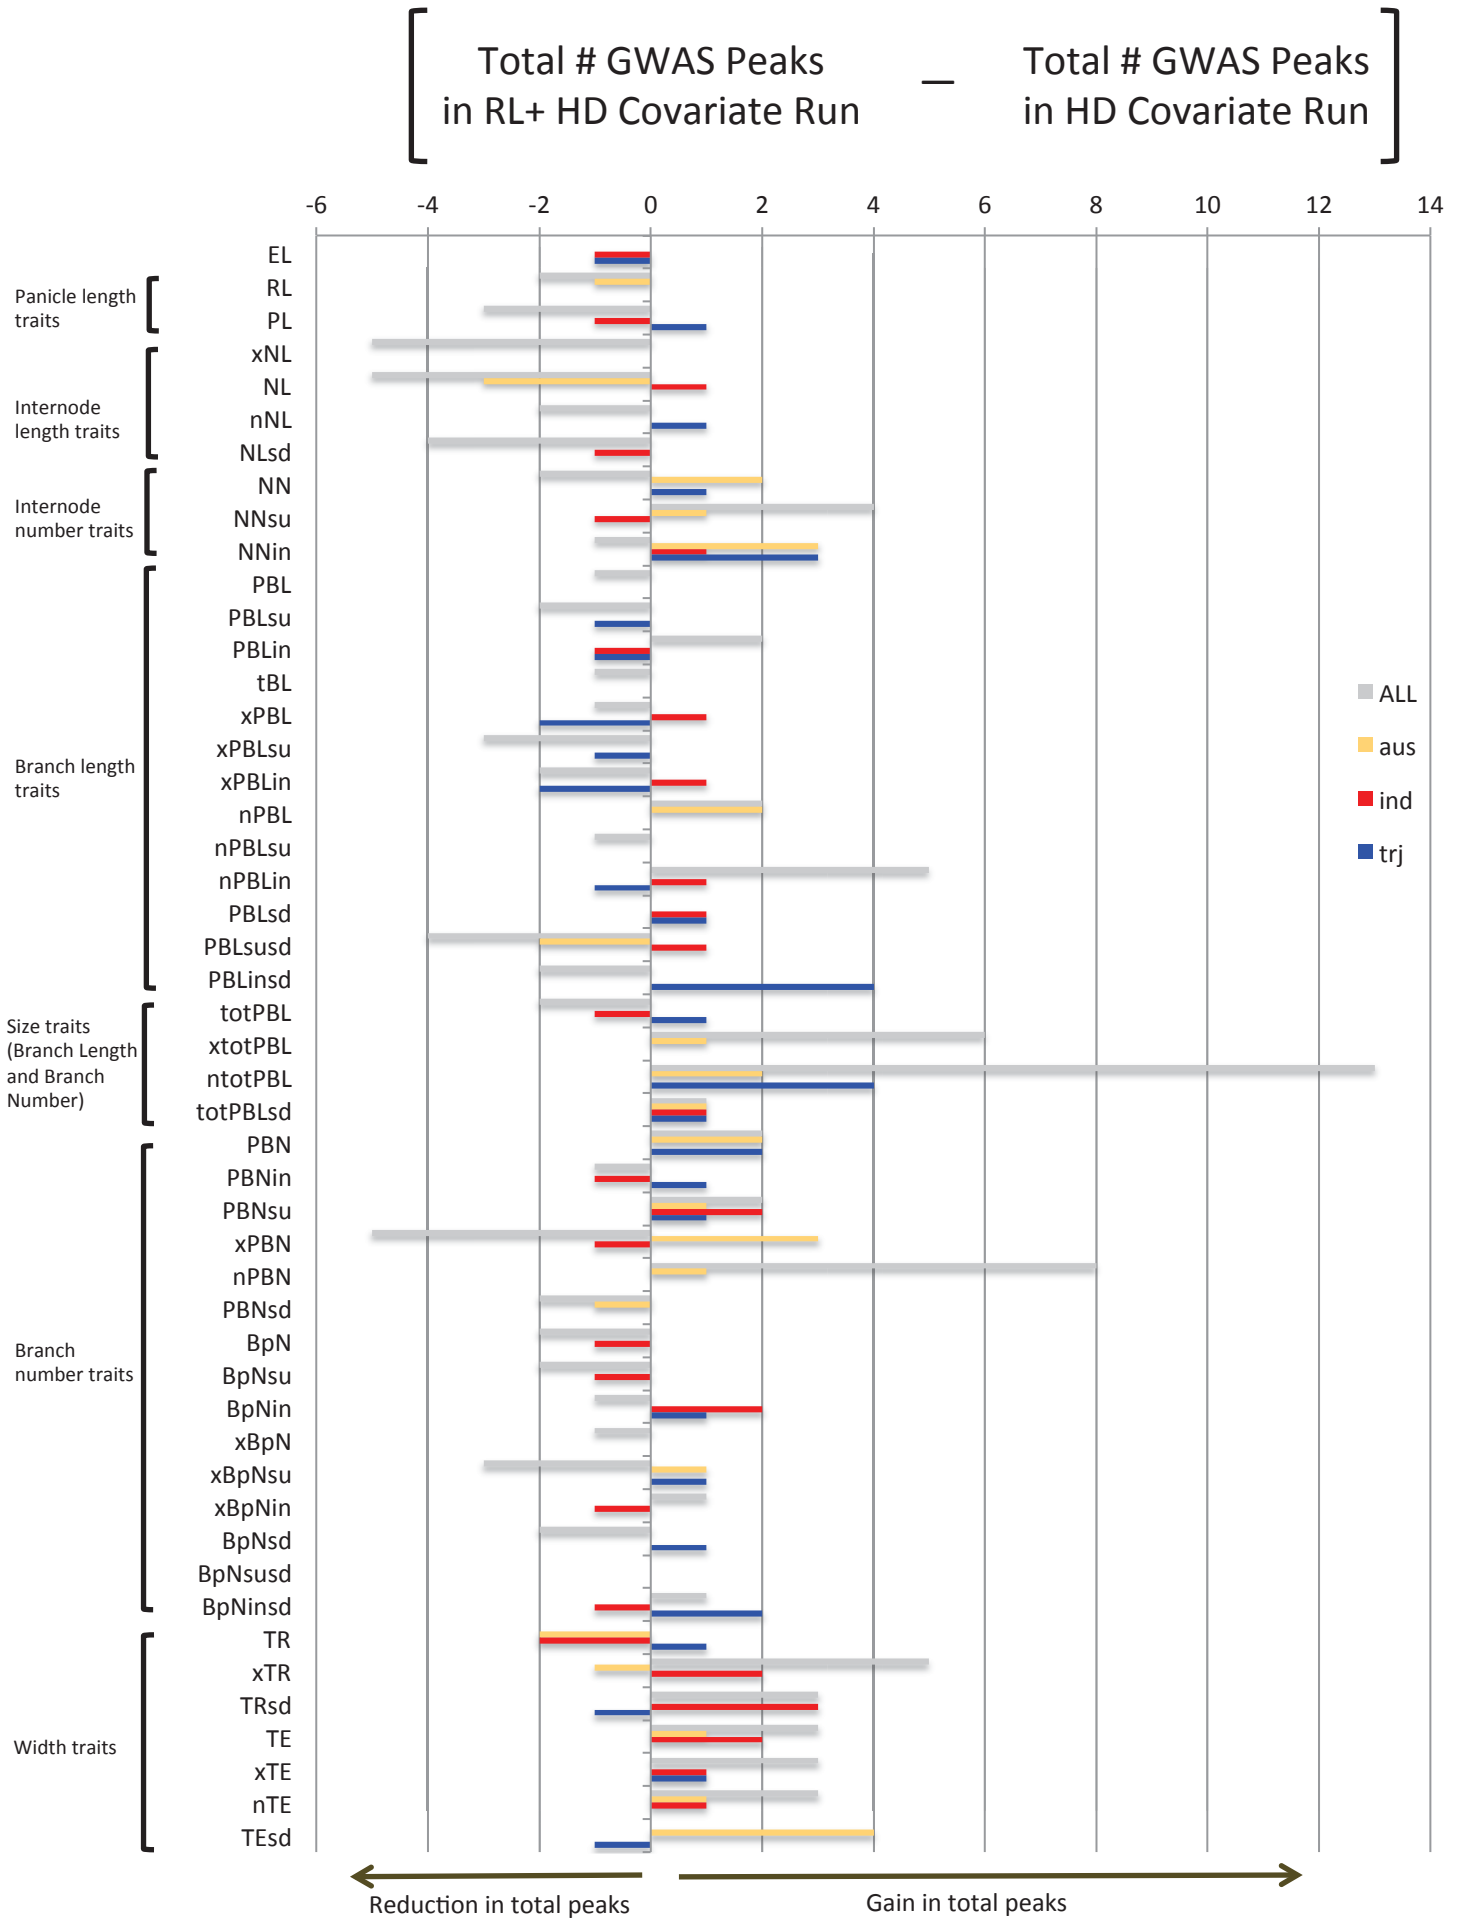

**Supplementary Figure 70. RL covariate impacts GWAS peaks.** Bar graph depicts the difference between the total number of GWAS peaks, identified in the mixed model incorporating rachis length (RL) as a covariate vs. the mixed model only containing the heading date (HD) covariate.

Total # GWAS Peaks  
in NL + HD Covariate Run

Total # GWAS Peaks  
in HD Covariate Run

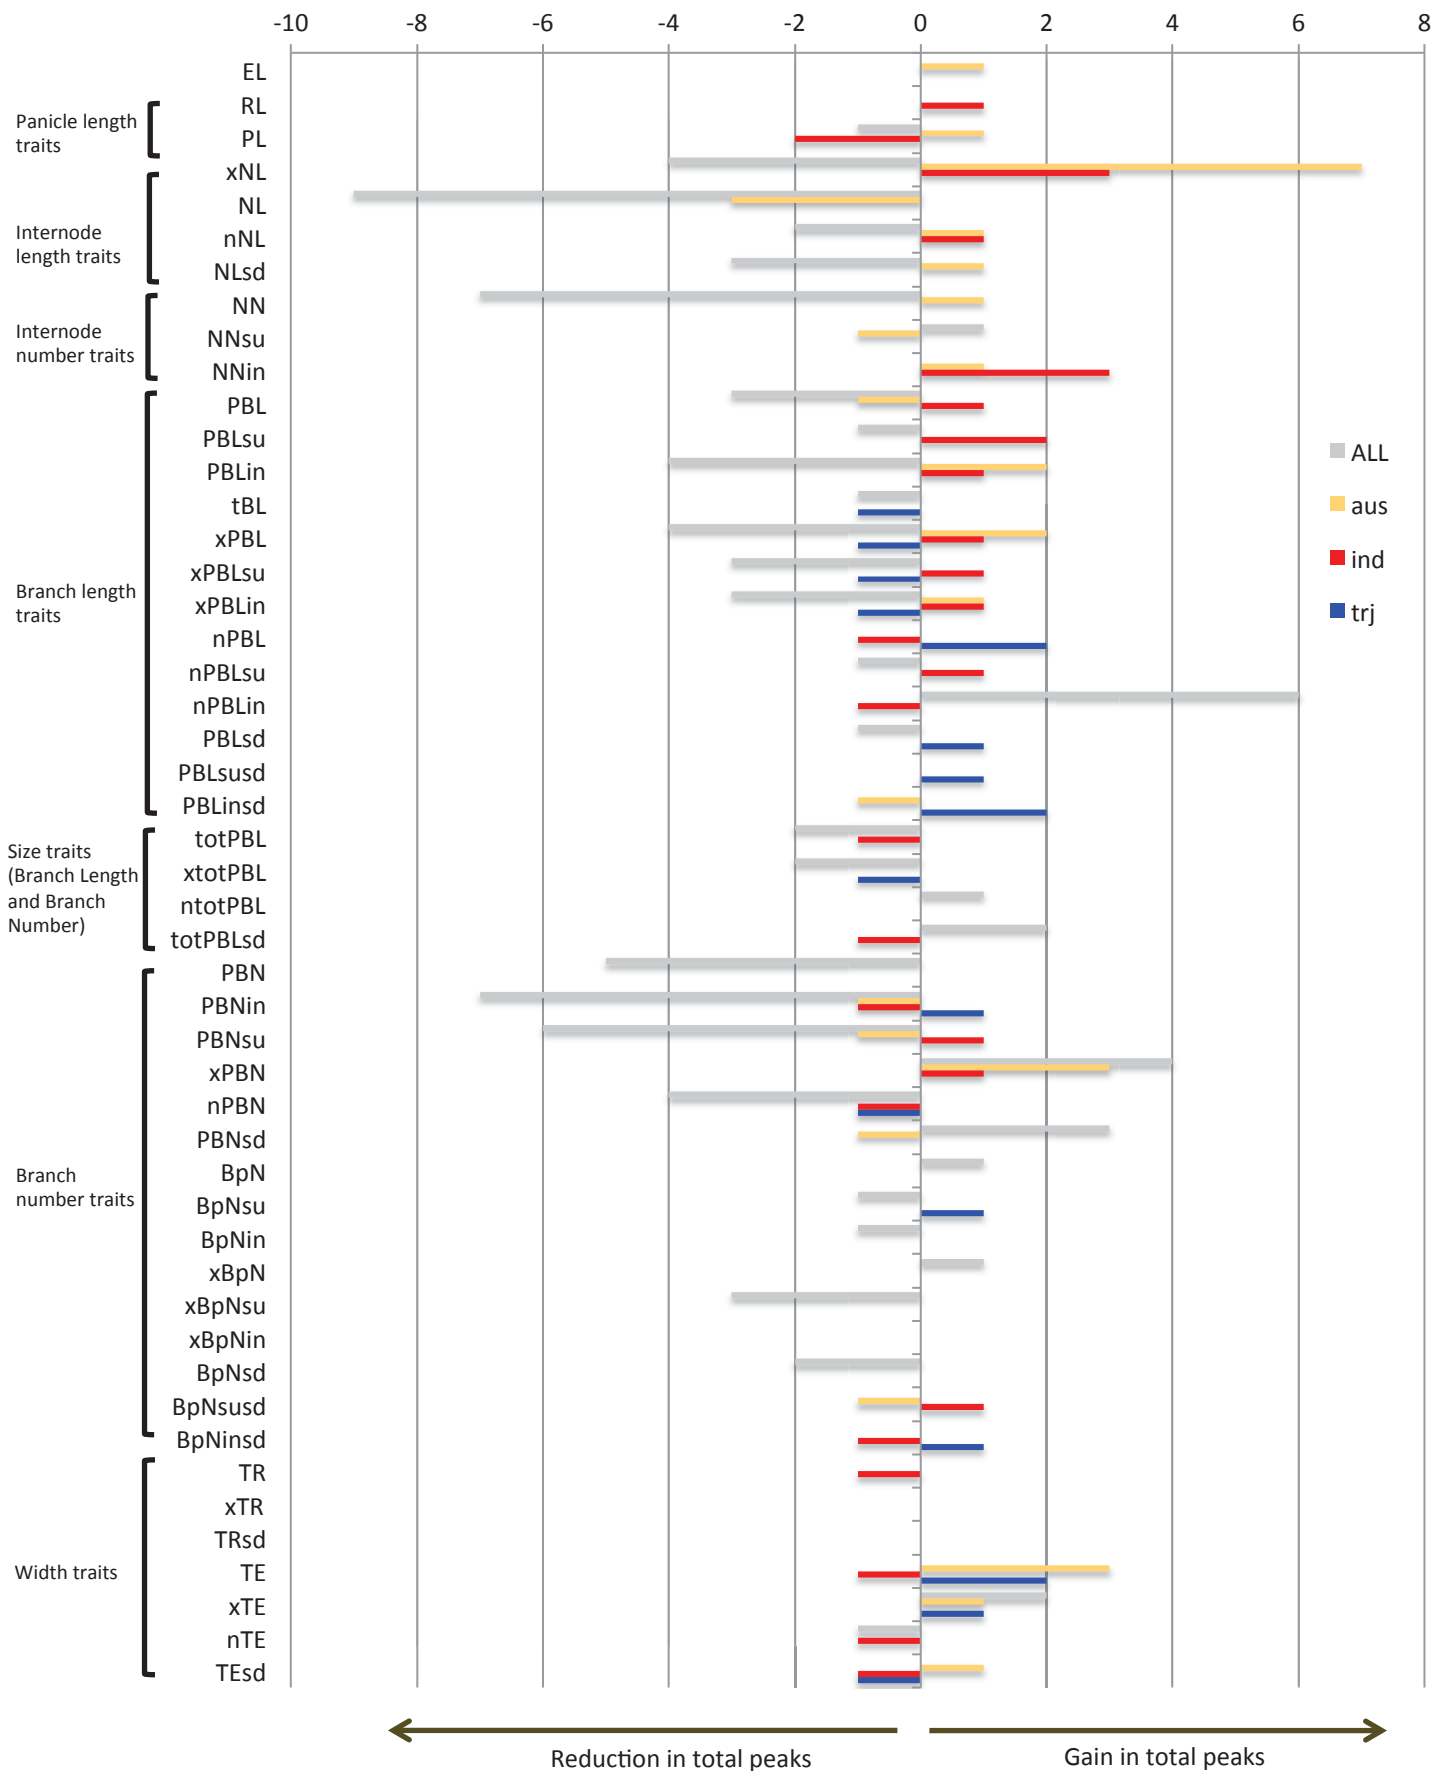

**Supplementary Figure 71. NL covariate impacts GWAS peaks.** Bar graph depicts the difference between the total number of GWAS peaks, identified in the mixed model incorporating internode length (RL) as a covariate vs. the mixed model only containing the heading date (HD) covariate.



**Supplementary Figure 72. Panicle trait covariates and yield associations.** Peaks detected using (a) the heading date (HD) covariate within the GWAS mixed model; (b) HD and primary branch length (PBL) covariate; (c) HD and primary branch number (PBN) covariate; (d) HD and rachis length (RL) covariate; or (e) HD and internode length (NL) covariate. Association networks where traits and linkage disequilibrium (LD) blocks containing significant SNPs ( $P < 1 \times 10^{-5}$ ) are treated as nodes, and are connected if an LD block contains a significant association for the trait of interest. LD blocks are labeled with chromosome number and coordinates. The color and style of the edges connecting the trait and associations indicate the subpopulation or subspecies in which the association was detected. When multiple edges are present between a trait and LD block, a significant association was detected in more than one GWAS. To simplify networks, acronyms are used. Count traits: primary branch number (PBN), internode number (NN), and number of branches per internode (BpN). Length traits: panicle length (PL), rachis length (RL), primary branch length (PBL), and internode length (NL). Width traits: thickness of rachis (TR) and thickness of exertion (TE). In addition to overall trait averages, sub-traits are depicted using acronyms with prefixes and/or suffixes: maximum (x-), minimum (n-), standard deviation (-sd), inferior (-in), and superior (-su). For example, maximum primary branch length in the inferior half of the panicle (xPBLin). Agronomic traits: booting (BT), total shoot biomass (totBM), flag leaf area (FLA), panicle weight (PW), grain number (GN), 1000-grain weight (1000GW), and panicle number (PN).

**a**

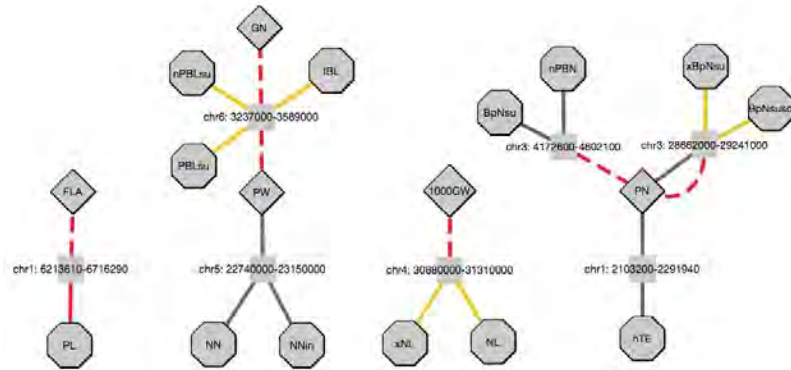

HD + PBL Covariates

**b**

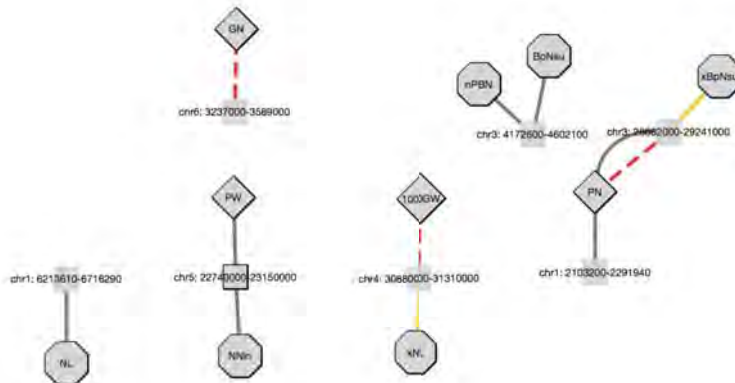

HD + PBN Covariates

**c**

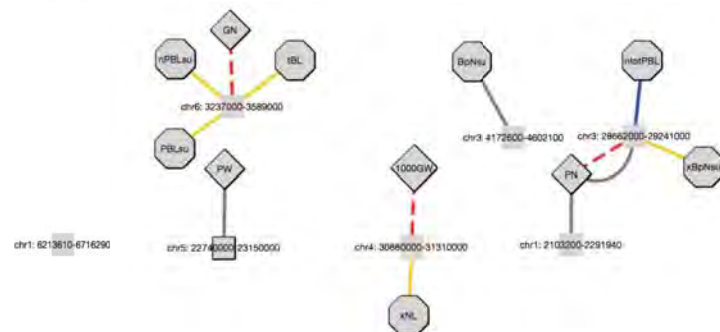

HD + RL Covariates

**d**

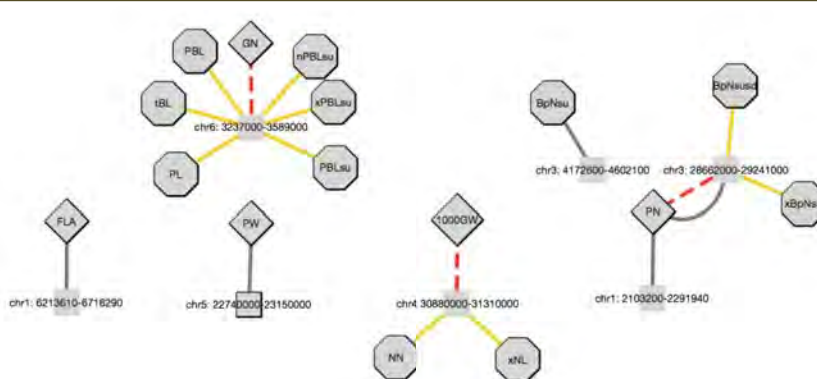

HD + NL Covariates

**e**

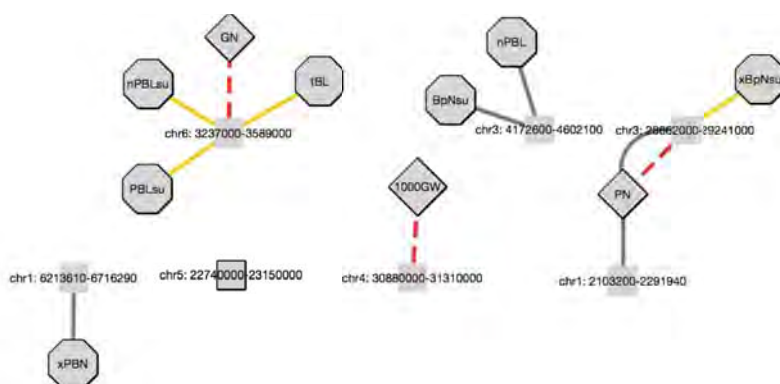

**KEY**

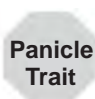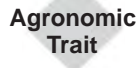

Association

— *aus*

— *indica*

- - - *Indica v. group*

— All varieties

— *tropical japonica*

- - - *Japonica v. group*

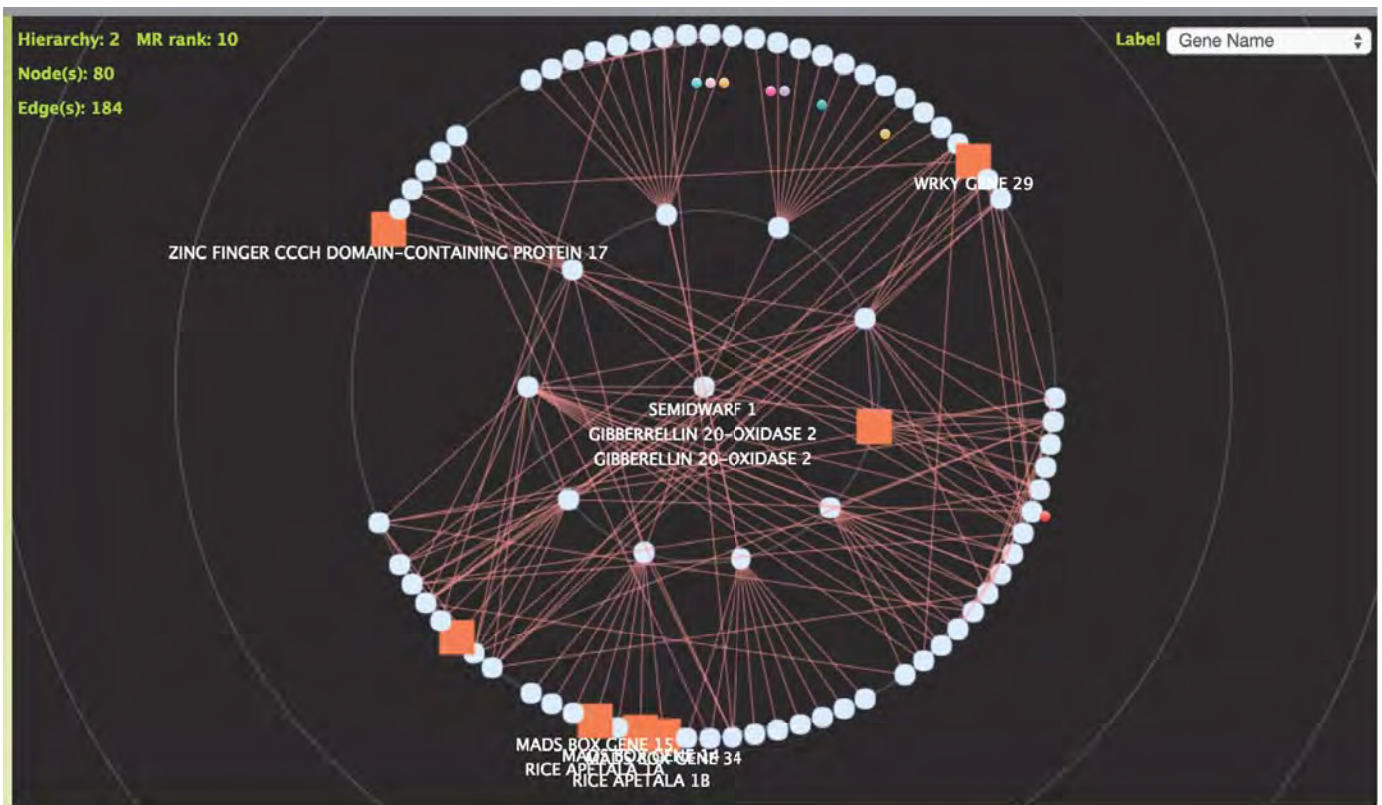

Os01g0883800  
 Hierarchy:2  
 ● MR ● MR rank

|                                           |   | MR rank  |            |            |            |            |             |            |             |
|-------------------------------------------|---|----------|------------|------------|------------|------------|-------------|------------|-------------|
|                                           |   | 1        | 2          | 3          | 4          | 5          | 10          | 15         | 50          |
| H<br>i<br>e<br>r<br>a<br>r<br>c<br>h<br>y | 1 | 2<br>(1) | 3<br>(2)   | 4<br>(3)   | 5<br>(7)   | 6<br>(8)   | 11<br>(19)  | 16<br>(30) | 51<br>(205) |
|                                           | 2 | 3<br>(2) | 7<br>(7)   | 13<br>(15) | 18<br>(24) | 27<br>(39) | 80<br>(184) | -          | -           |
|                                           | 3 | 3<br>(2) | 11<br>(11) | 30<br>(36) | 55<br>(75) | -          | -           | -          | -           |
|                                           | 4 | 3<br>(2) | 16<br>(16) | 58<br>(68) | -          | -          | -           | -          | -           |
|                                           | 5 | 3<br>(2) | 22<br>(23) | -          | -          | -          | -           | -          | -           |

|                      |                                                                                                                         |
|----------------------|-------------------------------------------------------------------------------------------------------------------------|
| Locus ID             | Os01g0883800 <a href="#">MR List</a> <a href="#">HyperTree</a>                                                          |
| Description          | Gibberellin 20 oxidase 2 (EC 1.14.11.-) (Gibberellin C-20 oxidase 2) (GA 20-oxidase 2) (Os20ox2) (Semidwarf-1 protein). |
| GO BP                | GO:0017000 : antibiotic biosynthesis                                                                                    |
| GO SLM BP            | GO:0009058 : biosynthetic process<br>GO:0009987 : cellular process                                                      |
| GO CC                |                                                                                                                         |
| GO SLM CC            |                                                                                                                         |
| GO MF                | GO:0005506 : iron ion binding<br>GO:0016216 : isopenicillin-N synthase activity                                         |
| GO SLM MF            | GO:0003824 : catalytic activity<br>GO:0005488 : binding                                                                 |
| KEGG Pathway         |                                                                                                                         |
| Transcription Factor |                                                                                                                         |
| Gene Symbol          | SD1 (SEMIDWARF 1)<br>OS20OX2 (GIBBERELLIN 20-OXIDASE 2)<br>GA20OX2 (GIBBERELLIN 20-OXIDASE 2)                           |
| WoLF PSORT           | nucl:3, cyto:3, plas:3, cyto_nucl:3, nucl_plas:3, cyto_plas:3                                                           |
| MSU ID               | LOC_Os01g66100                                                                                                          |

**Supplementary Figure 73. Coexpression network for *SEMIDWARF1*.** The gene coexpression network was constructed on the RiceFRIEND database (<http://ricefrend.dna.affrc.go.jp/>) using *SD1* as a single gene guide.



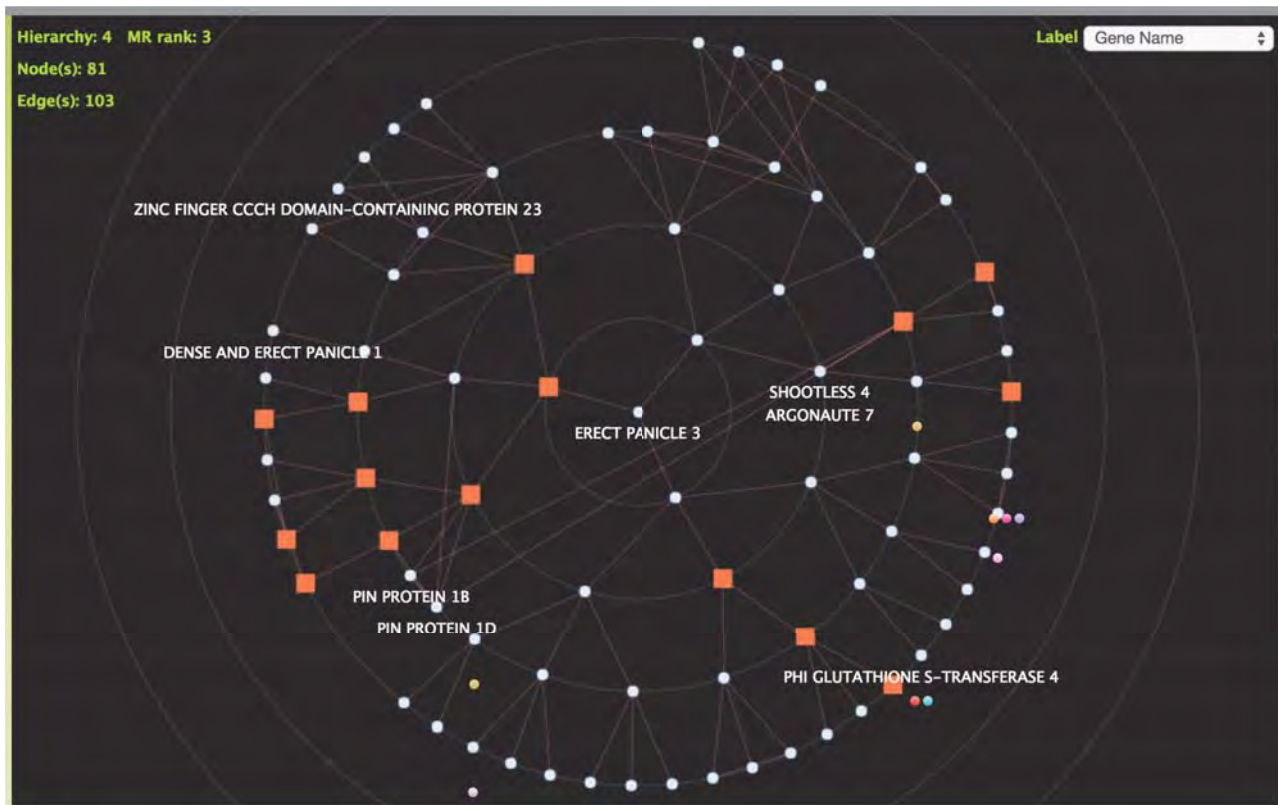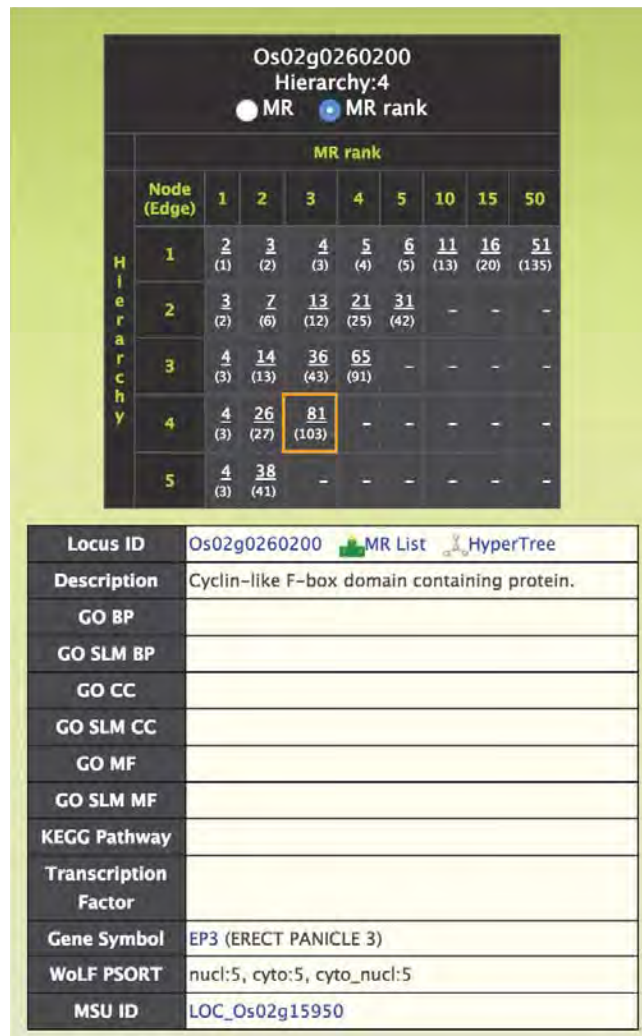

**Supplementary Figure 74. Coexpression network for *ERECT PANICLE 3*.** The gene coexpression network was constructed on the RiceFRIEND database (<http://ricefrend.dna.affrc.go.jp/>) using *EP3* as a single gene guide.

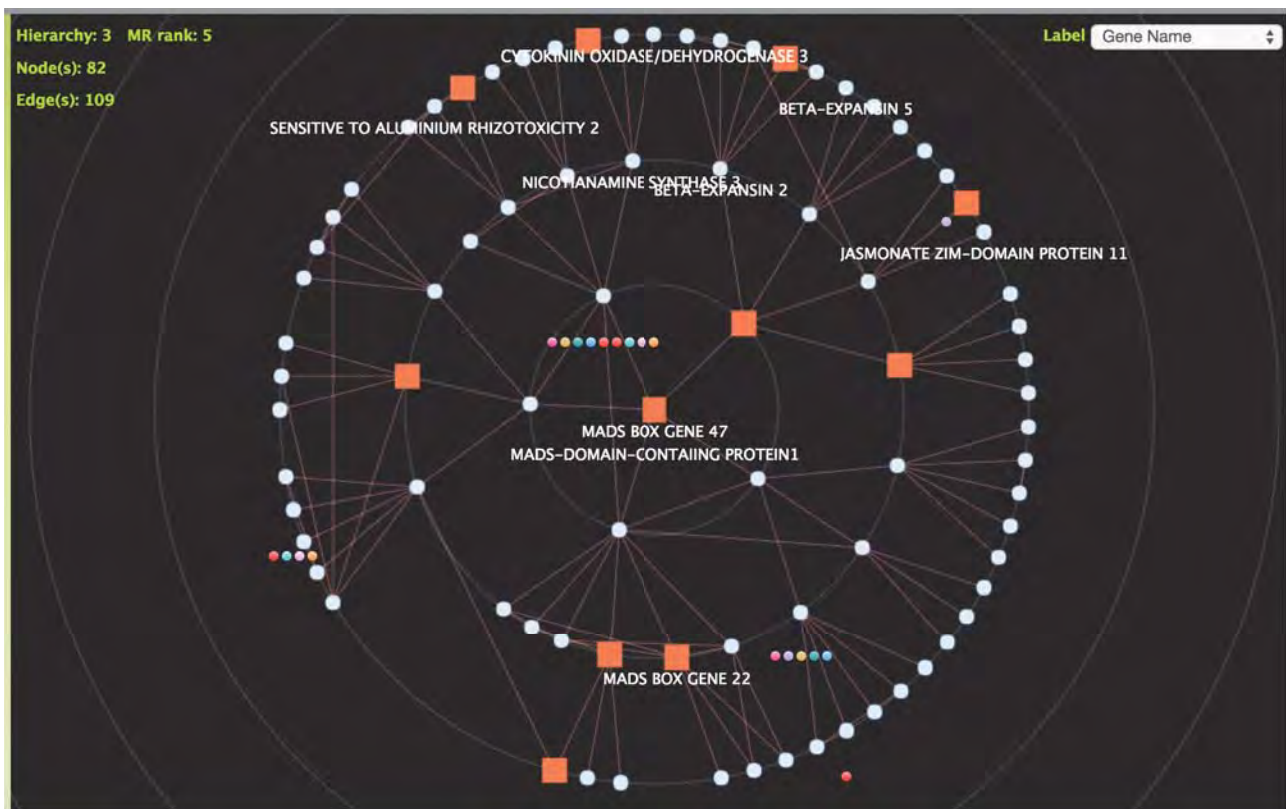

Os03g0186600  
Hierarchy:3  
● MR ● MR rank

|           |   | MR rank  |            |            |            |             |             |            |             |
|-----------|---|----------|------------|------------|------------|-------------|-------------|------------|-------------|
|           |   | 1        | 2          | 3          | 4          | 5           | 10          | 15         | 50          |
| Hierarchy | 1 | 2<br>(1) | 3<br>(2)   | 4<br>(4)   | 5<br>(5)   | 6<br>(8)    | 11<br>(16)  | 16<br>(28) | 51<br>(209) |
|           | 2 | 2<br>(1) | 5<br>(4)   | 9<br>(10)  | 16<br>(20) | 22<br>(27)  | 86<br>(142) | -          | -           |
|           | 3 | 2<br>(1) | 8<br>(7)   | 22<br>(28) | 46<br>(56) | 82<br>(109) | -           | -          | -           |
|           | 4 | 2<br>(1) | 11<br>(11) | 41<br>(47) | -          | -           | -           | -          | -           |
|           | 5 | 2<br>(1) | 13<br>(13) | 82<br>(94) | -          | -           | -           | -          | -           |

|                      |                                                                                          |
|----------------------|------------------------------------------------------------------------------------------|
| Locus ID             | Os03g0186600 <a href="#">MR List</a> <a href="#">HyperTree</a>                           |
| Description          | Transcription factor, MADS-box domain containing protein.                                |
| GO BP                |                                                                                          |
| GO SLM BP            |                                                                                          |
| GO CC                | GO:0005634 : nucleus                                                                     |
| GO SLM CC            | GO:0005634 : nucleus                                                                     |
| GO MF                | GO:0003700 : transcription factor activity<br>GO:0043565 : sequence-specific DNA binding |
| GO SLM MF            | GO:0003677 : DNA binding<br>GO:0003700 : transcription factor activity                   |
| KEGG Pathway         |                                                                                          |
| Transcription Factor | MADS                                                                                     |
| Gene Symbol          | MADS47 (MADS BOX GENE 47)<br>MDP1 (MADS-DOMAIN-CONTAINING PROTEIN1)                      |
| WoLF PSORT           | nucl:14                                                                                  |
| MSU ID               | LOC_Os03g08754                                                                           |

**Supplementary Figure 75. Coexpression network for *OsMADS47*.** The gene coexpression network was constructed on the RiceFRIEND database (<http://ricefriend.dna.affrc.go.jp/>) using *OsMADS47* as a single gene guide.

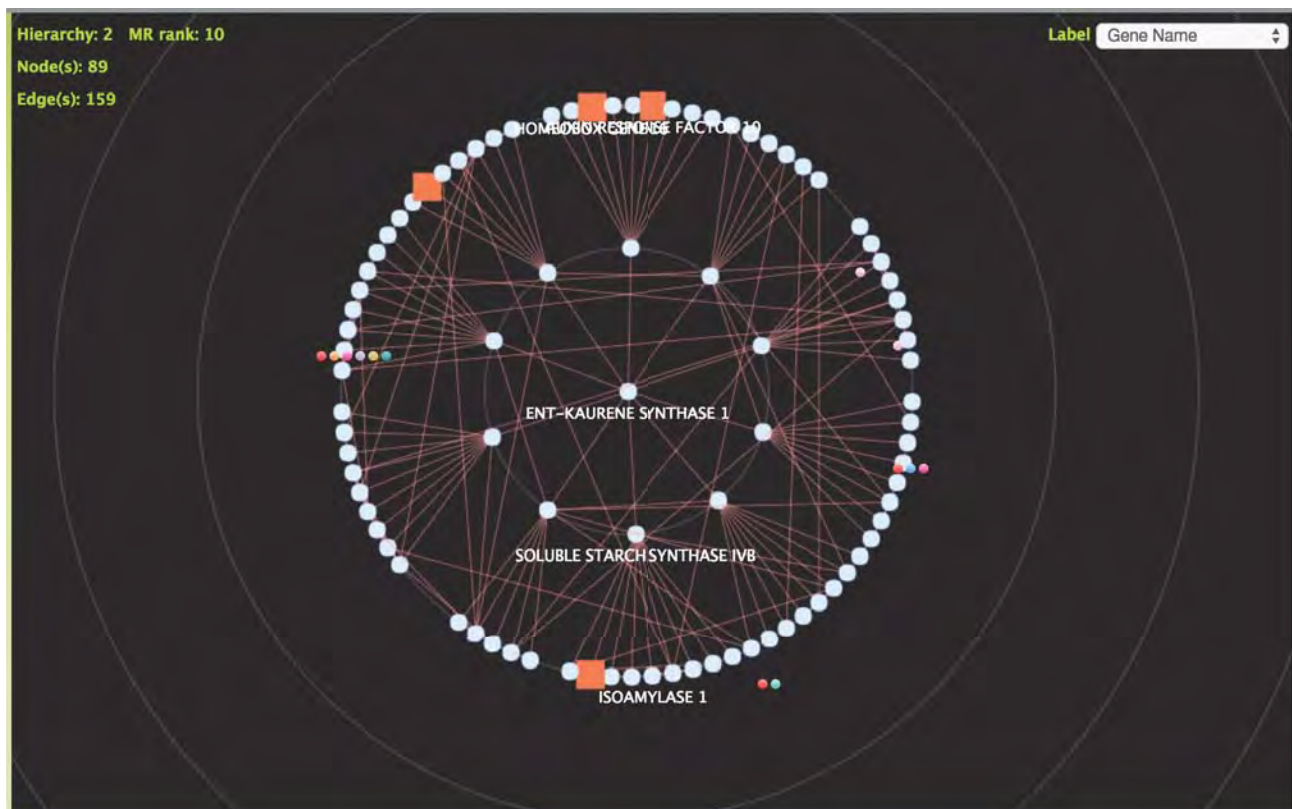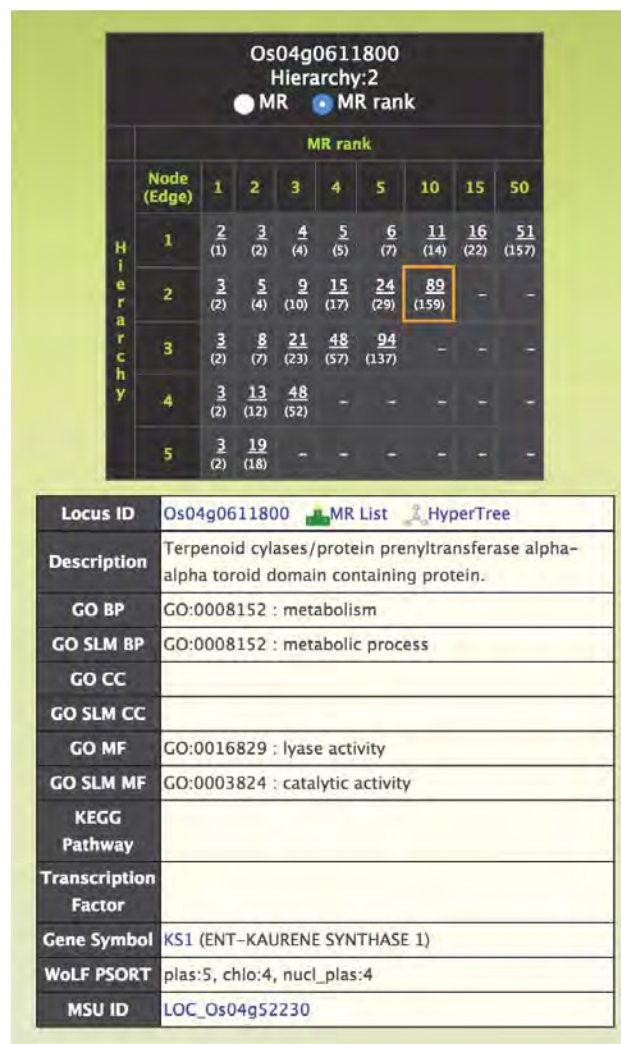

**Supplementary Figure 76. Coexpression network for *ent-Kaurene synthase* (*OsKSI*).** The gene coexpression network was constructed on the RiceFRIEND database (<http://ricefrend.dna.affrc.go.jp/>) using *OsKSI* as a single gene guide.



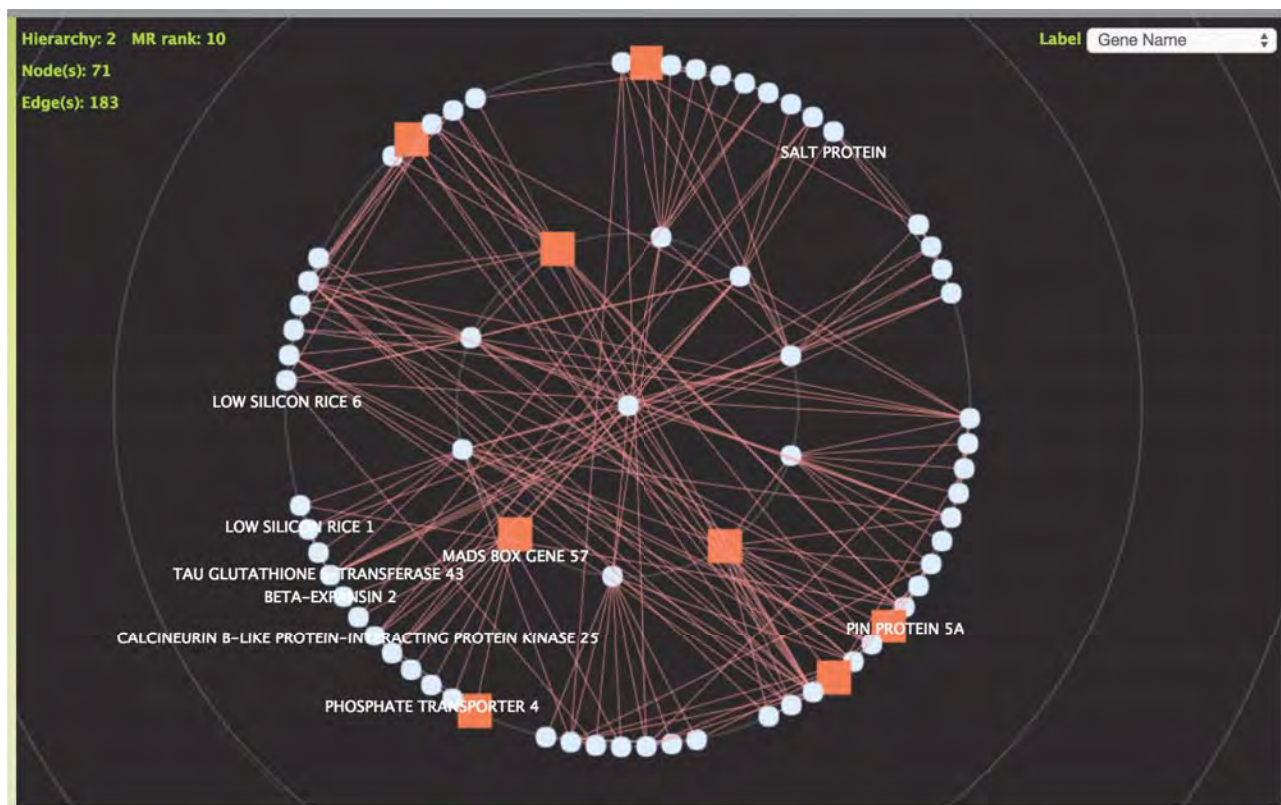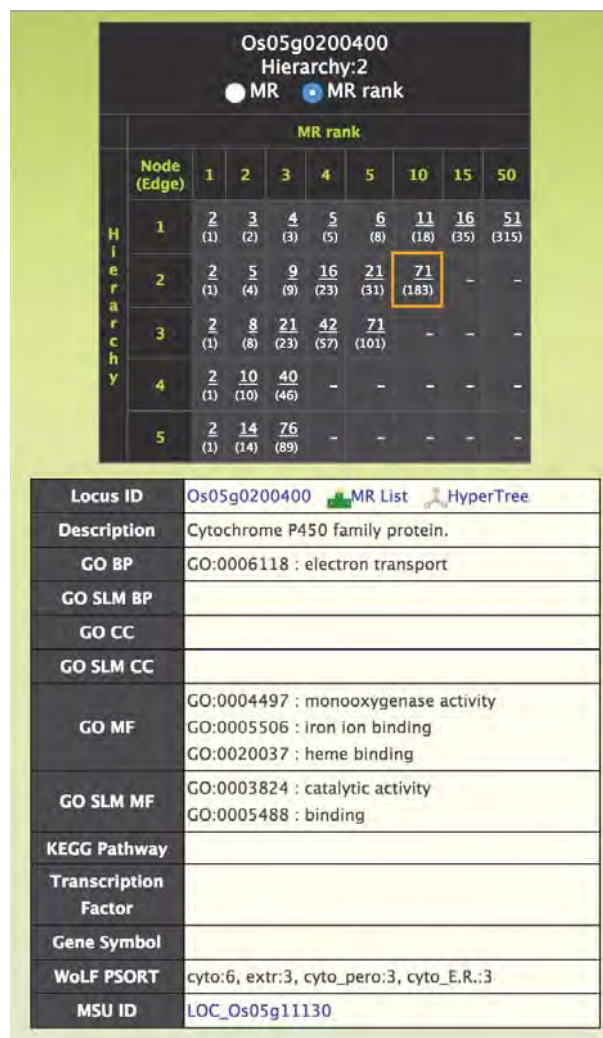

**Supplementary Figure 77. Coexpression network for *CYP90D3*.** The gene coexpression network was constructed on the RiceFRIEND database (<http://ricefrend.dna.affrc.go.jp/>) using *CYP90D3* as a single gene guide.

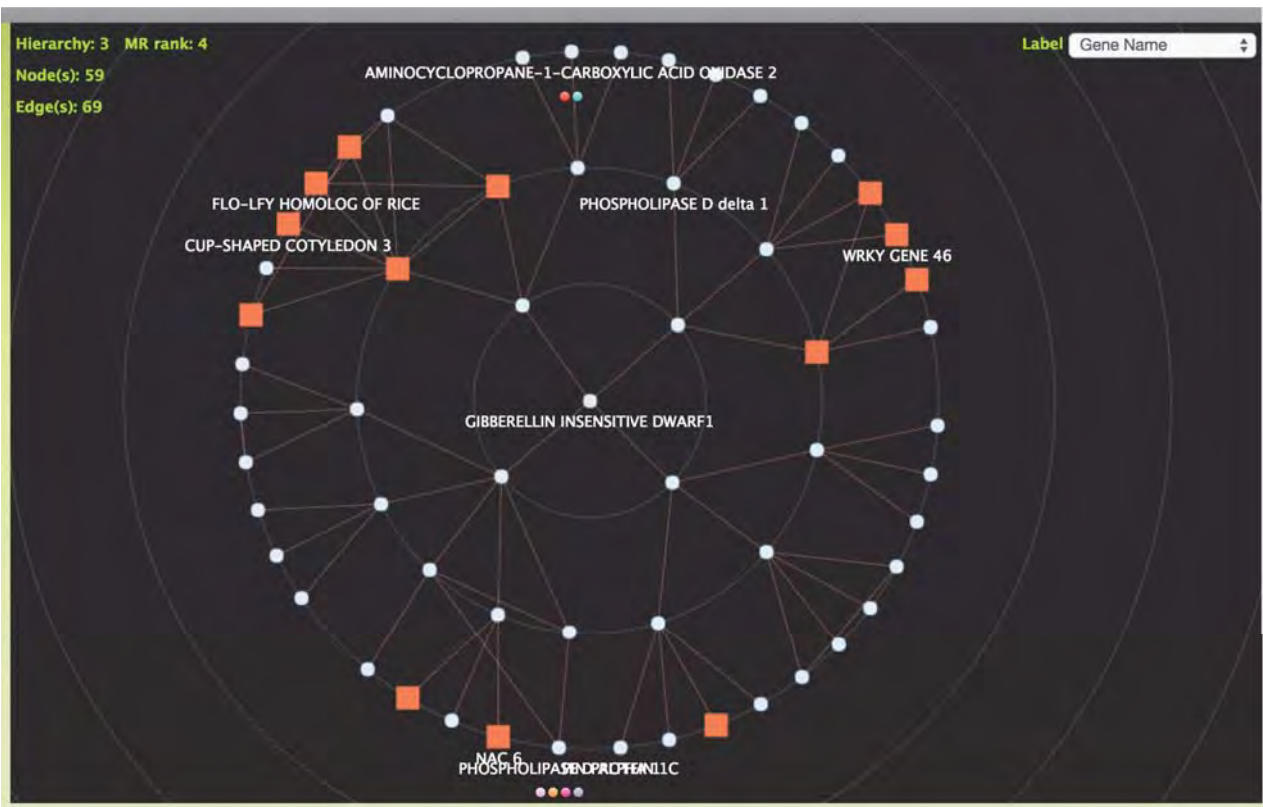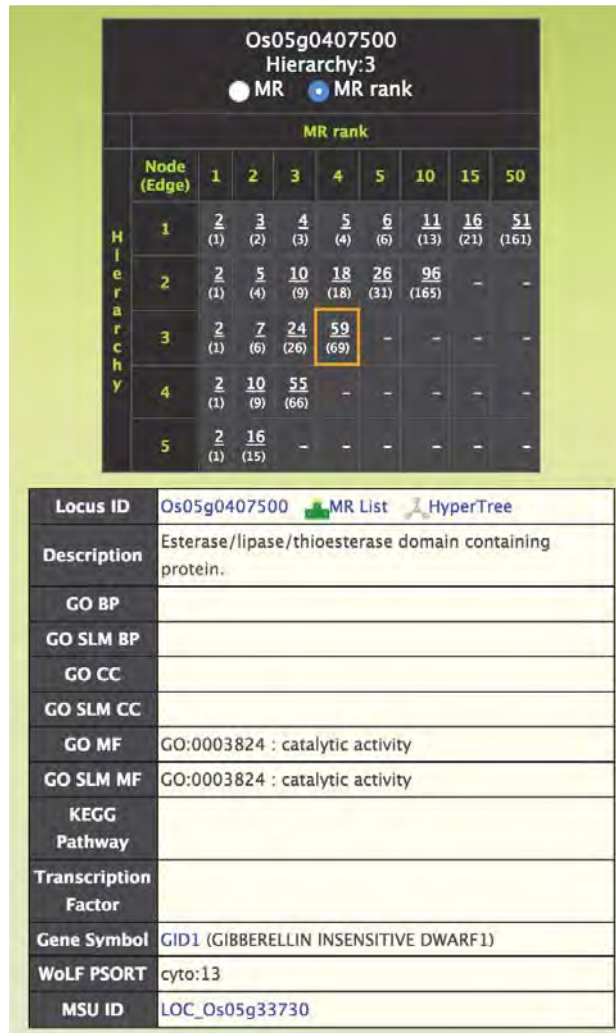

**Supplementary Figure 78. Coexpression network for *GIBBERELLIN INSENSITIVE DWARF 1*.** The gene coexpression network was constructed on the RiceFRIEND database (<http://ricefrend.dna.affrc.go.jp/>) using *GID1* as a single gene guide.



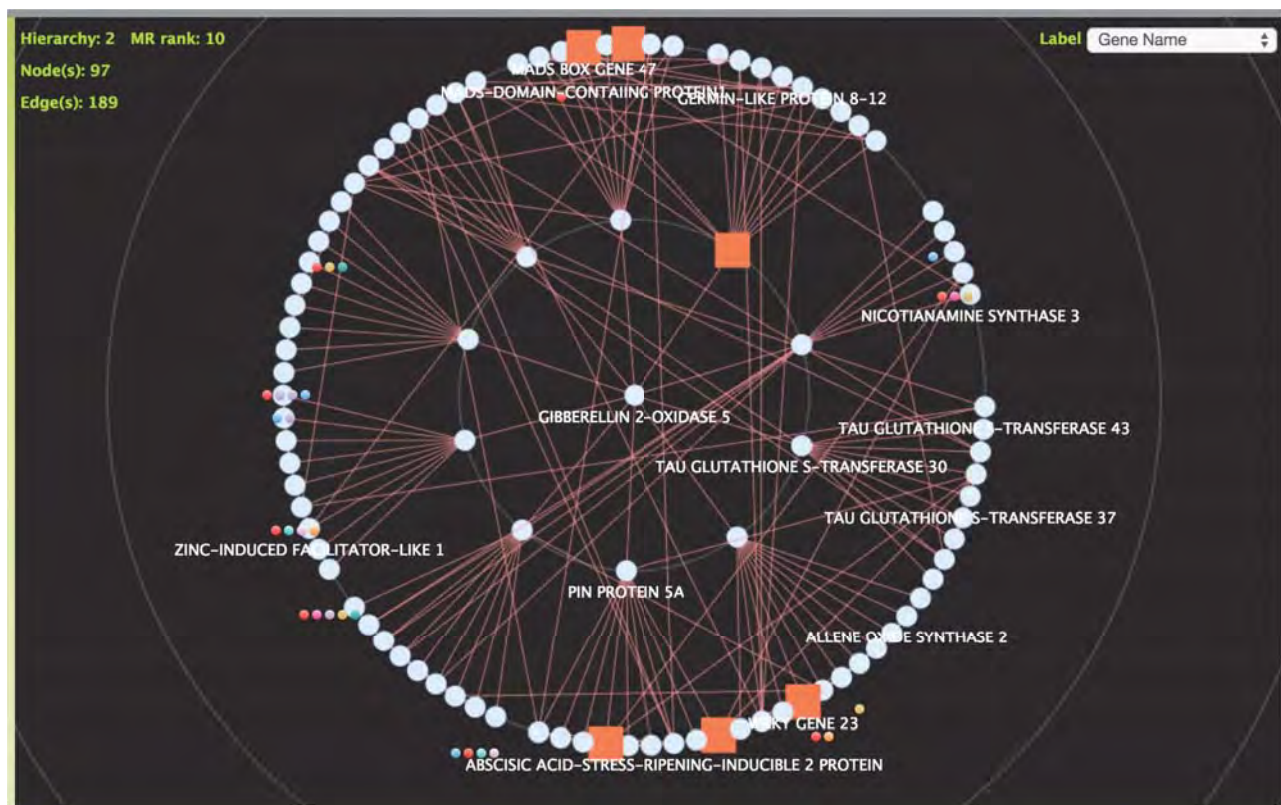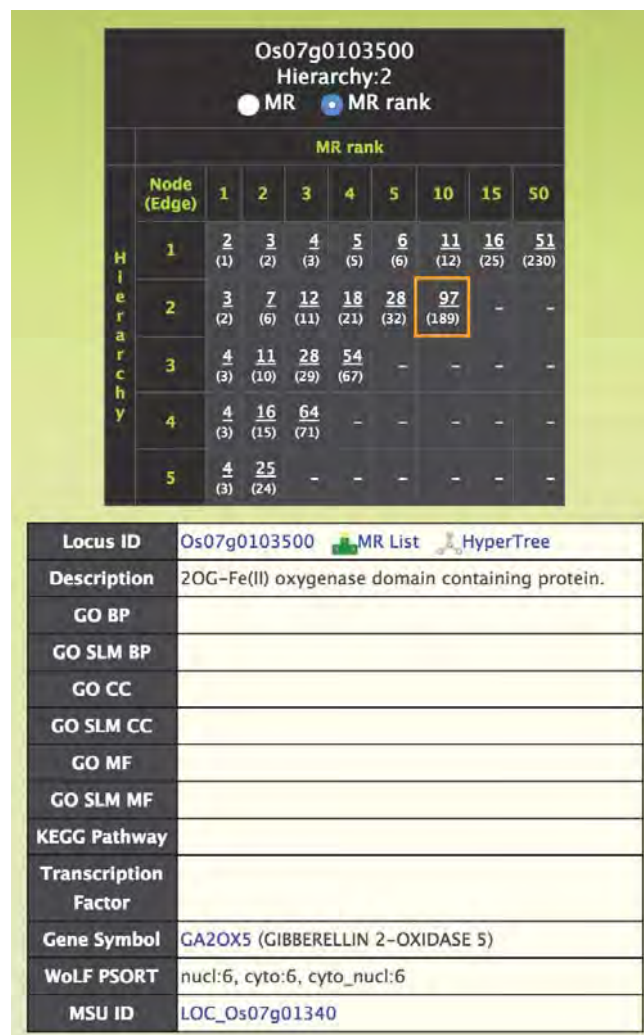

**Supplementary Figure 79. Coexpression network for gibberellin oxidase *OsGA2ox-5*.** The gene coexpression network was constructed on the RiceFRIEND database (<http://ricefrend.dna.affrc.go.jp/>) using *OsGA2ox-5* as a single gene guide.



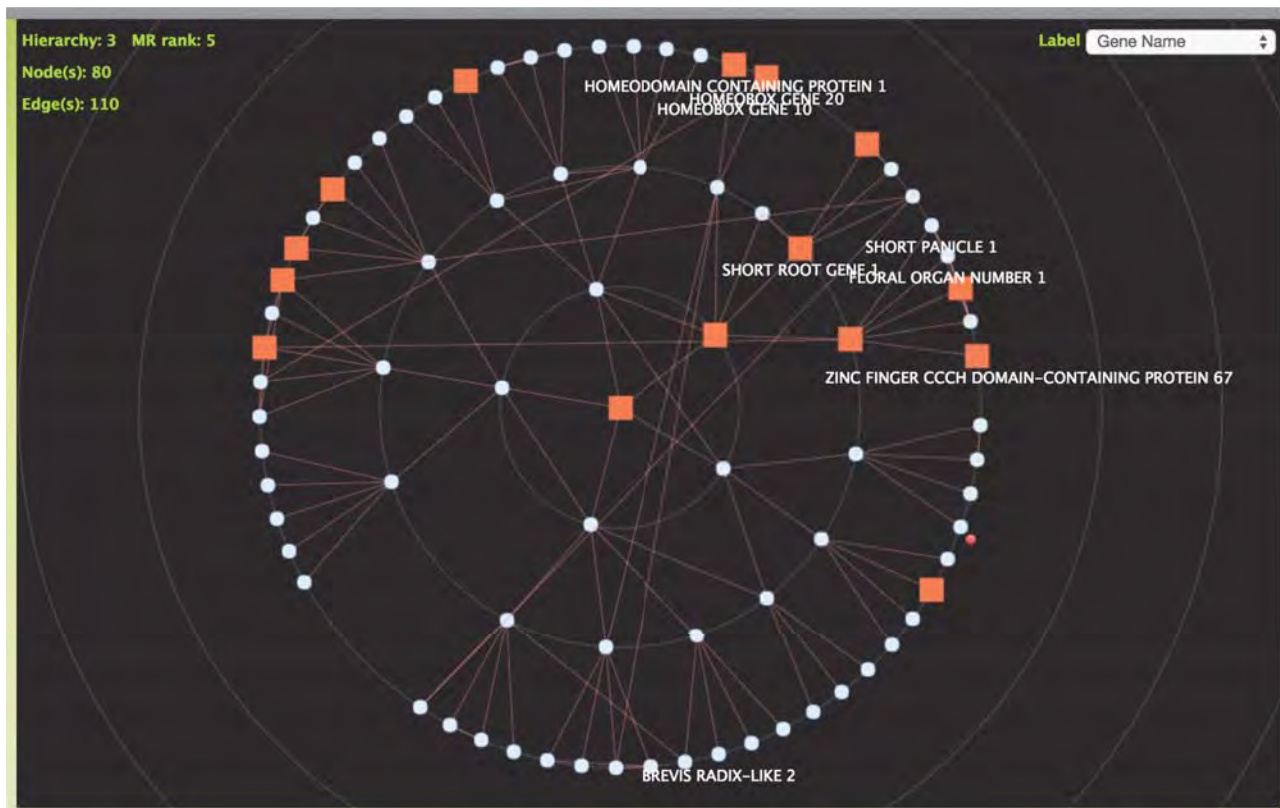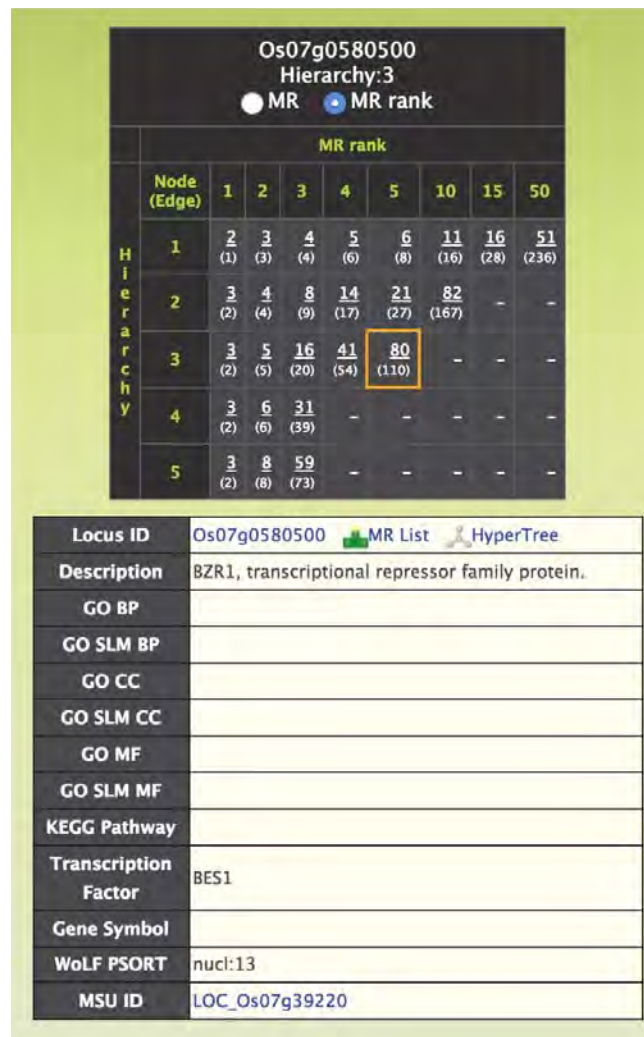

**Supplementary Figure 80. Coexpression network for *BRASSINAZOLE RESISTANT 1*.** The gene coexpression network was constructed on the RiceFRIEND database (<http://ricefrend.dna.affrc.go.jp/>) using *BZR1* as a single gene guide.

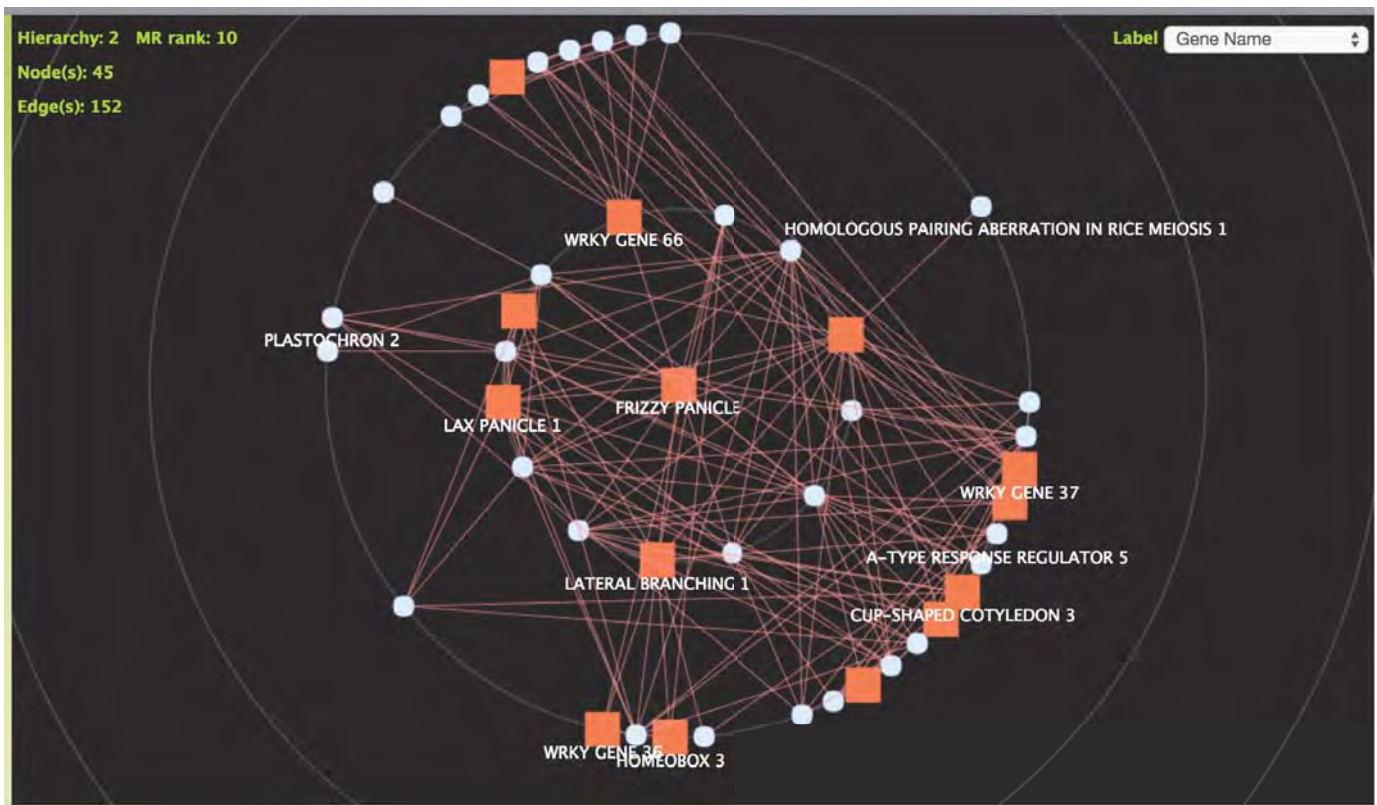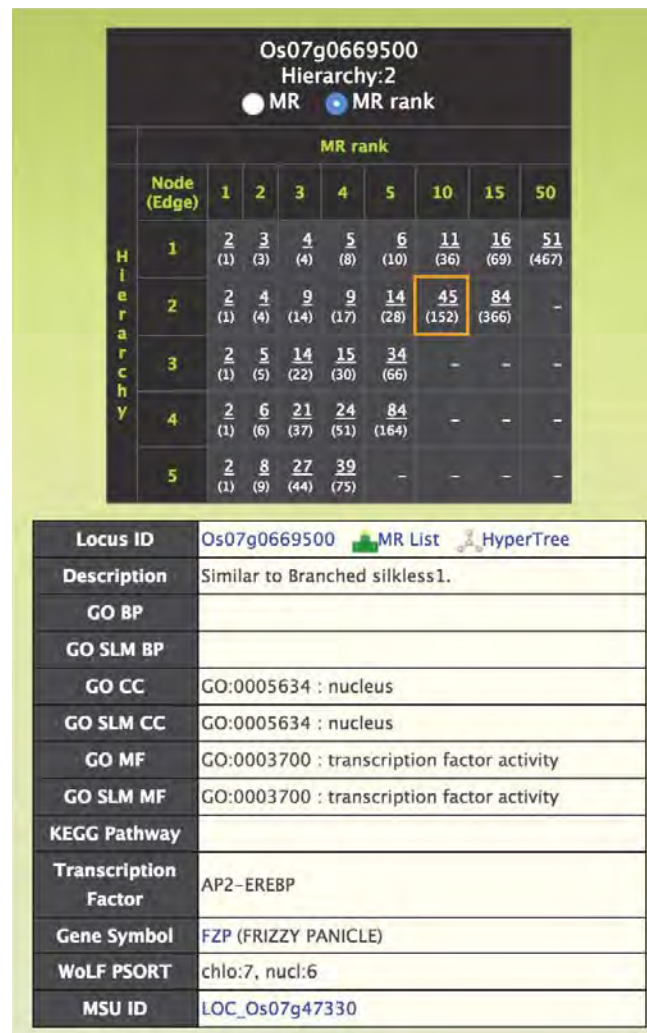

**Supplementary Figure 81. Coexpression network for *FRIZZY PANICLE 1*.** The gene coexpression network was constructed on the RiceFRIEND database (<http://ricefrend.dna.affrc.go.jp/>) using *FZP1* as a single gene guide.



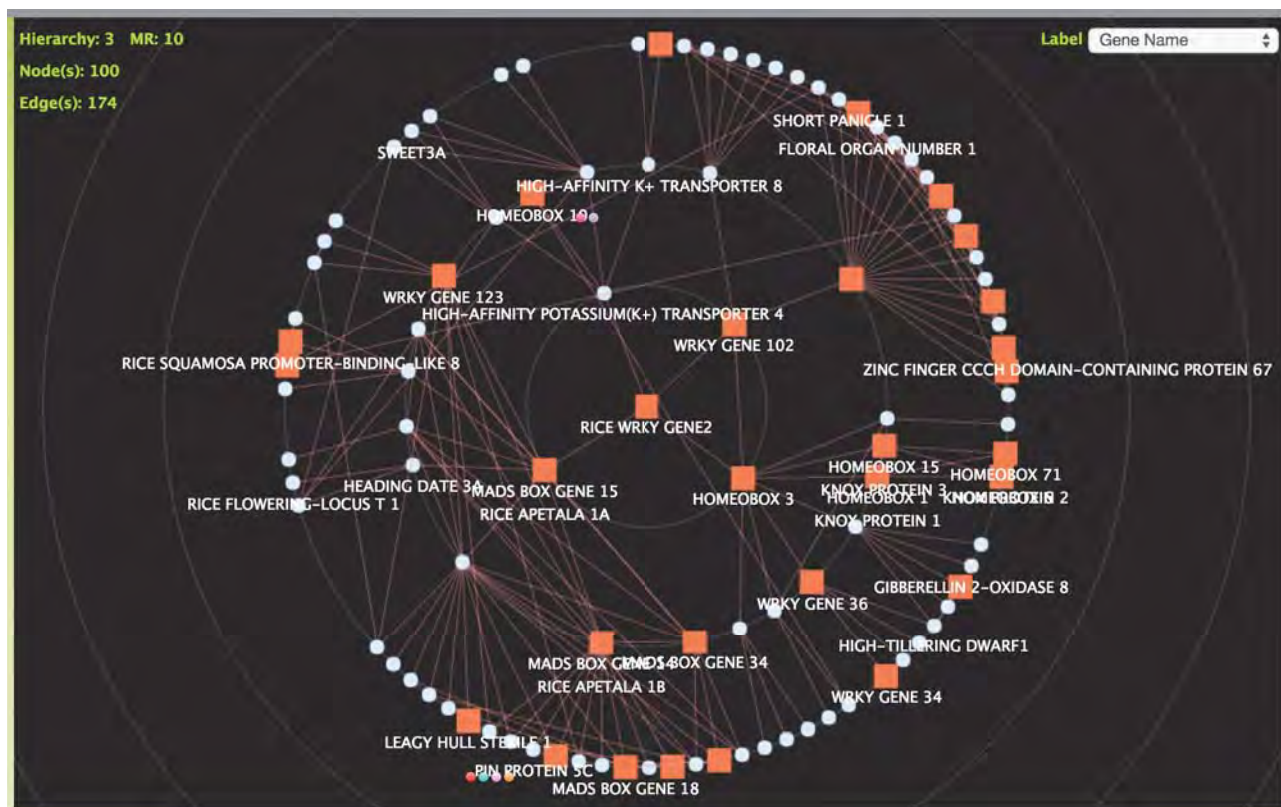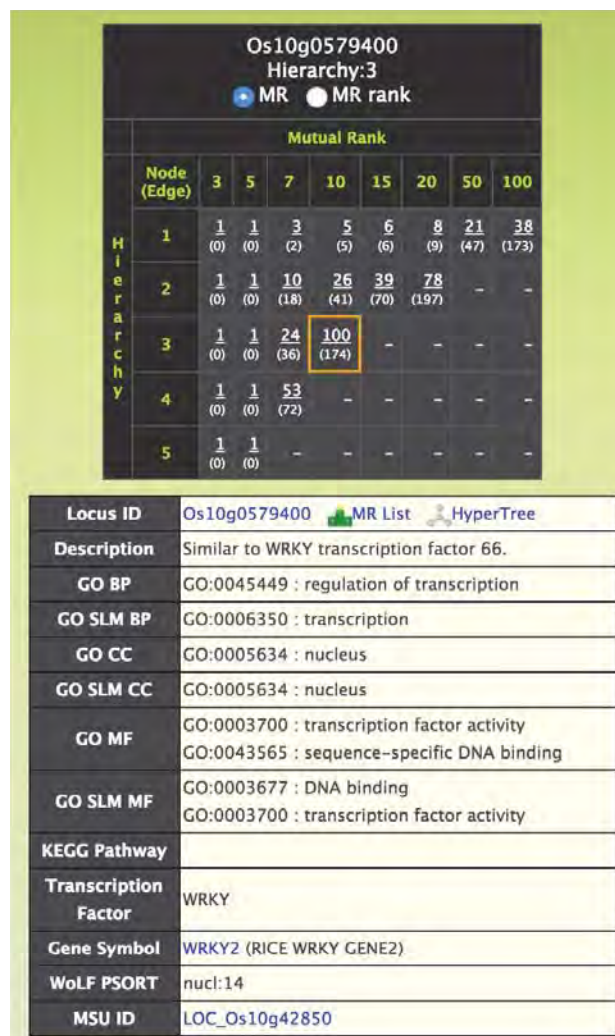

**Supplementary Figure 82. Coexpression network for rice *WRKY2*.** The gene coexpression network was constructed on the RiceFRIEND database (<http://ricefrend.dna.affrc.go.jp/>) using *WRKY2* as a single gene guide.



# Chromosome 1

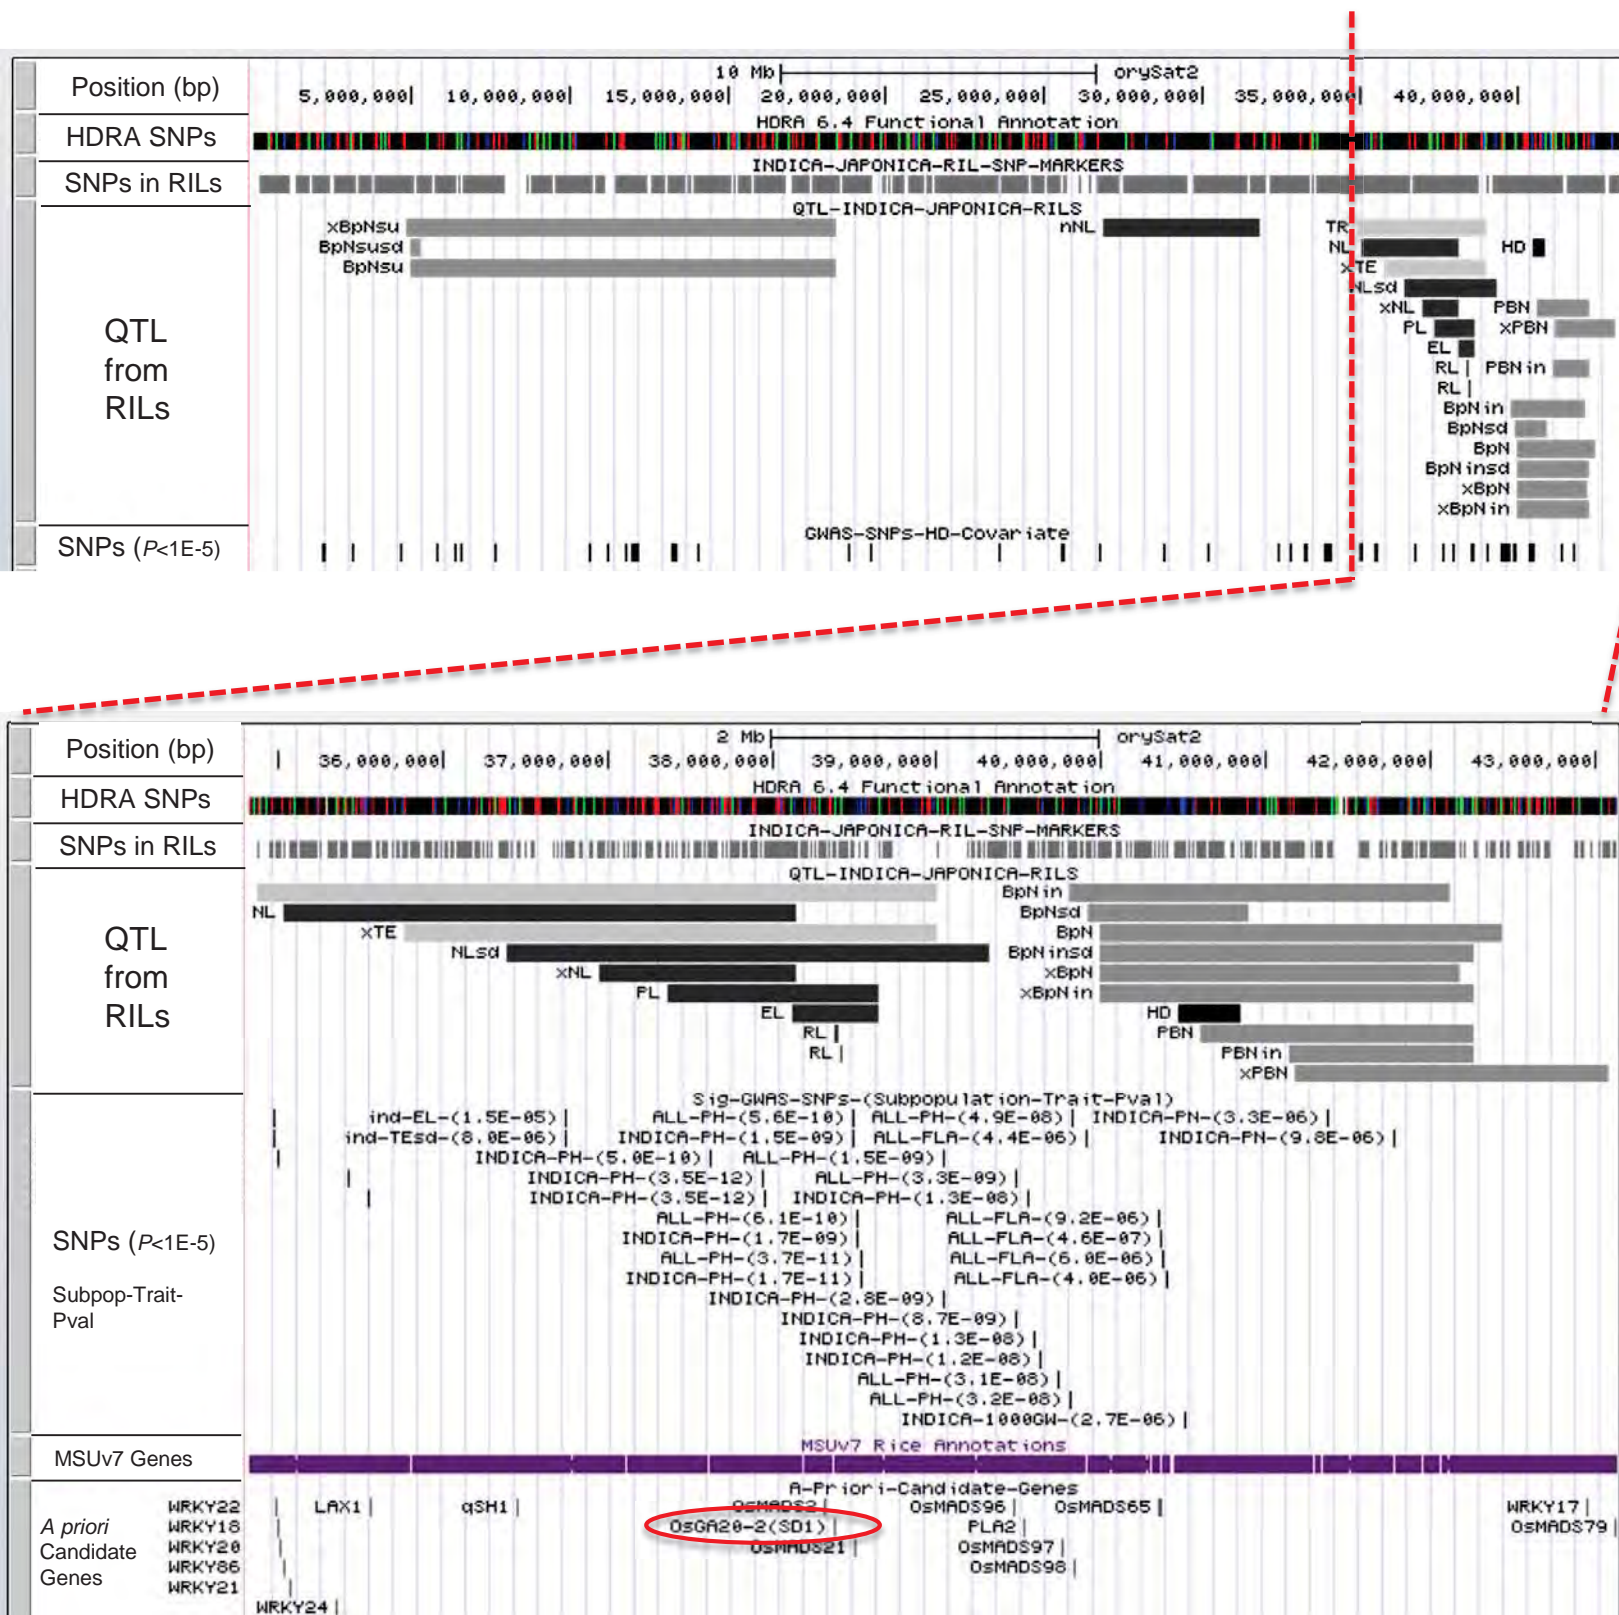

**Supplementary Figure 83. Chromosome 1 GWAS and QTL results.** Screenshots from the UCSC Browser with tracks depicting: high-density rice array (HDRA) SNPs; SNPs used in the recombinant inbred line (RIL) population; QTL identified for traits in the RILs; and significant SNPs associated with traits from the GWAS panel. The zoom in includes gene annotations from MSUv7, as well as *a priori* candidate genes from Supplementary Table 5. Candidates <30kb from a GWAS SNP are circled in red. Trait abbreviations correspond to Supplementary Table 2.

# Chromosome 2

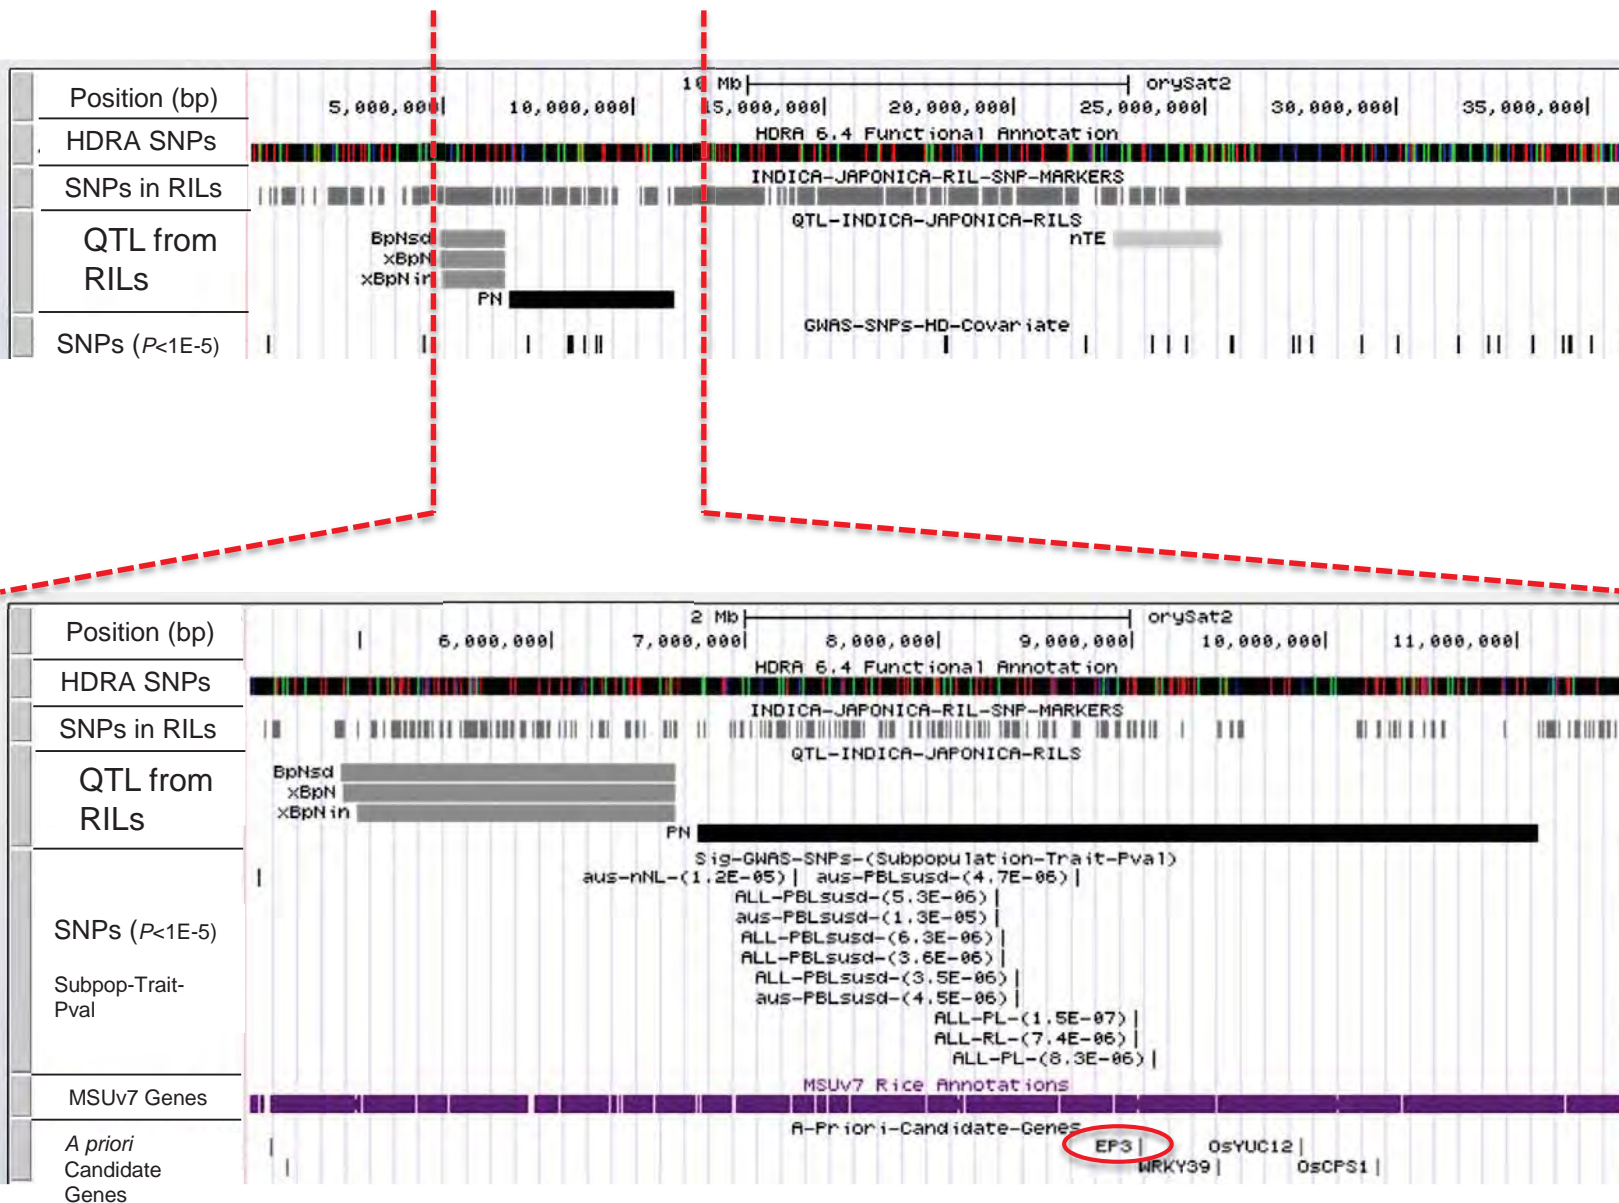

**Supplementary Figure 84. Chromosome 2 GWAS and QTL results.** Screenshots from the UCSC Browser with tracks depicting: high-density rice array (HDRA) SNPs; SNPs used in the recombinant inbred line (RIL) population; QTL identified for traits in the RILs; and significant SNPs associated with traits from the GWAS panel. The zoom in includes gene annotations from MSUv7, as well as *a priori* candidate genes from Supplementary Table 5. Candidates <30kb from a GWAS SNP are circled in red. Trait abbreviations correspond to Supplementary Table 2.



# Chromosome 3

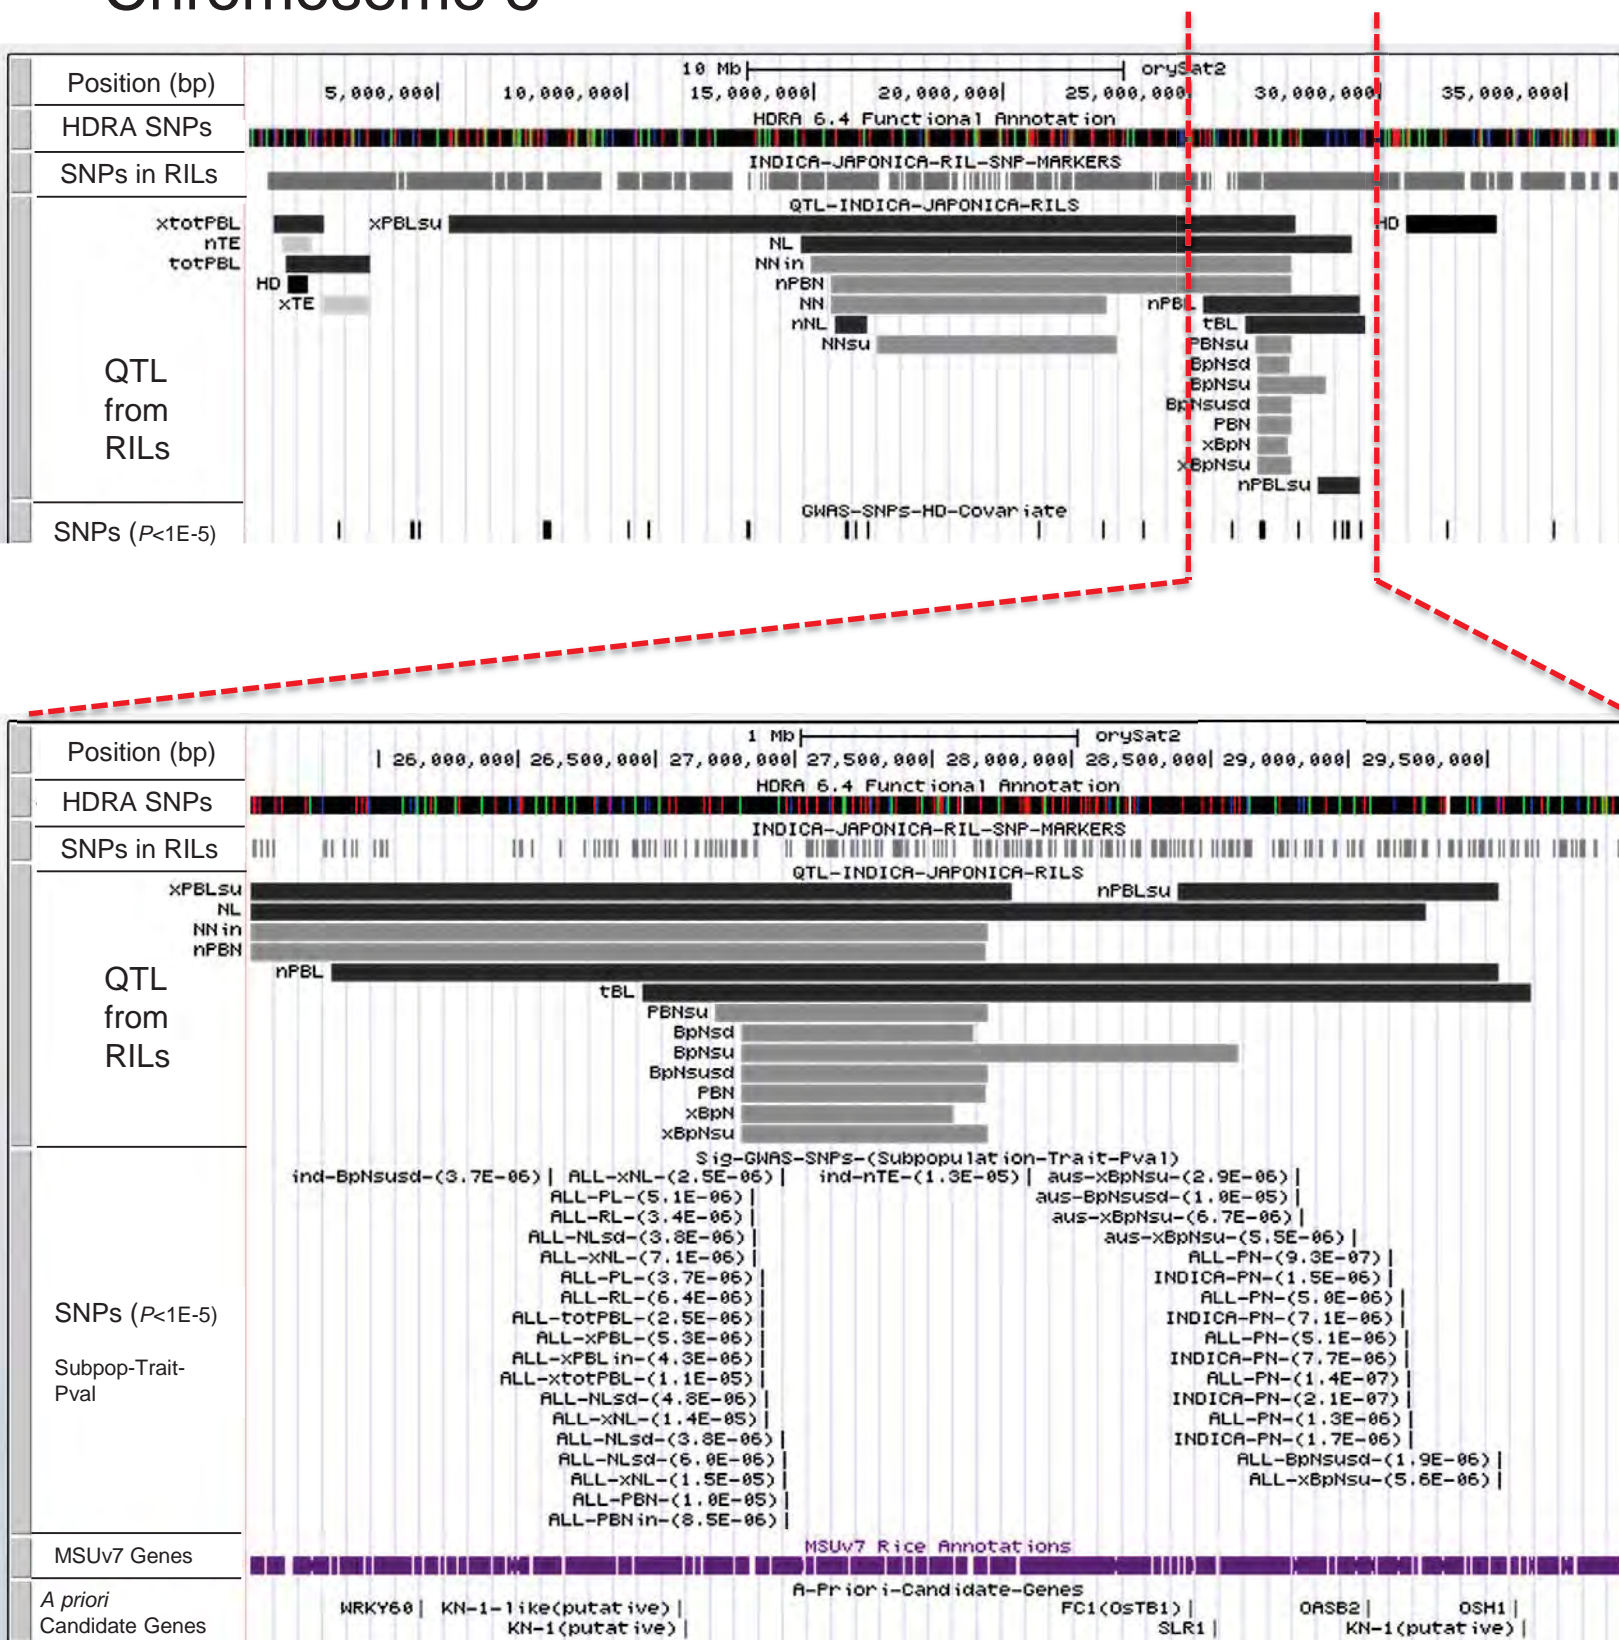

**Supplementary Figure 85. Chromosome 3 GWAS and QTL results.** Screenshots from the UCSC Browser with tracks depicting: high-density rice array (HDRA) SNPs; SNPs used in the recombinant inbred line (RIL) population; QTL identified for traits in the RILs; and significant SNPs associated with traits from the GWAS panel. The zoom in includes gene annotations from MSUv7, as well as *a priori* candidate genes from Supplementary Table 5. Candidates <30kb from a GWAS SNP are circled in red. Trait abbreviations correspond to Supplementary Table 2.



# Chromosome 4

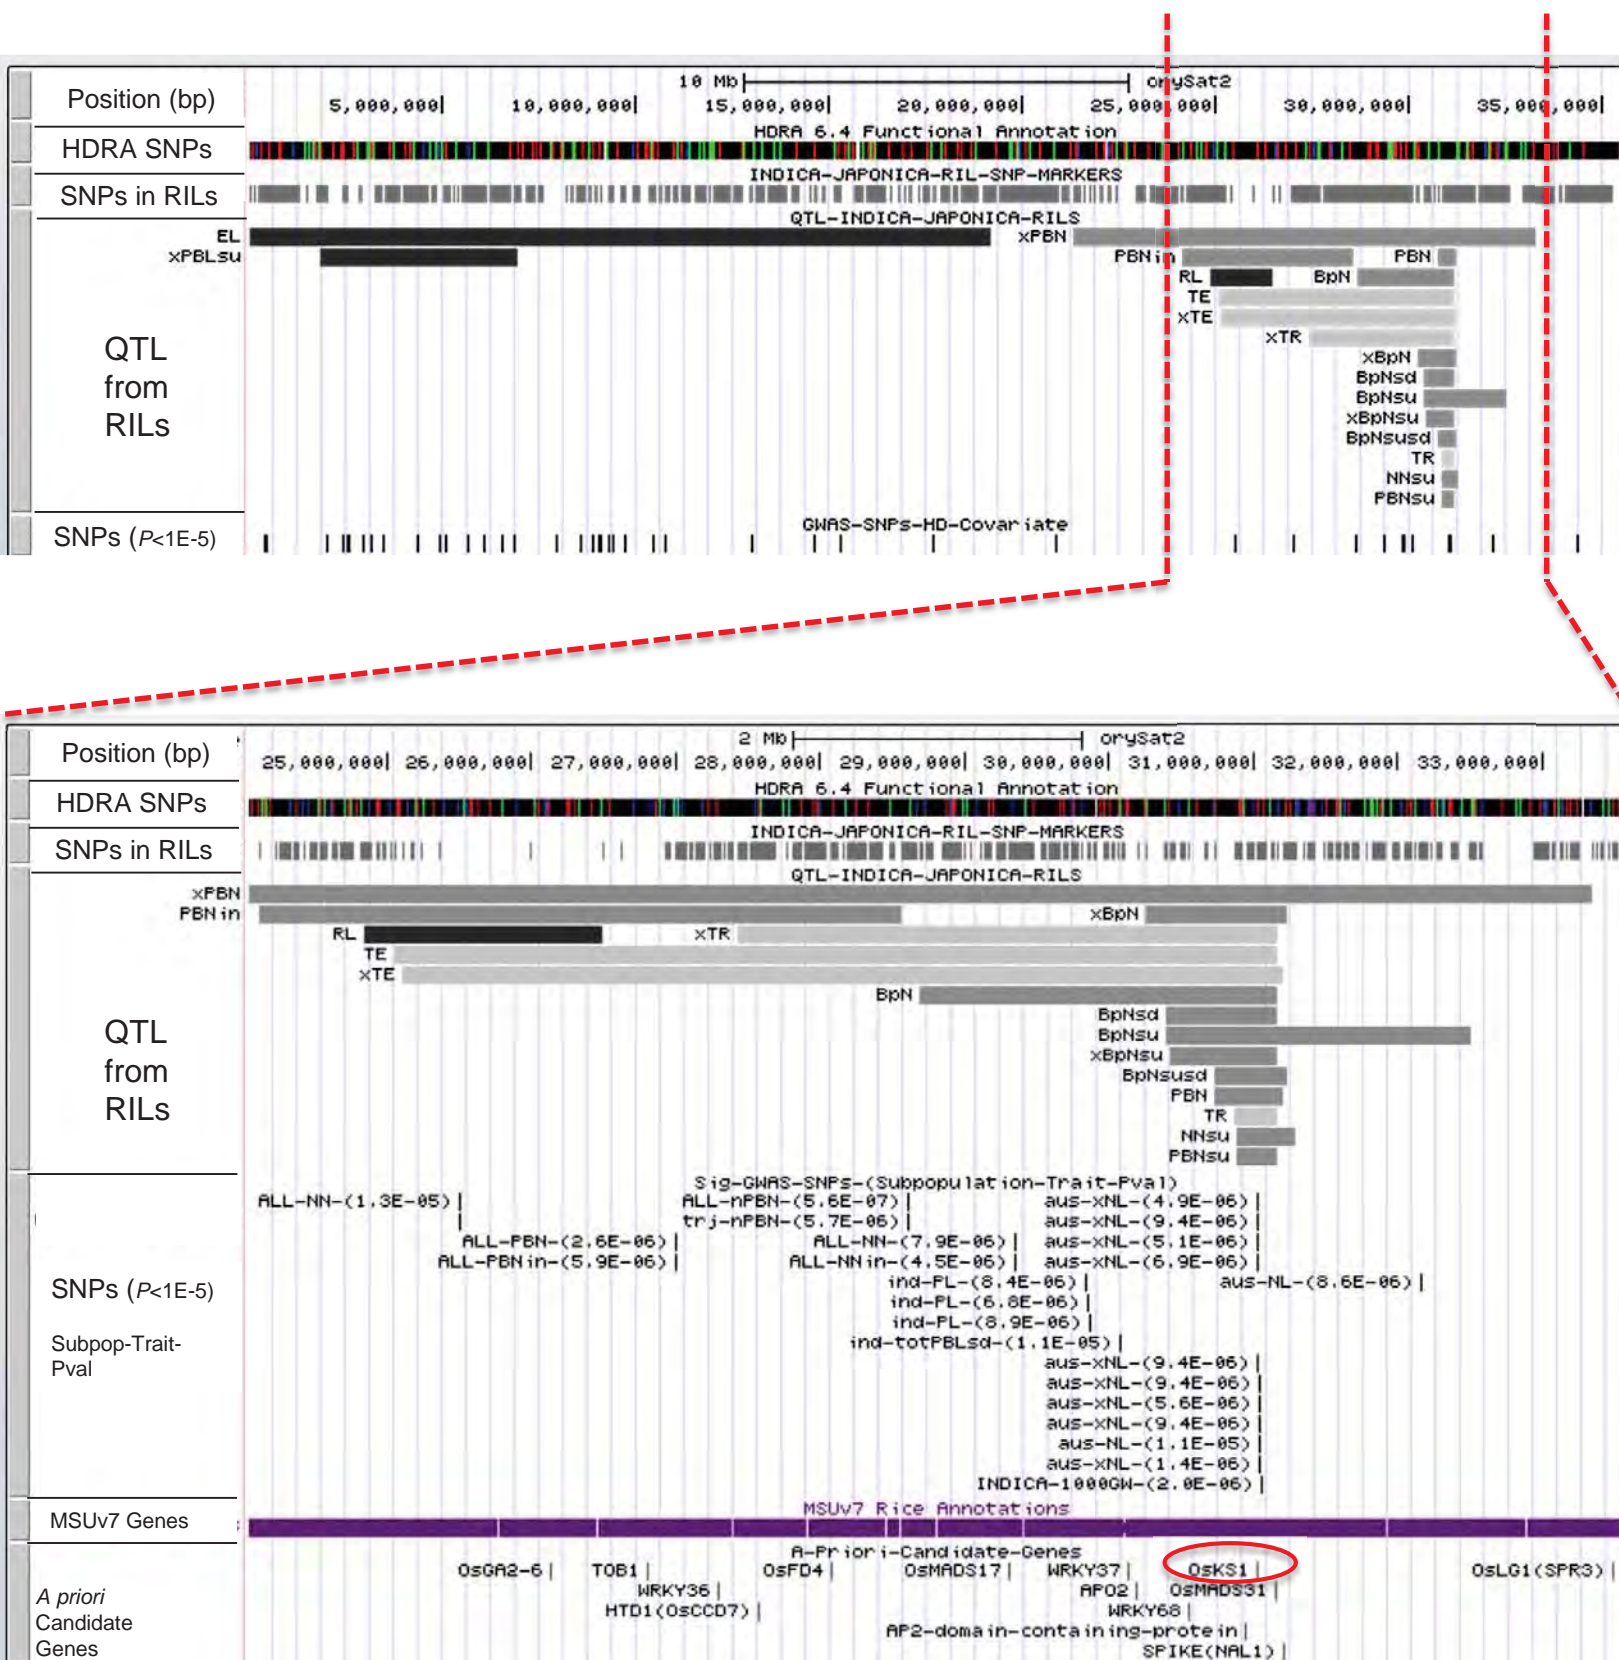

**Supplementary Figure 86. Chromosome 4 GWAS and QTL results.** Screenshots from the UCSC Browser with tracks depicting: high-density rice array (HDRA) SNPs; SNPs used in the recombinant inbred line (RIL) population; QTL identified for traits in the RILs; and significant SNPs associated with traits from the GWAS panel. The zoom in includes gene annotations from MSUv7, as well as *a priori* candidate genes from Supplementary Table 5. Candidates <30kb from a GWAS SNP are circled in red. Trait abbreviations correspond to Supplementary Table 2.

# Chromosome 5

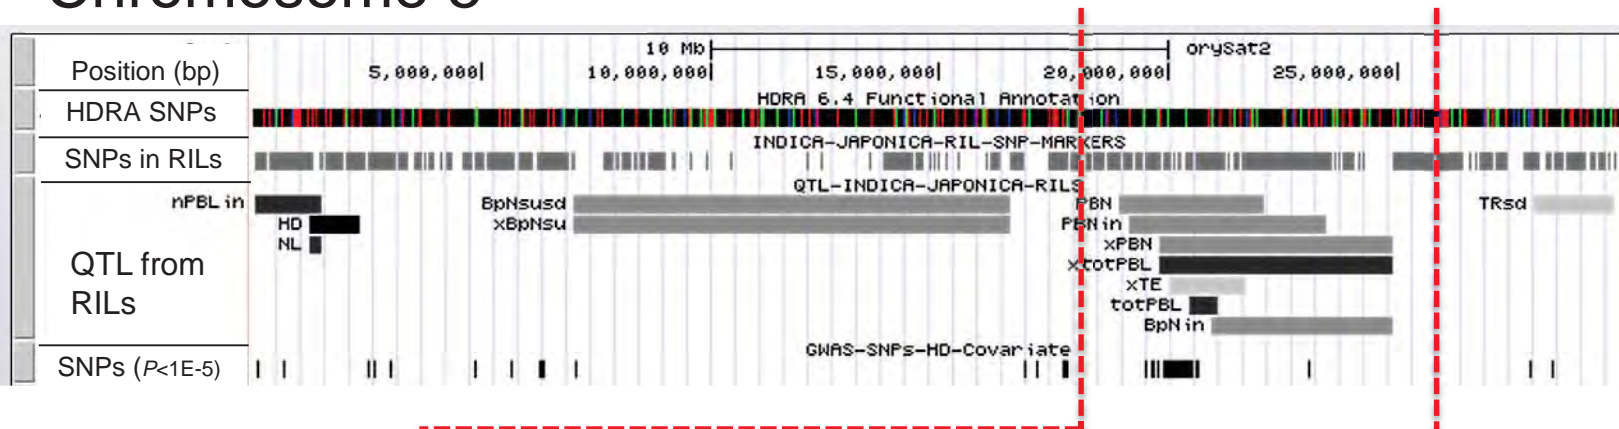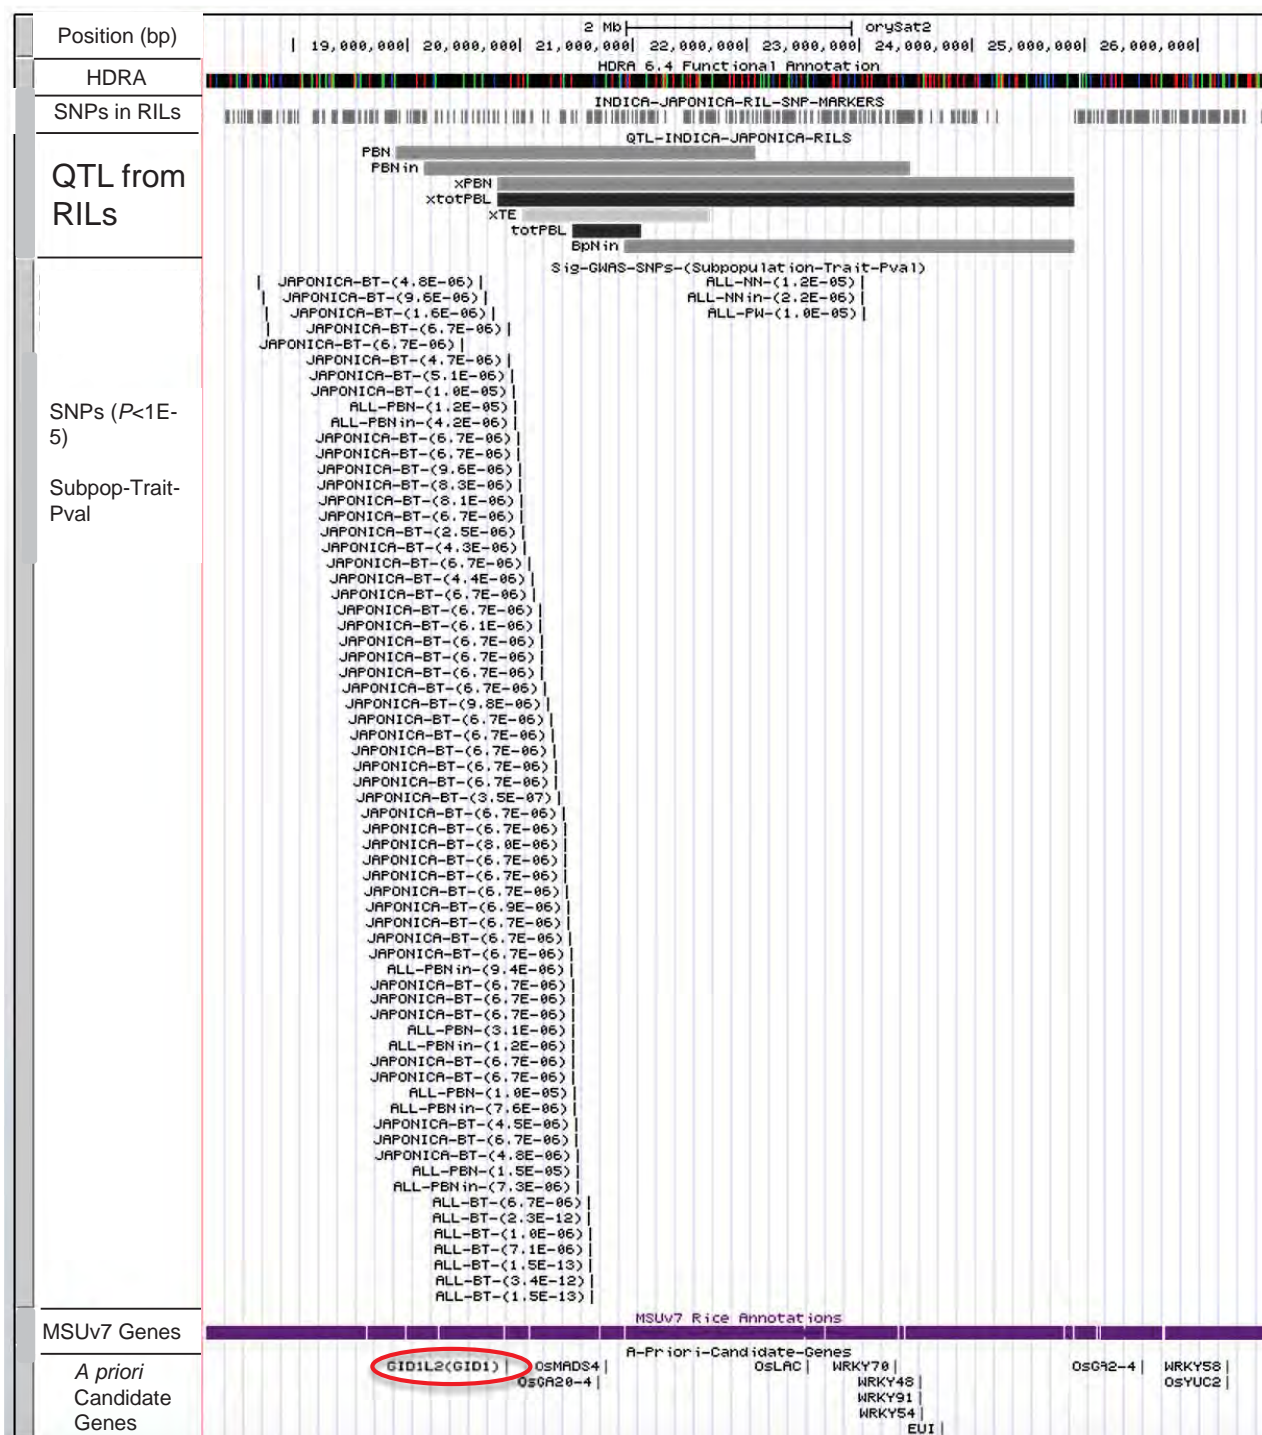

**Supplementary Figure 87. Chromosome 5 GWAS and QTL results.** Screenshots from the UCSC Browser with tracks depicting: high-density rice array (HDRA) SNPs; SNPs used in the recombinant inbred line (RIL) population; QTL identified for traits in the RILs; and significant SNPs associated with traits from the GWAS panel. The zoom in includes gene annotations from MSUv7, as well as *a priori* candidate genes from Supplementary Table 5. Candidates <30kb from a GWAS SNP are circled in red. Trait abbreviations correspond to Supplementary Table 2.



# Chromosome 6

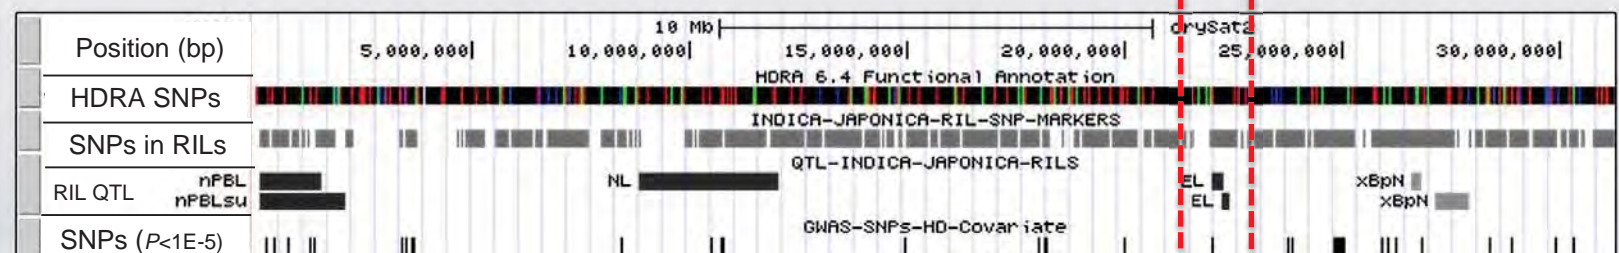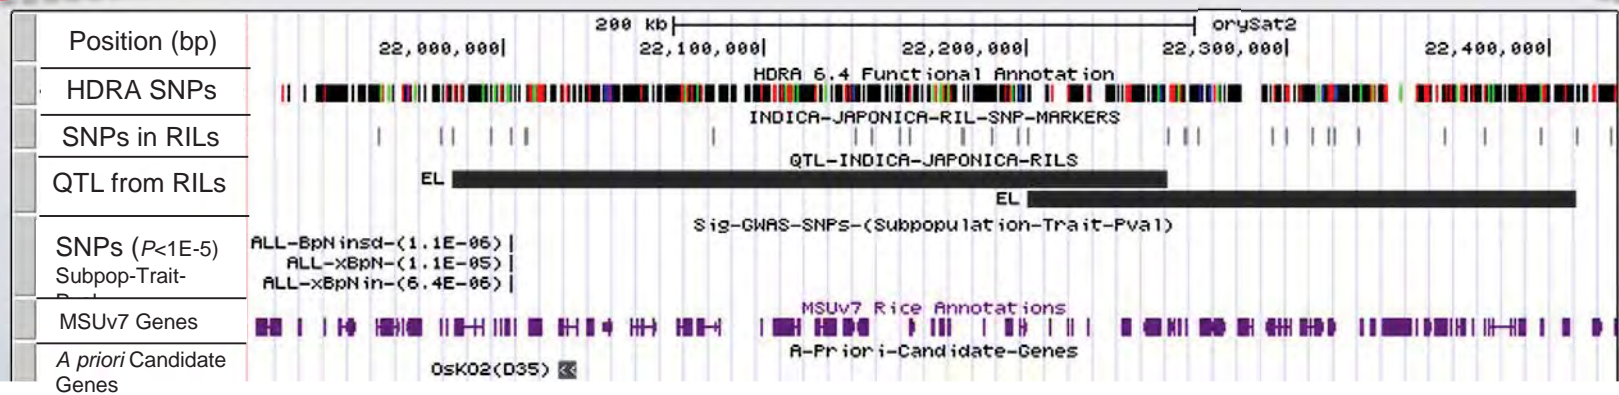

**Supplementary Figure 88. Chromosome 6 GWAS and QTL results.** Screenshots from the UCSC Browser with tracks depicting: high-density rice array (HDRA) SNPs; SNPs used in the recombinant inbred line (RIL) population; QTL identified for traits in the RILs; and significant SNPs associated with traits from the GWAS panel. The zoom in includes gene annotations from MSUv7, as well as *a priori* candidate genes from Supplementary Table 5. Candidates <30kb from a GWAS SNP are circled in red. Trait abbreviations correspond to Supplementary Table 2.



# Chromosome 7

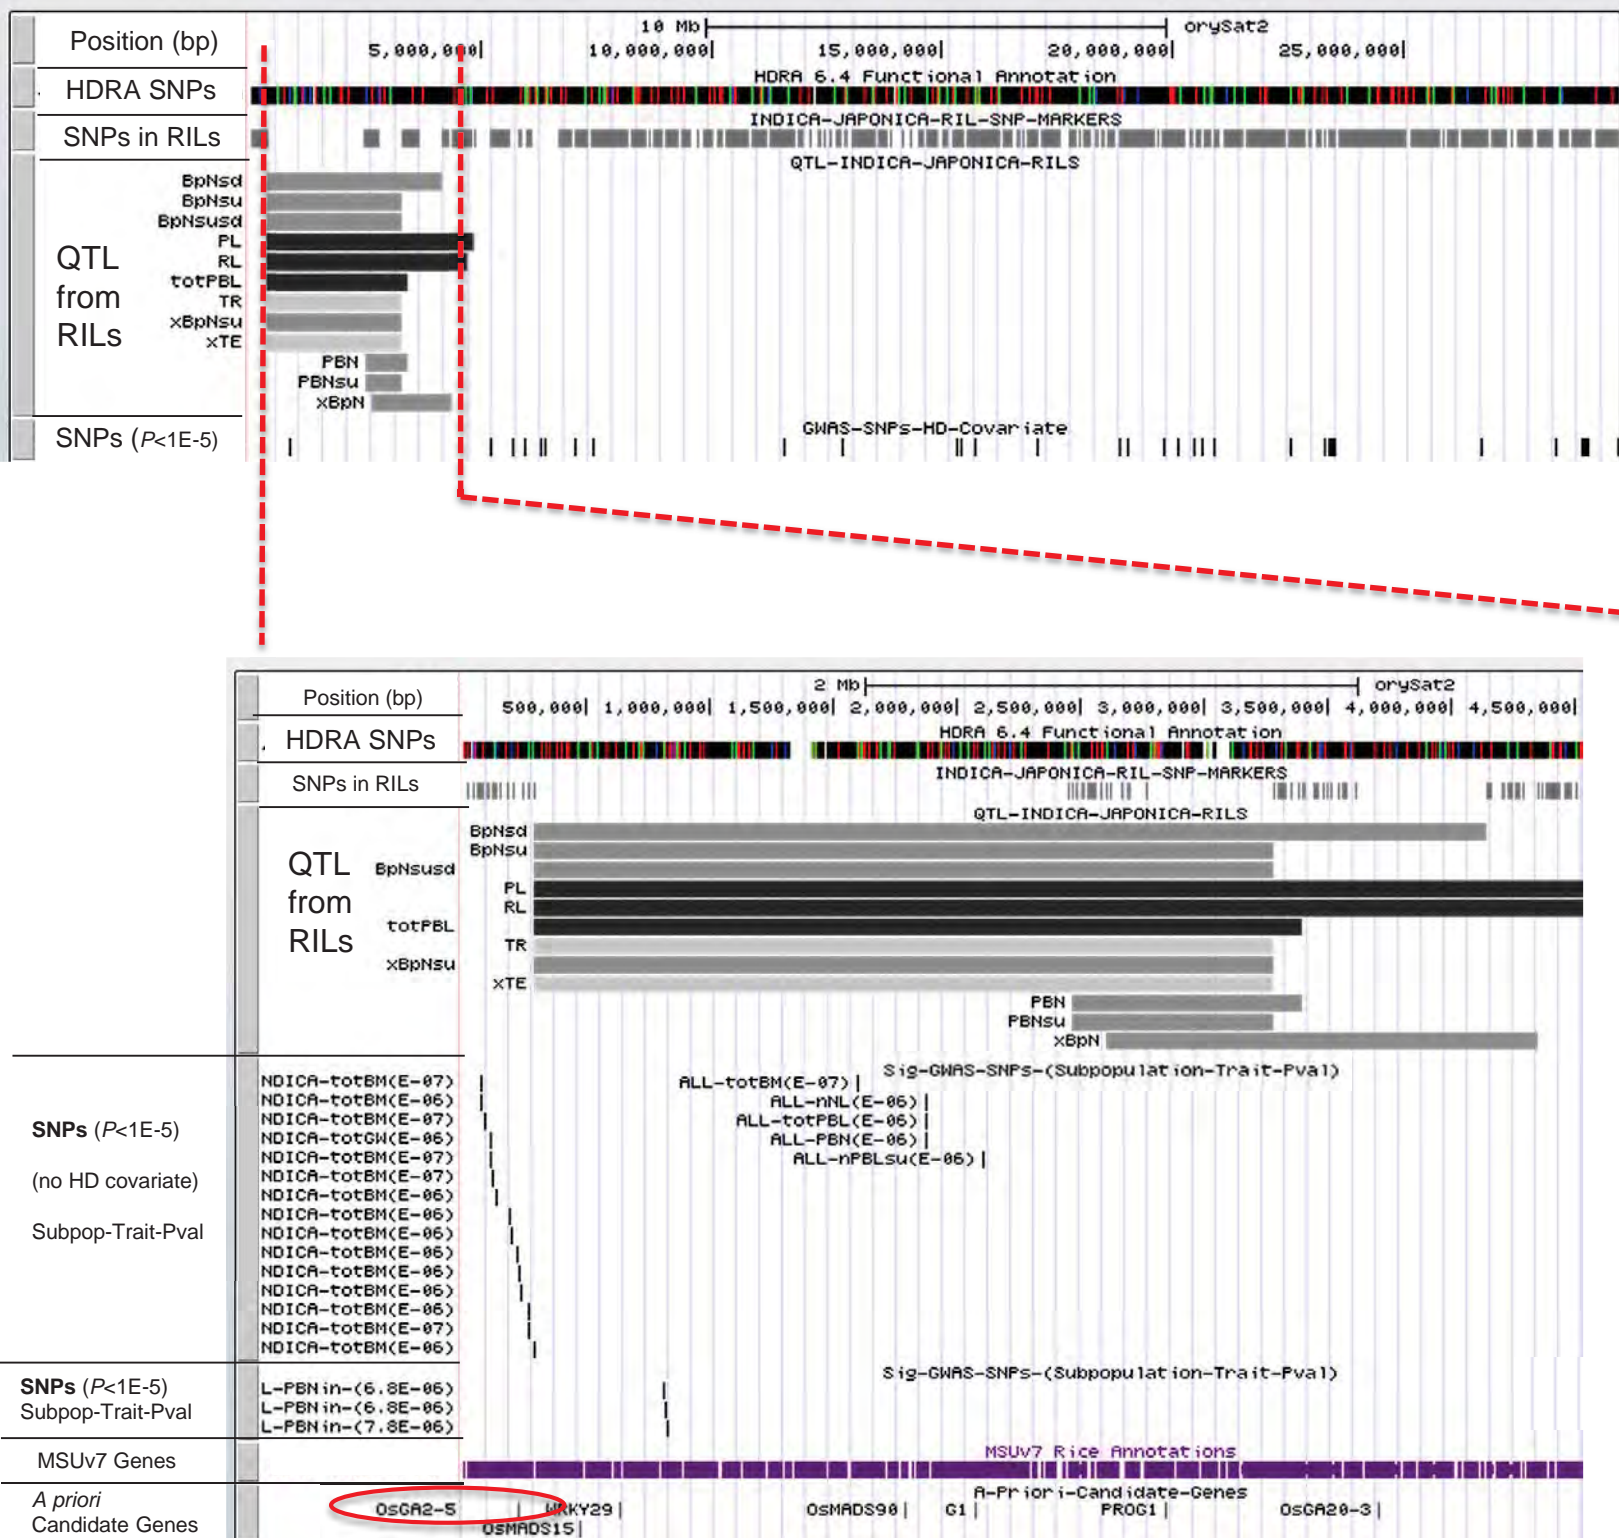

**Supplementary Figure 89. Chromosome 7 GWAS and QTL results.** Screenshots from the UCSC Browser with tracks depicting: high-density rice array (HDRA) SNPs; SNPs used in the recombinant inbred line (RIL) population; QTL identified for traits in the RILs; and significant SNPs associated with traits from the GWAS panel. The zoom in includes gene annotations from MSUv7, as well as *a priori* candidate genes from Supplementary Table 5. Candidates <30kb from a GWAS SNP are circled in red. Trait abbreviations correspond to Supplementary Table 2.

# Chromosome 8

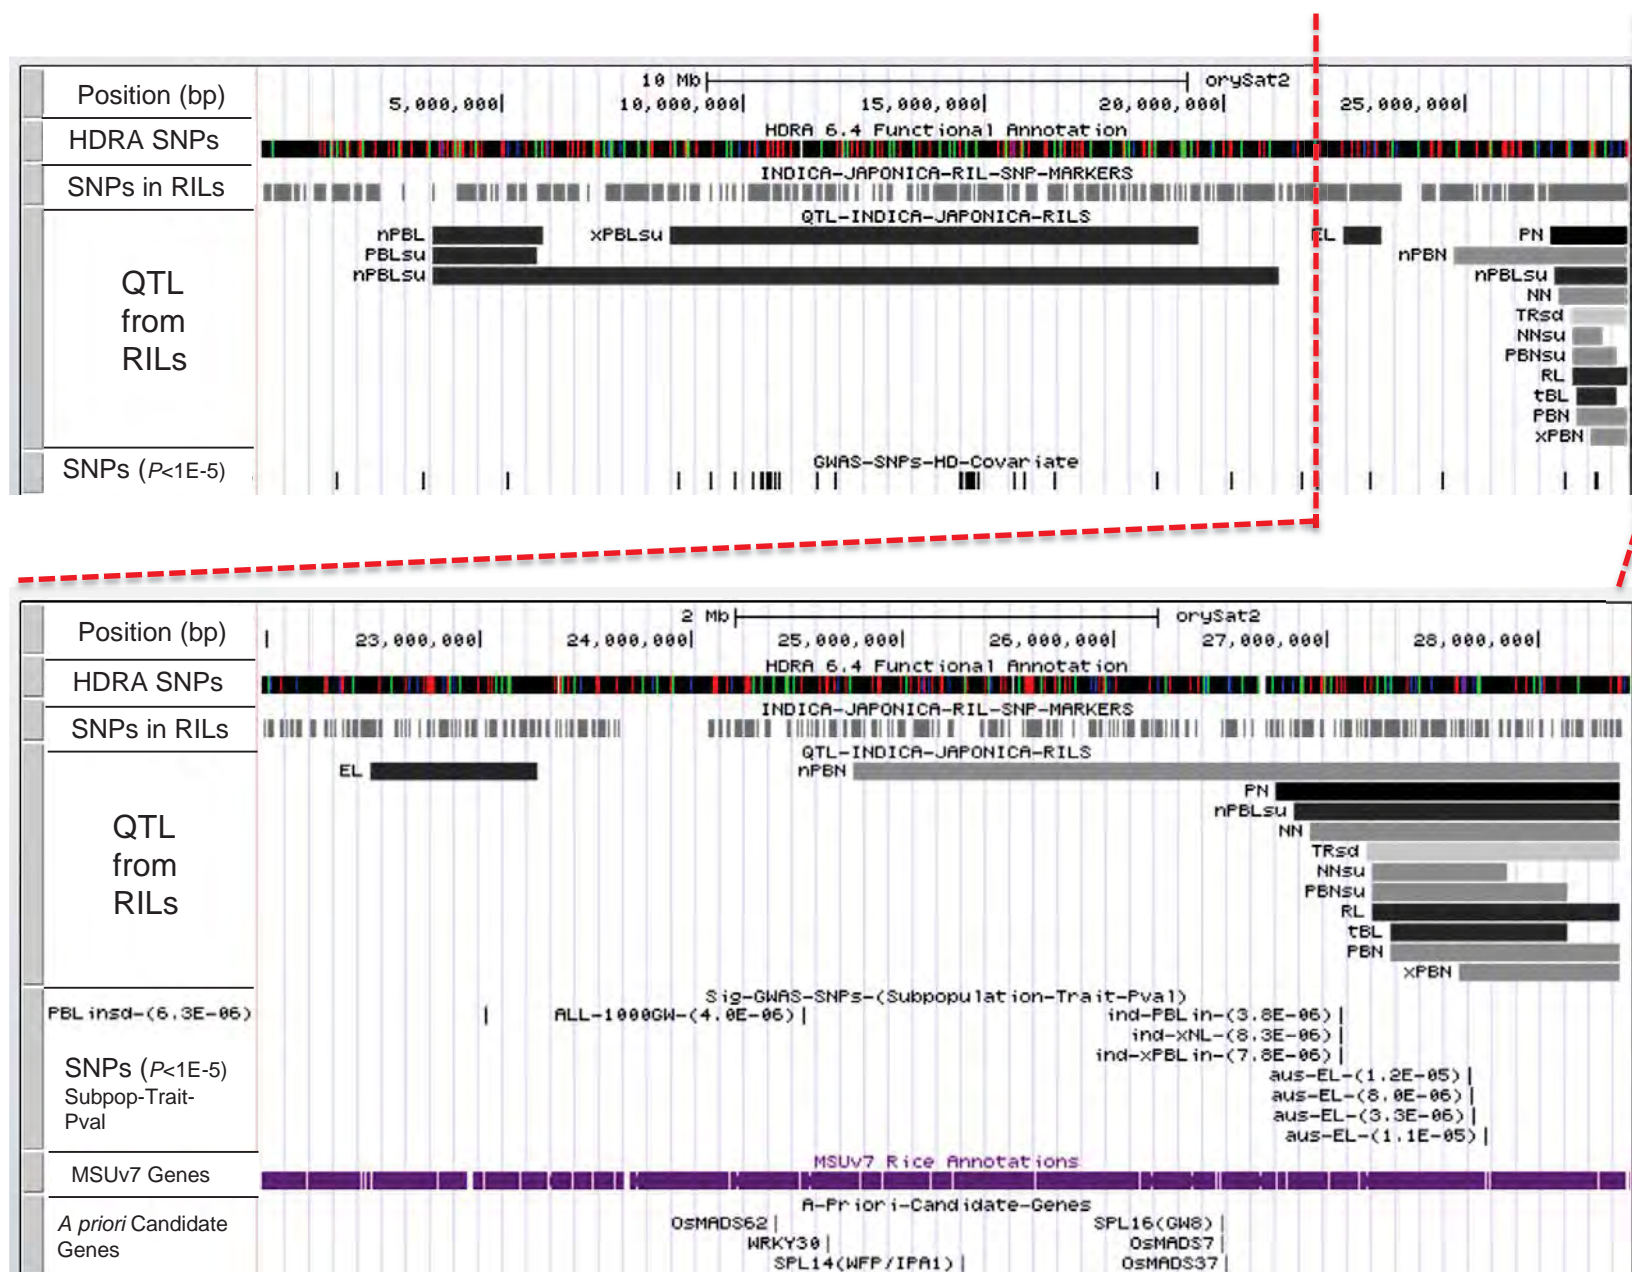

**Supplementary Figure 90. Chromosome 8 GWAS and QTL results.** Screenshots from the UCSC Browser with tracks depicting: high-density rice array (HDRA) SNPs; SNPs used in the recombinant inbred line (RIL) population; QTL identified for traits in the RILs; and significant SNPs associated with traits from the GWAS panel. The zoom in includes gene annotations from MSUv7, as well as *a priori* candidate genes from Supplementary Table 5. Candidates <30kb from a GWAS SNP are circled in red. Trait abbreviations correspond to Supplementary Table 2.



# Chromosome 9

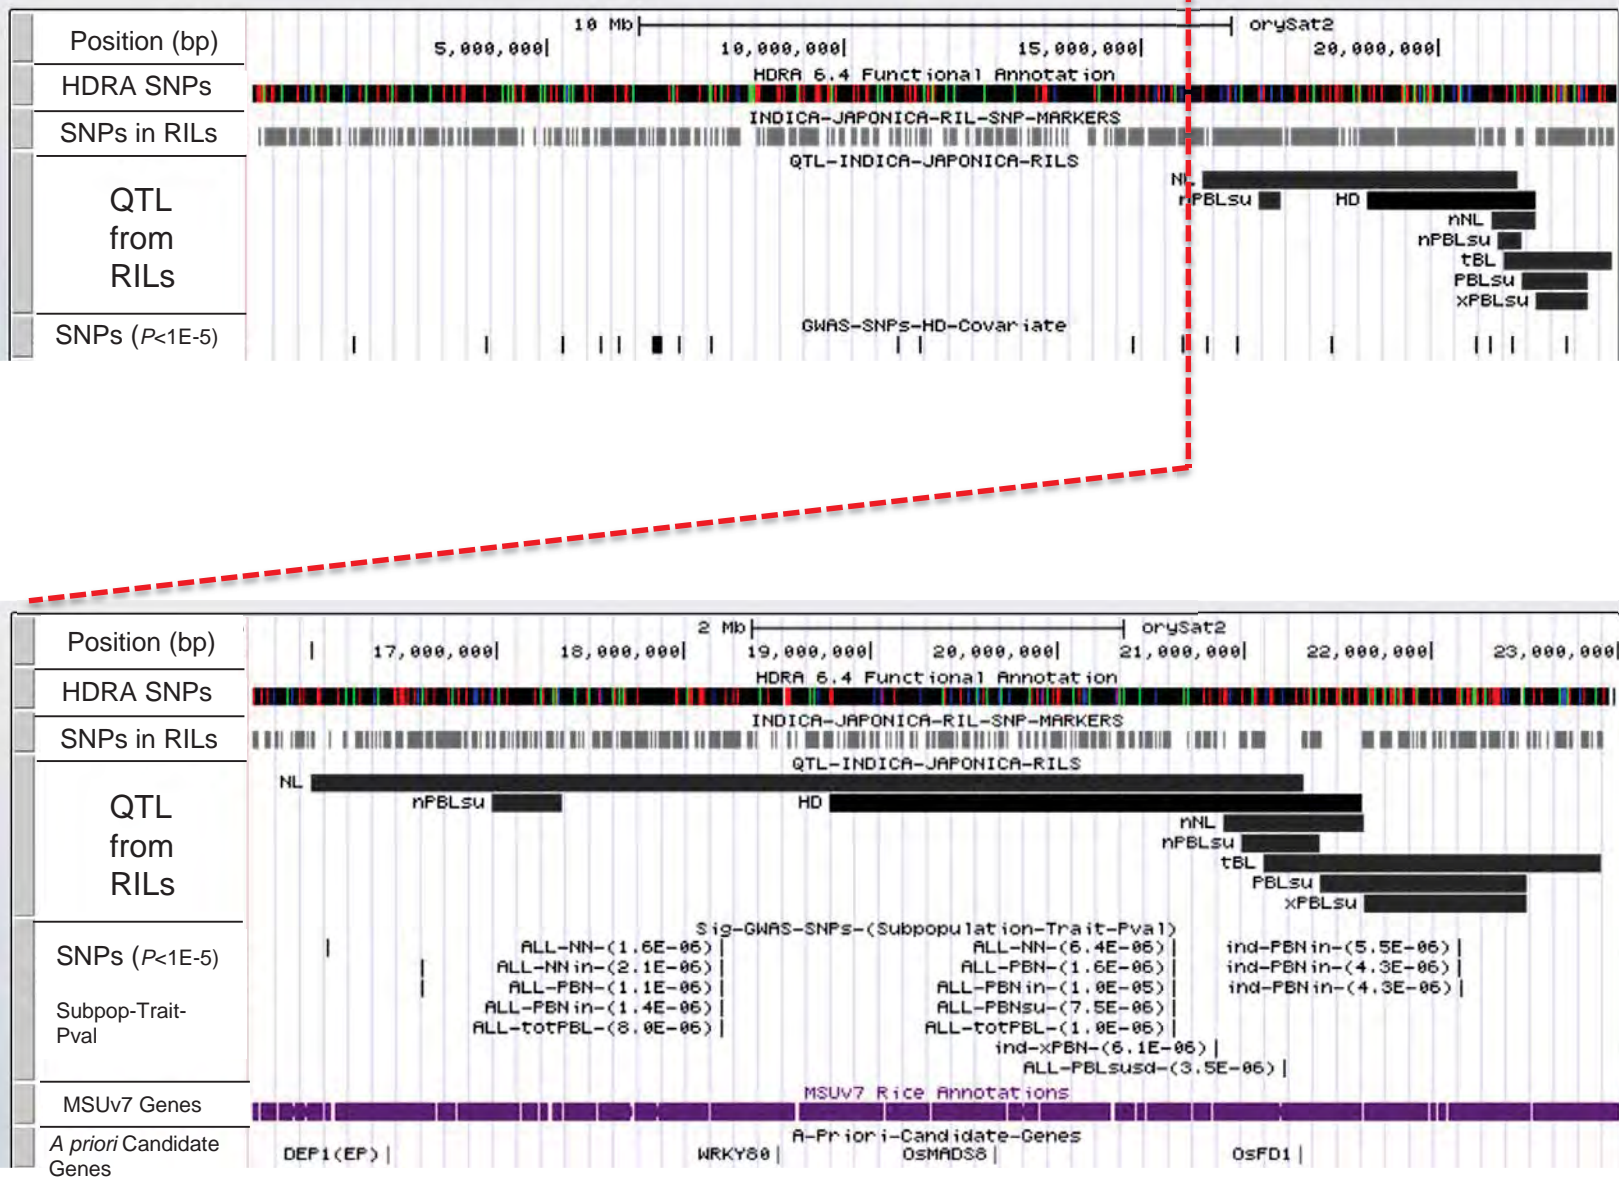

**Supplementary Figure 91. Chromosome 9 GWAS and QTL results.** Screenshots from the UCSC Browser with tracks depicting: high-density rice array (HDRA) SNPs; SNPs used in the recombinant inbred line (RIL) population; QTL identified for traits in the RILs; and significant SNPs associated with traits from the GWAS panel. The zoom in includes gene annotations from MSUv7, as well as *a priori* candidate genes from Supplementary Table 5. Candidates <30kb from a GWAS SNP are circled in red. Trait abbreviations correspond to Supplementary Table 2.



# Chromosome 10

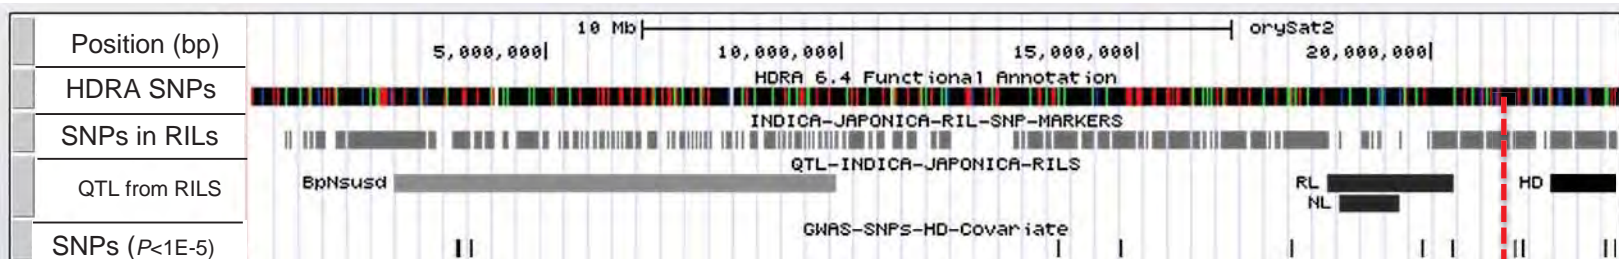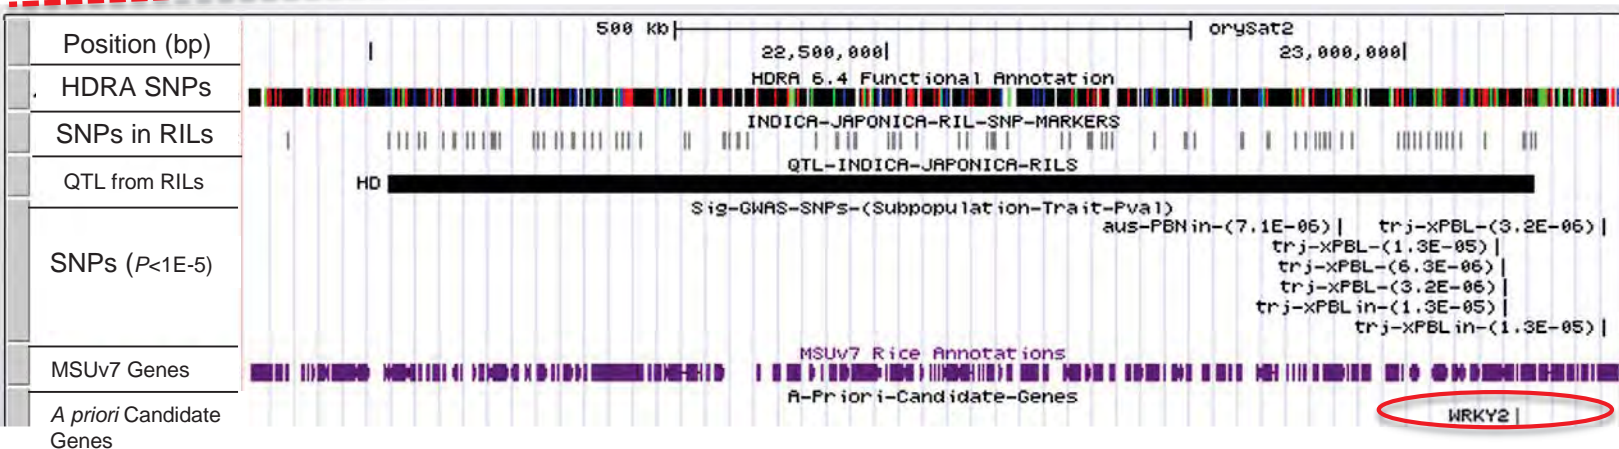

**Supplementary Figure 92. Chromosome 10 GWAS and QTL results.** Screenshots from the UCSC Browser with tracks depicting: high-density rice array (HDRA) SNPs; SNPs used in the recombinant inbred line (RIL) population; QTL identified for traits in the RILs; and significant SNPs associated with traits from the GWAS panel. The zoom in includes gene annotations from MSUv7, as well as *a priori* candidate genes from Supplementary Table 5. Candidates <30kb from a GWAS SNP are circled in red. Trait abbreviations correspond to Supplementary Table 2.

# Chromosome 11

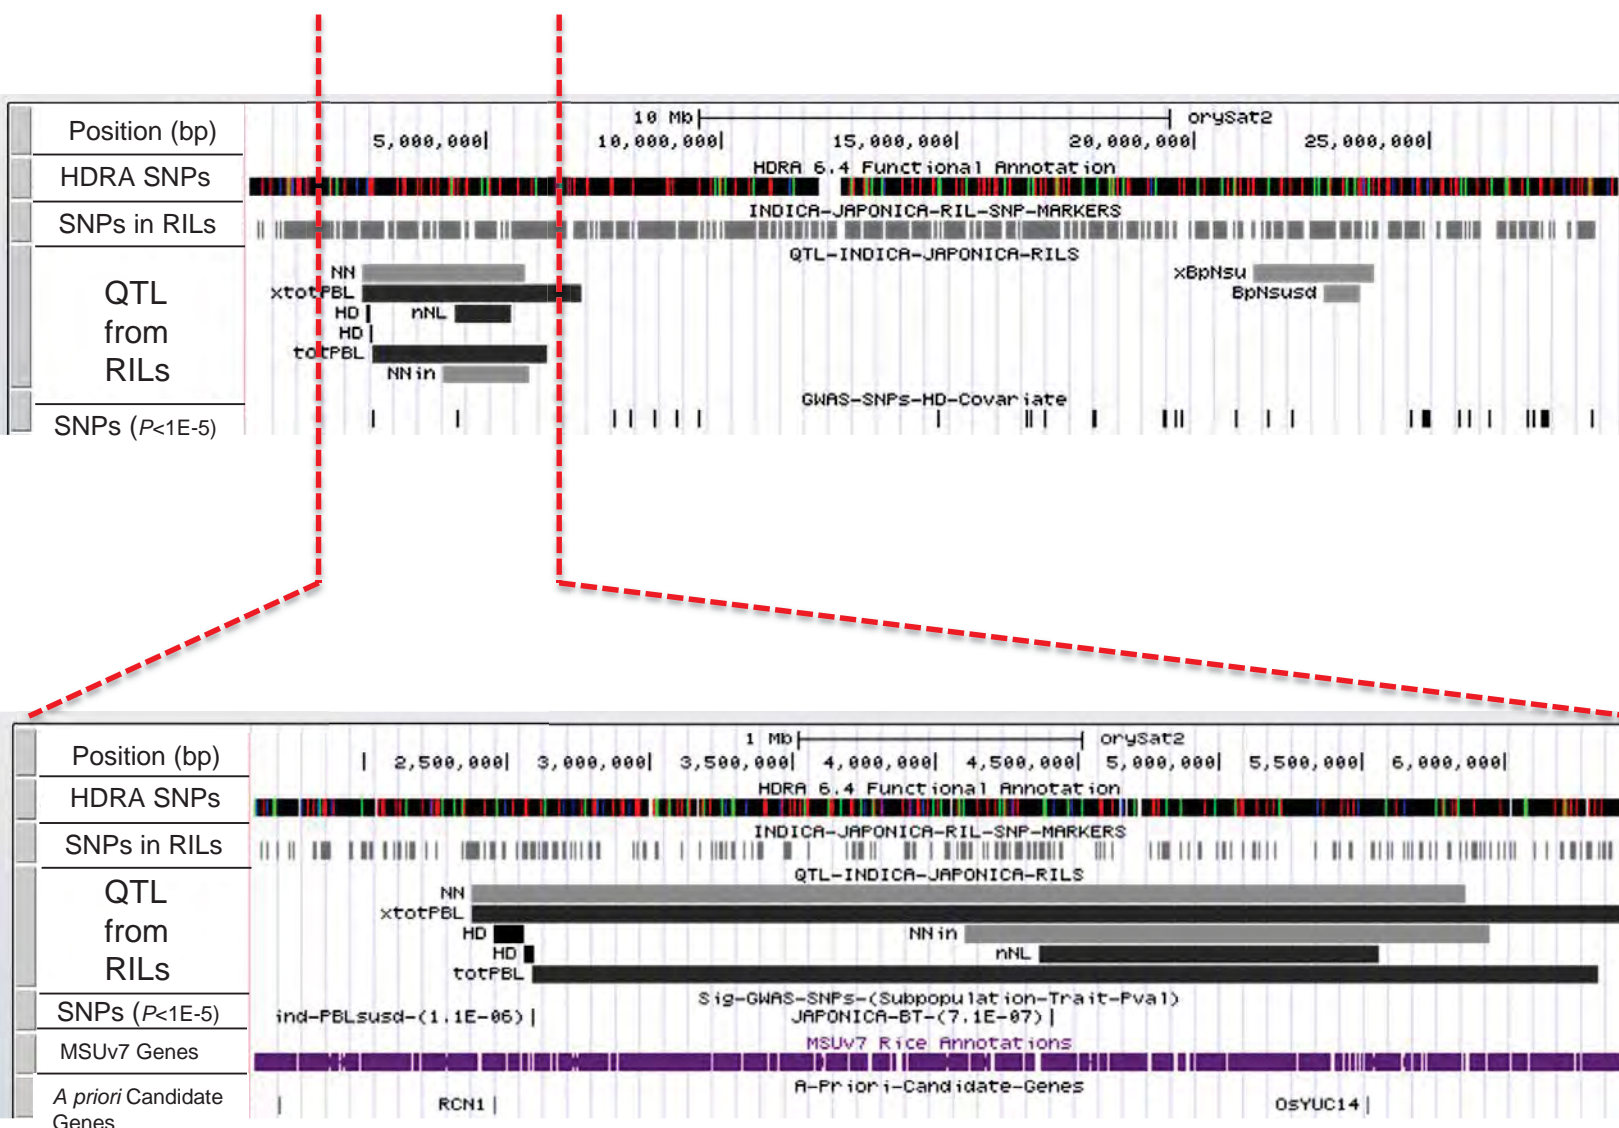

**Supplementary Figure 93. Chromosome 11 GWAS and QTL results.** Screenshots from the UCSC Browser with tracks depicting: high-density rice array (HDRA) SNPs; SNPs used in the recombinant inbred line (RIL) population; QTL identified for traits in the RILs; and significant SNPs associated with traits from the GWAS panel. The zoom in includes gene annotations from MSUv7, as well as *a priori* candidate genes from Supplementary Table 5. Candidates <30kb from a GWAS SNP are circled in red. Trait abbreviations correspond to Supplementary Table 2.

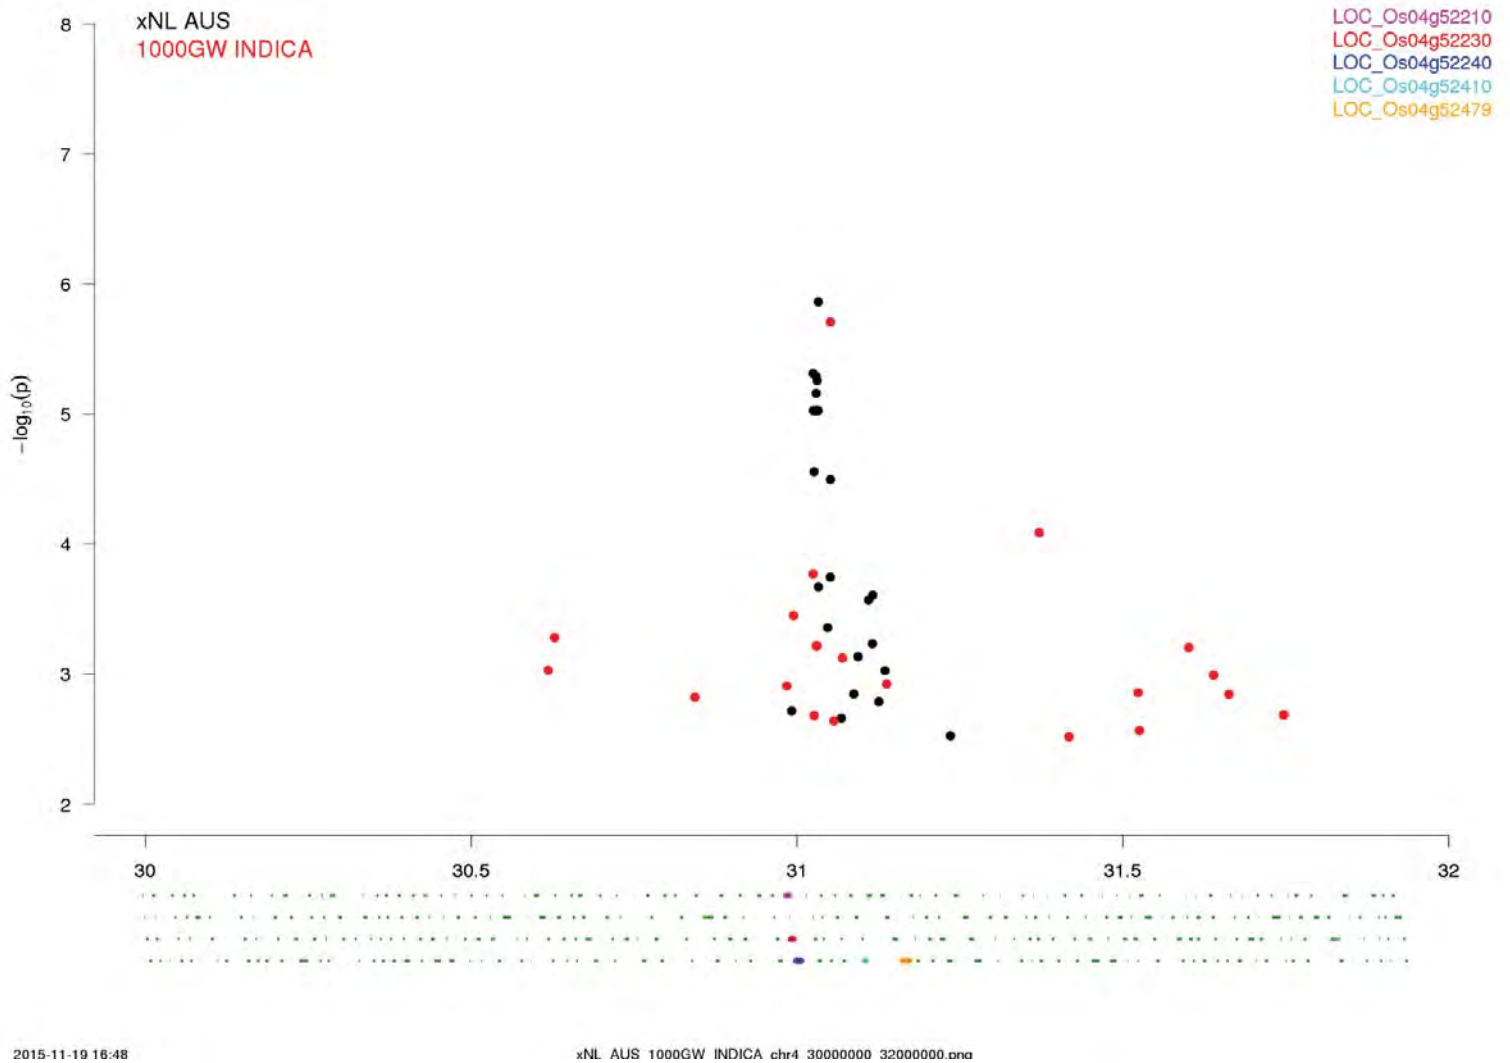

**Supplementary Figure 94: Composite Manhattan Plot for xNL and 1000GW on Chromosome 4.** Composite Manhattan Plot showing position of GWAS-QTL associated with maximum internode length (xNL) detected in the *aus* subpopulation (black) and 1000 grain weight (GW) detected in the *Indica* varietal group (*indica* + *aus*) (red) across a 2 Mb region between 30-32 Mb on chromosome 4; five candidate genes (*OsKS3*= LOC\_Os04g52210, *OsKS1*= LOC\_Os04g52230, *OsKS2*= LOC\_Os04g52240, *OsMADS31*= LOC\_Os04g52410, and *NAL1*= LOC\_Os04g52479) are highlighted as colored bars below the Manhattan plot; the candidate genes fall within the mega-locus where these two GWAS-QTL overlap with 14 NIL-QTLs (shown in Fig. 7).



Supplementary Tables

Supplementary Table 1. Germplasm comprising the GWAS diversity panel.

| GSaccno | HDRA_Sample_ID | IRGC_Name             | IRGC                  | Origin Country | Subpopulation    | Subspecies | Varieties with yield component data |
|---------|----------------|-----------------------|-----------------------|----------------|------------------|------------|-------------------------------------|
| 122128  | 122128         | Kakani 2              | KAKANI 2              | NPL            | Admixed          | -          | Y                                   |
| 121493  | 121493         | Sampog                | SAMPOG                | MYS            | Admixed          | -          |                                     |
| 121450  | 121450         | Neng Nah              | NENG NAH              | THA            | Admixed-Japonica | Japonica   | Y                                   |
| 121469  | 121469         | Peek                  | Peek                  | LAO            | Admixed-Japonica | Japonica   | Y                                   |
| 122004  | 122004         | Chay Loy Oe           | CHA LOY OE            | THA            | Admixed-Japonica | Japonica   | Y                                   |
| 121208  | 121208         | Khao Do Ngoi          | Khao do ngoi          | LAO            | Admixed-Japonica | Japonica   |                                     |
| 121386  | 121386         | Khao Mum              | KHAO' MUM             | THA            | Admixed-Japonica | Japonica   |                                     |
| 121405  | 121405         | Lai                   | LAI                   | THA            | Admixed-Japonica | Japonica   |                                     |
| 121444  | 121444         | Na Gui Zhan Gu        | NA GUI ZHAN GU        | CHN            | Admixed-Japonica | Japonica   |                                     |
| 121498  | 121498         | Seng                  | SENG                  | THA            | Admixed-Japonica | Japonica   |                                     |
| 121985  | 121985         | Boda 148-3            | BODA 148-3            | MAD            | Admixed-Japonica | Japonica   |                                     |
| 122130  | 122130         | Karasukara Surankasu  | KARASUKARA SURANKASU  | TWN            | Admixed-Japonica | Japonica   |                                     |
| 122281  | 122281         | Vietnam 1             | VIETNAM 1             | VNM            | Admixed-Japonica | Japonica   |                                     |
| 117266  | NSFTV651       | Dular                 | Dular                 | IND            | aus              | Indica     | Y                                   |
| 117605  | NSFTV13        | Basmati 1             | Basmati 1             | PAK            | aus              | Indica     | Y                                   |
| 117617  | NSFTV85        | Kasalath              | Kasalath              | IND            | aus              | Indica     | Y                                   |
| 117620  | NSFTV105       | Mehr                  | Mehr                  | IRN            | aus              | Indica     | Y                                   |
| 117661  | NSFTV18        | BJ1                   | BJ1                   | IND            | aus              | Indica     | Y                                   |
| 117673  | NSFTV228       | CA_902.B.2.1          | CA_902.B.2.1          | TCD            | aus              | Indica     | Y                                   |
| 117692  | NSFTV370       | Coarse                | Coarse                | PAK            | aus              | Indica     | Y                                   |
| 117697  | NSFTV314       | CTG 1516              | CTG_1516              | BGD            | aus              | Indica     | Y                                   |
| 117704  | NSFTV316       | DD 62                 | DD 62                 | BGD            | aus              | Indica     | Y                                   |
| 117711  | NSFTV317       | DJ 123                | DJ123                 | BGD            | aus              | Indica     | Y                                   |
| 117715  | NSFTV320       | DM 43                 | DM 43                 | BGD            | aus              | Indica     | Y                                   |
| 117726  | NSFTV345       | DZ 193                | DZ_193                | BGD            | aus              | Indica     | Y                                   |
| 117740  | NSFTV58        | Ghati Kamma Nangarhar | Ghati_Kamma_Nangarhar | AFG            | aus              | Indica     | Y                                   |
| 117741  | NSFTV326       | Ghorbhai              | Ghorbhai              | BGD            | aus              | Indica     | Y                                   |

| GSaccno | HDRA_Sample_ID | IRGC_Name         | IRGC              | Origin Country | Subpopulation | Subspecies | Varieties with yield component data |
|---------|----------------|-------------------|-------------------|----------------|---------------|------------|-------------------------------------|
| 117743  | NSFTV327       | Goria             | Goria             | BGD            | aus           | Indica     | Y                                   |
| 117747  | NSFTV262       | Halwa Gose Red    | Halwa Gose Red    | IRQ            | aus           | Indica     | Y                                   |
| 117765  | NSFTV328       | Jamir             | Jamir             | BGD            | aus           | Indica     | Y                                   |
| 117769  | NSFTV78        | Jhona 349         | Jhona349          | IND            | aus           | Indica     | Y                                   |
| 117772  | NSFTV329       | Kachilon          | Kachilon          | BGD            | aus           | Indica     | Y                                   |
| 117773  | NSFTV81        | Kalamkati         | Kalamkati         | IND            | aus           | Indica     | Y                                   |
| 117778  | NSFTV346       | Karkati 87        | Karkati_87        | BGD            | aus           | Indica     | Y                                   |
| 117783  | NSFTV331       | Khao Tot Long 227 | Khao Tot Long 227 | THA            | aus           | Indica     | Y                                   |
| 117847  | NSFTV336       | Paung Malaung     | Paung_Malaung     | BUR            | aus           | Indica     | Y                                   |
| 117850  | NSFTV131       | Phudugey          | Phudugey NSFTV131 | BTN            | aus           | Indica     | Y                                   |
| 117856  | NSFTV360       | PTB 30            | PTB_30 NSFTV360   | IND            | aus           | Indica     | Y                                   |
| 117878  | NSFTV369       | Sathi             | Sathi             | PAK            | aus           | Indica     | Y                                   |
| 117885  | NSFTV341       | Shirkati          | Shirkati          | AFG            | aus           | Indica     | Y                                   |
| 117899  | NSFTV359       | Surjamkuhi        | Surjamkuhi        | IND            | aus           | Indica     | Y                                   |
| 117903  | NSFTV153       | T 26              | T26               | IND            | aus           | Indica     | Y                                   |
| 120896  | 120896         | Biranj            | BIRANJ            | IND            | aus           | Indica     | Y                                   |
| 121013  | 121013         | Kasapur           | KASAPUR           | IND            | aus           | Indica     | Y                                   |
| 121078  | 121078         | Pankhiraj         | PANKHIRAJ         | BGD            | aus           | Indica     | Y                                   |
| 121114  | 121114         | Seenetti          | SEENETTI          | LKA            | aus           | Indica     | Y                                   |
| 121155  | 121155         | Weda Heenati      | WEDA HEENATI      | LKA            | aus           | Indica     | Y                                   |
| 120864  | 120864         | Angalais          | ANGALAIS          | SEN            | aus           | Indica     |                                     |
| 120920  | 120920         | Cross 4-244       | CROSS 4-244       | IND            | aus           | Indica     |                                     |
| 120931  | 120931         | Dhala Bagdar 2    | DHALA BAGDAR 2    | BGD            | aus           | Indica     |                                     |
| 121017  | 121017         | Kele Bardhan      | KELE BARDHAN      | IND            | aus           | Indica     |                                     |
| 121026  | 121026         | Koyra             | KOYRA             | BGD            | aus           | Indica     |                                     |
| 121060  | 121060         | Moyna Moti        | MOYNA MOTI        | BGD            | aus           | Indica     |                                     |
| 121335  | 121335         | Etym              | ETYM              | SUN            | aus           | Indica     |                                     |
| 117902  | NSFTV152       | T 1               | T 1               | IND            | aus           | Indica     |                                     |
| 117602  | NSFTV178       | ARC 6578          | ARC_6578          | IND            | aus           | Indica     |                                     |

| GSaccno | HDRA_Sample_ID | IRGC_Name       | IRGC            | Origin Country | Subpopulation | Subspecies | Varieties with yield component data |
|---------|----------------|-----------------|-----------------|----------------|---------------|------------|-------------------------------------|
| 117662  | NSFTV19        | Black Gora      | Black_Gora      | IND            | aus           | Indica     |                                     |
| 117834  | NSFTV200       | P737            | P 737           | PAK            | aus           | Indica     |                                     |
| 117877  | NSFTV246       | Saraya          | Saraya          | FJI            | aus           | Indica     |                                     |
| 117883  | NSFTV261       | Shim Balte      | Shim_Balte      | IRQ            | aus           | Indica     |                                     |
| 117779  | NSFTV276       | Kaukau          | Kaukau          | MLI            | aus           | Indica     |                                     |
| 117712  | NSFTV318       | DJ 24           | DJ_24           | BGD            | aus           | Indica     |                                     |
| 117714  | NSFTV319       | DK 12           | DK 12           | BGD            | aus           | Indica     |                                     |
| 117716  | NSFTV321       | DM 56           | DM 56           | BGD            | aus           | Indica     |                                     |
| 117717  | NSFTV322       | DM 59           | DM_59           | BGD            | aus           | Indica     |                                     |
| 117718  | NSFTV323       | DNJ 140         | DNJ 140         | BGD            | aus           | Indica     |                                     |
| 117724  | NSFTV324       | DV 123          | DV 123          | BGD            | aus           | Indica     |                                     |
| 121653  | NSFTV330       | Khao Pakh Maw   | Khao Pakh Maw   | THA            | aus           | Indica     |                                     |
| 117642  | NSFTV353       | ARC 10376       | ARC_10376       | IND            | aus           | Indica     |                                     |
| 117634  | NSFTV357       | 9524            | 9524            | IND            | aus           | Indica     |                                     |
| 117876  | NSFTV371       | Santhi Sufaid   | Santhi Sufaid   | PAK            | aus           | Indica     |                                     |
| 117896  | NSFTV372       | Sufaid          | Sufaid          | PAK            | aus           | Indica     |                                     |
| 117774  | NSFTV378       | Kalubala Vee    | Kalubala_Vee    | LKA            | aus           | Indica     |                                     |
| 117710  | NSFTV44        | Dhala Shaitta   | Dhala_Shaitta   | IND            | aus           | Indica     |                                     |
| 117725  | NSFTV49        | DV 85           | Dv85            | BGD            | aus           | Indica     |                                     |
| 117603  | NSFTV6         | ARC 7229        | ARC_7229        | IND            | aus           | Indica     |                                     |
| 117268  | NSFTV612       | IR 64           | IR64            | PHL            | indica        | Indica     | Y                                   |
| 117276  | NSFTV636       | Sadu Cho        | Sadu Cho        | KOR            | indica        | Indica     | Y                                   |
| 117447  | 117447         | Chitraj (DA 23) | CHITRAJ (DA 23) | BGD            | indica        | Indica     | Y                                   |
| 117460  | 117460         | DA 9            | DA 9            | BGD            | indica        | Indica     | Y                                   |
| 117478  | 117478         | Gie 57          | GIE 57          | VNM            | indica        | Indica     | Y                                   |
| 117559  | 117559         | Peta            | PETA            | IDN            | indica        | Indica     | Y                                   |
| 117587  | 117587         | TD 25           | TD 25           | THA            | indica        | Indica     | Y                                   |
| 117600  | NSFTV234       | Aijiaonante     | Aijiaonante     | CHN            | indica        | Indica     | Y                                   |
| 117623  | NSFTV313       | BR24            | BR24            | BGD            | indica        | Indica     | Y                                   |



| GSaccno | HDRA_Sample_ID | IRGC_Name               | IRGC                    | Origin Country | Subpopulation | Subspecies | Varieties with yield component data |
|---------|----------------|-------------------------|-------------------------|----------------|---------------|------------|-------------------------------------|
| 117625  | NSFTV299       | SML 242                 | SML_242                 | SUR            | indica        | Indica     | Y                                   |
| 117636  | NSFTV3         | Ai-Chiao-Hong           | Ai-Chiao-Hong           | CHN            | indica        | Indica     | Y                                   |
| 117671  | NSFTV21        | Byakkoku Y 5006 Seln    | Byakkoku Y 5006 Seln    | AUS            | indica        | Indica     | Y                                   |
| 117681  | NSFTV349       | Chang Ch'Sang Hsu Tao   | Chang_Ch'Sang_Hsu_Tao   | CHN            | indica        | Indica     | Y                                   |
| 117682  | NSFTV29        | Chau                    | Chau                    | VNM            | indica        | Indica     | Y                                   |
| 117684  | NSFTV30        | Chiem Chanh             | Chiem_Chanh             | VNM            | indica        | Indica     | Y                                   |
| 117691  | NSFTV35        | CO18                    | CO18                    | IND            | indica        | Indica     | Y                                   |
| 117703  | NSFTV315       | Dawebyan                | Dawebyan                | BUR            | indica        | Indica     | Y                                   |
| 117705  | NSFTV43        | Dee Geo Woo Gen         | Dee_Geo_Woo_Gen         | TWN            | indica        | Indica     | Y                                   |
| 117713  | NSFTV252       | Djimoron                | Djimoron                | GNB            | indica        | Indica     | Y                                   |
| 117728  | NSFTV241       | ECIA76-S89-1            | ECIA76-S89-1            | CUB            | indica        | Indica     | Y                                   |
| 117751  | NSFTV66        | Hsia-Chioh-Keh-Tu       | Hsia-Chioh-Keh-Tu       | TWN            | indica        | Indica     | Y                                   |
| 117753  | NSFTV231       | Hunan Early Dwarf No. 3 | Hunan Early Dwarf No. 3 | CHN            | indica        | Indica     | Y                                   |
| 117757  | NSFTV71        | IR 36                   | IR_36                   | PHL            | indica        | Indica     | Y                                   |
| 117763  | NSFTV74        | IRGA 409                | IRGA_409                | BRA            | indica        | Indica     | Y                                   |
| 117766  | NSFTV76        | Jaya                    | Jaya                    | IND            | indica        | Indica     | Y                                   |
| 117767  | NSFTV356       | JC 117                  | JC_117                  | IND            | indica        | Indica     | Y                                   |
| 117770  | NSFTV196       | JM 70                   | JM70                    | MLI            | indica        | Indica     | Y                                   |
| 117784  | NSFTV90        | Kiang-Chou-Chiu         | Kiang-Chou-Chiu         | TWN            | indica        | Indica     | Y                                   |
| 117829  | NSFTV119       | Oryzica Llanos 5        | Oryzica Llanos 5        | COL            | indica        | Indica     | Y                                   |
| 117837  | NSFTV123       | Pagaiyahan              | Pagaiyahan              | TWN            | indica        | Indica     | Y                                   |
| 117838  | NSFTV255       | Pai Hok Glutinous       | Pai Hok Glutinous       | HKG            | indica        | Indica     | Y                                   |
| 117841  | NSFTV126       | Pappaku                 | Pappaku                 | TWN            | indica        | Indica     | Y                                   |
| 117842  | NSFTV222       | Paraiba Chines Nova     | Paraiba Chines Nova     | BRA            | indica        | Indica     | Y                                   |
| 117848  | NSFTV129       | Peh-Kuh                 | Peh-Kuh                 | TWN            | indica        | Indica     | Y                                   |
| 117871  | NSFTV337       | Sabharaj                | Sabharaj                | BGD            | indica        | Indica     | Y                                   |
| 117881  | NSFTV142       | Shai-Kuh                | Shai-Kuh                | CHN            | indica        | Indica     | Y                                   |
| 117889  | NSFTV207       | Sigadis                 | Sigadis                 | IDN            | indica        | Indica     | Y                                   |
| 117891  | NSFTV148       | Sintane Diofor          | Sintane Diofor          | HVO            | indica        | Indica     | Y                                   |

| GSaccno | HDRA_Sample_ID | IRGC_Name               | IRGC                    | Origin Country | Subpopulation | Subspecies | Varieties with yield component data |
|---------|----------------|-------------------------|-------------------------|----------------|---------------|------------|-------------------------------------|
| 117894  | NSFTV208       | Slo 17                  | SLO_17                  | IND            | indica        | Indica     | Y                                   |
| 117898  | NSFTV269       | Sundensis               | Sundensis               | KAZ            | indica        | Indica     | Y                                   |
| 117901  | NSFTV235       | Sze Guen Zim            | Sze_Guen_Zim            | CHN            | indica        | Indica     | Y                                   |
| 117906  | NSFTV163       | Taducan                 | Taducan                 | PHL            | indica        | Indica     | Y                                   |
| 117911  | NSFTV209       | Tchiganga               | Tchibanga               | GAB            | indica        | Indica     | Y                                   |
| 117912  | NSFTV161       | Teqing                  | Teqing                  | CHN            | indica        | Indica     | Y                                   |
| 117915  | NSFTV162       | TKM 6                   | TKM6                    | IND            | indica        | Indica     | Y                                   |
| 117940  | NSFTV339       | Yodanya                 | Yodanya                 | BUR            | indica        | Indica     | Y                                   |
| 120904  | 120904         | Byat Kyar               | BYAT KYAR               | BUR            | indica        | Indica     | Y                                   |
| 120970  | 120970         | Hong Mi Dong Mao Zhan   | HONG MI DONG MAO ZHAN   | CHN            | indica        | Indica     | Y                                   |
| 120988  | 120988         | IR 77384-12-35-3-12-1-B | IR 77384-12-35-3-12-1-B | PHL            | indica        | Indica     | Y                                   |
| 121044  | 121044         | Ma Gui Zi He            | MA GU ZI HE             | CHN            | indica        | Indica     | Y                                   |
| 121663  | 121663         | Gajpati                 | GAJPATI                 | NPL            | indica        | Indica     | Y                                   |
| 120914  | 120914         | Chua Dau                | CHUA DAU                | CHN            | indica        | Indica     |                                     |
| 120952  | 120952         | Ea Houm                 | Ea houm                 | LAO            | indica        | Indica     |                                     |
| 121019  | 121019         | Khao Daw Tai            | KHAO DAW TAI            | THA            | indica        | Indica     |                                     |
| 121020  | 121020         | Khao Pon                | KHAO PON                | THA            | indica        | Indica     |                                     |
| 121045  | 121045         | Ma Waine Ohn            | MA WAINE OHN            | BUR            | indica        | Indica     |                                     |
| 121080  | 121080         | Pawhtun                 | PAWHTUN                 | BUR            | indica        | Indica     |                                     |
| 121087  | 121087         | Pinursigi               | PINURSIGI               | PHL            | indica        | Indica     |                                     |
| 121092  | 121092         | Qing Gu                 | QING GU                 | CHN            | indica        | Indica     |                                     |
| 121104  | 121104         | RTS 5                   | RTS 5                   | VNM            | indica        | Indica     |                                     |
| 121642  | 121642         | Som Cau 70A             | SOM CAU 70 A            | VNM            | indica        | Indica     |                                     |
| 121889  | 121889         | Pelita Janggut          | PELITA JANGGUT          | IDN            | indica        | Indica     |                                     |
| 124447  | AFY08610786    | Padi Oro                | PADI ORO                | IDN            | indica        | Indica     |                                     |
| 117619  | NSFTV102       | Leung Pratew            | Leung Pratew            | THA            | indica        | Indica     |                                     |
| 117814  | NSFTV106       | Minghui 63              | Minghui_63              | CHN            | indica        | Indica     |                                     |

| GSaccno | HDRA_Sample_ID | IRGC_Name           | IRGC                | Origin Country | Subpopulation      | Subspecies | Varieties with yield component data |
|---------|----------------|---------------------|---------------------|----------------|--------------------|------------|-------------------------------------|
| 117818  | NSFTV110       | Mudgo               | Mudgo               | IND            | indica             | Indica     |                                     |
| 117826  | NSFTV117       | O-Luen-Cheung       | O-Luen-Cheung       | TWN            | indica             | Indica     |                                     |
| 117840  | NSFTV125       | Pao-Tou-Hung        | Pao-Tou-Hung        | CHN            | indica             | Indica     |                                     |
| 117849  | NSFTV130       | Peh-Kuh-Tsao-Tu     | Peh-Kuh-Tsao-Tu     | TWN            | indica             | Indica     |                                     |
| 117859  | NSFTV132       | Rathuwee            | Rathuwee            | LKA            | indica             | Indica     |                                     |
| 117622  | NSFTV137       | RTS14               | RTS14               | VNM            | indica             | Indica     |                                     |
| 117880  | NSFTV141       | Seratoes Hari       | Seratoes_Hari       | IDN            | indica             | Indica     |                                     |
| 117888  | NSFTV145       | Short Grain         | Short Grain         | THA            | indica             | Indica     |                                     |
| 117907  | NSFTV156       | Taichung Native 1   | Taichung_Native_1   | TWN            | indica             | Indica     |                                     |
| 117944  | NSFTV172       | Zhenshan 2          | Zhenshan 2          | CHN            | indica             | Indica     |                                     |
| 117858  | NSFTV203       | Radin Ebos 33       | Radin_Ebos_33       | MYS            | indica             | Indica     |                                     |
| 117759  | NSFTV284       | IR-44595            | IR-44595            | NPL            | indica             | Indica     |                                     |
| 117893  | NSFTV294       | SL 22-613           | SL 22-613           | SLE            | indica             | Indica     |                                     |
| 117731  | NSFTV325       | EMATA A 16-34       | EMATA A 16-34       | BUR            | indica             | Indica     |                                     |
| 117685  | NSFTV348       | China 1039          | China_1039          | CHN            | indica             | Indica     |                                     |
| 117280  | NSFTV642       | Zhenshan 97B        | Zhenshan 97B        | CHN            | indica             | Indica     |                                     |
| 117271  | NSFTV643       | Minghui 63          | Minghui_63          | CHN            | indica             | Indica     |                                     |
| 117758  | NSFTV72        | IR 8                | IR_8                | PHL            | indica             | Indica     |                                     |
| 117768  | NSFTV77        | JC149               | JC149               | IND            | indica             | Indica     |                                     |
| 121923  | 121923         | Nep Me Hoa Binh     | NEP ME HOA BINH     | VNM            | temperate japonica | Japonica   | Y                                   |
| 121340  | 121340         | Gao Gan Da Nuo      | GAO GAN DA NUO      | CHN            | temperate japonica | Japonica   |                                     |
| 121924  | 121924         | Nep Vang Ong        | NEP VANG ONG        | VNM            | temperate japonica | Japonica   |                                     |
| 117264  | NSFTV174       | Azucena             | Azucena             | PHL            | tropical japonica  | Japonica   | Y                                   |
| 117272  | NSFTV108       | Moroberekan         | Moroberekan         | GIN            | tropical japonica  | Japonica   | Y                                   |
| 117517  | 117517         | Kinandang Patong    | KINANDANG PATONG    | PHL            | tropical japonica  | Japonica   | Y                                   |
| 117560  | 117560         | Pin Kaeo            | PIN KAEO            | THA            | tropical japonica  | Japonica   | Y                                   |
| 117599  | NSFTV242       | 27                  |                     | DOM            | tropical japonica  | Japonica   | Y                                   |
| 117607  | NSFTV24        | Carolina Gold       | CarolinaGold        | USA            | tropical japonica  | Japonica   | Y                                   |
| 117626  | NSFTV214       | Improved Bluebonnet | Improved Bluebonnet | HND            | tropical japonica  | Japonica   | Y                                   |



| GSaccno | HDRA_Sample_ID | IRGC_Name        | IRGC             | Origin Country | Subpopulation     | Subspecies | Varieties with yield component data |
|---------|----------------|------------------|------------------|----------------|-------------------|------------|-------------------------------------|
| 117629  | NSFTV384       | 318              |                  | TUR            | tropical japonica | Japonica   | Y                                   |
| 117632  | NSFTV176       | 583              |                  | ECU            | tropical japonica | Japonica   | Y                                   |
| 117664  | NSFTV183       | Boa Vista        | Boa_Vista        | SLV            | tropical japonica | Japonica   | Y                                   |
| 117693  | NSFTV396       | Cocodrie         | Cocodrie         | USA            | tropical japonica | Japonica   | Y                                   |
| 117698  | NSFTV37        | Cuba 65          | Cuba 65          | CUB            | tropical japonica | Japonica   | Y                                   |
| 117707  | NSFTV190       | Delrex           | Delrex           | USA            | tropical japonica | Japonica   | Y                                   |
| 117723  | NSFTV46        | Dourado Agulha   | Dourado_Agulha   | BRA            | tropical japonica | Japonica   | Y                                   |
| 117736  | NSFTV54        | Fortuna          | Fortuna          | USA            | tropical japonica | Japonica   | Y                                   |
| 117755  | NSFTV70        | Iguape Cateto    | Iguape_Cateto    | HTI            | tropical japonica | Japonica   | Y                                   |
| 117760  | NSFTV195       | IRAT 13          | IRAT_13          | CIV            | tropical japonica | Japonica   | Y                                   |
| 117762  | NSFTV226       | IRAT 44          | IRAT_44          | HVO            | tropical japonica | Japonica   | Y                                   |
| 117776  | NSFTV84        | Kaniranga        | Kaniranga        | IDN            | tropical japonica | Japonica   | Y                                   |
| 117786  | NSFTV92        | Kinastano        | Kinastano        | PHL            | tropical japonica | Japonica   | Y                                   |
| 117798  | NSFTV394       | Lady Wright Seln | Lady Wright Seln | USA            | tropical japonica | Japonica   | Y                                   |
| 117804  | NSFTV350       | Ligerito         | Ligerito         | COL            | tropical japonica | Japonica   | Y                                   |
| 117805  | NSFTV308       | Llanero 501      | Llanero 501      | VEN            | tropical japonica | Japonica   | Y                                   |
| 117835  | NSFTV122       | Padi Kasalle     | Padi_Kasalle     | IDN            | tropical japonica | Japonica   | Y                                   |
| 117843  | NSFTV201       | Pate Blanc Mn 1  | Pate_Blanc_Mn_1  | CIV            | tropical japonica | Japonica   | Y                                   |
| 117853  | NSFTV377       | PR 304           | PR 304           | PRI            | tropical japonica | Japonica   | Y                                   |
| 117854  | NSFTV202       | Pratao           | Pratao           | BRA            | tropical japonica | Japonica   | Y                                   |
| 117857  | NSFTV310       | R 101            | R 101            | ZAR            | tropical japonica | Japonica   | Y                                   |
| 117897  | NSFTV150       | Sultani          | Sultani          | EGY            | tropical japonica | Japonica   | Y                                   |
| 117914  | NSFTV258       | Tia Bura         | Tia_Bura         | IDN            | tropical japonica | Japonica   | Y                                   |
| 117920  | NSFTV285       | Tox 782-20-1     | Tox_782-20-1     | NGA            | tropical japonica | Japonica   | Y                                   |
| 117932  | NSFTV239       | WAB 502-13-4-1   | WAB_502-13-4-1   | CIV            | tropical japonica | Japonica   | Y                                   |
| 117935  | NSFTV213       | WC 3397          | WC 3397          | JAM            | tropical japonica | Japonica   | Y                                   |
| 121193  | 121193         | Bakung (H)       | BAKUNG (H)       | MYS            | tropical japonica | Japonica   | Y                                   |
| 121195  | 121195         | Dinolores        | DINOLORES        | PHL            | tropical japonica | Japonica   | Y                                   |
| 121635  | 121635         | Ranau Kadai      | RANAU KADAI      | MYS            | tropical japonica | Japonica   | Y                                   |

| GSaccno | HDRA_Sample_ID | IRGC_Name               | IRGC                    | Origin Country | Subpopulation     | Subspecies | Varieties with yield component data |
|---------|----------------|-------------------------|-------------------------|----------------|-------------------|------------|-------------------------------------|
| 121652  | NSFTV251       | H256-76-1-1-1           | H256-76-1-1-1           | ARG            | tropical japonica | Japonica   | Y                                   |
| 121905  | 121905         | Cina                    | CINA                    | IDN            | tropical japonica | Japonica   | Y                                   |
| 121926  | 121926         | Padi Teras              | PADI TERAS              | IDN            | tropical japonica | Japonica   | Y                                   |
| 121939  | 121939         | Ubak Bakong             | UBAK BAKONG             | MYS            | tropical japonica | Japonica   | Y                                   |
| 122052  | 122052         | Ganigi                  | GANIGI                  | IDN            | tropical japonica | Japonica   | Y                                   |
| 122095  | 122095         | IR 47686-09-01-B-1      | IR 47686-09-01-B-1      | PHL            | tropical japonica | Japonica   | Y                                   |
| 122108  | 122108         | IR 68704-145-1-1-B      | IR 68704-145-1-1-B      | PHL            | tropical japonica | Japonica   | Y                                   |
| 122120  | 122120         | IRAT 335                | IRAT 335                | BOL            | tropical japonica | Japonica   | Y                                   |
| 124490  | 124490         | Padi Kompai             | PADI KOMPAL             | IDN            | tropical japonica | Japonica   | Y                                   |
| 121385  | 121385         | Khao Kap Sang           | KHAO KAP SANG           | LAO            | tropical japonica | Japonica   |                                     |
| 121391  | 121391         | Kikilong                | KIKILONG                | MYS            | tropical japonica | Japonica   |                                     |
| 121475  | 121475         | Popong                  | POPONG                  | MYS            | tropical japonica | Japonica   |                                     |
| 121523  | 121523         | Toang                   | TOANG                   | IDN            | tropical japonica | Japonica   |                                     |
| 121672  | 121672         | MUT IAC 25-44-807       | MUT IAC 25-44-807       | GUY            | tropical japonica | Japonica   |                                     |
| 122031  | 122031         | Davao                   | DAVAO                   | PHL            | tropical japonica | Japonica   |                                     |
| 122063  | 122063         | Gogo                    | GOGO                    | IDN            | tropical japonica | Japonica   |                                     |
| 122134  | 122134         | Kendinga 5H             | KENDINGA 5 H            | MYS            | tropical japonica | Japonica   |                                     |
| 117830  | NSFTV120       | OS6                     | OS6                     | LBR            | tropical japonica | Japonica   |                                     |
| 117890  | NSFTV147       | Sinampaga Selection     | Sinampaga_Selection     | PHL            | tropical japonica | Japonica   |                                     |
| 117918  | NSFTV164       | Tondok                  | Tondok                  | IDN            | tropical japonica | Japonica   |                                     |
| 117921  | NSFTV165       | Trembese                | Trembese                | IDN            | tropical japonica | Japonica   |                                     |
| 117668  | NSFTV185       | British Honduras Creole | British_Honduras_Creole | BLZ            | tropical japonica | Japonica   |                                     |
| 117694  | NSFTV188       | Coppocina               | Coppocina               | BGR            | tropical japonica | Japonica   |                                     |
| 117934  | NSFTV212       | WC 2810                 | Wc 2810                 | FSM            | tropical japonica | Japonica   |                                     |
| 117936  | NSFTV215       | WC 4443                 | WC_4443                 | BOL            | tropical japonica | Japonica   |                                     |
| 117674  | NSFTV22        | Caawa/Fortuna 6-103-15  | Caawa/Fortuna_6-103-15  | TWN            | tropical japonica | Japonica   |                                     |
| 117855  | NSFTV223       | Priano Guaira           | Priano_Guaira           | BRA            | tropical japonica | Japonica   |                                     |
| 117675  | NSFTV23        | Canella De Ferro        | Canella_De_Ferro        | BRA            | tropical japonica | Japonica   |                                     |
| 117931  | NSFTV240       | Wab 501-11-5-1          | Wab 501-11-5-1          | CIV            | tropical japonica | Japonica   |                                     |

| GSaccno | HDRA_Sample_ID | IRGC_Name       | IRGC            | Origin Country | Subpopulation     | Subspecies | Varieties with yield component data |
|---------|----------------|-----------------|-----------------|----------------|-------------------|------------|-------------------------------------|
| 117836  | NSFTV274       | Padi Pagalong   | Padi_Pagalong   | MYS            | tropical japonica | Japonica   |                                     |
| 117874  | NSFTV280       | Saku            | Saku            | MNG            | tropical japonica | Japonica   |                                     |
| 117756  | NSFTV286       | IITA 135        | IITA 135        | NGA            | tropical japonica | Japonica   |                                     |
| 124372  | NSFTV309       | Manzano         | Manzano         | ZAR            | tropical japonica | Japonica   |                                     |
| 117678  | NSFTV342       | Cenit           | Cenit           | ARG            | tropical japonica | Japonica   |                                     |
| 117695  | NSFTV347       | Creole          | Creole          | BLZ            | tropical japonica | Japonica   |                                     |
| 117706  | NSFTV391       | Della           | Della           | USA            | tropical japonica | Japonica   |                                     |
| 117699  | NSFTV397       | Cybonnet        | Cybonnet        | USA            | tropical japonica | Japonica   |                                     |
| 117742  | NSFTV59        | Gogo Lempuk     | Gogo Lempuk     | IDN            | tropical japonica | Japonica   |                                     |
| 117761  | NSFTV73        | IRAT 177        | IRAT 177        | CIV            | tropical japonica | Japonica   |                                     |
| 117764  | NSFTV75        | Jambu           | Jambu           | IDN            | tropical japonica | Japonica   |                                     |
| 117816  | NSFTV770       | Mojito Colorado | Mojito Colorado | BOL            | tropical japonica | Japonica   |                                     |
| 117643  | NSFTV8         | Asse Y Pung     | Asse_Y_Pung     | PHL            | tropical japonica | Japonica   |                                     |
| 117796  | NSFTV99        | LAC 23          | LAC_23          | LBR            | tropical japonica | Japonica   |                                     |



Supplementary Table 2. List of phenotypes used for GWAS.

|        | Trait Name              | PANorama Software Trait Identifier                            | Unit        | Logarithmic Transformation | Agronomic vs. PANorama | Detailed Description of Trait Collection                                                                                                                                                                                                                                       |
|--------|-------------------------|---------------------------------------------------------------|-------------|----------------------------|------------------------|--------------------------------------------------------------------------------------------------------------------------------------------------------------------------------------------------------------------------------------------------------------------------------|
| HD     | Heading Date            | NA                                                            | days        | y                          | Agronomic              | Number of days after transplanting when ~50% of plants from a plot replicate show emerging panicles                                                                                                                                                                            |
| PH     | Plant Height            | NA                                                            | cm          | y                          | Agronomic              | Distance from base of the culm to the tip of the longest panicle                                                                                                                                                                                                               |
| PN     | Panicle Number          | NA                                                            | count       | -                          | Agronomic              | Number of reproductive tillers per plant                                                                                                                                                                                                                                       |
| BT     | Booting                 | NA                                                            | days        | y                          | Agronomic              | Number of days after transplanting when ~50% of plants from a plot replicate reach booting stage (visible flag leaf)                                                                                                                                                           |
| SBN    | Secondary Branch Number | NA                                                            | categorical | -                          | Agronomic              | Scored on a 0-4 scale. 0=no spikelets born on secondary branches; 1=25% spikelets born on secondary branches; 2=50% of spikelets born on secondary branches; 3=75% spikelets born on secondary branches; 4=100% of spikelets born on secondary branches in clustered formation |
| FLA    | Flag Leaf Area          | NA                                                            | mm squared  | y                          | Agronomic              | Scored using Li-Cor LI3100 leaf area meter                                                                                                                                                                                                                                     |
| totBM  | Total Shoot Biomass     | NA                                                            | grams       | -                          | Agronomic              | Dry shoot biomass; 5 plants amassed for replicate                                                                                                                                                                                                                              |
| PW     | Panicle Weight          | NA                                                            | grams       | -                          | Agronomic              | Total dry panicle weight; 5 plants amassed for replicate; corrected for seed moisture content                                                                                                                                                                                  |
| totGW  | Grain Weight            | NA                                                            | grams       | y                          | Agronomic              | Weight of threshed grains; 5 plants amassed for replicate; corrected for seed moisture content                                                                                                                                                                                 |
| 1000GW | 1000-Grain Weight       | NA                                                            | grams       | y                          | Agronomic              | Weight of 1000, randomly sampled grains; Counted from total grain weight; corrected for seed moisture content                                                                                                                                                                  |
| GN     | Grain Number            | NA                                                            | count       | y                          | Agronomic              | Total Grain Weight divided by 1000-grain weight                                                                                                                                                                                                                                |
| EL     | Exsertion Length        | LengthOfExtrusion (Initial Main Axis Point - Extrusion Point) | cm          | y                          | PANorama               | Distance from the flag leaf ligule to the panicle notch; Automatically implemented in PANorama (IMAP - EP)                                                                                                                                                                     |

|         |                                                                           |                                                                    |    |   |          |                                                                                                                                                                                                             |
|---------|---------------------------------------------------------------------------|--------------------------------------------------------------------|----|---|----------|-------------------------------------------------------------------------------------------------------------------------------------------------------------------------------------------------------------|
| RL      | Rachis Length                                                             | LengthOfMainAxis (Final Main Axis Point - Initial Main Axis Point) | cm | y | PANorama | Distance from the panicle notch to the inflorescence meristem abortion point; Automatically implemented in PANorama (FAMP-IMAP)                                                                             |
| PL      | Panicle Length                                                            | InflorescenceLengthcm                                              | cm | y | PANorama | Distance from the panicle notch to the tip of the terminal panicle primary branch; Automatically implemented in PANorama, when IMAP is selected at the panicle notch.                                       |
| tBL     | Tip Branch Length                                                         | NA                                                                 | cm | - | PANorama | Length of the terminal primary branch; PL-RL                                                                                                                                                                |
| NL      | Internode Length                                                          | MeanLengthBetweenNodescm                                           | cm | y | PANorama | The distance between two nodes, after collapsing of primary branches. NL is the average length of all internodes in an image.                                                                               |
| NLsd    | Internode Length Standard Deviation                                       | StdevLengthBetweenNodescm                                          | cm | y | PANorama | The standard deviation of NL.                                                                                                                                                                               |
| xNL     | Maximum Internode Length                                                  | MaxLengthBetweenNodescm                                            | cm | y | PANorama | The maximum distance between two nodes within a panicle, after primary branches have been collapsed.                                                                                                        |
| nNL     | Minimum Internode Length                                                  | MinLengthBetweenNodescm                                            | cm | y | PANorama | The minimum distance between two nodes within a panicle, after primary branches have been collapsed.                                                                                                        |
| PBL     | Primary Branch Length                                                     | MeanLengthOfPrimaryBranchescm                                      | cm | - | PANorama | The distance from the first pixel in a primary branch to neighbor the rachis skeleton, to the 8- neighbor pixel at the tip of a terminal seed. PBL is the average of all primary branches within a panicle. |
| PBLsd   | Primary Branch Length Standard Deviation                                  | StdevLengthOfPrimaryBranchescm                                     | cm | - | PANorama | The standard deviation of MeanLengthOfPrimaryBranches.                                                                                                                                                      |
| xPBL    | Maximum Primary Branch Length                                             | MaxLengthOfPrimaryBranchescm                                       | cm | - | PANorama | The maximum length of a primary branch within a panicle.                                                                                                                                                    |
| nPBL    | Minimum Primary Branch Length                                             | MinLengthOfPrimaryBranchescm                                       | cm | - | PANorama | The minimum length of a primary branch within a panicle.                                                                                                                                                    |
| PBLin   | Primary Branch Length in the Lower Half of the Panicle                    | MeanLengthOfPrimaryBranchesInInferiorSlabcm                        | cm | - | PANorama | The average length of all primary branches below the JP.                                                                                                                                                    |
| PBLinsd | Primary Branch Length in the Lower Half of the Panicle Standard Deviation | StdevLengthOfPrimaryBranchesInInferiorSlabcm                       | cm | - | PANorama | The standard deviation of all primary branch lengths within a panicle below the JP.                                                                                                                         |

|        |                                                                           |                                              |    |   |          |                                                                                                                                                                                                                                                                                                                                                                                                                   |
|--------|---------------------------------------------------------------------------|----------------------------------------------|----|---|----------|-------------------------------------------------------------------------------------------------------------------------------------------------------------------------------------------------------------------------------------------------------------------------------------------------------------------------------------------------------------------------------------------------------------------|
| xPBLin | Maximum Primary Branch Length in the Lower Half of the Panicle            | MaxLengthOfPrimaryBranchesInInferiorSlabcm   | cm | - | PANorama | The maximum length of a primary branch within a panicle below the JP.                                                                                                                                                                                                                                                                                                                                             |
| nPBLin | Minimum Primary Branch Length in the Lower Half of the Panicle            | MinLengthOfPrimaryBranchesInInferiorSlabcm   | cm | - | PANorama | The minimum length of a primary branch within a panicle below the JP.                                                                                                                                                                                                                                                                                                                                             |
| PBLsu  | Primary Branch Length in the Upper Half of the Panicle                    | MeanLengthOfPrimaryBranchesInSuperiorSlabcm  | cm | - | PANorama | The average length of all primary branches above the JP.                                                                                                                                                                                                                                                                                                                                                          |
| PBLsud | Primary Branch Length in the Upper Half of the Panicle Standard Deviation | StdevLengthOfPrimaryBranchesInSuperiorSlabcm | cm | - | PANorama | The standard deviation of all primary branch lengths within a panicle above the JP.                                                                                                                                                                                                                                                                                                                               |
| xPBLsu | Maximum Primary Branch Length in the Upper Half of the Panicle            | MaxLengthOfPrimaryBranchesInSuperiorSlabcm   | cm | - | PANorama | The maximum length of a primary branch within a panicle above the JP.                                                                                                                                                                                                                                                                                                                                             |
| nPBLsu | Minimum Primary Branch Length in the Upper Half of the Panicle            | MinLengthOfPrimaryBranchesInSuperiorSlabcm   | cm | - | PANorama | The minimum length of a primary branch within a panicle above the JP.                                                                                                                                                                                                                                                                                                                                             |
| TR     | Thickness of the Rachis                                                   | MeanThicknessOfMaixiscm                      | cm | - | PANorama | Thickness is calculated as 2x the distance between a skeleton point and its closest pixel on the image contour. Distances are obtained directly from the Euclidean distance map of the panicle mask during the skeletonization step. MeanThicknessOfMainAxis is the average of all thickness measures between the IMAP and FMAP. In rice, these points are selected to reflect mean thickness of the rachis (TR). |
| TRsd   | Thickness of the Rachis Standard Deviation                                | StdevThicknessOfMaixiscm                     | cm | - | PANorama | The standard deviation of TR.                                                                                                                                                                                                                                                                                                                                                                                     |
| xTR    | Maximum Thickness of Rachis                                               | MaxThicknessOfMaixiscm                       | cm | - | PANorama | The maximum thickness between the IMAP and the FMAP.                                                                                                                                                                                                                                                                                                                                                              |



|       |                                                        |                                       |       |   |          |                                                                                                                                                                                                                                                                                                                                                                                                                                                                                                                                                     |
|-------|--------------------------------------------------------|---------------------------------------|-------|---|----------|-----------------------------------------------------------------------------------------------------------------------------------------------------------------------------------------------------------------------------------------------------------------------------------------------------------------------------------------------------------------------------------------------------------------------------------------------------------------------------------------------------------------------------------------------------|
| TE    | Thickness of Exertion                                  | MeanThicknessOfExtrusioncm            | cm    | - | PANorama | Thickness is calculated as 2x the distance between a skeleton point and its closest pixel on the image contour. Distances are obtained directly from the Euclidean distance map of the panicle mask during the skeletonization step. MeanThicknessOfExtrusion is the average of all thickness measures between the EP and IMAP. In rice, these points are selected to reflect mean thickness of exertion (TE).                                                                                                                                      |
| TEsd  | Thickness of Exertion Standard Deviation               | StdevThicknessOfExtrusioncm           | cm    | - | PANorama | The standard deviation of TE.                                                                                                                                                                                                                                                                                                                                                                                                                                                                                                                       |
| xTE   | Maximum Thickness of Exertion                          | MaxThicknessOfExtrusioncm             | cm    | - | PANorama | The maximum of all thickness measures between the EP and the IMAP. In rice, these points are selected to reflect max thickness of exertion (xTE).                                                                                                                                                                                                                                                                                                                                                                                                   |
| nTE   | Minimum Thickness of Exertion                          | MinThicknessOfExtrusioncm             | cm    | - | PANorama | The minimum of all thickness measures between the EP and the IMAP. In rice, these points are selected to reflect min thickness of exertion (nTE).                                                                                                                                                                                                                                                                                                                                                                                                   |
| PBN   | Primary Branch Number                                  | NumberOfPrimaryBranches               | count | y | PANorama | A primary branch is any distinct skeleton segment that attaches (i.e. shares a neighboring pixel with the main axis) between the IMAP and FMAP. The MINBRANCSZ parameter within iftPANorama.h defines the minimum length requirement of a primary branch.                                                                                                                                                                                                                                                                                           |
| PBNsu | Primary Branch Number in the Upper Half of the Panicle | NumberOfPrimaryBranchesInSuperiorSlab | count | y | PANorama | Number of primary branches above the JP.                                                                                                                                                                                                                                                                                                                                                                                                                                                                                                            |
| PBNin | Primary Branch Number in the Lower Half of the Panicle | NumberOfPrimaryBranchesInInferiorSlab | count | y | PANorama | Number of primary branches below the JP.                                                                                                                                                                                                                                                                                                                                                                                                                                                                                                            |
| NN    | Internode Number                                       | NumberOfNodesOnMainaxis               | count | - | PANorama | Nodes are defined as anywhere a meristem transition has occurred. The pixels at which primary branches attach are considered nodes. If a branch forms at the IMAP and FMAP, they are also treated as nodes. Branches that attach within a specified distance of one another are automatically collapsed into a single internode point using the MINJCTDIST parameter in iftPANorama.h, and the pixel closest to the geometric center of the cluster is considered the true internode point. NN is defined as the total number of nodes in an image. |

|         |                                                                                              |                                            |       |   |          |                                                                                                                                                                                                                                                                        |
|---------|----------------------------------------------------------------------------------------------|--------------------------------------------|-------|---|----------|------------------------------------------------------------------------------------------------------------------------------------------------------------------------------------------------------------------------------------------------------------------------|
| NNsu    | Internode Number in the Upper Half of the Panicle                                            | NumberOfNodesOnMaixisInSuperiorSlab        | count | - | PANorama | Number of nodes above the JP.                                                                                                                                                                                                                                          |
| NNin    | Internode Number in the Lower Half of the Panicle                                            | NumberOfNodesOnMaixisInInferiorSlab        | count | - | PANorama | Number of nodes below the JP.                                                                                                                                                                                                                                          |
| BpN     | Number of Primary Branches per Internode                                                     | MeanNumberOfBranchesPerNode                | count | y | PANorama | BpN is the average number of branches per node for all nodes within a panicle. Branches are collapsed into single nodes using the MINJCTDIST parameter in iftPANorama.h, and the pixel closest to the geometric center of the cluster is considered the true node.     |
| BpNsd   | Number of Primary Branches per Internode Standard Deviation                                  | StdevNumberOfBranchesPerNode               | count | - | PANorama | The standard deviation when calculating NumberOfBranchesPerNode.                                                                                                                                                                                                       |
| BpNsu   | Number of Primary Branches per Internode in the Upper Half of the Panicle                    | MeanNumberOfBranchesPerNodeInSuperiorSlab  | count | y | PANorama | Number of branches per internode above the JP.                                                                                                                                                                                                                         |
| BpNusd  | Number of Primary Branches per Internode in the Upper Half of the Panicle Standard Deviation | StdevNumberOfBranchesPerNodeInSuperiorSlab | count | y | PANorama | The standard deviation when calculating BpNsu.                                                                                                                                                                                                                         |
| BpNin   | Number of Primary Branches per Internode in the Lower Half of the Panicle                    | MeanNumberOfBranchesPerNodeInInferiorSlab  | count | y | PANorama | Number of branches per internode below the JP.                                                                                                                                                                                                                         |
| BpNinsd | Number of Primary Branches per Internode in the Lower Half of the Panicle Standard Deviation | StdevNumberOfBranchesPerNodeInInferiorSlab | count | - | PANorama | The standard deviation when calculation BpNin.                                                                                                                                                                                                                         |
| xBpN    | Maximum Number of Primary Branches per Internode                                             | MaxNumberOfBranchesPerNode                 | count | - | PANorama | xBpN is the maximum number of branches to occur at a single node within a panicle. Branches are collapsed into single nodes using the MINJCTDIST parameter in iftPANorama.h, and the pixel closest to the geometric center of the cluster is considered the true node. |

|          |                                                                                   |                                          |       |   |          |                                                                                                                                                                         |
|----------|-----------------------------------------------------------------------------------|------------------------------------------|-------|---|----------|-------------------------------------------------------------------------------------------------------------------------------------------------------------------------|
| xBpNsu   | Maximum Number of Primary Branches per Internode in the Upper Half of the Panicle | MaxNumberOfBranchesPerNodeInSuperiorSlab | count | y | PANorama | xBpN above the JP.                                                                                                                                                      |
| xBpNin   | Maximum Number of Primary Branches per Internode in the Lower Half of the Panicle | MaxNumberOfBranchesPerNodeInInferiorSlab | count | y | PANorama | xBpN below the JP.                                                                                                                                                      |
| totPBL   | Total Primary Branch Length                                                       | NA                                       | cm    | y | PANorama | The sum of all primary branches, averaged for all panicles in an accession; Calculated from the PANorama ExtraPanicleMeasures.csv file                                  |
| xPBN     | Maximum Primary Branch Number                                                     | NA                                       | count | - | PANorama | The maximum number of panicle branches among all panicle replicates for an accession; Calculated from the PANorama ExtraPanicleMeasures.csv file                        |
| xtotPBL  | Maximum Total Primary Branch Length                                               | NA                                       | cm    | y | PANorama | The maximum sum length of all primary panicle branches among all panicle replicates for an accession; Calculated from the PANorama ExtraPanicleMeasures.csv file        |
| nPBN     | Minimum Primary Branch Number                                                     | NA                                       | count | y | PANorama | The minimum number of panicle branches among all panicle replicates for a line; Calculated from the PANorama ExtraPanicleMeasures.csv file                              |
| ntotPBL  | Minimum Total Primary Branch Length                                               | NA                                       | cm    | y | PANorama | The minimum sum length of all primary panicle branches among all panicle replicates for an accession; Calculated from the PANorama ExtraPanicleMeasures.csv file        |
| PBNsd    | Primary Branch Number Standard Deviation                                          | NA                                       | count | y | PANorama | The standard deviation for primary panicle branch number among all panicles in an accession; Calculated from the PANorama ExtraPanicleMeasures.csv file                 |
| totPBLsd | Total Primary Branch Length Standard Deviation                                    | NA                                       | cm    | y | PANorama | The standard deviation of the sum length of all primary panicle branches among all panicles in an accession; Calculated from the PANorama ExtraPanicleMeasures.csv file |

**Notes:**

1. To collect PANorama phenotypes, five panicles per plot were randomly harvested from different but genetically identical plants and photographed.



2. Plant height and panicle number were measured on five randomly selected plants per plot replicate. Vegetative and reproductive plant matter was amassed per plot and dried in ovens. Dry samples were used to calculate total biomass, panicle weight, and grain weight traits.
3. Panicle weight, grain weight, and total grain weight were corrected by moisture content. Grain moisture percentage was measured using a digital grain moisture tester. Seeds from dry panicle samples were amassed, tested three times, and the percent moisture content was averaged. The following equation was used to correct total weight measurements:  $\text{Weight measurement} * [1 - (\text{Average\%Moisture}/100)]$
4. Secondary branch number and flag leaf area traits using the same randomly harvested panicles used in PANorama imaging. For secondary branch number, the average categorical score per panicle (0-4) was calculated using every primary branch.
5. The PANorama Software Trait Identifier Column indicates how traits are labeled within the PANorama 2.0 software package.
6. EP (Exsertion Point), IMAP (Initial Main Axis Point), and FMAP (Final Main Axis Point) are selected for every image using a graphical user interface within PANorama 2.0. Junction Point (JP) is defined by the MINFSTJCTLEN parameter within the iftPANorama.h file. In order to calculate traits in the upper and lower halves of the panicle, the parameter was set to 0.5 (i.e. one-half).

**Supplementary Table 3. GWAS results for panicle traits.**

| <b>Subpopulation</b> | <b>Mixed model</b> | <b>Mixed Model + HD</b> | <b>Mixed Model + HD + NL</b> | <b>Mixed Model + HD + PBL</b> | <b>Mixed Model + HD + PBN</b> | <b>Mixed Model + HD + RL</b> |
|----------------------|--------------------|-------------------------|------------------------------|-------------------------------|-------------------------------|------------------------------|
| All                  | 709 (358)          | 496 (256)               | 283 (196)                    | 376 (251)                     | 445 (198)                     | 477 (258)                    |
| aus                  | 148 (52)           | 117 (44)                | 111 (60)                     | 52 (42)                       | 89 (56)                       | 82 (60)                      |
| indica               | 48 (38)            | 54 (39)                 | 57 (45)                      | 57 (48)                       | 95 (76)                       | 51 (46)                      |
| tropical japonica    | 132 (41)           | 49 (24)                 | 50 (29)                      | 44 (22)                       | 96 (45)                       | 70 (41)                      |
| Total associations   | 1037 (489)         | 716 (363)               | 501 (330)                    | 529 (363)                     | 725 (375)                     | 680 (405)                    |

The number of significant peaks is in parentheses, and is defined by binning significant SNPs using a sliding window of linkage disequilibrium (LD). Covariate abbreviations are as follows: heading date (HD); internode length (NL); primary branch length (PBL); primary branch number (PBN); rachis length (RL).

**Supplementary Table 4. Overlap between panicle trait GWAS results.**

| <b>Proportion of shared GWAS results</b>                                          | <b>Mixed Model + HD + RL</b> | <b>Mixed Model + HD + NL</b> | <b>Mixed Model + HD + PBN</b> | <b>Mixed Model + HD + PBL</b> |
|-----------------------------------------------------------------------------------|------------------------------|------------------------------|-------------------------------|-------------------------------|
| <u>Number of SNPs shared with HD run</u> Total number of SNPs identified in run   | 537/682 (78.7%)              | 422/501 (84.2%)              | 546/725 (75.3%)               | 439/529 (83%)                 |
| <u>Number of peaks shared with HD run</u> Total number of peaks identified in run | 292/405 (72.1%)              | 259/330 (78.5%)              | 236/375 (62.9%)               | 285/363 (78.5%)               |

The number of significant peaks is defined by binning significant SNPs using a sliding window of linkage disequilibrium (LD). Percentage of overlap between each covariate and the HD covariate is indicated in parentheses. Covariate abbreviations are as follows: heading date (HD); internode length (NL); primary branch length (PBL); primary branch number (PBN); rachis length (RL).



**Supplementary Table 5. QTL identified in the RIL population.**

| Trait Name                                                                                   | Trait Acronym | Chr | Peak (cM) | Peak Marker | Left Marker, Right Marker   | PVE   | LOD   | Add. Eff.                   |
|----------------------------------------------------------------------------------------------|---------------|-----|-----------|-------------|-----------------------------|-------|-------|-----------------------------|
| Maximum Number of Primary Branches per Internode in the Upper Half of the Panicle            | xBpNsu        | 1   | 26.78     | S1_5015805  | S1_4826553,<br>S1_18455172  | 5.68  | 3.84  | -0.04*                      |
| Number of Primary Branches per Internode in the Upper Half of the Panicle Standard Deviation | BpNsusd       | 1   | 26.78     | S1_5015819  | S1_4978128,<br>S1_5261761   | 5.76  | 4.46  | -0.04*                      |
| Number of Primary Branches per Internode in the Upper Half of the Panicle                    | BpNsu         | 1   | 74.27     | S1_12555138 | S1_4978128,<br>S1_18455172  | 9.21  | 4.67  | -0.04 <sup>pp</sup>         |
| Minimum Internode Length                                                                     | nNL           | 1   | 157.41    | S1_30018773 | S1_26869417,<br>S1_31817994 | 6.41  | 3.77  | -0.04*                      |
| Internode Length Standard Deviation                                                          | NLsd          | 1   | 189.65    | S1_37521762 | S1_36389924,<br>S1_39320602 | 17.51 | 7.02  | -0.16cm <sup>pp</sup>       |
| Internode Length                                                                             | NL            | 1   | 190.56    | S1_37780914 | S1_35032514,<br>S1_38150186 | 22.2  | 14.09 | -0.06*                      |
| Maximum Internode Length                                                                     | xNL           | 1   | 190.56    | S1_37780914 | S1_36953664,<br>S1_38150306 | 20.2  | 8.23  | -0.52cm <sup>pp</sup>       |
| Thickness of the Rachis                                                                      | TR            | 1   | 191.47    | S1_37946665 | S1_34874035,<br>S1_38996012 | 7.92  | 3.88  | -<br>0.0021cm <sup>pp</sup> |
| Panicle Length                                                                               | PL            | 1   | 192.69    | S1_38150186 | S1_37370036,<br>S1_38642939 | 18.08 | 8.05  | -1.71cm                     |
| Rachis Length                                                                                | RL            | 1   | 193.01    | S1_38383505 | S1_38372528,<br>S1_38397011 | 7.73  | 6.2   | -1.62cm                     |
| Rachis Length                                                                                | RL            | 1   | 193.01    | S1_38411487 | S1_38410392,<br>S1_38412702 | 7.73  | 6.2   | -1.62cm                     |
| Exsertion Length                                                                             | EL            | 1   | 193.32    | S1_38527519 | S1_38116619,<br>S1_38642939 | 18.04 | 10.91 | -1.21cm <sup>pp</sup>       |
| Maximum Exsertion Thickness                                                                  | xTE           | 1   | 195.73    | S1_38690482 | S1_35764131,<br>S1_38996012 | 8.8   | 4.81  | -0.01cm <sup>pp</sup>       |

| <b>Trait Name</b>                                                                            | <b>Trait Acronym</b> | <b>Chr</b> | <b>Peak (cM)</b> | <b>Peak Marker</b> | <b>Left Marker, Right Marker</b> | <b>PVE</b> | <b>LOD</b> | <b>Add. Eff.</b>            |
|----------------------------------------------------------------------------------------------|----------------------|------------|------------------|--------------------|----------------------------------|------------|------------|-----------------------------|
| Number of Primary Branches per Internode in the Lower Half of the Panicle                    | BpNin                | 1          | 207.04           | S1_40263574        | S1_39800289,<br>S1_42108167      | 15.22      | 6.68       | 0.1np                       |
| Heading Date                                                                                 | HD                   | 1          | 209.76           | S1_40706234        | S1_40468832,<br>S1_40838070      | 9.11       | 8.47       | -4.71<br>days <sup>np</sup> |
| Number of Primary Branches per Internode                                                     | BpN                  | 1          | 210.66           | S1_40792028        | S1_39989656,<br>S1_42432186      | 17.35      | 7.61       | 0.02*                       |
| Number of Primary Branches per Internode Standard Deviation                                  | BpNsd                | 1          | 210.66           | S1_40792028        | S1_39910384,<br>S1_40896859      | 11.21      | 6.61       | 0.06                        |
| Number of Primary Branches per Internode in the Lower Half of the Panicle Standard Deviation | BpNinsd              | 1          | 216.44           | S1_41271407        | S1_39989656,<br>S1_42256041      | 14.95      | 5.91       | 0.09                        |
| Primary Branch Number                                                                        | PBN                  | 1          | 220.09           | S1_42038034        | S1_40596824,<br>S1_42256041      | 5.5        | 3.94       | 0.8                         |
| Primary Branch Number in the Lower Half of the Panicle                                       | PBNin                | 1          | 220.69           | S1_42050495        | S1_41133234,<br>S1_42256041      | 16.15      | 7.8        | 0.72                        |
| Maximum Number of Primary Branches per Internode in the Lower Half of the Panicle            | xBpNin               | 1          | 220.69           | S1_42050495        | S1_39989656,<br>S1_42256041      | 16.95      | 7.44       | 0.22                        |
| Maximum Number of Primary Branches per Internode                                             | xBpN                 | 1          | 220.99           | S1_42054294        | S1_39989656,<br>S1_42171085      | 10.1       | 6.92       | 0.17                        |
| Maximum Primary Branch Number                                                                | xPBN                 | 1          | 223.43           | S1_42197808        | S1_41172542,<br>S1_43076281      | 9.95       | 5.54       | 0.72                        |
| Maximum Number of Primary Branches per Internode                                             | xBpN                 | 2          | 42.35            | S2_5425842         | S2_4910917,<br>S2_6638269        | 6.32       | 4.48       | 0.13                        |
| Number of Primary Branches per Internode Standard Deviation                                  | BpNsd                | 2          | 42.49            | S2_5466966         | S2_4908277,<br>S2_6638269        | 7.39       | 4.49       | 0.05                        |

| Trait Name                                                                        | Trait Acronym | Chr | Peak (cM) | Peak Marker | Left Marker, Right Marker   | PVE   | LOD   | Add. Eff.                |
|-----------------------------------------------------------------------------------|---------------|-----|-----------|-------------|-----------------------------|-------|-------|--------------------------|
| Maximum Number of Primary Branches per Internode in the Lower Half of the Panicle | xBpNin        | 2   | 44.47     | S2_5592612  | S2_4982707,<br>S2_6638269   | 8.94  | 4.11  | 0.15                     |
| Panicle Number                                                                    | PN            | 2   | 65.16     | S2_10189314 | S2_6749562,<br>S2_11101262  | 12.66 | 5.29  | 1.37                     |
| Minimum Exsertion Thickness                                                       | nTE           | 2   | 123.71    | S2_24587075 | S2_22561101,<br>S2_25420045 | 14.55 | 6.17  | -0.01cm <sup>pp</sup>    |
| Minimum Exsertion Thickness                                                       | nTE           | 3   | 4.56      | S3_1007975  | S3_867099,<br>S3_1681663    | 8.31  | 3.65  | 0.01cm <sup>pp</sup>     |
| Maximum Total Primary Branch Length                                               | xtoPBL        | 3   | 4.86      | S3_1033363  | S3_665284,<br>S3_1989193    | 9.06  | 4.19  | 10.77cm                  |
| Heading Date                                                                      | HD            | 3   | 6.07      | S3_1174570  | S3_1033363,<br>S3_1529264   | 14.85 | 12.96 | -4.53 days <sup>pp</sup> |
| Maximum Exsertion Thickness                                                       | xTE           | 3   | 17.26     | S3_2546716  | S3_1938374,<br>S3_3204141   | 7.92  | 4.36  | 0.01cm <sup>pp</sup>     |
| Total Primary Branch Length                                                       | totPBL        | 3   | 18.16     | S3_2615175  | S3_955311,<br>S3_3204141    | 8.92  | 4.65  | 6.91cm                   |
| Maximum Primary Branch Length in the Upper Half of the Panicle                    | xPBLsu        | 3   | 43.32     | S3_5602318  | S3_5310718,<br>S3_27782699  | 7.82  | 4.06  | 0.04*                    |
| Minimum Internode Length                                                          | nNL           | 3   | 95.3      | S3_15829528 | S3_15551732,<br>S3_16438463 | 12.63 | 7.08  | 0.07*                    |
| Internode Number                                                                  | NN            | 3   | 95.3      | S3_15829528 | S3_15474234,<br>S3_22775738 | 12.09 | 6.1   | -0.65                    |
| Internode Number in the Lower Half of the Panicle                                 | NNin          | 3   | 95.3      | S3_15829528 | S3_14937446,<br>S3_27698909 | 10.36 | 4.63  | -0.4                     |
| Minimum Primary Branch Number                                                     | nPBN          | 3   | 98.02     | S3_16066102 | S3_15454097,<br>S3_27693150 | 11.72 | 5.08  | -1.09 <sup>pp</sup>      |
| Internode Number in the Upper Half of the Panicle                                 | NNsu          | 3   | 111.07    | S3_20968119 | S3_16658639,<br>S3_23048829 | 4.1   | 4.1   | -0.26                    |



| Trait Name                                                                                   | Trait Acronym | Chr | Peak (cM) | Peak Marker | Left Marker, Right Marker   | PVE   | LOD   | Add. Eff.               |
|----------------------------------------------------------------------------------------------|---------------|-----|-----------|-------------|-----------------------------|-------|-------|-------------------------|
| Minimum Primary Branch Length                                                                | nPBL          | 3   | 142.28    | S3_26493127 | S3_25325717,<br>S3_29541959 | 8.21  | 3.82  | 0.05*                   |
| Internode Length                                                                             | NL            | 3   | 143.79    | S3_26730228 | S3_14655869,<br>S3_29281809 | 5.14  | 3.78  | 0.03*                   |
| Primary Branch Number in the Upper Half of the Panicle                                       | PBNsu         | 3   | 145.92    | S3_27147027 | S3_26714008,<br>S3_27698909 | 9.84  | 6.08  | -0.04*                  |
| Number of Primary Branches per Internode Standard Deviation                                  | BpNsd         | 3   | 146.52    | S3_27206391 | S3_26805000,<br>S3_27646885 | 8.83  | 5.3   | -0.04                   |
| Maximum Number of Primary Branches per Internode                                             | xBpN          | 3   | 146.52    | S3_27206391 | S3_26805000,<br>S3_27574658 | 6.71  | 4.74  | -0.13                   |
| Primary Branch Number                                                                        | PBN           | 3   | 146.59    | S3_27287420 | S3_26805000,<br>S3_27693150 | 8.83  | 6.12  | -0.84                   |
| Number of Primary Branches per Internode in the Upper Half of the Panicle Standard Deviation | BpNsd         | 3   | 147.43    | S3_27441141 | S3_26805000,<br>S3_27698909 | 15.3  | 10.82 | -0.04*                  |
| Maximum Number of Primary Branches per Internode in the Upper Half of the Panicle            | xBpNsu        | 3   | 147.43    | S3_27498202 | S3_26805000,<br>S3_27698909 | 13.04 | 8.28  | -0.04*                  |
| Number of Primary Branches per Internode in the Upper Half of the Panicle                    | BpNsu         | 3   | 147.43    | S3_27514086 | S3_26805000,<br>S3_28601847 | 10.61 | 5.33  | -0.03 <sup>np</sup>     |
| Tip Branch Length                                                                            | tBL           | 3   | 148.93    | S3_27698909 | S3_26448604,<br>S3_29656367 | 8.45  | 4.82  | 0.08*                   |
| Minimum Primary Branch Length in the Upper Half of the Panicle                               | nPBLsu        | 3   | 158.02    | S3_29359583 | S3_28383390,<br>S3_29541959 | 11.29 | 7.49  | 0.08*                   |
| Heading Date                                                                                 | HD            | 3   | 178.72    | S3_32851774 | S3_30719621,<br>S3_33127721 | 3.95  | 3.92  | 3.52 days <sup>np</sup> |

| Trait Name                                                                | Trait Acronym | Chr | Peak (cM) | Peak Marker | Left Marker, Right Marker   | PVE   | LOD   | Add. Eff.              |
|---------------------------------------------------------------------------|---------------|-----|-----------|-------------|-----------------------------|-------|-------|------------------------|
| Exsertion Length                                                          | EL            | 4   | 2.14      | S4_405005   | S4_10622,<br>S4_19203350    | 6.11  | 4.07  | 0.81cm <sup>pp</sup>   |
| Maximum Primary Branch Length in the Upper Half of the Panicle            | xPBLsu        | 4   | 22.42     | S4_5672520  | S4_1814589,<br>S4_6948320   | 7.68  | 3.99  | 0.03*                  |
| Rachis Length                                                             | RL            | 4   | 98.04     | S4_25363835 | S4_24846658,<br>S4_26493364 | 5.47  | 4.49  | -0.93cm                |
| Primary Branch Number in the Lower Half of the Panicle                    | PBNin         | 4   | 98.04     | S4_25363835 | S4_24116694,<br>S4_28557463 | 7.84  | 4     | -0.43                  |
| Maximum Primary Branch Number                                             | xPBN          | 4   | 100.17    | S4_25983969 | S4_21310144,<br>S4_33337908 | 6.57  | 3.75  | -0.6                   |
| Maximum Exsertion Thickness                                               | xTE           | 4   | 108.52    | S4_27482637 | S4_25112152,<br>S4_31208138 | 8.74  | 4.78  | -0.01cm <sup>pp</sup>  |
| Number of Primary Branches per Internode                                  | BpN           | 4   | 122.47    | S4_29895055 | S4_28694937,<br>S4_31157231 | 10.4  | 4.75  | -0.02*                 |
| Number of Primary Branches per Internode in the Upper Half of the Panicle | BpNsu         | 4   | 127.4     | S4_30865838 | S4_30398628,<br>S4_32506016 | 9.06  | 4.6   | -0.03np                |
| Maximum Thickness of the Rachis                                           | xTR           | 4   | 128       | S4_30887947 | S4_27432714,<br>S4_31157231 | 15.05 | 5.95  | -0.01*                 |
| Number of Primary Branches per Internode Standard Deviation               | BpNsd         | 4   | 128       | S4_30889916 | S4_30398628,<br>S4_31157231 | 14.09 | 8.12  | -0.05                  |
| Maximum Number of Primary Branches per Internode                          | xBpN          | 4   | 128       | S4_30894887 | S4_30255555,<br>S4_31237412 | 10.94 | 7.44  | -0.13                  |
| Thickness of the Rachis                                                   | TR            | 4   | 128       | S4_30894887 | S4_30865838,<br>S4_31157231 | 18.25 | 8.4   | -0.003cm <sup>pp</sup> |
| Exsertion Thickness                                                       | TE            | 4   | 128       | S4_30894887 | S4_25050908,<br>S4_31157231 | 9.88  | 3.8   | -0.01cm <sup>pp</sup>  |
| Primary Branch Number in the Upper Half of the Panicle                    | PBNsu         | 4   | 128.9     | S4_31020320 | S4_30885454,<br>S4_31157231 | 21.36 | 12.11 | -0.07*                 |

| <b>Trait Name</b>                                                                            | <b>Trait Acronym</b> | <b>Chr</b> | <b>Peak (cM)</b> | <b>Peak Marker</b> | <b>Left Marker, Right Marker</b> | <b>PVE</b> | <b>LOD</b> | <b>Add. Eff.</b>        |
|----------------------------------------------------------------------------------------------|----------------------|------------|------------------|--------------------|----------------------------------|------------|------------|-------------------------|
| Primary Branch Number                                                                        | PBN                  | 4          | 128.9            | S4_31020320        | S4_30735893,<br>S4_31208138      | 11.26      | 7.65       | -0.82                   |
| Number of Primary Branches per Internode in the Upper Half of the Panicle Standard Deviation | BpNsusd              | 4          | 128.91           | S4_31157132        | S4_30735893,<br>S4_31237412      | 14.11      | 10.08      | -0.04*                  |
| Maximum Number of Primary Branches per Internode in the Upper Half of the Panicle            | xBpNsu               | 4          | 128.91           | S4_31157132        | S4_30428412,<br>S4_31157231      | 16.59      | 10.24      | -0.04*                  |
| Internode Number in the Upper Half of the Panicle                                            | NNsu                 | 4          | 128.91           | S4_31157132        | S4_30885454,<br>S4_31289624      | 4.61       | 4.61       | -0.29                   |
| Minimum Primary Branch Length in the Lower Half of the Panicle                               | nPBLin               | 5          | 8.94             | S5_1236478         | S5_32898,<br>S5_1507074          | 10.27      | 3.95       | -0.06*                  |
| Internode Length                                                                             | NL                   | 5          | 11.98            | S5_1442539         | S5_1247072,<br>S5_1507074        | 7.62       | 5.47       | -0.04*                  |
| Heading Date                                                                                 | HD                   | 5          | 13               | S5_1456951         | S5_1237260,<br>S5_2312488        | 5.4        | 5.25       | 2.52 days <sup>np</sup> |
| Number of Primary Branches per Internode in the Upper Half of the Panicle Standard Deviation | BpNsusd              | 5          | 52.52            | S5_7661534         | S5_6991580,<br>S5_16544219       | 6.29       | 4.85       | -0.03*                  |
| Maximum Number of Primary Branches per Internode in the Upper Half of the Panicle            | xBpNsu               | 5          | 52.52            | S5_7661534         | S5_6991580,<br>S5_16559773       | 5.52       | 3.74       | -0.02*                  |
| Maximum Total Primary Branch Length                                                          | xtotPBL              | 5          | 85.52            | S5_20687384        | S5_19798154,<br>S5_24906893      | 10.1       | 4.65       | 11.39cm                 |
| Primary Branch Number                                                                        | PBN                  | 5          | 87.03            | S5_20954473        | S5_18908122,<br>S5_22079772      | 5.99       | 4.26       | 0.83                    |
| Total Primary Branch Length                                                                  | totPBL               | 5          | 87.03            | S5_20986553        | S5_20464081,<br>S5_21080155      | 12.49      | 6.36       | 8.09cm                  |



| <b>Trait Name</b>                                                         | <b>Trait Acronym</b> | <b>Chr</b> | <b>Peak (cM)</b> | <b>Peak Marker</b> | <b>Left Marker, Right Marker</b> | <b>PVE</b> | <b>LOD</b> | <b>Add. Eff.</b>            |
|---------------------------------------------------------------------------|----------------------|------------|------------------|--------------------|----------------------------------|------------|------------|-----------------------------|
| Maximum Exsertion Thickness                                               | xTE                  | 5          | 87.03            | S5_20986553        | S5_20023184,<br>S5_21677168      | 7.7        | 4.24       | 0.01cm <sup>pp</sup>        |
| Maximum Primary Branch Number                                             | xPBN                 | 5          | 88.24            | S5_21080332        | S5_19798154,<br>S5_24906893      | 8.47       | 4.77       | 0.85                        |
| Primary Branch Number in the Lower Half of the Panicle                    | PBNin                | 5          | 94.26            | S5_21684588        | S5_19152649,<br>S5_23445666      | 9          | 4.55       | 0.64                        |
| Number of Primary Branches per Internode in the Lower Half of the Panicle | BpNin                | 5          | 96.09            | S5_22096397        | S5_20923388,<br>S5_24906893      | 8.59       | 3.92       | 0.08 <sup>np</sup>          |
| Thickness of the Rachis Standard Deviation                                | TRsd                 | 5          | 142.93           | S5_29271828        | S5_27985480,<br>S5_29744120      | 7.74       | 3.37       | -<br>0.0015cm <sup>pp</sup> |
| Minimum Primary Branch Length                                             | nPBL                 | 6          | 0.3              | S6_216858          | S6_107598,<br>S6_1501183         | 8.84       | 4.1        | -0.05*                      |
| Minimum Primary Branch Length in the Upper Half of the Panicle            | nPBLsu               | 6          | 0.6              | S6_285160          | S6_107598,<br>S6_2074873         | 7.59       | 5.2        | -0.05*                      |
| Internode Length                                                          | NL                   | 6          | 66.69            | S6_10107446        | S6_8821624,<br>S6_12033156       | 7.85       | 5.62       | -0.03*                      |
| Exsertion Length                                                          | EL                   | 6          | 121.49           | S6_22141171        | S6_21980490,<br>S6_22254152      | 6.23       | 4.15       | -0.28cm <sup>pp</sup>       |
| Exsertion Length                                                          | EL                   | 6          | 123.31           | S6_22260180        | S6_22200268,<br>S6_22410496      | 10.47      | 6.72       | -0.55cm <sup>pp</sup>       |
| Maximum Number of Primary Branches per Internode                          | xBpN                 | 6          | 145.99           | S6_26691211        | S6_26570815,<br>S6_26815270      | 6.35       | 4.5        | 0.01                        |
| Maximum Number of Primary Branches per Internode                          | xBpN                 | 6          | 150.57           | S6_27612798        | S6_27114480,<br>S6_27899598      | 8.9        | 6.17       | 0.09                        |
| Number of Primary Branches per Internode Standard Deviation               | BpNsd                | 7          | 21.2             | S7_2464872         | S7_286127,<br>S7_4138443         | 6.6        | 4.03       | 0.03                        |

| <b>Trait Name</b>                                                                            | <b>Trait Acronym</b> | <b>Chr</b> | <b>Peak (cM)</b> | <b>Peak Marker</b> | <b>Left Marker, Right Marker</b> | <b>PVE</b> | <b>LOD</b> | <b>Add. Eff.</b>       |
|----------------------------------------------------------------------------------------------|----------------------|------------|------------------|--------------------|----------------------------------|------------|------------|------------------------|
| Number of Primary Branches per Internode in the Upper Half of the Panicle                    | BpNsu                | 7          | 21.95            | S7_2502087         | S7_286127,<br>S7_3274717         | 7.07       | 3.63       | 0.03np                 |
| Maximum Exsertion Thickness                                                                  | xTE                  | 7          | 22.26            | S7_2614196         | S7_286127,<br>S7_3274717         | 8.46       | 4.64       | 0.01cm <sup>np</sup>   |
| Rachis Length                                                                                | RL                   | 7          | 22.56            | S7_2664270         | S7_286127,<br>S7_4683204         | 4.41       | 3.66       | 0.97cm                 |
| Primary Branch Number in the Upper Half of the Panicle                                       | PBNsu                | 7          | 23.77            | S7_2759545         | S7_2464872,<br>S7_3274717        | 6.19       | 3.94       | 0.03*                  |
| Number of Primary Branches per Internode in the Upper Half of the Panicle Standard Deviation | BpNsusd              | 7          | 23.77            | S7_2759545         | S7_286127,<br>S7_3274717         | 9.49       | 7.08       | 0.02*                  |
| Maximum Number of Primary Branches per Internode in the Upper Half of the Panicle            | xBpNsu               | 7          | 23.77            | S7_2759545         | S7_286127,<br>S7_3274717         | 8.18       | 5.41       | 0.02*                  |
| Panicle Length                                                                               | PL                   | 7          | 23.77            | S7_2759545         | S7_286127,<br>S7_4851150         | 7.6        | 3.6        | 1.14cm                 |
| Primary Branch Number                                                                        | PBN                  | 7          | 23.77            | S7_2759545         | S7_2464872,<br>S7_3396611        | 6.18       | 4.39       | 0.38                   |
| Total Primary Branch Length                                                                  | totPBL               | 7          | 23.77            | S7_2759545         | S7_286127,<br>S7_3396611         | 12.35      | 6.3        | 7.47cm                 |
| Thickness of the Rachis                                                                      | TR                   | 7          | 23.77            | S7_2759545         | S7_286127,<br>S7_3274717         | 7.12       | 3.51       | 0.0019cm <sup>np</sup> |
| Maximum Number of Primary Branches per Internode                                             | xBpN                 | 7          | 29.05            | S7_3274717         | S7_2601679,<br>S7_4348779        | 5.78       | 4.12       | 0.09                   |
| Primary Branch Length in the Upper Half of the Panicle                                       | PBLsu                | 8          | 34.81            | S8_4177366         | S8_3537285,<br>S8_5708455        | 11.15      | 4.88       | 0.04*                  |
| Minimum Primary Branch Length                                                                | nPBL                 | 8          | 39.68            | S8_5141914         | S8_3537285,<br>S8_5852658        | 8.91       | 4.13       | 0.05*                  |

| Trait Name                                                     | Trait Acronym | Chr | Peak (cM) | Peak Marker | Left Marker, Right Marker   | PVE   | LOD   | Add. Eff.              |
|----------------------------------------------------------------|---------------|-----|-----------|-------------|-----------------------------|-------|-------|------------------------|
| Maximum Primary Branch Length in the Upper Half of the Panicle | xPBLsu        | 8   | 56.07     | S8_9627773  | S8_8465714,<br>S8_19468327  | 8.31  | 4.3   | 0.04*                  |
| Minimum Primary Branch Length in the Upper Half of the Panicle | nPBLsu        | 8   | 69.57     | S8_19832020 | S8_3537285,<br>S8_21148406  | 7.1   | 4.88  | 0.03*                  |
| Exsertion Length                                               | EL            | 8   | 83.23     | S8_22603837 | S8_22484223,<br>S8_23270731 | 10.59 | 6.79  | -0.88cm <sup>pp</sup>  |
| Minimum Primary Branch Length in the Upper Half of the Panicle | nPBLsu        | 8   | 113.08    | S8_26929901 | S8_26844525,<br>S8_28389376 | 11.75 | 7.77  | 0.06*                  |
| Rachis Length                                                  | RL            | 8   | 115.82    | S8_27314672 | S8_27213374,<br>S8_28389376 | 11.05 | 8.57  | -1.68cm                |
| Internode Number in the Upper Half of the Panicle              | NNsu          | 8   | 115.82    | S8_27314672 | S8_27213374,<br>S8_27854290 | 8.07  | 8.07  | -0.36                  |
| Primary Branch Number in the Upper Half of the Panicle         | PBNsu         | 8   | 116.42    | S8_27330669 | S8_27213374,<br>S8_28134956 | 10.26 | 6.32  | -0.07*                 |
| Internode Number                                               | NN            | 8   | 116.73    | S8_27381639 | S8_26926770,<br>S8_28389376 | 8.71  | 4.49  | -0.58                  |
| Panicle Number                                                 | PN            | 8   | 117.33    | S8_27456412 | S8_26762931,<br>S8_28389376 | 16.08 | 6.59  | 1.63                   |
| Minimum Primary Branch Number                                  | nPBN          | 8   | 120.04    | S8_27893736 | S8_24768030,<br>S8_28389376 | 8.73  | 3.85  | -0.85 <sup>pp</sup>    |
| Tip Branch Length                                              | tBL           | 8   | 120.19    | S8_27910097 | S8_27301277,<br>S8_28134956 | 20.5  | 10.74 | 0.09*                  |
| Primary Branch Number                                          | PBN           | 8   | 120.95    | S8_28133070 | S8_27301277,<br>S8_28389376 | 6.51  | 4.61  | -0.89                  |
| Maximum Primary Branch Number                                  | xPBN          | 8   | 122.17    | S8_28134956 | S8_27626827,<br>S8_28389376 | 15.61 | 8.36  | -1.06                  |
| Thickness of the Rachis Standard Deviation                     | TRsd          | 8   | 122.34    | S8_28267215 | S8_27185076,<br>S8_28389376 | 11.77 | 5.01  | 0.0018cm <sup>pp</sup> |



| Trait Name                                                                                   | Trait Acronym | Chr | Peak (cM) | Peak Marker  | Left Marker, Right Marker     | PVE   | LOD   | Add. Eff.                |
|----------------------------------------------------------------------------------------------|---------------|-----|-----------|--------------|-------------------------------|-------|-------|--------------------------|
| Minimum Primary Branch Length in the Upper Half of the Panicle                               | nPBLsu        | 9   | 87.09     | S9_17134585  | S9_16971736,<br>S9_17348654   | 10.17 | 6.81  | 0.02*                    |
| Internode Length                                                                             | NL            | 9   | 106.66    | S9_18985817  | S9_16001454,<br>S9_21316402   | 5.13  | 3.77  | -0.03*                   |
| Heading Date                                                                                 | HD            | 9   | 119.72    | S9_21312838  | S9_18772960,<br>S9_21630557   | 4.6   | 4.52  | -3.43 days <sup>np</sup> |
| Minimum Primary Branch Length in the Upper Half of the Panicle                               | nPBLsu        | 9   | 120.02    | S9_21375539  | S9_20979971,<br>S9_21397964   | 19.34 | 12.03 | -0.06*                   |
| Minimum Internode Length                                                                     | nNL           | 9   | 120.84    | S9_21390653  | S9_20887955,<br>S9_21635970   | 12.08 | 6.8   | -0.04*                   |
| Primary Branch Length in the Upper Half of the Panicle                                       | PBLsu         | 9   | 124.88    | S9_21635970  | S9_21397964,<br>S9_22503375   | 13.56 | 5.85  | -0.05*                   |
| Maximum Primary Branch Length in the Upper Half of the Panicle                               | xPBLsu        | 9   | 124.88    | S9_21635970  | S9_21633972,<br>S9_22503375   | 14.87 | 7.37  | -0.04*                   |
| Tip Branch Length                                                                            | tBL           | 9   | 124.9     | S9_21841937  | S9_21093487,<br>S9_22903307   | 8.59  | 4.89  | -0.06*                   |
| Number of Primary Branches per Internode in the Upper Half of the Panicle Standard Deviation | BpNsusd       | 10  | 10.94     | S10_2733712  | S10_2410677,<br>S10_9903943   | 4.4   | 3.45  | -0.03*                   |
| Rachis Length                                                                                | RL            | 10  | 68.4      | S10_18811147 | S10_18223900,<br>S10_20363426 | 5.07  | 4.18  | 1.06cm                   |
| Internode Length                                                                             | NL            | 10  | 68.4      | S10_18813938 | S10_18448365,<br>S10_19468486 | 8.27  | 5.9   | 0.03*                    |
| Heading Date                                                                                 | HD            | 10  | 99.8      | S10_22841510 | S10_22017290,<br>S10_23124787 | 8.3   | 7.8   | -3.6 days <sup>np</sup>  |
| Heading Date                                                                                 | HD            | 11  | 15.44     | S11_2531514  | S11_2457120,<br>S11_2558011   | 6.98  | 6.67  | 2.43 days <sup>np</sup>  |

| Trait Name                                                                                   | Trait Acronym | Chr | Peak (cM) | Peak Marker  | Left Marker, Right Marker     | PVE   | LOD  | Add. Eff.               |
|----------------------------------------------------------------------------------------------|---------------|-----|-----------|--------------|-------------------------------|-------|------|-------------------------|
| Heading Date                                                                                 | HD            | 11  | 16.36     | S11_2561195  | S11_2557885,<br>S11_2597906   | 5.01  | 4.9  | 1.69 days <sup>sp</sup> |
| Minimum Internode Length                                                                     | nNL           | 11  | 35.27     | S11_4920784  | S11_4362683,<br>S11_5556815   | 14.16 | 7.85 | 0.04*                   |
| Internode Number                                                                             | NN            | 11  | 35.27     | S11_4920784  | S11_2378191,<br>S11_5859540   | 8.18  | 4.23 | -0.51                   |
| Total Primary Branch Length                                                                  | totPBL        | 11  | 36.49     | S11_5459296  | S11_2588493,<br>S11_6327532   | 10.52 | 5.43 | -7.93cm                 |
| Maximum Total Primary Branch Length                                                          | xtotPBL       | 11  | 36.49     | S11_5529639  | S11_2378191,<br>S11_7032038   | 7.64  | 3.57 | -9.68cm                 |
| Internode Number in the Lower Half of the Panicle                                            | NNin          | 11  | 38.29     | S11_5754289  | S11_4103134,<br>S11_5943371   | 13.19 | 5.8  | -0.37                   |
| Number of Primary Branches per Internode in the Upper Half of the Panicle Standard Deviation | BpNsusd       | 11  | 115.07    | S11_23262087 | S11_22736967,<br>S11_23509404 | 6.58  | 5.05 | -0.03*                  |
| Maximum Number of Primary Branches per Internode in the Upper Half of the Panicle            | xBpNsu        | 11  | 115.07    | S11_23262087 | S11_21270458,<br>S11_23829029 | 6.3   | 4.23 | -0.03*                  |

**Supplementary Table 6. A priori candidate gene list.**

| Gene name                                        | chr. | MSUv7_LocID    | MSUv7_coordL | MSUv7_coordR |
|--------------------------------------------------|------|----------------|--------------|--------------|
| OsYUC4                                           | 1    | LOC_Os01g12490 | 6857032      | 6860962      |
| OsYUC1; OsYUCCA1                                 | 1    | LOC_Os01g45760 | 25994669     | 25996948     |
| OsPIN1c                                          | 6    | LOC_Os06g12610 | 6866393      | 6869521      |
| OsGH3-2                                          | 7    | LOC_Os07g47490 | 28400307     | 28391698     |
| ASP1 (aberrant spikelet and panicle 1)           | 8    | LOC_Os08g06480 | 3667092      | 3675813      |
| OsJAG (OPB1; OPEN BEAK)                          | 1    | LOC_Os01g03840 | 1625159      | 1626771      |
| OsRA2                                            | 1    | LOC_Os01g07480 | 3552990      | 3551044      |
| OsPID-like                                       | 1    | LOC_Os01g07940 | 3838211      | 3835129      |
| OsGA3 oxidase-2 (D18)                            | 1    | LOC_Os01g08220 | 4004946      | 4003659      |
| SSG4                                             | 1    | LOC_Os01g08420 | 4133703      | 4140633      |
| OsGI1 (GIGANTEA)                                 | 1    | LOC_Os01g08700 | 4338485      | 4329152      |
| D2 (dwarf 2, ebisu dwarf)                        | 1    | LOC_Os01g10040 | 5236623      | 5244011      |
| GN1 (grain number 1; OsCKX2)                     | 1    | LOC_Os01g10110 | 5275678      | 5270103      |
| d-h gene (semidwarf)                             | 1    | LOC_Os01g10460 | 5530497      | 5533609      |
| OsYUC9                                           | 1    | LOC_Os01g16714 | 9488825      | 9493964      |
| OsYUC10                                          | 1    | LOC_Os01g16750 | 9512985      | 9515102      |
| OsGA2 oxidase-2                                  | 1    | LOC_Os01g22920 | 12885551     | 12884474     |
| OsCCD8a (d10-like)                               | 1    | LOC_Os01g38580 | 21669309     | 21665618     |
| LOG1 (lonely guy-1)                              | 1    | LOC_Os01g40630 | 22959225     | 22954908     |
| DWT1 (dwarf tiller 1)                            | 1    | LOC_Os01g47710 | 27292681     | 27288306     |
| OsMAX1 ortholog 1                                | 1    | LOC_Os01g50520 | 29020844     | 29021337     |
| OsMAX1 ortholog 2                                | 1    | LOC_Os01g50580 | 29039999     | 29041364     |
| OsBRI1 (O. sativa BRASSINOSTEROID INSENSITIVE 1) | 1    | LOC_Os01g52050 | 29931487     | 29927543     |
| OsYUC3                                           | 1    | LOC_Os01g53200 | 30561145     | 30564493     |
| OsCCD8b (d10)                                    | 1    | LOC_Os01g54270 | 31228566     | 31220321     |
| OsGA2 oxidase-3                                  | 1    | LOC_Os01g55240 | 31795105     | 31797643     |
| LAX1                                             | 1    | LOC_Os01g61480 | 35558148     | 35559225     |
| qSH1                                             | 1    | LOC_Os01g62920 | 36449951     | 36445019     |
| OsGA20 oxidase-2 (SD1)                           | 1    | LOC_Os01g66100 | 38382382     | 38385504     |
| PLA2 (plastochron2)                              | 1    | LOC_Os01g68000 | 39523638     | 39527227     |
| EP3 (erect panicle 3)                            | 2    | LOC_Os02g15950 | 9042076      | 9046141      |
| LARGER PANICLE 1 (LP1)                           | 2    | LOC_Os02g15950 | 9042076      | 9046141      |
| OsYUC12                                          | 2    | LOC_Os02g17230 | 9877605      | 9879276      |
| OsCPS1 (ent-copalyl diphosphate synthase 1)      | 2    | LOC_Os02g17780 | 10283727     | 10273718     |
| FOS1 (FON2 SPARE1)                               | 2    | LOC_Os02g21890 | 13014468     | 13015693     |
| RCN2 (rice TFL1/CENTRORADIALIS (CEN)-like-       | 2    | LOC_Os02g32950 | 19568968     | 19567632     |



| Gene name                                                              | chr. | MSUv7_LocID    | MSUv7_coordL | MSUv7_coordR |
|------------------------------------------------------------------------|------|----------------|--------------|--------------|
| 2) **not to be confused with<br>Reducedculmnumber                      |      |                |              |              |
| GID2                                                                   | 2    | LOC_Os02g36974 | 22333281     | 22337713     |
| OsMADS57                                                               | 2    | LOC_Os02g49840 | 30456666     | 30462759     |
| BRITTLE CULM3 (BC3)                                                    | 2    | LOC_Os02g50550 | 30871171     | 30861491     |
| OsPIN1; REH1                                                           | 2    | LOC_Os02g50960 | 31162062     | 31158903     |
| COP1                                                                   | 2    | LOC_Os02g53140 | 32533583     | 32528037     |
| SMG1 (small grain 1)                                                   | 2    | LOC_Os02g54600 | 33443948     | 33442069     |
| OsFD3                                                                  | 2    | LOC_Os02g58670 | 35854731     | 35853347     |
| EHD4 (early heading date 4)                                            | 3    | LOC_Os03g02160 | 717447       | 720837       |
| OsMADS50                                                               | 3    | LOC_Os03g03100 | 1300384      | 1298070      |
| TAD; TE                                                                | 3    | LOC_Os03g03150 | 1327397      | 1331210      |
| NAL7; OsYUC8                                                           | 3    | LOC_Os03g06654 | 3355041      | 3360485      |
| D14                                                                    | 3    | LOC_Os03g10620 | 5422148      | 5426577      |
| DL (drooping leaf)                                                     | 3    | LOC_Os03g11600 | 6041245      | 6048687      |
| LEAFY HULL STERILE 1 (LHS1)                                            | 3    | LOC_Os03g11614 | 6061369      | 6052750      |
| D4 (dwarf4)                                                            | 3    | LOC_Os03g12660 | 6737549      | 6744506      |
| SSD1 (sword shape dwarf1)                                              | 3    | LOC_Os03g19080 | 10684315     | 10688955     |
| BRITTLE CULM1 (BC1)                                                    | 3    | LOC_Os03g30250 | 17260196     | 17262960     |
| FC1 (FINE CULM1), also known as OsTB1 (O.<br>sativa TEOSINTEBRANCHED1) | 3    | LOC_Os03g49880 | 28428504     | 28430462     |
| SLR1 (SLENDER RICE 1)                                                  | 3    | LOC_Os03g49990 | 28512625     | 28515179     |
| OASB2                                                                  | 3    | LOC_Os03g50880 | 29071552     | 29067747     |
| OSH1 (~7 OSH genes with overlapping<br>functions)                      | 3    | LOC_Os03g51690 | 29606861     | 29596277     |
| OsMADS14                                                               | 3    | LOC_Os03g54160 | 31041569     | 31031146     |
| PAP2 (panicle phytomer-2) (OsMADS34)                                   | 3    | LOC_Os03g54170 | 31055019     | 31048351     |
| GASR1 (GA-stimulated transcript-related gene<br>1)                     | 3    | LOC_Os03g55290 | 31465625     | 31464840     |
| HD6                                                                    | 3    | LOC_Os03g55389 | 31514460     | 31508811     |
| DST (DROUGHT AND SALT TOLERANCE)                                       | 3    | LOC_Os03g57240 | 32647051     | 32645456     |
| HD16 (early flowering1, EF1)                                           | 3    | LOC_Os03g57940 | 32999502     | 33006898     |
| OsIDS1 (O. sativa INDETERMINATE SPIKELET 1)                            | 3    | LOC_Os03g60430 | 34358193     | 34362334     |
| OsGA20 oxidase-1                                                       | 3    | LOC_Os03g63970 | 36150664     | 36152517     |
| OsYUC7                                                                 | 4    | LOC_Os04g03980 | 1816073      | 1813950      |
| OsRA1                                                                  | 4    | LOC_Os04g08600 | 4678833      | 4674744      |
| OsTS2 (rice ortholog tasselseed-2)                                     | 4    | LOC_Os04g10000 | 5381565      | 5380095      |
| An-1 (awn-1)                                                           | 4    | LOC_Os04g28280 | 16734806     | 16732393     |
| LAX PANICLE2 (LAX2)                                                    | 4    | LOC_Os04g32510 | 19564239     | 19566320     |
| TDD1 (tryptophan deficient dwarf); OASB1                               | 4    | LOC_Os04g38950 | 23142821     | 23139158     |
| GASR2 (GA-stimulated transcript-related gene<br>2)                     | 4    | LOC_Os04g39110 | 23243202     | 23242283     |
| DWARF11 (D11, shinkane-aikoku)                                         | 4    | LOC_Os04g39430 | 23471594     | 23467128     |
| OsGA2 oxidase-6                                                        | 4    | LOC_Os04g44150 | 26134356     | 26130707     |

| Gene name                                                  | chr. | MSUv7_LocID    | MSUv7_coordL | MSUv7_coordR |
|------------------------------------------------------------|------|----------------|--------------|--------------|
| TOB1 (Tongari-Boushi 1)                                    | 4    | LOC_Os04g45330 | 26800253     | 26797650     |
| HTD1 (high-tillering dwarf 1); (also known as OsCCD7, D17) | 4    | LOC_Os04g46470 | 27567824     | 27570926     |
| OsFD4                                                      | 4    | LOC_Os04g47270 | 28070371     | 28067096     |
| APO2 (aberrant panicle organization-2; also known as RFL)  | 4    | LOC_Os04g51000 | 30185852     | 30182589     |
| AP2-domain containing protein                              | 4    | LOC_Os04g52090 | 30939177     | 30940275     |
| OsKS1                                                      | 4    | LOC_Os04g52230 | 31026617     | 31031248     |
| OsMADS31                                                   | 4    | LOC_Os04g52410 | 31143083     | 31144886     |
| SPIKE (NAL1)                                               | 4    | LOC_Os04g52479 | 31203525     | 31214741     |
| OsLG1 (SPR3 locus)                                         | 4    | LOC_Os04g56170 | 33488512     | 33492876     |
| SHA1 (shattering 1)                                        | 4    | LOC_Os04g57530 | 34233373     | 34231186     |
| OsRR6                                                      | 4    | LOC_Os04g57720 | 34375978     | 34377357     |
| OsGA2 oxidase-1                                            | 5    | LOC_Os05g06670 | 3459616      | 3465991      |
| OsGA3 oxidase-1                                            | 5    | LOC_Os05g08540 | 4662589      | 4660662      |
| D2 homolog (dwarf 2, ebisu dwarf)                          | 5    | LOC_Os05g11130 | 6267906      | 6273074      |
| DWARF1 (dwarf 1, RGA)                                      | 5    | LOC_Os05g26890 | 15613483     | 15609844     |
| GID1L2 (gibberellin insensitive dwarf 1; GID1)             | 5    | LOC_Os05g33730 | 19868419     | 19871283     |
| OsGA20 oxidase-4                                           | 5    | LOC_Os05g34854 | 20692274     | 20685346     |
| OsLAC                                                      | 5    | LOC_Os05g38420 | 22533536     | 22536101     |
| ELONGATED UPPERMOST INTERNODE 1 (EU11)                     | 5    | LOC_Os05g40384 | 23728502     | 23738405     |
| OsGA2 oxidase-4                                            | 5    | LOC_Os05g43880 | 25516204     | 25515053     |
| OsYUC2                                                     | 5    | LOC_Os05g45240 | 26263760     | 26261275     |
| OsKAO1 (dwarf 3)                                           | 6    | LOC_Os06g02019 | 580665       | 586450       |
| DLT (D62, OsGRAS62)                                        | 6    | LOC_Os06g03710 | 1468600      | 1465499      |
| StarchSynthase                                             |      | LOC_Os06g04200 | 1766194      | 1770656      |
| D3 (dwarf 3, dwarf bunketsuwaito tillering)                | 6    | LOC_Os06g06050 | 2780715      | 2785271      |
| RFT1 (RICE FLOWERING LOCUS T 1, RFT1/FT-L3)                | 6    | LOC_Os06g06300 | 2926823      | 2928474      |
| HD3a (Heading date 3a)                                     | 6    | LOC_Os06g06320 | 2940004      | 2942452      |
| Hd1 (heading date 1)                                       | 6    | LOC_Os06g16370 | 9336359      | 9338643      |
| OsKO2 (D35)                                                | 6    | LOC_Os06g37300 | 22028146     | 22020840     |
| MOC1 (SPA1=allele)                                         | 6    | LOC_Os06g40780 | 24311420     | 24316382     |
| APO1 (aberrant panicle organization-1) (also known as UFO) | 6    | LOC_Os06g45460 | 27481387     | 27480082     |
| DENSE AND ERECT PANICLE 3 (DEP3)                           | 6    | LOC_Os06g46350 | 28110979     | 28109236     |
| OsLIC1                                                     | 6    | LOC_Os06g49080 | 29738880     | 29742503     |
| SPW1 (SUPERWOMAN1); also known as OsMADS16                 | 6    | LOC_Os06g49840 | 30177996     | 30173485     |
| FON1 (floral organ number 1)                               | 6    | LOC_Os06g50340 | 30474473     | 30470045     |
| OsFD6                                                      | 6    | LOC_Os06g50480 | 30564131     | 30567036     |
| OsFD2                                                      | 6    | LOC_Os06g50600 | 30624219     | 30620816     |
| OsFD5                                                      | 6    | LOC_Os06g50830 | 30758412     | 30754644     |
| OsGA2 oxidase-5                                            | 7    | LOC_Os07g01340 | 213778       | 219544       |

| Gene name                                                                                                                          | chr. | MSUv7_LocID    | MSUv7_coordL | MSUv7_coordR |
|------------------------------------------------------------------------------------------------------------------------------------|------|----------------|--------------|--------------|
| OsMADS15                                                                                                                           | 7    | LOC_Os07g01820 | 477655       | 471174       |
| G1 (long sterile lemma)                                                                                                            | 7    | LOC_Os07g04670 | 2068174      | 2067344      |
| PROG1 (prostrate growth 1)                                                                                                         | 7    | LOC_Os07g05900 | 2839979      | 2839476      |
| OsGA20 oxidase-3                                                                                                                   | 7    | LOC_Os07g07420 | 3702287      | 3705030      |
| SNB (SUPERNUMERARY BRACT)                                                                                                          | 7    | LOC_Os07g13170 | 7545486      | 7550141      |
| GHD7 (grain number, plant height, and heading date 7)                                                                              | 7    | LOC_Os07g15770 | 9155185      | 9152402      |
| OsYUC6                                                                                                                             | 7    | LOC_Os07g25540 | 14620501     | 14618203     |
| Oshox1 (rice vrs1)                                                                                                                 | 7    | LOC_Os07g39280 | 23515632     | 23511899     |
| OsMADS18                                                                                                                           | 7    | LOC_Os07g41370 | 24788476     | 24793884     |
| DENSE AND ERECT PANICLE 2 (DEP2)                                                                                                   | 7    | LOC_Os07g42410 | 25381698     | 25389547     |
| SRA (sister of RA3)                                                                                                                | 7    | LOC_Os07g43160 | 25867212     | 25871233     |
| FZP (frizzy panicle)                                                                                                               | 7    | LOC_Os07g47330 | 28301089     | 28299591     |
| Ehd3                                                                                                                               | 8    | LOC_Os08g01420 | 276978       | 272854       |
| GHD8                                                                                                                               | 8    | LOC_Os08g07740 | 4335434      | 4333717      |
| OsBAK1                                                                                                                             | 8    | LOC_Os08g07760 | 4344171      | 4350502      |
| SPL14 (SQUAMOSA PROMOTER BINDING PROTEIN-LIKE1, also known as WFP (wealthy farmer's panicle) and IPA1 (ideal plant architecture 1) | 8    | LOC_Os08g39890 | 25278696     | 25274449     |
| SPL16 (QTL GW8)                                                                                                                    | 8    | LOC_Os08g41940 | 26501167     | 26506218     |
| OsTRX1                                                                                                                             | 9    | LOC_Os09g04890 | 2615934      | 2601650      |
| EMF2b (embryonic flower 2b)                                                                                                        | 9    | LOC_Os09g13630 | 7938161      | 7925560      |
| OsCPS3 ((ent-copalyl diphosphate synthase 3)                                                                                       | 9    | LOC_Os09g15050 | 9096555      | 9101314      |
| DEP1 (DENSE AND ERECT PANICLE 1); also identified as EP                                                                            | 9    | LOC_Os09g26999 | 16411151     | 16415862     |
| OsFD1                                                                                                                              | 9    | LOC_Os09g36910 | 21291988     | 21293452     |
| PLA1 (plastochron1)                                                                                                                | 10   | LOC_Os10g26340 | 13660543     | 13658790     |
| Ehd2; OsID1; RID1; Ghd10                                                                                                           | 10   | LOC_Os10g28330 | 14742745     | 14739569     |
| Ehd1                                                                                                                               | 10   | LOC_Os10g32600 | 17077979     | 17076098     |
| TAW1 (TAWAWA 1)                                                                                                                    | 10   | LOC_Os10g33780 | 17889724     | 17888297     |
| D53                                                                                                                                | 11   | LOC_Os11g01330 | 194176       | 199479       |
| OsPIN1b                                                                                                                            | 11   | LOC_Os11g04190 | 1705477      | 1702178      |
| RCN1 (rice TFL1/CENTRORADIALIS (CEN)-like-1) **not to be confused with Reducedculmnumber                                           | 11   | LOC_Os11g05470 | 2454103      | 2452525      |
| OsYUC14                                                                                                                            | 11   | LOC_Os11g10170 | 5514584      | 5516300      |
| SP1 (short panicle-1)                                                                                                              | 11   | LOC_Os11g12740 | 7198552      | 7193230      |
| FON2 (floral organ number 2) (FON4 = allele)                                                                                       | 11   | LOC_Os11g38270 | 22664995     | 22663457     |
| OsYUC11                                                                                                                            | 12   | LOC_Os12g08780 | 4517346      | 4515673      |
| OsDEC1                                                                                                                             | 12   | LOC_Os12g27994 | 16504887     | 16500199     |
| OsYUC5                                                                                                                             | 12   | LOC_Os12g32750 | 19779505     | 19786587     |
| OsPID (BIF2)                                                                                                                       | 12   | LOC_Os12g42020 | 26055221     | 26057002     |
| OsMADS3 - MADS-box family gene with MIKCC                                                                                          | 1    | LOC_Os01g10504 | 5559548      | 5568844      |



| Gene name                                                        | chr. | MSUv7_LocID    | MSUv7_coordL | MSUv7_coordR |
|------------------------------------------------------------------|------|----------------|--------------|--------------|
| type-box, expressed                                              |      |                |              |              |
| OsMADS91 - MADS-box family gene with M-beta type-box, expressed  | 1    | LOC_Os01g11510 | 6191931      | 6193745      |
| OsMADS88 - MADS-box family gene with M-gamma type-box, expressed | 1    | LOC_Os01g18420 | 10352429     | 10353151     |
| OsMADS89 - MADS-box family gene with M-gamma type-box, expressed | 1    | LOC_Os01g18440 | 10366411     | 10367331     |
| OsMADS92 - MADS-box family gene with M-beta type-box, expressed  | 1    | LOC_Os01g23750 | 13360117     | 13361337     |
| OsMADS93 - MADS-box family gene with M-beta type-box, expressed  | 1    | LOC_Os01g23760 | 13363707     | 13364930     |
| OsMADS94 - MADS-box family gene with M-beta type-box, expressed  | 1    | LOC_Os01g23770 | 13366416     | 13367710     |
| OsMADS95 - MADS-box family gene with M-beta type-box, expressed  | 1    | LOC_Os01g23780 | 13373620     | 13374665     |
| OsMADS32 - MADS-box family gene with MIKCc type-box, expressed   | 1    | LOC_Os01g52680 | 30278492     | 30280577     |
| OsMADS2 - MADS-box family gene with MIKCc type-box, expressed    | 1    | LOC_Os01g66030 | 38320785     | 38324074     |
| OsMADS21 - MADS-box family gene with MIKCc type-box, expressed   | 1    | LOC_Os01g66290 | 38500880     | 38505127     |
| OsMADS96 - MADS-box family gene with M-beta type-box, expressed  | 1    | LOC_Os01g67890 | 39459599     | 39461050     |
| OsMADS97 - MADS-box family gene with M-beta type-box, expressed  | 1    | LOC_Os01g68420 | 39762896     | 39763714     |
| OsMADS98 - MADS-box family gene with M-beta type-box, expressed  | 1    | LOC_Os01g68560 | 39826794     | 39828732     |
| OsMADS65 - MADS-box family gene with MIKC* type-box, expressed   | 1    | LOC_Os01g69850 | 40344329     | 40364584     |
| OsMADS79 - MADS-box family gene with M-alpha type-box, expressed | 1    | LOC_Os01g74440 | 43112781     | 43113407     |
| OsMADS60 - MADS-box family gene with MIKCc type-box, expressed   | 2    | LOC_Os02g01360 | 205424       | 207508       |
| OsMADS80 - MADS-box family gene with M-alpha type-box, expressed | 2    | LOC_Os02g06860 | 3459445      | 3460305      |
| OsMADS29 - MADS-box family gene with MIKCc type-box, expressed   | 2    | LOC_Os02g07430 | 3833129      | 3837135      |
| OsMADS27 - MADS-box family gene with MIKCc type-box, expressed   | 2    | LOC_Os02g36924 | 22294657     | 22301808     |
| OsMADS6 - MADS-box family gene with MIKCc type-box, expressed    | 2    | LOC_Os02g45770 | 27875979     | 27884079     |
| OsMADS57 - MADS-box family gene with MIKCc type-box, expressed   | 2    | LOC_Os02g49840 | 30456666     | 30462759     |
| OsMADS22 - MADS-box family gene with MIKCc type-box, expressed   | 2    | LOC_Os02g52340 | 32038902     | 32045130     |
| OsMADS50 - MADS-box family gene with MIKCc type-box, expressed   | 3    | LOC_Os03g03100 | 1298070      | 1300384      |

| Gene name                                                        | chr. | MSUv7_LocID    | MSUv7_coordL | MSUv7_coordR |
|------------------------------------------------------------------|------|----------------|--------------|--------------|
| OsMADS47 - MADS-box family gene with MIKCC type-box, expressed   | 3    | LOC_Os03g08754 | 4519405      | 4525778      |
| OsMADS72 - MADS-box family gene with M-alpha type-box, expressed | 3    | LOC_Os03g14850 | 8096539      | 8098764      |
| OsMADS86 - MADS-box family gene with M-gamma type-box, expressed | 3    | LOC_Os03g37670 | 20891504     | 20895054     |
| OsMADS87 - MADS-box family gene with M-gamma type-box, expressed | 3    | LOC_Os03g38610 | 21428521     | 21429270     |
| OsMADS14 - MADS-box family gene with MIKCC type-box, expressed   | 3    | LOC_Os03g54160 | 31031146     | 31041569     |
| OsMADS34 - MADS-box family gene with MIKCC type-box, expressed   | 3    | LOC_Os03g54170 | 31048351     | 31055019     |
| OsMADS25 - MADS-box family gene with MIKCC type-box, expressed   | 4    | LOC_Os04g23910 | 13672710     | 13675884     |
| OsMADS81 - MADS-box family gene with M-gamma type-box, expressed | 4    | LOC_Os04g24790 | 14239637     | 14240295     |
| OsMADS82 - MADS-box family gene with M-gamma type-box, expressed | 4    | LOC_Os04g24800 | 14243635     | 14244264     |
| OsMADS83 - MADS-box family gene with M-gamma type-box            | 4    | LOC_Os04g24810 | 14259164     | 14259793     |
| OsMADS84 - MADS-box family gene with M-gamma type-box, expressed | 4    | LOC_Os04g25870 | 15035746     | 15036375     |
| OsMADS85 - MADS-box family gene with M-gamma type-box, expressed | 4    | LOC_Os04g25920 | 15078802     | 15079431     |
| OsMADS99 - MADS-box family gene with M-gamma type-box            | 4    | LOC_Os04g25930 | 15082804     | 15083433     |
| OsMADS64 - MADS-box family gene with M-alpha type-box, expressed | 4    | LOC_Os04g31804 | 19042703     | 19058654     |
| OsMADS61 - MADS-box family gene with MIKCC type-box, expressed   | 4    | LOC_Os04g38770 | 23040160     | 23041485     |
| OsMADS17 - MADS-box family gene with MIKCC type-box, expressed   | 4    | LOC_Os04g49150 | 29308245     | 29314112     |
| OsMADS31 - MADS-box family gene with MIKCC type-box, expressed   | 4    | LOC_Os04g52410 | 31143083     | 31144886     |
| OsMADS66 - MADS-box family gene with MIKCC type-box, expressed   | 5    | LOC_Os05g11380 | 6426374      | 6434650      |
| OsMADS58 - MADS-box family gene with MIKCC type-box, expressed   | 5    | LOC_Os05g11414 | 6447183      | 6458100      |
| OsMADS70 - MADS-box family gene with M-alpha type-box, expressed | 5    | LOC_Os05g23780 | 13656346     | 13657002     |
| OsMADS4 - MADS-box family gene with MIKCC type-box, expressed    | 5    | LOC_Os05g34940 | 20759446     | 20762662     |
| OsMADS5 - MADS-box family gene with MIKCC type-box, expressed    | 6    | LOC_Os06g06750 | 3162801      | 3169415      |
| OsMADS55 - MADS-box family gene with MIKCC type-box, expressed   | 6    | LOC_Os06g11330 | 5953593      | 5963184      |
| OsMADS63 - MADS-box family gene with                             | 6    | LOC_Os06g11970 | 6372353      | 6376374      |

| Gene name                                                        | chr. | MSUv7_LocID    | MSUv7_coordL | MSUv7_coordR |
|------------------------------------------------------------------|------|----------------|--------------|--------------|
| MIKC* type-box, expressed                                        |      |                |              |              |
| OsMADS71 - MADS-box family gene with M-alpha type-box, expressed | 6    | LOC_Os06g22760 | 13244910     | 13245626     |
| OsMADS59 - MADS-box family gene with MIKCc type-box              | 6    | LOC_Os06g23950 | 13996414     | 13997319     |
| OsMADS75 - MADS-box family gene with M-alpha type-box, expressed | 6    | LOC_Os06g30810 | 17869243     | 17869875     |
| OsMADS76 - MADS-box family gene with M-alpha type-box, expressed | 6    | LOC_Os06g30830 | 17887762     | 17891217     |
| OsMADS30 - MADS-box family gene with MIKCc type-box, expressed   | 6    | LOC_Os06g45650 | 27637555     | 27641578     |
| OsMADS16 - MADS-box family gene with MIKCc type-box, expressed   | 6    | LOC_Os06g49840 | 30173485     | 30178066     |
| OsMADS15 - MADS-box family gene with MIKCc type-box, expressed   | 7    | LOC_Os07g01820 | 471174       | 477655       |
| OsMADS90 - MADS-box family gene with M-beta type-box, expressed  | 7    | LOC_Os07g04170 | 1781625      | 1785426      |
| OsMADS18 - MADS-box family gene with MIKCc type-box, expressed   | 7    | LOC_Os07g41370 | 24788476     | 24793884     |
| OsMADS26 - MADS-box family gene with MIKCc type-box, expressed   | 8    | LOC_Os08g02070 | 679358       | 681739       |
| OsMADS23 - MADS-box family gene with MIKCc type-box, expressed   | 8    | LOC_Os08g33488 | 20897215     | 20906881     |
| OsMADS62 - MADS-box family gene with MIKC* type-box, expressed   | 8    | LOC_Os08g38590 | 24391630     | 24393867     |
| OsMADS7 - MADS-box family gene with MIKCc type-box, expressed    | 8    | LOC_Os08g41950 | 26507180     | 26512261     |
| OsMADS37 - MADS-box family gene with MIKC* type-box, expressed   | 8    | LOC_Os08g41960 | 26518976     | 26529016     |
| OsMADS77 - MADS-box family gene with M-alpha type-box, expressed | 9    | LOC_Os09g02780 | 1272405      | 1272941      |
| OsMADS78 - MADS-box family gene with M-alpha type-box, expressed | 9    | LOC_Os09g02830 | 1325181      | 1325807      |
| OsMADS8 - MADS-box family gene with MIKCc type-box, expressed    | 9    | LOC_Os09g32948 | 19653389     | 19659766     |
| OsMADS56 - MADS-box family gene with MIKCc type-box, expressed   | 10   | LOC_Os10g39130 | 20862952     | 20873797     |
| OsMADS68 - MADS-box family gene with MIKC* type-box, expressed   | 11   | LOC_Os11g43740 | 26414394     | 26418442     |
| OsMADS33 - MADS-box family gene with MIKCc type-box, expressed   | 12   | LOC_Os12g10520 | 5569433      | 5573026      |
| OsMADS13 - MADS-box family gene with MIKCc type-box, expressed   | 12   | LOC_Os12g10540 | 5584593      | 5590285      |
| OsMADS73 - MADS-box family gene with M-alpha type-box, expressed | 12   | LOC_Os12g21850 | 12303478     | 12304062     |
| OsMADS74 - MADS-box family gene with M-alpha type-box, expressed | 12   | LOC_Os12g21880 | 12319519     | 12320281     |



| Gene name                                                      | chr. | MSUv7_LocID    | MSUv7_coordL | MSUv7_coordR |
|----------------------------------------------------------------|------|----------------|--------------|--------------|
| OsMADS20 - MADS-box family gene with MIKCC type-box, expressed | 12   | LOC_Os12g31748 | 19106070     | 19115282     |
| WRKY1                                                          | 1    | LOC_Os01g14440 | 8084372      | 8087044      |
| WRKY9                                                          | 1    | LOC_Os01g18584 | 10470540     | 10478800     |
| WRKY10                                                         | 1    | LOC_Os01g09100 | 4572448      | 4573409      |
| WRKY11                                                         | 1    | LOC_Os01g43650 | 25009453     | 25012236     |
| WRKY12                                                         | 1    | LOC_Os01g43550 | 24945282     | 24947296     |
| WRKY13                                                         | 1    | LOC_Os01g54600 | 31409004     | 31410978     |
| WRKY14                                                         | 1    | LOC_Os01g53040 | 30480134     | 30482161     |
| WRKY15                                                         | 1    | LOC_Os01g46800 | 26687377     | 26688416     |
| WRKY16                                                         | 1    | LOC_Os01g47560 | 27196417     | 27200990     |
| WRKY17                                                         | 1    | LOC_Os01g74140 | 42946753     | 42948750     |
| WRKY18                                                         | 1    | LOC_Os01g60520 | 34996792     | 35003226     |
| WRKY20                                                         | 1    | LOC_Os01g60540 | 35008866     | 35011098     |
| WRKY21                                                         | 1    | LOC_Os01g60640 | 35062734     | 35064940     |
| WRKY22                                                         | 1    | LOC_Os01g60490 | 34981468     | 34985447     |
| WRKY23                                                         | 1    | LOC_Os01g53260 | 30604295     | 30608077     |
| WRKY24                                                         | 1    | LOC_Os01g61080 | 35347978     | 35350645     |
| WRKY26                                                         | 1    | LOC_Os01g51690 | 29720923     | 29723065     |
| WRKY27                                                         | 1    | LOC_Os01g40430 | 22824809     | 22827116     |
| WRKY77                                                         | 1    | LOC_Os01g40260 | 22731943     | 22733240     |
| WRKY79                                                         | 1    | LOC_Os01g08710 | 4340849      | 4356468      |
| WRKY86                                                         | 1    | LOC_Os01g60600 | 35032511     | 35035321     |
| WRKY97                                                         | 1    | LOC_Os01g09080 | 4566304      | 4568617      |
| WRKY32                                                         | 2    | LOC_Os02g53100 | 32489017     | 32495070     |
| WRKY34                                                         | 2    | LOC_Os02g43560 | 26280253     | 26283914     |
| WRKY39                                                         | 2    | LOC_Os02g16540 | 9446492      | 9448847      |
| WRKY42                                                         | 2    | LOC_Os02g26430 | 15521497     | 15522724     |
| WRKY66                                                         | 2    | LOC_Os02g47060 | 28726783     | 28730933     |
| WRKY71                                                         | 2    | LOC_Os02g08440 | 4542762      | 4544983      |
| WRKY3                                                          | 3    | LOC_Os03g55080 | 31323190     | 31326926     |
| WRKY4                                                          | 3    | LOC_Os03g55164 | 31391390     | 31399050     |
| WRKY6                                                          | 3    | LOC_Os03g58420 | 33286651     | 33288563     |
| WRKY44                                                         | 3    | LOC_Os03g21710 | 12394669     | 12396898     |
| WRKY55a                                                        | 3    | LOC_Os03g20550 | 11650824     | 11652144     |
| WRKY55b                                                        | 3    | LOC_Os03g20550 | 11650824     | 11652144     |
| WRKY60                                                         | 3    | LOC_Os03g45450 | 25651039     | 25652125     |
| WRKY87                                                         | 3    | LOC_Os03g53050 | 30422191     | 30425543     |
| WRKY88                                                         | 3    | LOC_Os03g63810 | 36039164     | 36043822     |
| WRKY35                                                         | 4    | LOC_Os04g39570 | 23579837     | 23587188     |
| WRKY36                                                         | 4    | LOC_Os04g46060 | 27284275     | 27290983     |
| WRKY37                                                         | 4    | LOC_Os04g50920 | 30132491     | 30136547     |
| WRKY68                                                         | 4    | LOC_Os04g51560 | 30545175     | 30546577     |

| Gene name | chr. | MSUv7_LocID    | MSUv7_coordL | MSUv7_coordR |
|-----------|------|----------------|--------------|--------------|
| WRKY5     | 5    | LOC_Os05g04640 | 2179520      | 2184940      |
| WRKY7     | 5    | LOC_Os05g46020 | 26682472     | 26684208     |
| WRKY8     | 5    | LOC_Os05g50610 | 29009136     | 29013172     |
| WRKY19    | 5    | LOC_Os05g49620 | 28471802     | 28473061     |
| WRKY43    | 5    | LOC_Os05g49210 | 28238562     | 28241041     |
| WRKY45    | 5    | LOC_Os05g25770 | 14991579     | 14993800     |
| WRKY48    | 5    | LOC_Os05g40060 | 23529423     | 23530499     |
| WRKY49    | 5    | LOC_Os05g49100 | 28154693     | 28157989     |
| WRKY53    | 5    | LOC_Os05g27730 | 16150266     | 16152747     |
| WRKY54    | 5    | LOC_Os05g40080 | 23550611     | 23551716     |
| WRKY58    | 5    | LOC_Os05g45230 | 26256951     | 26257809     |
| WRKY67    | 5    | LOC_Os05g09020 | 4998210      | 4999629      |
| WRKY70    | 5    | LOC_Os05g39720 | 23310474     | 23313449     |
| WRKY89a   | 5    | LOC_Os05g03900 | 1743366      | 1745281      |
| WRKY89b   | 5    | LOC_Os05g03900 | 1743366      | 1745281      |
| WRKY90    | 5    | LOC_Os05g14370 | 8086892      | 8088575      |
| WRKY91    | 5    | LOC_Os05g40070 | 23536113     | 23539013     |
| WRKY92    | 5    | LOC_Os05g50700 | 29064582     | 29065815     |
| WRKY28    | 6    | LOC_Os06g44010 | 26509919     | 26511699     |
| WRKY31    | 6    | LOC_Os06g30860 | 17915923     | 17917083     |
| WRKY73    | 6    | LOC_Os06g05380 | 2429149      | 2433254      |
| WRKY93    | 6    | LOC_Os06g06360 | 2958991      | 2963006      |
| WRKY29    | 7    | LOC_Os07g02060 | 630562       | 634316       |
| WRKY47    | 7    | LOC_Os07g48260 | 28828793     | 28832398     |
| WRKY78    | 7    | LOC_Os07g39480 | 23654076     | 23659625     |
| WRKY94    | 7    | LOC_Os07g17230 | 10155452     | 10159775     |
| WRKY95    | 7    | LOC_Os07g27670 | 16147913     | 16149483     |
| WRKY96    | 7    | LOC_Os07g40570 | 24311898     | 24315383     |
| WRKY25    | 8    | LOC_Os08g13840 | 8258454      | 8259597      |
| WRKY30    | 8    | LOC_Os08g38990 | 24645860     | 24649860     |
| WRKY69    | 8    | LOC_Os08g29660 | 18220041     | 18222408     |
| WRKY82    | 8    | LOC_Os08g17400 | 10633195     | 10639603     |
| WRKY62    | 9    | LOC_Os09g25070 | 14992803     | 14994888     |
| WRKY74    | 9    | LOC_Os09g16510 | 10128825     | 10131136     |
| WRKY76    | 9    | LOC_Os09g25060 | 14975932     | 14977713     |
| WRKY80    | 9    | LOC_Os09g30400 | 18496949     | 18501264     |
| WRKY98    | 9    | LOC_Os09g09630 | 5187963      | 5190200      |
| WRKY2     | 10   | LOC_Os10g42850 | 23107503     | 23108646     |
| WRKY40    | 11   | LOC_Os11g02530 | 787542       | 789030       |
| WRKY41    | 11   | LOC_Os11g45920 | 27779324     | 27785982     |
| WRKY46a   | 11   | LOC_Os11g02480 | 759587       | 763334       |
| WRKY50    | 11   | LOC_Os11g02540 | 793116       | 795608       |
| WRKY52    | 11   | LOC_Os11g02470 | 749998       | 751210       |

| Gene name | chr. | MSUv7_LocID    | MSUv7_coordL | MSUv7_coordR |
|-----------|------|----------------|--------------|--------------|
| WRKY59    | 11   | LOC_Os11g45750 | 27683640     | 27695070     |
| WRKY61    | 11   | LOC_Os11g45850 | 27740142     | 27741375     |
| WRKY72    | 11   | LOC_Os11g29870 | 17352085     | 17355820     |
| WRKY100   | 11   | LOC_Os11g02520 | 782358       | 783511       |
| WRKY46b   | 12   | LOC_Os12g02420 | 802489       | 806097       |
| WRKY56    | 12   | LOC_Os12g02440 | 817003       | 823003       |
| WRKY57    | 12   | LOC_Os12g01180 | 100799       | 104008       |
| WRKY64    | 12   | LOC_Os12g02450 | 824302       | 825793       |
| WRKY65    | 12   | LOC_Os12g02470 | 836516       | 838755       |
| WRKY81    | 12   | LOC_Os12g02400 | 789403       | 790687       |
| WRKY83    | 12   | LOC_Os12g40570 | 25100479     | 25104175     |
| WRKY85    | 12   | LOC_Os12g32250 | 19473728     | 19478606     |



## Supplementary Note

The three most significant peaks in the study co-localized with candidate genes within the gibberellin signaling cascade and were identified when mapping for agronomic traits: *GIDI* (*GIBBERELLIN INSENSITIVE DWARF1*), a soluble gibberellin receptor<sup>1</sup> associated with booting; *SDI* (*SEMIDWARF 1*), a OsGA20-oxidase gibberellin biosynthesis enzyme associated with plant height<sup>2</sup>; and *OsGA2ox-5*, a gibberellin degradation enzyme<sup>3</sup> associated with total shoot biomass (Supplementary Figs. 62-64).

We detected five transcription factors associated with panicle phenotypes. Two of these genes, *ERECT PANICLE 3* (*EP3*, also known as *LARGER PANICLE*) and *BRASSINAZOLE RESISTANT 1* (*BZRI*), were detected when mapping for panicle traits across all varieties in the panel and are transcriptional regulators of the cytokinin and brassinosteroid signaling pathways, respectively<sup>4-6</sup>. *EP3* shared a coexpression network with *DENSE AND ERECT PANICLE 1* (Supplementary Fig. 74), a G-protein with alleles that have been linked to internode length phenotypes<sup>7</sup>. *BZRI* shared a coexpression network with *FLORAL ORGAN NUMBER 1*<sup>8</sup>, a member of the *CLAVATA* signaling cascade known to be involved in floral meristem differentiation, and *SHORT PANICLE 1*, a putative nitrogen transporter of unknown function that ubiquitously affects panicle phenotypes when knocked out<sup>9</sup> (Supplementary Fig. 80).

The *FRIZZY PANICLE* (*FZP*) gene, a well characterized transcriptional regulator of primary branch meristem determinancy<sup>10</sup>, was detected when mapping across all varieties for the agronomic phenotype secondary branch number (Supplementary Fig. 60). Within *tropical japonica*, we detected a subpopulation specific peak for several primary branch length traits on chromosome 10 (Supplementary Figs. 21-23, 67),

encompassing the transcription factor *WRKY2*<sup>11</sup>. The WRKY gene family regulates a range of biological processes in plants, including disease resistance, drought tolerance, and development<sup>11,12</sup>, and one other member in rice has been linked with panicle exertion and seed formation<sup>13</sup>. Interestingly, *WRKY2* shares a gene coexpression network with multiple genes linked to heading date, flowering, and panicle phenotypes (Supplementary Fig. 82), which is consistent with the quantitative trait locus (QTL) we detect for heading date surrounding *WRKY2* in the recombinant inbred line (RIL) population (Supplementary Fig. 92).

Within the *aus* subpopulation we identified two genes with overlapping associations for different types of traits. The first, *CYP90D3*, was associated with maximum internode length and maximum primary branch length in the upper half of the panicle (Supplementary Fig. 10, 22). *CYP90D3* is a homolog of *D2 (DWARF EBISU)*, which encodes a cytochrome P450 brassinosteroid biosynthesis enzyme that has been linked with subtle changes in plant architecture and panicle phenotypes<sup>14</sup>. A recent study demonstrated that *CYP90D2* and *CYP90D3* catalyze many of the same reactions *in vitro*<sup>15</sup>, suggesting that *CYP90D3* may pleiotropically affect multiple panicle phenotypes similar to its homolog. Interestingly, *CYP90D3* shares a coexpression network with *OsMADS57* (Supplementary Fig. 77), a rice MADS-box gene that regulates *DWARF 14 (D14)* by forming a complex with rice *TEOSINTE BRANCHED 1 (OsTBI)*; this pathway has been shown to impact vegetative tillering, leading to changes in the number and size of panicles<sup>16</sup>. Finally, maximum internode length was associated with a second hormone gene in *aus*, rice ent-kaurene synthase (*OsKSI*) (Figure 7). *OsKSI* catalyzes an early step in gibberellin biosynthesis and is tandemly linked with two of its homologs on

chromosome 4 (*OsKS2*, *OsKS3*)<sup>3</sup>, and is discussed in detail within the main body of the paper.

## Supplementary References

1. Ueguchi-Tanaka, M. *et al.* GIBBERELLIN INSENSITIVE DWARF1 encodes a soluble receptor for gibberellin. *Nature* **437**, 693–698 (2005).
2. Ashikari, M. *et al.* Loss-of-function of a rice gibberellin biosynthetic gene, GA20 oxidase (GA20ox-2), led to the rice 'green revolution'. *Breed. Sci.* **52**, 143–150 (2002).
3. Sakamoto, T. *et al.* An overview of gibberellin metabolism enzyme genes and their related mutants in rice. *Plant Physiology* **134**, 1642–1653 (2004).
4. Bai, M.-Y. *et al.* Functions of OsBZR1 and 14-3-3 proteins in brassinosteroid signaling in rice. *Proceedings of the National Academy of Sciences* **104**, 13839–13844 (2007).
5. Piao, R. *et al.* Map-based cloning of the ERECT PANICLE 3 gene in rice. *TAG Theoretical and Applied Genetics* **119**, 1497–1506 (2009).
6. Li, M. *et al.* Mutations in the F-box gene LARGER PANICLE improve the panicle architecture and enhance the grain yield in rice. *Plant Biotechnology Journal* no–no (2011). doi:10.1111/j.1467-7652.2011.00610.x
7. Huang, X. *et al.* Natural variation at the DEP1 locus enhances grain yield in rice. *Nat Genet* **41**, 494–497 (2009).
8. Suzuki, T. The gene FLORAL ORGAN NUMBER1 regulates floral meristem size in rice and encodes a leucine-rich repeat receptor kinase orthologous to Arabidopsis CLAVATA1. *Development* **131**, 5649–5657 (2004).
9. Li, S. *et al.* Short panicle1 encodes a putative PTR family transporter and determines rice panicle size. *The Plant Journal* **58**, 592–605 (2009).
10. Komatsu, M. FRIZZY PANICLE is required to prevent the formation of axillary meristems and to establish floral meristem identity in rice spikelets. *Development* **130**, 3841–3850 (2003).
11. Ross, C. A., Liu, Y. & Shen, Q. J. The WRKY gene family in rice (*Oryza sativa*). *J. Integr. Plant Biol.* **49**, 827–842 (2007).
12. Rushton, P. J., Somssich, I. E., Ringler, P. & Shen, Q. J. WRKY transcription factors. *Trends in Plant Science* **15**, 247–258 (2010).
13. Zhang, C.-Q. *et al.* The WRKY transcription factor OsWRKY78 regulates stem elongation and seed development in rice. *Planta* **234**, 541–554 (2011).
14. Hong, Z. A Rice Brassinosteroid-Deficient Mutant, ebisu dwarf (d2), Is Caused by a Loss of Function of a New Member of Cytochrome P450. *The Plant Cell Online* **15**, 2900–2910 (2003).
15. Sakamoto, T., Ohnishi, T., Fujioka, S., Watanabe, B. & Mizutani, M. Rice CYP90D2 and CYP90D3 catalyze C-23 hydroxylation of brassinosteroids in vitro. *Plant Physiol. Biochem.* **58**, 220–226 (2012).
16. Guo, S. *et al.* The interaction between OsMADS57 and OsTB1 modulates rice tillering via DWARF14. *Nature Communications* **4**, 1566–12 (2013).
